# Supplementary material for: Age-Related Changes in MicroRNA in the Rat Pituitary and Potential Role in GH Regulation
Source: Int J Mol Sci. 2018 Jul 15;19(7):2058. doi: 10.3390/ijms19072058 (PMC6073141; doi:10.3390/ijms19072058)
Supplement: Supplementary file 1 [file ijms-19-02058-s001.zip]

Archive with 7 entries (7 files):
- supplementary files/Figure S1.pdf
- supplementary files/Table S1.xlsx
- supplementary files/Table S2.xlsx
- supplementary files/Table S3.xlsx
- supplementary files/Table S4.xlsx
- supplementary files/Table S5.xlsx
- supplementary files/Table S6.xlsx
