# Supplementary material for: Age-Related Changes in MicroRNA in the Rat Pituitary and Potential Role in GH Regulation
Source: Int J Mol Sci. 2018 Jul 15;19(7):2058. doi: 10.3390/ijms19072058 (PMC6073141; doi:10.3390/ijms19072058)
Supplement: Supplementary file 1 [file ijms-19-02058-s001.zip › supplementary files/Table S1.xlsx]

## Sheet: Table S1
Table S1. The miRNA expression profile data
		Group 1		Group 2		Group 3		Group 1	Group 1	Group 1	Group 1	Group 2	Group 2	Group 2	Group 2	Group 3	Group 3	Group 3	Group 3
		D7		D40		D250		S01 - D7-01	S01 - D7-02	S01 - D7-03	S01 - D7-04	S02 - D40-01	S02 - D40-02	S02 - D40-03	S02 - D40-04	S03 - D250-01	S03 - D250-02	S03 - D250-03	S03 - D250-04					miRRat_20_LCB_130805.xls
Rpter Index	Reporter Name	Mean	StDev	Mean	StDev	Mean	StDev	Signal	Signal	Signal	Signal	Signal	Signal	Signal	Signal	Signal	Signal	Signal	Signal	Target Sequence (5' to 3')	Note	Reporter Source	Accession No.	Reporter Name	Rat
7	rno-miR-99a-5p	3769.02	397.305	4704.02	362.298	3251.34	146.387	4286.12	3643.99	3334.59	3811.38	5185.8	4494.02	4367.34	4768.93	3469.73	3199.59	3171.78	3164.24	AACCCGUAGAUCCGAUCUUGUG	mature miRNA	standard	MIMAT0000820	rno-miR-99a-5p	rno-miR-99a-5p
14	rno-miR-181a-5p	3874.45	284.103	3327.02	78.3937	2072.73	178.024	3493.57	4110.57	3822.64	4071.03	3316.31	3436.34	3305.17	3250.25	2163.32	2190.06	2129.23	1808.32	AACAUUCAACGCUGUCGGUGAGU	mature miRNA	standard	MIMAT0000858	rno-miR-181a-5p	rno-miR-181a-5p
172	Q97	23219.1	2306.49	57296.9	1621.95	29626.7	1608.91	26568.5	22155.3	22782.6	21370.1	57125.5	55972.4	56465.4	59624.4	31976.9	28337.3	29004.3	29188.2	GGAGGCAGAGGCAGGAGGA		custom		Q97
177	rno-let-7a-5p	10042	1181.66	9586.16	487.096	10979.7	730.225	11458	10437.1	8696.3	9576.41	10248.7	9568.83	9084.19	9442.89	11793.8	11142	10025.7	10957.1	UGAGGUAGUAGGUUGUAUAGUU	mature miRNA	standard	MIMAT0000774	rno-let-7a-5p	rno-let-7a-5p
179	rno-let-7b-5p	3126.81	589.686	4552.59	496.791	5959.71	615.851	3811.76	3386.03	2479.96	2829.47	5215.9	4650.29	4146.49	4197.68	6722.21	5888.35	5218.86	6009.43	UGAGGUAGUAGGUUGUGUGGUU	mature miRNA	standard	MIMAT0000775	rno-let-7b-5p	rno-let-7b-5p
181	rno-let-7c-5p	7412.49	934.386	8396.13	511.469	8129.97	656.293	8558.15	7512.54	6279.34	7299.94	9088.05	8352.21	7855.15	8289.12	8870.24	8087.82	7281.56	8280.24	UGAGGUAGUAGGUUGUAUGGUU	mature miRNA	standard	MIMAT0000776	rno-let-7c-5p	rno-let-7c-5p
183	rno-let-7d-5p	6840.46	611.256	6955.7	203.99	8281.89	385.901	7479.32	7129.47	6061.28	6691.79	7194.7	6918.05	6703.32	7006.73	8611.09	8318.39	7731.49	8466.58	AGAGGUAGUAGGUUGCAUAGUU	mature miRNA	standard	MIMAT0000562	rno-let-7d-5p	rno-let-7d-5p
188	rno-let-7f-5p	11664.3	1231.3	10512.6	218.76	12966.7	726.725	13099.7	12165.8	11120.6	10271.2	10695	10440.1	10235.1	10680.1	13646.3	12729.4	12049.6	13441.2	UGAGGUAGUAGAUUGUAUAGUU	mature miRNA	standard	MIMAT0000778	rno-let-7f-5p	rno-let-7f-5p
190	rno-let-7i-5p	4975.76	485.078	4649.42	231.593	4311.63	292.489	5513.54	4795.34	4396.9	5197.25	4822.23	4598.24	4342.6	4834.59	4573.57	4166.24	3970.42	4536.31	UGAGGUAGUAGUUUGUGCUGUU	mature miRNA	standard	MIMAT0000779	rno-let-7i-5p	rno-let-7i-5p
194	rno-miR-7a-5p	61760.5	4055.14	38845.9	935.394	37864.1	1675.21	67447.1	61306	60389.7	57899.2	40171.3	38432.7	38764.9	38014.7	40278.2	37414.4	37361.1	36402.6	UGGAAGACUAGUGAUUUUGUUGU	mature miRNA	standard	MIMAT0000606	rno-miR-7a-5p	rno-miR-7a-5p
195	rno-miR-7b	9209.94	956.99	8364.37	570.388	18750.5	1368.21	10551.2	9056.55	8947.27	8284.74	9167.18	8362.85	8036.12	7891.32	20714.5	18634	17965.8	17687.8	UGGAAGACUUGUGAUUUUGUUGU	mature miRNA	standard	MIMAT0000780	rno-miR-7b	rno-miR-7b
207	rno-miR-16-5p	8291.25	225.433	6956.92	1538.25	5725.24	172.499	8262.67	8618.44	8144.51	8139.39	7687.79	4650.54	7700.47	7788.89	5854.49	5858.14	5695.5	5492.83	UAGCAGCACGUAAAUAUUGGCG	mature miRNA	standard	MIMAT0000785	rno-miR-16-5p	rno-miR-16-5p
225	rno-miR-23a-3p	2993.56	124.407	4902.08	222.375	4880.57	322.075	3014.67	3093.27	2813.26	3053.03	5208.89	4902.95	4689.57	4806.92	5311.37	4921.71	4723.79	4565.4	AUCACAUUGCCAGGGAUUUCC	mature miRNA	standard	MIMAT0000792	rno-miR-23a-3p	rno-miR-23a-3p
227	rno-miR-23b-3p	3921.56	218.381	5662.96	456.085	5550.31	353.147	4168.01	4000.8	3651.45	3865.97	6185.02	5808.1	5561.56	5097.14	6046.65	5531.18	5394.07	5229.35	AUCACAUUGCCAGGGAUUACC	mature miRNA	standard	MIMAT0000793	rno-miR-23b-3p	rno-miR-23b-3p
231	rno-miR-24-3p	6974.47	427.262	8151.36	89.154	5380.28	511.887	7471.06	7185.89	6567.02	6673.9	8211.61	8148.91	8026.18	8218.73	5664.16	5762.06	5458.67	4636.24	UGGCUCAGUUCAGCAGGAACAG	mature miRNA	standard	MIMAT0000794	rno-miR-24-3p	rno-miR-24-3p
235	rno-miR-26a-5p	19262.8	1253.03	12305.5	7817.55	14836.7	485.161	20503.5	19658.5	19359.9	17529.4	602.919	16051.7	15689	16878.3	15517.4	14666	14377.2	14786.2	UUCAAGUAAUCCAGGAUAGGCU	mature miRNA	standard	MIMAT0000796	rno-miR-26a-5p	rno-miR-26a-5p
237	rno-miR-26b-5p	4122.1	167.461	3505.63	147.308	5582.04	299.372	4260	4183.07	3878.4	4166.92	3610.86	3372.2	3385.88	3653.56	5952.14	5320.36	5358.21	5697.46	UUCAAGUAAUUCAGGAUAGGU	mature miRNA	standard	MIMAT0000797	rno-miR-26b-5p	rno-miR-26b-5p
251	rno-miR-30a-5p	8509.62	470.655	9798.26	430.609	11900.8	786.553	9210.41	8351.92	8214.44	8261.74	10422.7	9615.64	9710.44	9444.27	12771	11814	12135.2	10882.9	UGUAAACAUCCUCGACUGGAAG	mature miRNA	standard	MIMAT0000808	rno-miR-30a-5p	rno-miR-30a-5p
253	rno-miR-30b-5p	11038.8	1311.74	12101.6	790.26	13047.5	1304.39	12962.9	10461.5	10034.1	10696.7	13274.4	11618.1	11641.3	11872.7	14947.7	12456.1	12771.9	12014.2	UGUAAACAUCCUACACUCAGCU	mature miRNA	standard	MIMAT0000806	rno-miR-30b-5p	rno-miR-30b-5p
256	rno-miR-30c-5p	11991.7	1326.31	11236.9	662.087	11118.6	1138.67	13945.4	11255.8	11085.1	11680.5	12219.6	10780.2	10940.2	11007.5	12688.6	10758.8	11044	9982.98	UGUAAACAUCCUACACUCUCAGC	mature miRNA	standard	MIMAT0000804	rno-miR-30c-5p	rno-miR-30c-5p
258	rno-miR-30d-5p	7822.02	958.062	7139.9	160.217	7773.68	513.84	9233.92	7588.48	7157.41	7308.26	7338.33	6957.84	7178.37	7085.07	8070.14	7877.39	8127.39	7019.8	UGUAAACAUCCCCGACUGGAAG	mature miRNA	standard	MIMAT0000807	rno-miR-30d-5p	rno-miR-30d-5p
260	rno-miR-30e-5p	6418.25	464.754	8058	302.957	9900.5	206.154	6750.16	6835.93	5840.44	6246.48	8299.72	8176.24	7615.19	8140.83	10122.3	9909.99	9945.18	9624.46	UGUAAACAUCCUUGACUGGAAG	mature miRNA	standard	MIMAT0000805	rno-miR-30e-5p	rno-miR-30e-5p
302	rno-miR-125a-5p	3799.71	2455.78	7156.19	425.691	7300.41	663.917	5641.82	4888.55	4481.14	187.322	7735.6	7142.25	6718.77	7028.15	8149.11	7404.5	7086.02	6561.99	UCCCUGAGACCCUUUAACCUGUGA	mature miRNA	standard	MIMAT0000829	rno-miR-125a-5p	rno-miR-125a-5p
304	rno-miR-125b-5p	13785.9	1103.4	13364.4	282.945	9393.96	721.769	15144.5	13444.4	12511.6	14043.1	13627	13240	13025	13565.7	10321.7	9502.42	9152.99	8598.75	UCCCUGAGACCCUAACUUGUGA	mature miRNA	standard	MIMAT0000830	rno-miR-125b-5p	rno-miR-125b-5p
308	rno-miR-127-3p	7246.15	312.883	8233.1	217.754	6338.29	365.979	7489.63	7035.11	6922.24	7537.62	8432.89	8409.84	8055.04	8034.62	6626.49	6421.27	6501.28	5804.14	UCGGAUCCGUCUGAGCUUGGCU	mature miRNA	standard	MIMAT0000833	rno-miR-127-3p	rno-miR-127-3p
342	rno-miR-141-3p	2414.29	85.084	5353.61	96.9257	6551.48	276.915	2503.09	2450.07	2400.96	2303.05	5298.78	5462.1	5404.14	5249.43	6623.58	6762.85	6674.32	6145.18	UAACACUGUCUGGUAAAGAUGG	mature miRNA	standard	MIMAT0000846	rno-miR-141-3p	rno-miR-141-3p
392	rno-miR-191a-5p	15573	907.603	10890.4	358.322	5679.66	148.061	16467	16077.3	14404.8	15343	11228.2	10692	10487.5	11153.9	5819.18	5796.02	5555.45	5548.01	CAACGGAAUCCCAAAAGCAGCUG	mature miRNA	standard	MIMAT0000866	rno-miR-191a-5p	rno-miR-191a-5p
408	rno-miR-200a-3p	7618.52	308.983	7791.54	150.895	7165.64	377.996	7677.08	7249.7	7551.36	7995.94	7908.53	7781.95	7581.7	7893.99	7529.72	7175.91	7314.55	6642.37	UAACACUGUCUGGUAACGAUGU	mature miRNA	standard	MIMAT0000874	rno-miR-200a-3p	rno-miR-200a-3p
410	rno-miR-200b-3p	4816.54	321.618	3409.41	178.679	3629.97	229.998	4938.57	4427.29	4717.54	5182.75	3461.33	3289.47	3247.98	3638.84	3896.62	3436.52	3747.48	3439.27	UAAUACUGCCUGGUAAUGAUGAC	mature miRNA	standard	MIMAT0000875	rno-miR-200b-3p	rno-miR-200b-3p
412	rno-miR-200c-3p	9415.06	541.896	7324.52	216.098	6028.38	243.068	9764.94	8678.31	9343.04	9873.92	7424.64	7150.13	7141.53	7581.76	6365.55	5862.95	6046.08	5838.95	UAAUACUGCCGGGUAAUGAUG	mature miRNA	standard	MIMAT0000873	rno-miR-200c-3p	rno-miR-200c-3p
500	rno-miR-335	13169.1	810.741	15252.1	373.871	19396.6	1825.96	14192.2	13314.6	12252.2	12917.5	15587.6	15128	14779.6	15513.1	20872.2	19761.5	20208	16744.5	UCAAGAGCAAUAACGAAAAAUGU	mature miRNA	standard	MIMAT0000575	rno-miR-335	rno-miR-335
541	rno-miR-375-3p	18775.6	1077.78	20376.2	884.376	11464.7	555.466	20327.9	18612.9	17876.6	18285.1	21565.1	19425.1	20256.1	20258.4	12162.1	10831.3	11298.4	11566.8	UUUGUUCGUUCGGCUCGCGUGA	mature miRNA	standard	MIMAT0005307	rno-miR-375-3p	rno-miR-375-3p
545	rno-miR-376b-3p	2873.36	78.4088	3595.35	195.619	3723.65	240.222	2979.4	2802.59	2827.73	2883.71	3887.19	3488.74	3526.2	3479.25	4026.85	3634.1	3775.5	3458.17	AUCAUAGAGGAACAUCCACUU	mature miRNA	standard	MIMAT0003196	rno-miR-376b-3p	rno-miR-376b-3p
563	rno-miR-384-5p	2042.69	235.37	2797.21	155.704	4813.26	347.051	2329.04	2130.33	1798.35	1913.01	2963.26	2752.68	2602.67	2870.23	5280.27	4671.69	4463.13	4837.95	UGUAAACAAUUCCUAGGCAAUGU	mature miRNA	standard	MIMAT0005309	rno-miR-384-5p	rno-miR-384-5p
576	rno-miR-429	3560.26	184.888	3006.34	198.276	2216.97	101.157	3512.14	3409.51	3489.78	3829.6	3090.26	2926.03	2776.02	3233.06	2291.23	2142.88	2117.65	2316.12	UAAUACUGUCUGGUAAUGCCGU	mature miRNA	standard	MIMAT0001538	rno-miR-429	rno-miR-429
580	rno-miR-434-3p	2971.28	314.495	2443.58	127.275	2903.58	208.836	2906.55	2746.93	2799.25	3432.37	2615.84	2460.57	2368.02	2329.88	3006.62	2690.43	2773.27	3144	UUUGAACCAUCACUCGACUCCU	mature miRNA	standard	MIMAT0005315	rno-miR-434-3p	rno-miR-434-3p
46	rno-miR-495	2029.41	83.022	2291.94	8.48737	609.738	16.0574	2127.57	1943.23	1981.33	2065.51	2294.24	2279.43	2296.06	2298.04	626.758	615.468	608.169	588.559	AAACAAACAUGGUGCACUUCUU	mature miRNA	standard	MIMAT0005320	rno-miR-495	rno-miR-495
185	rno-let-7e-5p	1898.37	219.277	2434.28	139.049	4402.7	317.06	2153.67	1862.43	1624.8	1952.57	2570.59	2417.47	2248.04	2501.02	4794.9	4192.26	4103.31	4520.34	UGAGGUAGGAGGUUGUAUAGUU	mature miRNA	standard	MIMAT0000777	rno-let-7e-5p	rno-let-7e-5p
243	rno-miR-29a-3p	1360.45	118.021	7963.21	69.5355	10441.5	403.315	1520.04	1362.52	1239.34	1319.9	8031.69	7939.44	7876.63	8005.1	10918.9	10620.1	10194.5	10032.6	UAGCACCAUCUGAAAUCGGUUA	mature miRNA	standard	MIMAT0000802	rno-miR-29a-3p	rno-miR-29a-3p
247	rno-miR-29b-3p	1006.78	53.7987	4348.04	386.5	16480.6	773.188	1074.08	1009.15	942.609	1001.3	4847.29	4459.48	4044.38	4041.01	16878.7	17242.9	16336.9	15464.1	UAGCACCAUUUGAAAUCAGUGUU	mature miRNA	standard	MIMAT0000801	rno-miR-29b-3p	rno-miR-29b-3p
284	rno-miR-99b-5p	2535.03	243.745	2621.11	198.961	826.23	546.552	2833.44	2385.76	2293.46	2627.46	2886.44	2511.12	2433.45	2653.44	1137.76	1090.46	7.52997	1069.18	CACCCGUAGAACCGACCUUGCG	mature miRNA	standard	MIMAT0000821	rno-miR-99b-5p	rno-miR-99b-5p
292	rno-miR-103-3p	6085.93	136.621	3569.49	56.6817	1672.9	537.389	6220.24	5924.72	6023.21	6175.56	3595.75	3522.55	3522.68	3636.97	874.709	2014.36	1965.87	1836.67	AGCAGCAUUGUACAGGGCUAUGA	mature miRNA	standard	MIMAT0000824	rno-miR-103-3p	rno-miR-103-3p
296	rno-miR-107-3p	5862.02	178.085	3465.52	87.005	1872.6	116.983	6044.12	5624.48	5844.9	5934.6	3580.86	3379.9	3422.09	3479.24	2012.8	1892.07	1857.05	1728.46	AGCAGCAUUGUACAGGGCUAUCA	mature miRNA	standard	MIMAT0000826	rno-miR-107-3p	rno-miR-107-3p
305	rno-miR-126a-3p	4380.73	283.592	3092.57	76.3011	1987.94	627.142	4721.77	4335.16	4033.96	4432.05	3175.3	3139.41	3023.67	3031.91	1047.3	2308.3	2291.11	2305.06	UCGUACCGUGAGUAAUAAUGCG	mature miRNA	standard	MIMAT0000832	rno-miR-126a-3p	rno-miR-126a-3p
314	rno-miR-130a-3p	5028.09	187.117	2662.86	48.8887	1712.93	119.301	5076.95	5187.85	5090.17	4757.4	2671.71	2695.51	2692.92	2591.29	1775.62	1764.31	1777.61	1534.2	CAGUGCAAUGUUAAAAGGGCAU	mature miRNA	standard	MIMAT0000836	rno-miR-130a-3p	rno-miR-130a-3p
323	rno-miR-133b-5p	1760.15	234.145	2556.58	522.668	41438.3	1831.27	1726.12	1766.38	1488.66	2059.43	2230.12	2123.55	2592.06	3280.59	43155.1	41938.6	41813.9	38845.6	GCUGGUCAAACGGAACCAAGU	mature miRNA	standard	MIMAT0017205	rno-miR-133b-5p	rno-miR-133b-5p
423	rno-miR-204-5p	868.553	95.0016	2072.03	240.528	2065.09	267.153	998.166	801.863	793.22	880.961	2396	2110.96	1865.74	1915.4	2447.53	1995.27	1824.78	1992.77	UUCCCUUUGUCAUCCUAUGCCU	mature miRNA	standard	MIMAT0000877	rno-miR-204-5p	rno-miR-204-5p
37	rno-miR-376c-3p	1339.65	106.061	1800.38	113.455	3078.42	230.954	1498.69	1287.44	1289.44	1283.04	1956.98	1696.25	1743.53	1804.78	3419.56	2911.85	2972.98	3009.3	AACAUAGAGGAAAUUUCACGU	mature miRNA	standard	MIMAT0003194	rno-miR-376c-3p	rno-miR-376c-3p
45	rno-miR-487b-3p	2115.71	148.834	1403.58	70.3005	1295.31	100.555	2194.32	1941.88	2050.33	2276.29	1459.36	1416.81	1436.77	1301.41	1346.52	1305.38	1378.1	1151.24	AAUCGUACAGGGUCAUCCACUU	mature miRNA	standard	MIMAT0003200	rno-miR-487b-3p	rno-miR-487b-3p
205	rno-miR-15b-5p	3359.73	261.875	1780.47	26.7665	585.517	22.4051	3706.25	3353.29	3071.81	3307.57	1781.12	1816.9	1753.76	1770.09	559.51	612.207	577.526	592.824	UAGCAGCACAUCAUGGUUUACA	mature miRNA	standard	MIMAT0000784	rno-miR-15b-5p	rno-miR-15b-5p
248	rno-miR-29c-3p	230.062	5.97072	1991.24	94.5157	4390.55	306.663	226.883	238.945	226.297	228.124	2114.53	2011.97	1899.23	1939.24	4636.28	4657.04	4233.32	4035.58	UAGCACCAUUUGAAAUCGGUUA	mature miRNA	standard	MIMAT0000803	rno-miR-29c-3p	rno-miR-29c-3p
281	rno-miR-98-5p	1193.07	144.234	1092.78	73.8777	2072.14	148.214	1395.87	1165.19	1054.6	1156.61	1196.23	1031.19	1049.46	1094.25	2287.17	1990.82	2050.64	1959.94	UGAGGUAGUAAGUUGUAUUGUU	mature miRNA	standard	MIMAT0000819	rno-miR-98-5p	rno-miR-98-5p
295	rno-miR-106b-5p	2001.04	73.639	672.708	41.8423	325.268	9.21658	1988.37	1991.56	1923.31	2100.92	691.204	646.393	630.862	722.374	315.856	319.035	331.506	334.674	UAAAGUGCUGACAGUGCAGAU	mature miRNA	standard	MIMAT0000825	rno-miR-106b-5p	rno-miR-106b-5p
318	rno-miR-132-3p	1643.37	149.213	3675.78	59.6765	1411.08	36.8036	1654.58	1527.09	1541.58	1850.22	3697.01	3596.68	3670.8	3738.64	1453.74	1374.35	1429.07	1387.17	UAACAGUCUACAGCCAUGGUCG	mature miRNA	standard	MIMAT0000838	rno-miR-132-3p	rno-miR-132-3p
340	rno-miR-140-3p	1646.37	86.8138	2308.11	101.803	712.102	406.674	1660.43	1590.02	1571.75	1763.29	2444.53	2318.11	2206.07	2263.74	115.853	972.219	970.956	789.381	UACCACAGGGUAGAACCACGG	mature miRNA	standard	MIMAT0000574	rno-miR-140-3p	rno-miR-140-3p
378	rno-miR-183-5p	2478.17	172.191	429.302	14.3003	588.606	29.7777	2478.26	2429.56	2295.79	2709.09	432.639	425.884	412.157	446.528	623.604	602.517	559.367	568.937	UAUGGCACUGGUAGAAUUCACU	mature miRNA	standard	MIMAT0000860	rno-miR-183-5p	rno-miR-183-5p
400	rno-miR-195-5p	795.932	16.5611	1980.38	80.6875	2072.65	83.0426	809.657	810.856	780.809	782.405	2080.07	1974.29	1882.71	1984.46	2196.93	2032.58	2037.27	2023.81	UAGCAGCACAGAAAUAUUGGC	mature miRNA	standard	MIMAT0000870	rno-miR-195-5p	rno-miR-195-5p
441	rno-miR-216a-5p	97.1023	11.2233	2016.43	182.284	1632.37	90.608	110.237	85.8851	102.376	89.9106	2096.39	2141.33	2082.38	1745.62	1708.91	1641.39	1676.29	1502.9	UAAUCUCAGCUGGCAACUGUGA	mature miRNA	standard	MIMAT0000886	rno-miR-216a-5p	rno-miR-216a-5p
540	rno-miR-374-5p	598.923	68.2052	898.815	117.607	3046.07	257.699	687.417	617.543	549.904	540.827	1072.42	864.112	845.27	813.462	3328.75	2902.55	3187.48	2765.49	AUAUAAUACAACCUGCUAAGUG	mature miRNA	standard	MIMAT0003208	rno-miR-374-5p	rno-miR-374-5p
546	rno-miR-376b-5p	746.785	70.6004	1205.05	102.089	2426.23	186.719	845.198	724.128	678.204	739.611	1342.8	1100.16	1169.27	1207.99	2692.67	2269.79	2332.01	2410.45	GUGGAUAUUCCUUCUAUGGUUA	mature miRNA	standard	MIMAT0003195	rno-miR-376b-5p	rno-miR-376b-5p
562	rno-miR-384-3p	274.264	44.0799	691.526	50.5327	3064.04	244.968	316.307	301.221	261.611	217.919	763.495	661.724	651.682	689.202	3409.92	2980.48	2835.4	3030.37	AUUCCUAGAAAUUGUUCACAAU	mature miRNA	standard	MIMAT0005310	rno-miR-384-3p	rno-miR-384-3p
657	rno-miR-664-1-5p	111.891	18.3869	254.764	353.733	7002.97	534.155	138.619	101.384	98.3996	109.161	92.9253	69.1271	71.8791	785.123	6844.1	6593.85	7787.98	6785.94	CUGGCUGGGGAAAAAGAUUGG	mature miRNA	standard	MIMAT0017228	rno-miR-664-1-5p	rno-miR-664-1-5p
807	rno-miR-6216	24.0193	7.50997	1575.34	90.8284	5281.55	1234.73	16.7934	18.9356	32.947	27.4013	1557.69	1708.05	1507.65	1527.96	5654.82	6344.62	5629.36	3497.38	GAUACACAGAGGCAGGAGGAGAA	mature miRNA	standard	MIMAT0024856	rno-miR-6216	rno-miR-6216
Following transcripts are statistically significant but have low signals (signal < 2000)
1	rno-miR-7a-1-3p	34.9163	6.1346	59.3231	6.93627	38.353	5.87662	41.4989	38.4785	28.1977	31.4899	52.1453	60.531	56.2444	68.3717	36.896	43.4424	42.4098	30.6639	ACAACAAAUCACAGUCUGCCAU	mature miRNA	standard	MIMAT0000607	rno-miR-7a-1-3p	rno-miR-7a-1-3p
2	rno-miR-22-3p	677.971	43.7755	1728.5	43.142	1738.6	83.4823	715.861	713.412	627.731	654.88	1787.38	1703.28	1690.29	1733.06	1727.12	1844.63	1741.66	1641.01	AAGCUGCCAGUUGAAGAACUGU	mature miRNA	standard	MIMAT0000791	rno-miR-22-3p	rno-miR-22-3p
3	rno-miR-28-5p	121.601	12.5443	103.133	3.95577	99.9372	14.8279	123.199	138.156	108.609	116.438	97.2384	105.523	105.3	104.471	120.264	94.1344	99.9989	85.3514	AAGGAGCUCACAGUCUAUUGAG	mature miRNA	standard	MIMAT0000800	rno-miR-28-5p	rno-miR-28-5p
5	rno-miR-34b-3p	13.1583	2.97924	37.2688	6.35857	37.1665	8.07147	8.95826	15.6473	13.1989	14.8288	32.2057	45.3073	32.1332	39.4291	32.4656	31.4109	35.8544	48.9351	AAUCACUAACUCCACUGCCAUC	mature miRNA	standard	MIMAT0017105	rno-miR-34b-3p	rno-miR-34b-3p
6	rno-miR-34c-3p	35.8124	9.10901	44.6801	6.78668	42.6198	1.89841	30.2914	48.9945	34.75	29.2137	44.3277	39.199	54.3421	40.8518	41.2226	41.9537	45.4245	41.8784	AAUCACUAACCACACAGCCAGG	mature miRNA	standard	MIMAT0004723	rno-miR-34c-3p	rno-miR-34c-3p
8	rno-miR-100-5p	1323.27	98.436	1695.64	123.464	1919.74	427.713	1459.97	1321.84	1230.8	1280.48	1858.42	1711.74	1567.63	1644.76	2204.71	2051.61	2137.54	1285.09	AACCCGUAGAUCCGAACUUGUG	mature miRNA	standard	MIMAT0000822	rno-miR-100-5p	rno-miR-100-5p
10	rno-miR-125b-2-3p	76.6503	15.2277	77.2307	10.113	65.4604	4.52444	83.9151	88.4292	79.8327	54.4241	92.0458	70.663	75.364	70.8502	71.8937	65.2674	62.8492	61.8315	ACAAGUCAGGCUCUUGGGACCU	mature miRNA	standard	MIMAT0026467	rno-miR-125b-2-3p	rno-miR-125b-2-3p
11	rno-miR-129-1-3p	285.18	26.5796	1110.01	34.3722	1606.65	137.707	319.633	268.524	260.524	292.038	1129.29	1066.26	1100.36	1144.15	1803.92	1578.45	1560.14	1484.11	AAGCCCUUACCCCAAAAAG	mature miRNA	standard	MIMAT0017120	rno-miR-129-1-3p	rno-miR-129-1-3p
12	rno-miR-129-2-3p	484.408	33.5177	1527.55	120.361	1672.85	158.912	516.544	446.834	465.785	508.47	1545.61	1437.5	1436.19	1690.89	1903.5	1593.96	1646.08	1547.88	AAGCCCUUACCCCAAAAAGCAU	mature miRNA	standard	MIMAT0000601	rno-miR-129-2-3p	rno-miR-129-2-3p
13	rno-miR-154-3p	232.416	26.0021	397.258	17.4652	464.776	29.0309	200.986	264.43	229.346	234.904	415.657	408.4	379.649	385.326	493.976	472.387	424.688	468.052	AAUCAUACACGGUUGACCUAUU	mature miRNA	standard	MIMAT0017136	rno-miR-154-3p	rno-miR-154-3p
15	rno-miR-181b-5p	226.559	15.8244	139.635	11.5276	135.744	9.4976	248.928	211.661	222.116	223.531	153.813	141.492	125.889	137.346	146.841	136.319	123.623	136.192	AACAUUCAUUGCUGUCGGUGGGU	mature miRNA	standard	MIMAT0000859	rno-miR-181b-5p	rno-miR-181b-5p
16	rno-miR-181c-5p	1014.44	12.2775	926.145	34.2918	445.761	75.9204	1021.98	1023.83	1015.04	996.923	929.462	973.265	897.421	904.432	473.832	477.577	498.579	333.059	AACAUUCAACCUGUCGGUGAGU	mature miRNA	standard	MIMAT0000857	rno-miR-181c-5p	rno-miR-181c-5p
17	rno-miR-181d-5p	528.047	65.9803	264.537	23.5284	165.412	8.95312	553.859	467.39	481.801	609.139	295.186	250.268	242.497	270.198	177.704	165.556	156.741	161.647	AACAUUCAUUGUUGUCGGUGGGU	mature miRNA	standard	MIMAT0005299	rno-miR-181d-5p	rno-miR-181d-5p
19	rno-miR-193-3p	66.6439	20.6814	87.4399	8.34792	67.4113	7.71459	39.0372	78.0109	86.1646	63.363	86.9791	87.4571	97.8782	77.4453	70.3839	71.0211	72.3364	55.9039	AACUGGCCUACAAAGUCCCAGU	mature miRNA	standard	MIMAT0000868	rno-miR-193-3p	rno-miR-193-3p
22	rno-miR-216b-5p	3.40606	4.36416	165.612	26.4773	105.21	8.97634	0.0100072	9.14786	0.0100072	4.45634	205.128	150.537	150.59	156.191	114.465	109.571	103.112	93.6925	AAAUCUCUGCAGGCAAAUGUGA	mature miRNA	standard	MIMAT0017846	rno-miR-216b-5p	rno-miR-216b-5p
25	rno-miR-291a-3p	2.26487	2.18983	27.5471	54.6278	2.80784	2.2363	3.83059	4.42716	0.794596	0.00714621	109.488	0.665606	0.0176979	0.0176979	2.81352	2.10312	0.486949	5.82775	AAAGUGCUUCCACUUUGUGUGCC	mature miRNA	standard	MIMAT0000895	rno-miR-291a-3p	rno-miR-291a-3p
28	rno-miR-295-3p	15.4637	23.4015	0.0228718	0	1.00478	1.4629	3.30244	4.88951	3.11714	50.5457	0.0228718	0.0228718	0.0228718	0.0228718	0.00684497	0.898902	3.10652	0.00684497	AAGUGCUACUACUUUUGGGUGU	mature miRNA	standard	MIMAT0017366	rno-miR-295-3p	rno-miR-295-3p
29	rno-miR-320-3p	513.558	81.8087	1143.32	82.5328	815.54	74.2406	606.464	533.864	408.86	505.044	1212.49	1166.87	1023.48	1170.43	897.795	836.97	719.344	808.05	AAAAGCUGGGUUGAGAGGGCGA	mature miRNA	standard	MIMAT0000903	rno-miR-320-3p	rno-miR-320-3p
30	rno-miR-322-3p	100.157	8.55435	29.1302	4.2523	7.80838	4.06531	99.9836	107.689	88.2413	104.716	30.3321	23.8395	34.0426	28.3068	8.23093	2.56921	12.4918	7.94155	AAACAUGAAGCGCUGCAACA	mature miRNA	standard	MIMAT0000547	rno-miR-322-3p	rno-miR-322-3p
31	rno-miR-329-3p	1107.07	130.044	1230.3	126.36	1260.67	129.375	1157.44	1009.41	993.714	1267.73	1298.01	1175.81	1081.81	1365.57	1436.54	1270.58	1198.85	1136.71	AACACACCCAGCUAACCUUUUU	mature miRNA	standard	MIMAT0000566	rno-miR-329-3p	rno-miR-329-3p
32	rno-miR-338-5p	25.4629	5.4519	28.0153	7.49523	37.2911	0.959051	28.2584	30.9071	18.3623	24.3238	35.7851	32.9738	22.7865	20.516	36.232	37.2346	37.1377	38.5603	AACAAUAUCCUGGUGCUGAGUG	mature miRNA	standard	MIMAT0004646	rno-miR-338-5p	rno-miR-338-5p
33	rno-miR-362-3p	20.8829	6.95064	46.0182	4.03759	26.0552	5.02865	15.5337	20.6572	16.5734	30.7671	48.0478	39.9786	48.3911	47.6553	24.733	20.9318	32.9584	25.5976	AACACACCUGUUCAAGGAUUCA	mature miRNA	standard	MIMAT0017357	rno-miR-362-3p	rno-miR-362-3p
34	rno-miR-362-5p	40.677	12.5786	49.5774	5.89569	17.8352	1.2186	28.1559	48.3356	31.9859	54.2304	53.533	51.6401	52.3246	40.8122	17.2277	18.0203	16.6389	19.454	AAUCCUUGGAACCUAGGUGUGAAU	mature miRNA	standard	MIMAT0012828	rno-miR-362-5p	rno-miR-362-5p
36	rno-miR-369-3p	99.3897	11.3936	77.5661	14.0224	1119.6	78.7888	116.071	91.6983	92.4844	97.3054	95.3541	81.2804	70.5897	63.0401	1144.77	1219.97	1052.67	1060.98	AAUAAUACAUGGUUGAUCUUU	mature miRNA	standard	MIMAT0003207	rno-miR-369-3p	rno-miR-369-3p
38	rno-miR-382-3p	351.053	41.0212	255.793	37.7806	376.759	32.8208	350.439	400.364	353.449	299.96	309.646	250.92	240.214	222.393	424.253	368.898	364.967	348.918	AAUCAUUCACGGACAACACUU	mature miRNA	standard	MIMAT0003202	rno-miR-382-3p	rno-miR-382-3p
39	rno-miR-409a-3p	450.486	44.9101	188.841	69.5934	282.966	19.5506	502.089	473.159	405.752	420.945	251.978	244.728	142.308	116.351	302.381	286.536	255.776	287.172	AAUGUUGCUCGGUGAACCCC	mature miRNA	standard	MIMAT0003205	rno-miR-409a-3p	rno-miR-409a-3p
40	rno-miR-410-3p	1184.92	83.5635	737.037	17.498	548.62	64.6699	1287.81	1211.62	1145.12	1095.11	744.33	743.324	711.094	749.398	465.014	622.214	560.349	546.905	AAUAUAACACAGAUGGCCUGU	mature miRNA	standard	MIMAT0005311	rno-miR-410-3p	rno-miR-410-3p
41	rno-miR-425-5p	1561.93	91.3418	1384.74	40.8912	715.161	40.7857	1657.56	1622.13	1476.34	1491.67	1396.16	1434.56	1337.86	1370.37	734.318	742.773	728.973	654.579	AAUGACACGAUCACUCCCGUUGA	mature miRNA	standard	MIMAT0005314	rno-miR-425-5p	rno-miR-425-5p
43	rno-miR-451-5p	1681.86	139.006	1021.49	23.0741	729.153	89.3388	1884.63	1618.74	1572.58	1651.48	1055.44	1004.57	1015.56	1010.41	861.549	701.61	667.787	685.665	AAACCGUUACCAUUACUGAGUU	mature miRNA	standard	MIMAT0001633	rno-miR-451-5p	rno-miR-451-5p
44	rno-miR-483-5p	48.9454	5.45508	35.4767	6.37647	41.942	4.52579	45.0771	43.724	51.7971	55.1836	44.7837	32.6724	30.4433	34.0072	41.2544	48.5172	38.5457	39.4507	AAGACGGGAGAAGAGAAGGGAG	mature miRNA	standard	MIMAT0017201	rno-miR-483-5p	rno-miR-483-5p
47	rno-miR-499-3p	0.283396	0.559025	0.510934	0.666507	50.6568	101.295	0.00388344	0.00388344	0.00388344	1.12193	0.0283497	1.44137	0.0283497	0.545664	0.00908312	202.6	0.00908312	0.00908312	AACAUCACAGCAAGUCUGUGCU	mature miRNA	standard	MIMAT0017227	rno-miR-499-3p	rno-miR-499-3p
48	rno-miR-500-3p	51.8327	6.45121	62.8478	10.8906	36.4278	1.81007	59.0328	54.568	44.0211	49.709	67.9463	72.1955	63.9342	47.3152	34.8585	35.5027	38.9788	36.3712	AAUGCACCUGGGCAAGGGUUCA	mature miRNA	standard	MIMAT0005321	rno-miR-500-3p	rno-miR-500-3p
49	rno-miR-500-5p	2.73372	1.96587	53.2286	96.5998	1.67163	3.32632	2.96878	3.27334	4.68597	0.00678797	0.295647	9.99959	4.61327	198.006	0.0084713	0.0084713	0.0084713	6.66111	AAUCCUUGCUAUCUGGGUGCUUAG	mature miRNA	standard	MIMAT0017311	rno-miR-500-5p	rno-miR-500-5p
53	rno-miR-541-5p	646.752	42.7424	558.841	50.5196	590.416	61.9963	640.415	629.906	608.908	707.781	591.163	577.58	483.525	583.096	665.346	611.735	562.659	521.924	AAGGGAUUCUGAUGUUGGUCACACU	mature miRNA	standard	MIMAT0003177	rno-miR-541-5p	rno-miR-541-5p
54	rno-miR-543-3p	315.594	18.0564	245.955	14.2143	103.656	20.2864	296.657	339.77	309.712	316.237	253.33	259.025	245.006	226.46	108.774	128.649	96.6759	80.5253	AAACAUUCGCGGUGCACUUCU	mature miRNA	standard	MIMAT0003175	rno-miR-543-3p	rno-miR-543-3p
55	rno-miR-543-5p	64.2298	11.2349	16.7912	3.10508	11.5067	4.83267	56.6957	74.1573	52.5334	73.5329	18.3186	14.6753	20.3977	13.7733	9.5949	12.8573	6.11146	17.4629	AAGUUGCCCGCGUGUUUUUCG	mature miRNA	standard	MIMAT0004787	rno-miR-543-5p	rno-miR-543-5p
56	rno-miR-582-3p	20.7589	5.16277	27.1794	11.0446	37.7169	4.69327	18.0023	28.0509	20.6016	16.381	41.2747	22.5463	29.5561	15.3406	32.8489	42.8292	34.7472	40.4423	AACCUGUUGAACAACUGAACCC	mature miRNA	standard	MIMAT0017360	rno-miR-582-3p	rno-miR-582-3p
57	rno-miR-652-3p	728.443	44.8508	284.177	31.2718	142.62	20.5458	751.304	727.928	768.565	665.976	301.77	299.175	298.445	237.318	143.411	147.771	164.363	114.935	AAUGGCGCCACUAGGGUUGUG	mature miRNA	standard	MIMAT0005342	rno-miR-652-3p	rno-miR-652-3p
58	rno-miR-652-5p	24.914	6.99605	12.9341	1.82224	19.7364	3.00779	17.4992	33.5757	27.1238	21.4574	12.7592	11.4306	12.0038	15.5428	16.0954	20.0168	23.4363	19.397	ACAACCCUAGGAGGGGGUGCCAU	mature miRNA	standard	MIMAT0017321	rno-miR-652-5p	rno-miR-652-5p
59	rno-miR-672-3p	23.5855	3.77719	33.0763	5.14754	24.0473	5.19013	20.8549	22.3551	21.9612	29.1706	39.614	27.6217	34.3252	30.7445	18.299	22.7832	24.2684	30.8386	ACACACAGUCGCCAUCUUCGA	mature miRNA	standard	MIMAT0017312	rno-miR-672-3p	rno-miR-672-3p
60	rno-miR-708-5p	586.264	43.3922	522.322	29.0124	335.688	10.882	630.249	577.029	529.999	607.777	538.852	554.319	503.092	493.025	342.016	347.501	328.972	324.262	AAGGAGCUUACAAUCUAGCUGGG	mature miRNA	standard	MIMAT0005331	rno-miR-708-5p	rno-miR-708-5p
62	rno-miR-872-5p	568.202	36.8771	320.766	18.2409	445.314	53.7692	618.066	529.032	561.899	563.809	347.995	313.199	309.167	312.706	522.525	399.384	422.158	437.19	AAGGUUACUUGUUAGUUCAGG	mature miRNA	standard	MIMAT0005282	rno-miR-872-5p	rno-miR-872-5p
63	rno-miR-1839-5p	193.657	23.0749	132.409	1.93265	163.35	12.1405	199.914	176.757	174.321	223.635	133.407	132.112	129.836	134.28	163.738	157.327	152.205	180.129	AAGGUAGAUAGAACAGGUCUUG	mature miRNA	standard	MIMAT0024843	rno-miR-1839-5p	rno-miR-1839-5p
65	rno-miR-3544	52.9194	8.99867	27.4483	0.793206	19.8381	3.45123	50.0206	41.593	58.4415	61.6225	27.1863	28.4066	27.6737	26.5265	19.746	18.3202	16.6354	24.6509	AACUCCUGCAUGACGCCGUUCCC	mature miRNA	standard	MIMAT0017798	rno-miR-3544	rno-miR-3544
66	rno-miR-3557-3p	2.21618	2.84745	62.9687	125.141	0.00780554	0	0.00587856	0.00587856	2.88018	5.97278	0.0217934	0.0217934	1.15301	250.678	0.00780554	0.00780554	0.00780554	0.00780554	ACACAGGACCUGGAGUCAGGAG	mature miRNA	standard	MIMAT0017820	rno-miR-3557-3p	rno-miR-3557-3p
81	Q14	16.5676	9.13448	29.1659	9.16425	22.8082	2.40661	12.3636	12.8294	30.2116	10.8658	38.9879	34.9123	20.5855	22.1777	23.6707	25.7044	21.6968	20.1609	UUAGCGGUGGACCGCCCUGCG		custom		Q14
99	Q30	47.41	10.8031	5.29619	3.80058	65.9605	41.0165	44.2909	57.754	53.9783	33.6168	3.5973	10.9354	2.66167	3.99034	127.393	42.5077	47.9179	46.0231	CUGGGCCCGCGGCGGGCGUGGGG		custom		Q30
101	Q32	31.2725	6.86765	8.07027	4.22626	26.1023	3.97638	25.2521	37.0357	25.401	37.4012	11.9935	11.4517	4.61522	4.22057	27.5062	22.8372	31.0992	22.9665	UGCAGGGGUCGGGUGGGCCAGG		custom		Q32
112	Q42	23.2895	44.0024	0.255262	0.268221	4.07378	8.13263	3.57381	0.00581033	0.329667	89.2488	0.0230616	0.47857	0.0230616	0.496357	16.2727	0.00746293	0.00746293	0.00746293	AUCCUUGGCCUUCCUAGGUGU		custom		Q42
115	Q45	767.152	83.5187	276.885	8.372	140.149	4.06138	871.873	679.015	726.814	790.907	287.953	267.63	275.493	276.462	145.116	136.178	137.583	141.718	AGAAAGGCAUCAUAUAGGAGCUG		custom		Q45
123	Q52	19.624	30.5221	1.99614	1.61818	13.6827	16.3411	0.00850003	0.00850003	14.1824	64.2967	2.17919	1.82888	3.96231	0.0141672	37.82	8.57351	6.55062	1.78674	UGCCUGGGUCUCUGGCCUGCGCGU		custom		Q52
128	Q57	0.237969	0.27116	0.913205	1.07417	40.5041	72.9647	0.00639821	0.00639821	0.524687	0.414392	1.4525	0.0176975	0.0176975	2.16492	149.915	2.39406	3.05853	6.64873	CCCUUGGGUCUGAUGGGGUAG		custom		Q57
134	Q62	13.1596	7.14319	17.5547	6.3805	39.4313	4.77555	6.86028	17.432	20.9954	7.35088	19.0036	19.9888	8.31357	22.9128	33.2364	38.7505	41.146	44.5924	GAGGGCAGCGUGGGUGUGGCGGA		custom		Q62
137	Q65	90.5599	5.26108	52.4688	4.43143	105.624	10.9258	85.6461	93.4816	96.4738	86.638	49.0912	48.233	55.7365	56.8144	116.521	109.947	105.255	90.7727	GCGGAAGGCGGAGCGGCGGA		custom		Q65
144	Q71	0.00489192	0	0.636608	0.736449	37.395	69.4087	0.00489192	0.00489192	0.00489192	0.00489192	1.01658	1.48789	0.0209775	0.0209775	141.441	2.12294	0.00974467	6.00589	AUCGCUGCGGUUGCGAGCGCUGU		custom		Q71
145	Q72	1.3319	1.74425	29.9422	54.7455	0.00860051	0	0.00607776	3.68145	0.00607776	1.634	0.0191307	7.85742	111.873	0.0191307	0.00860051	0.00860051	0.00860051	0.00860051	CCUCAGGGCUGUAGAACAGGGCU		custom		Q72
146	Q73	2.96333	3.74329	4.38084	4.72416	41.3829	74.7491	0.0078457	7.80258	0.0078457	4.03503	4.64943	0.0145246	10.8693	1.99007	153.477	6.40302	3.1811	2.4704	UUCACAGGGAGGUGUCAU		custom		Q73
149	Q76	35.5911	57.8876	8.50444	4.51852	9.64184	3.64628	122.109	8.68163	11.5638	0.00926716	12.7396	11.5551	2.92946	6.79356	6.09589	11.0991	14.0779	7.29447	UGUCAGUGACUCCUGCCCCUUGGU		custom		Q76
153	Q8	0.425153	0.841943	15.6718	31.2878	1.37911	1.65625	0.00418161	0.00418161	0.00418161	1.68807	0.0278916	62.6035	0.0278916	0.0278916	2.15129	0.008574	0.008574	3.348	AUUGUCCUUGCUGUUUGGAGAU		custom		Q8
154	Q80	3.0715	5.03255	9.48033	3.18687	17.9629	10.8645	1.75089	10.5191	0.0080349	0.0080349	12.534	9.95775	10.4242	5.00542	32.5219	17.8426	15.0967	6.39048	ACAGUAGAGGGAGGAAUCGCAG		custom		Q80
157	Q83	4.04321	4.51778	39.8109	64.9374	14.3804	5.03782	10.4411	3.6448	0.0086134	2.0783	137.133	3.86574	7.81161	10.4335	8.75216	12.5962	20.714	15.4594	GGAGUGGGCUGGUGGUU		custom		Q83
158	Q84	85.4027	9.42998	10.9115	6.19499	14.9744	5.77155	81.1141	89.2215	74.8281	96.447	1.66746	14.3982	14.4797	13.1007	16.9674	18.9025	17.6264	6.40132	CUCGGCGCGGGGCGCGGGCUCC		custom		Q84
159	Q85	19.4806	33.1937	3.32516	6.60708	2.52772	2.81275	0.00670226	4.66653	4.07503	69.174	0.0216213	0.0216213	0.0216213	13.2358	0.00690077	6.28972	0.798698	3.01557	CUUGGGGCAUGGAGUCCCA		custom		Q85
160	Q86	28.8453	50.8344	2.40284	3.02316	1.07408	1.97119	105.041	2.59733	6.12749	1.61505	0.0172553	3.26292	0.0172553	6.31395	0.0080703	4.02573	0.0080703	0.254437	AGCUUCCAUGACUCCUGAUGGA		custom		Q86
161	Q87	3.27353	2.55201	100.607	201.161	0.00666433	0	0.00557992	5.6673	4.88249	2.53877	0.0268915	0.0268915	0.0268915	402.349	0.00666433	0.00666433	0.00666433	0.00666433	UGAAGCCAGCUCUGGUCUGGGC		custom		Q87
163	Q89	0.654167	0.974285	2.22899	3.0638	35.8062	69.1858	0.00641799	0.537267	0.00641799	2.06657	0.0175761	0.0175761	6.51394	2.36685	139.573	1.05651	2.58671	0.00886502	UCUCAGGAGUAAAGACAGAGUU		custom		Q89
165	Q90	8.36785	5.57195	105.271	3.43423	101.555	46.4588	16.5977	6.78549	5.68085	4.40737	100.287	108.078	105.979	106.74	108.415	81.2643	162.704	53.8343	AGCAGAGGCAGAGAGGCUCAGG		custom		Q90
175	rno-let-7a-1-3p	46.2992	14.7531	116.713	7.21474	206.323	20.9074	64.9193	48.2577	29.2765	42.743	126.205	118.114	112.809	109.723	226.861	219.504	198.048	180.88	CUAUACAAUCUACUGUCUUUCC	mature miRNA	standard	MIMAT0017085,MIMAT0017088	rno-let-7a-1-3p	rno-let-7a-1-3p, rno-let-7c-2-3p
176	rno-let-7a-2-3p	6.45642	5.15779	27.1058	8.68818	37.1676	5.57921	9.9657	4.63719	0.0098071	11.213	36.7469	26.6245	15.7687	29.2832	30.4919	44.0977	37.6567	36.4243	CUGUACAGCCUCCUAGCUUUCC	mature miRNA	standard	MIMAT0017086	rno-let-7a-2-3p	rno-let-7a-2-3p
182	rno-let-7d-3p	230.553	25.5257	225.123	28.8692	126.511	14.7652	244.879	226.192	196.581	254.56	253.759	241.47	188.466	216.797	138.612	133.31	105.171	128.952	CUAUACGACCUGCUGCCUUUCU	mature miRNA	standard	MIMAT0000563	rno-let-7d-3p	rno-let-7d-3p
184	rno-let-7e-3p	6.95376	5.47803	13.942	3.74297	35.0563	8.12369	0.735607	12.2005	10.8572	4.02179	11.116	18.9811	14.5963	11.0746	31.4938	46.3726	34.8654	27.4934	CUAUACGGCCUCCUAGCUUUCC	mature miRNA	standard	MIMAT0004706	rno-let-7e-3p	rno-let-7e-3p
186	rno-let-7f-1-3p	14.3314	10.6768	18.23	3.26047	37.387	25.7225	0.0101555	25.8531	15.4033	16.059	19.6182	17.3371	14.1716	21.7932	75.5102	27.4228	19.0755	27.5395	CUAUACAAUCUAUUGCCUUCC	mature miRNA	standard	MIMAT0017089	rno-let-7f-1-3p	rno-let-7f-1-3p
187	rno-let-7f-2-3p	1.83453	2.63724	18.0908	6.85373	55.5989	9.3803	0.00848572	5.6006	1.72055	0.00848572	26.9779	10.448	18.6419	16.2955	51.4578	50.0071	51.2951	69.6357	CUAUACAGUCUACUGUCUUUC	mature miRNA	standard	MIMAT0017090	rno-let-7f-2-3p	rno-let-7f-2-3p
189	rno-let-7i-3p	0.00426781	0	0.0272251	0	15.6643	28.6866	0.00426781	0.00426781	0.00426781	0.00426781	0.0272251	0.0272251	0.0272251	0.0272251	0.00860647	3.83634	0.19932	58.613	CUGCGCAAGCUACUGCCUUGCU	mature miRNA	standard	MIMAT0004707	rno-let-7i-3p	rno-let-7i-3p
193	rno-miR-7a-2-3p	815.524	128.646	1048.35	97.3954	790.694	51.9951	852.461	697.947	730.925	980.763	965.877	1007	1031.91	1188.62	804.275	722.388	788.367	847.746	CAACAAGUCCCAGUCUGCCACA	mature miRNA	standard	MIMAT0017091	rno-miR-7a-2-3p	rno-miR-7a-2-3p
196	rno-miR-9a-3p	286.855	20.9095	152.766	14.0315	236.329	24.3384	307.517	259.182	283.492	297.228	170.889	146.109	138.311	155.757	266.925	228.016	209.007	241.365	AUAAAGCUAGAUAACCGAAAGU	mature miRNA	standard	MIMAT0004708	rno-miR-9a-3p	rno-miR-9a-3p
197	rno-miR-9a-5p	160.348	8.09643	98.4512	14.729	158.182	18.6945	165.224	151.563	168.939	155.667	119.753	91.6818	95.9607	86.4087	185.059	150.748	142.065	154.857	UCUUUGGUUAUCUAGCUGUAUGA	mature miRNA	standard	MIMAT0000781	rno-miR-9a-5p	rno-miR-9a-5p
208	rno-miR-17-1-3p	62.3248	3.65978	46.0183	51.485	0.696198	1.07674	57.1373	65.1441	62.3864	64.6313	18.0146	123.134	24.2113	18.7134	0.00832839	0.493717	0.00832839	2.27442	ACUGCAGUGAAGGCACUUGUGG	mature miRNA	standard	MIMAT0004710	rno-miR-17-1-3p	rno-miR-17-1-3p
210	rno-miR-17-5p	744.287	42.2239	151.156	7.42577	52.8446	7.05261	780.61	768.718	685.742	742.078	157.867	157.16	143.471	146.127	59.8327	44.4789	49.696	57.3708	CAAAGUGCUUACAGUGCAGGUAG	mature miRNA	standard	MIMAT0000786	rno-miR-17-5p	rno-miR-17-5p
212	rno-miR-18a-5p	77.4683	8.43832	24.3005	1.54608	0.058948	0.101747	75.8139	67.0497	87.3424	79.667	22.0901	24.4221	25.5554	25.1344	0.00807473	0.211568	0.00807473	0.00807473	UAAGGUGCAUCUAGUGCAGAUAG	mature miRNA	standard	MIMAT0000787	rno-miR-18a-5p	rno-miR-18a-5p
217	rno-miR-19b-3p	358.236	8.13647	255.595	10.041	66.3	14.5658	347.743	366.768	361.841	356.592	264.248	245.054	264.111	248.965	64.7612	84.922	66.1676	49.3493	UGUGCAAAUCCAUGCAAAACUGA	mature miRNA	standard	MIMAT0000788	rno-miR-19b-3p	rno-miR-19b-3p
218	rno-miR-20a-3p	35.2725	4.1823	4.91088	2.36297	5.20622	5.34374	38.5625	29.302	35.515	37.7106	7.02389	1.52524	5.63027	5.46411	0.00823378	1.24912	10.519	9.04849	ACUGCAUUACGAGCACUUACA	mature miRNA	standard	MIMAT0000603	rno-miR-20a-3p	rno-miR-20a-3p
219	rno-miR-20a-5p	603.534	62.2972	123.208	9.17608	58.4103	5.66043	670.737	557.301	544.216	641.882	120.849	125.71	134.108	112.164	61.9081	50.105	62.1088	59.5193	UAAAGUGCUUAUAGUGCAGGUAG	mature miRNA	standard	MIMAT0000602	rno-miR-20a-5p	rno-miR-20a-5p
221	rno-miR-20b-5p	67.8936	9.86496	10.4181	3.99742	18.9504	7.15008	66.3086	55.2795	71.1518	78.8347	4.53853	11.4933	12.2408	13.3998	12.0404	13.7334	26.5751	23.4526	CAAAGUGCUCAUAGUGCAGGUAG	mature miRNA	standard	MIMAT0003211	rno-miR-20b-5p	rno-miR-20b-5p
223	rno-miR-21-5p	807.212	52.2899	700.752	71.4908	678.001	24.1684	833.679	780.35	749.184	865.636	751.171	709.477	745.225	597.134	681.887	649.322	672.971	707.825	UAGCUUAUCAGACUGAUGUUGA	mature miRNA	standard	MIMAT0000790	rno-miR-21-5p	rno-miR-21-5p
224	rno-miR-22-5p	19.8298	8.46791	67.5246	19.0732	90.4921	8.99529	7.97135	28.0334	21.1496	22.1649	85.922	71.3737	72.0637	40.7388	92.8834	100.451	89.8667	78.7677	AGUUCUUCAGUGGCAAGCUUUA	mature miRNA	standard	MIMAT0003152	rno-miR-22-5p	rno-miR-22-5p
229	rno-miR-24-1-5p	23.2818	10.7984	32.8167	2.90194	39.5137	7.74137	11.245	37.3785	23.6822	20.8214	34.0352	29.5999	31.4249	36.207	47.4936	40.7912	40.8693	28.9006	GUGCCUACUGAGCUGAUAUCAG	mature miRNA	standard	MIMAT0003153	rno-miR-24-1-5p	rno-miR-24-1-5p
230	rno-miR-24-2-5p	99.473	15.0714	89.3965	7.06217	120.694	17.3714	102.383	119.614	87.052	88.8422	96.8347	92.1978	80.1521	88.4014	121.173	131.969	133.645	95.9913	GUGCCUACUGAGCUGAAACAGU	mature miRNA	standard	MIMAT0005441	rno-miR-24-2-5p	rno-miR-24-2-5p
232	rno-miR-25-3p	1117.22	103.833	878.227	45.4842	553.796	41.2492	1244.06	1142.63	996.266	1085.9	908.417	861.317	821.984	921.189	611.542	551.056	537.465	515.121	CAUUGCACUUGUCUCGGUCUGA	mature miRNA	standard	MIMAT0000795	rno-miR-25-3p	rno-miR-25-3p
238	rno-miR-27a-3p	398.88	37.0104	603.664	58.224	1082.48	262.275	346.405	432.899	404.363	411.852	683.815	596.497	589.88	544.465	1272.92	1166.14	1195.97	694.898	UUCACAGUGGCUAAGUUCCGC	mature miRNA	standard	MIMAT0000799	rno-miR-27a-3p	rno-miR-27a-3p
240	rno-miR-27b-3p	1004.99	40.2367	1682.47	96.1154	1514.33	218.983	961.437	1055.33	987.395	1015.8	1793.91	1722.4	1640.31	1573.27	1668.67	1625.55	1571.83	1191.28	UUCACAGUGGCUAAGUUCUGC	mature miRNA	standard	MIMAT0000798	rno-miR-27b-3p	rno-miR-27b-3p
242	rno-miR-28-3p	40.7778	14.6672	47.7866	2.38658	23.0535	10.1548	31.3914	51.6871	25.2329	54.7997	48.905	44.2236	49.2862	48.7316	17.4887	24.5299	13.5251	36.6705	CACUAGAUUGUGAGCUCCUGGA	mature miRNA	standard	MIMAT0004716	rno-miR-28-3p	rno-miR-28-3p
244	rno-miR-29a-5p	7.85882	5.55301	22.4406	5.08556	76.8056	5.28103	13.4085	11.8612	3.26849	2.8971	15.6453	21.7148	27.3418	25.0606	70.0236	75.2499	81.4721	80.4766	ACUGAUUUCUUUUGGUGUUCAG	mature miRNA	standard	MIMAT0004718	rno-miR-29a-5p	rno-miR-29a-5p
246	rno-miR-29b-2-5p	19.4347	3.8453	41.5471	1.50988	52.8724	3.50858	14.0656	19.7875	20.7539	23.1316	42.5522	42.7053	39.4292	41.5017	52.0724	56.9185	48.5427	53.9558	CUGGUUUCACAUGGUGGCUUAG	mature miRNA	standard	MIMAT0004717	rno-miR-29b-2-5p	rno-miR-29b-2-5p
249	rno-miR-29c-5p	35.8435	11.8408	157.626	18.906	239.119	7.51135	33.1977	24.8021	52.6377	32.7364	168.635	170.329	161.719	129.823	250.254	236.528	235.862	233.832	UGACCGAUUUCUCCUGGUGUUC	mature miRNA	standard	MIMAT0003154	rno-miR-29c-5p	rno-miR-29c-5p
250	rno-miR-30a-3p	119.912	18.2896	94.6124	17.3019	114.271	22.36	147.334	111.003	111.287	110.022	119.805	89.3628	88.9393	80.3421	147.272	102.277	108.577	98.9568	CUUUCAGUCGGAUGUUUGCAGC	mature miRNA	standard	MIMAT0000809	rno-miR-30a-3p	rno-miR-30a-3p
252	rno-miR-30b-3p	25.1416	6.19618	14.0922	2.06305	11.7038	2.76072	33.6289	19.0738	22.6282	25.2357	16.6117	12.5242	12.2918	14.941	8.31869	12.4407	11.1102	14.9458	CUGGGAUGUGGAUGUUUACGUC	mature miRNA	standard	MIMAT0004721	rno-miR-30b-3p	rno-miR-30b-3p
255	rno-miR-30c-2-3p	13.2714	8.36545	21.501	2.9774	26.8806	5.63363	21.1453	3.74996	8.80713	19.3833	21.5544	19.4638	19.2934	25.6925	35.1269	24.1	22.6405	25.6551	CUGGGAGAAGGCUGUUUACUCU	mature miRNA	standard	MIMAT0005442	rno-miR-30c-2-3p	rno-miR-30c-2-3p
259	rno-miR-30e-3p	152.034	43.7399	120.916	18.94	302.366	36.8751	210.309	106.858	135.073	155.896	147.553	121.328	107.953	106.829	357.162	291.141	281.438	279.724	CUUUCAGUCGGAUGUUUACAGC	mature miRNA	standard	MIMAT0004720	rno-miR-30e-3p	rno-miR-30e-3p
261	rno-miR-31a-3p	50.2533	12.8224	81.2825	12.3546	105.675	5.88388	61.036	42.6515	36.1303	61.1953	98.7668	81.245	72.6409	72.4773	96.8577	108.364	108.498	108.978	UGCUAUGCCAACAUAUUGCCAUC	mature miRNA	standard	MIMAT0017102	rno-miR-31a-3p	rno-miR-31a-3p
262	rno-miR-31a-5p	1624.64	135.364	1270.72	100.368	1220.94	57.2291	1767.96	1650.07	1441.41	1639.12	1381.97	1282.57	1138.01	1280.32	1287.62	1241.41	1153.25	1201.46	AGGCAAGAUGCUGGCAUAGCUG	mature miRNA	standard	MIMAT0000810	rno-miR-31a-5p	rno-miR-31a-5p
265	rno-miR-32-5p	20.1888	7.35068	37.7723	2.50107	67.4661	24.6968	28.5487	10.6343	21.1089	20.4633	37.6281	35.7445	41.3357	36.381	82.251	77.8177	79.2713	30.5244	UAUUGCACAUUACUAAGUUGCA	mature miRNA	standard	MIMAT0000811	rno-miR-32-5p	rno-miR-32-5p
266	rno-miR-33-3p	5.91637	6.97505	24.7029	3.36297	58.4992	6.99712	15.9899	0.00948239	4.50653	3.15958	25.8014	21.7127	28.9647	22.3327	67.227	55.9598	60.1542	50.6559	CAAUGUUUCCACAGUGCAUCA	mature miRNA	standard	MIMAT0017104	rno-miR-33-3p	rno-miR-33-3p
267	rno-miR-33-5p	4.75558	5.31605	5.85162	3.70624	30.1862	8.47296	11.4123	6.63914	0.00888193	0.962041	0.723786	5.86973	7.44238	9.37057	25.7377	42.4349	29.0366	23.5356	GUGCAUUGUAGUUGCAUUGCA	mature miRNA	standard	MIMAT0000812	rno-miR-33-5p	rno-miR-33-5p
268	rno-miR-34a-5p	60.6151	11.0822	92.8793	14.192	110.289	7.77005	55.8576	76.9661	52.4465	57.1903	94.718	108.602	94.0845	74.1125	121.621	105.992	108.95	104.593	UGGCAGUGUCUUAGCUGGUUGU	mature miRNA	standard	MIMAT0000815	rno-miR-34a-5p	rno-miR-34a-5p
269	rno-miR-34b-5p	13.8397	7.28842	25.3052	5.32623	75.373	6.86022	15.4579	19.0112	17.7575	3.13217	29.7764	25.7432	17.709	27.9924	65.5666	80.0416	80.181	75.7029	AGGCAGUGUAAUUAGCUGAUUGU	mature miRNA	standard	MIMAT0000813	rno-miR-34b-5p	rno-miR-34b-5p
270	rno-miR-34c-5p	53.3884	12.7946	109.73	9.74136	104.732	7.84422	52.0586	64.7863	60.779	35.9298	113.535	109.411	119.477	96.4978	99.2681	103.656	116.132	99.8715	AGGCAGUGUAGUUAGCUGAUUGC	mature miRNA	standard	MIMAT0000814	rno-miR-34c-5p	rno-miR-34c-5p
273	rno-miR-92a-3p	525.109	34.7256	226.721	10.9399	82.7143	7.56141	541.213	479.293	519.745	560.186	233.359	210.871	234.594	228.061	93.3332	76.677	82.8545	77.9925	UAUUGCACUUGUCCCGGCCUG	mature miRNA	standard	MIMAT0000816	rno-miR-92a-3p	rno-miR-92a-3p
274	rno-miR-92b-3p	523.033	42.0872	302.019	25.8723	144.173	8.44712	562.223	472.718	504.259	552.934	325.973	296.826	317.451	267.825	153.576	137.783	149.003	136.331	UAUUGCACUCGUCCCGGCCUCC	mature miRNA	standard	MIMAT0005340	rno-miR-92b-3p	rno-miR-92b-3p
277	rno-miR-93-5p	525.971	18.6534	213.795	3.55486	87.2438	3.85014	548.21	513.071	534.326	508.278	210.589	211.188	215.295	218.106	86.8649	82.1669	91.3263	88.6171	CAAAGUGCUGUUCGUGCAGGUAG	mature miRNA	standard	MIMAT0000817	rno-miR-93-5p	rno-miR-93-5p
279	rno-miR-96-5p	351.927	13.9864	86.5352	7.61149	752.756	139.722	355.199	369.67	336.918	345.921	97.8093	84.192	82.8844	81.2551	825.148	844.407	796.177	545.292	UUUGGCACUAGCACAUUUUUGCU	mature miRNA	standard	MIMAT0000818	rno-miR-96-5p	rno-miR-96-5p
280	rno-miR-98-3p	13.9073	5.69843	21.3361	3.45007	34.0845	10.8632	20.3132	16.5435	11.4542	7.31835	20.6642	18.3599	20.0181	26.3022	24.1658	26.1587	38.9069	47.1064	CUAUACAACUUACUACUUUCC	mature miRNA	standard	MIMAT0017111	rno-miR-98-3p	rno-miR-98-3p
286	rno-miR-101a-3p	268.226	34.2578	480.098	7.83717	1067.86	56.5255	315.21	262.811	232.951	261.931	476.043	490.712	472.716	480.922	1122.22	1107.66	1038.29	1003.27	UACAGUACUGUGAUAACUGAA	mature miRNA	standard	MIMAT0000823	rno-miR-101a-3p	rno-miR-101a-3p
288	rno-miR-101b-3p	230.663	33.1037	220.358	9.68412	335.912	6.78052	274.646	223.306	194.627	230.073	219.486	234.131	211.948	215.868	343.169	329.998	340.21	330.272	UACAGUACUGUGAUAGCUGAA	mature miRNA	standard	MIMAT0000615	rno-miR-101b-3p	rno-miR-101b-3p
289	rno-miR-101b-5p	16.067	28.1761	0.0219932	0	1.91726	1.84021	5.6623	0.444291	0.00652033	58.1551	0.0219932	0.0219932	0.0219932	0.0219932	0.00697336	1.12481	2.21277	4.32447	UCGGUUAUCAUGGUACCGAUGC	mature miRNA	standard	MIMAT0017045	rno-miR-101b-5p	rno-miR-101b-5p
294	rno-miR-106b-3p	59.0396	3.57067	19.6356	2.57788	15.7293	5.11065	56.1184	64.1315	58.8003	57.1081	18.501	22.0303	21.4673	16.5438	11.7877	22.4943	11.7613	16.8737	CCGCACUGUGGGUACUUGCUGC	mature miRNA	standard	MIMAT0004727	rno-miR-106b-3p	rno-miR-106b-3p
299	rno-miR-124-3p	202.406	17.2347	92.6413	4.49423	41.381	6.13662	178.239	212.422	202.183	216.782	93.8107	96.9338	86.3128	93.5081	34.6772	37.6883	47.0005	46.1579	UAAGGCACGCGGUGAAUGCC	mature miRNA	standard	MIMAT0000828	rno-miR-124-3p	rno-miR-124-3p
301	rno-miR-125a-3p	50.2218	12.6204	81.0387	3.34376	51.3724	8.45321	61.8372	58.6216	34.2123	46.2162	80.4658	79.6105	78.2202	85.8585	57.594	44.5008	43.6902	59.7047	ACAGGUGAGGUUCUUGGGAGCC	mature miRNA	standard	MIMAT0004729	rno-miR-125a-3p	rno-miR-125a-3p
307	rno-miR-126b	12.6135	25.1081	0.0303618	0	0.00751545	0	50.2755	0.00438246	0.169821	0.00438246	0.0303618	0.0303618	0.0303618	0.0303618	0.00751545	0.00751545	0.00751545	0.00751545	UACCAAAAGUAAUAAUGUGCUG	mature miRNA	standard	MIMAT0017843	rno-miR-126b	rno-miR-126b
309	rno-miR-127-5p	144.094	26.2802	82.8087	2.41048	65.1087	16.2109	138.206	159.91	168.608	109.653	85.4946	81.1125	84.1646	80.4631	70.968	74.5253	74.0342	40.9072	CUGAAGCUCAGAGGGCUCUGAUU	mature miRNA	standard	MIMAT0017117	rno-miR-127-5p	rno-miR-127-5p
312	rno-miR-128-3p	716.309	37.7803	1003.94	44.0934	321.429	28.1364	691.524	705.299	696.091	772.324	1054.05	1016.3	997.37	948.033	346.705	310.677	341.689	286.643	UCACAGUGAACCGGUCUCUUU	mature miRNA	standard	MIMAT0000834	rno-miR-128-3p	rno-miR-128-3p
313	rno-miR-129-5p	621.351	61.1585	1007.92	57.7143	676.011	37.4287	571.504	594.767	609.026	710.108	1058.71	983.672	937.758	1051.54	620.227	689.093	695.367	699.357	CUUUUUGCGGUCUGGGCUUGC	mature miRNA	standard	MIMAT0000600	rno-miR-129-5p	rno-miR-129-5p
316	rno-miR-130b-3p	980.247	37.5271	270.144	8.865	51.1791	4.52532	1018.1	996.3	930.038	976.553	272.099	257.606	278.497	272.374	44.8938	52.0429	52.0886	55.691	CAGUGCAAUGAUGAAAGGGCAU	mature miRNA	standard	MIMAT0000837	rno-miR-130b-3p	rno-miR-130b-3p
319	rno-miR-132-5p	40.0275	6.61226	146.317	9.82235	185.764	31.9046	47.4311	31.337	40.6712	40.6707	140.19	153.219	156.029	135.832	230.676	172.878	183.124	156.377	ACCGUGGCUUUCGAUUGUUACU	mature miRNA	standard	MIMAT0017123	rno-miR-132-5p	rno-miR-132-5p
320	rno-miR-133a-3p	40.7963	7.74908	65.9145	11.0716	25.361	7.35129	38.7128	31.1539	49.3124	44.0061	80.1602	68.7719	59.6408	55.085	27.3002	24.1664	16.1382	33.839	UUUGGUCCCCUUCAACCAGCUG	mature miRNA	standard	MIMAT0000839	rno-miR-133a-3p	rno-miR-133a-3p
322	rno-miR-133b-3p	43.3478	3.70176	52.3041	8.62231	23.3293	5.29798	45.2684	43.2241	38.219	46.6796	62.975	54.4169	49.3027	42.5219	19.8747	25.0063	18.3923	30.0438	UUUGGUCCCCUUCAACCAGCUA	mature miRNA	standard	MIMAT0003126	rno-miR-133b-3p	rno-miR-133b-3p
325	rno-miR-134-3p	19.2365	6.65523	17.7927	2.90171	62.6435	65.6157	16.9211	11.9376	27.7869	20.3003	21.6561	16.9542	14.6903	17.87	160.97	33.0963	26.0479	30.4595	CUGUGGGCCACCUAGUCACCAA	mature miRNA	standard	MIMAT0017125	rno-miR-134-3p	rno-miR-134-3p
326	rno-miR-134-5p	490.881	49.7017	402.443	14.435	318.066	24.3377	546.544	426.234	488.558	502.187	419.233	399.346	384.645	406.547	353.774	301.009	304.436	313.045	UGUGACUGGUUGACCAGAGGGG	mature miRNA	standard	MIMAT0000840	rno-miR-134-5p	rno-miR-134-5p
327	rno-miR-135a-3p	54.9207	18.7886	34.4776	6.25406	21.0261	3.07134	64.0849	27.8137	57.5957	70.1883	35.9578	27.2546	42.1702	32.5279	21.202	21.8065	16.86	24.2359	UGUAGGGAUGGAAGCCAUGAAA	mature miRNA	standard	MIMAT0004732	rno-miR-135a-3p	rno-miR-135a-3p
328	rno-miR-135a-5p	20.4222	7.71262	37.2944	7.92663	602.424	320.553	27.5905	11.5937	26.1384	16.3661	48.3597	37.0456	29.9506	33.8217	156.567	847.673	823.571	581.886	UAUGGCUUUUUAUUCCUAUGUGA	mature miRNA	standard	MIMAT0000841	rno-miR-135a-5p	rno-miR-135a-5p
330	rno-miR-135b-5p	11.0211	2.81185	13.2257	2.65033	82.977	5.98288	11.321	6.973	12.5646	13.2257	15.9273	14.8054	10.0568	12.1135	89.9187	77.5289	78.4619	85.9984	UAUGGCUUUUCAUUCCUAUGUGA	mature miRNA	standard	MIMAT0000611	rno-miR-135b-5p	rno-miR-135b-5p
331	rno-miR-136-3p	207.62	20.2002	623.129	25.6659	954.249	14.9474	237.363	200.366	192.255	200.494	650.1	636.212	591.366	614.836	961.967	971.361	944.029	939.639	CAUCAUCGUCUCAAAUGAGUCU	mature miRNA	standard	MIMAT0004733	rno-miR-136-3p	rno-miR-136-3p
332	rno-miR-136-5p	0.107464	0.20375	2.41071	3.04367	65.5542	9.19635	0.00558902	0.00558902	0.00558902	0.413089	0.0172575	2.0109	0.807162	6.80752	58.7226	56.5431	73.0573	73.894	ACUCCAUUUGUUUUGAUGAUGGA	mature miRNA	standard	MIMAT0000842	rno-miR-136-5p	rno-miR-136-5p
333	rno-miR-137-3p	34.784	6.21517	86.4932	13.0261	211.965	14.7122	39.7973	28.8291	30.0181	40.4917	93.7407	100.345	80.5283	71.3587	230.342	196.387	204.865	216.268	UUAUUGCUUAAGAAUACGCGUAG	mature miRNA	standard	MIMAT0000843	rno-miR-137-3p	rno-miR-137-3p
335	rno-miR-138-1-3p	7.30386	8.20266	21.26	4.04981	56.9771	10.023	0.00981468	0.590045	12.6552	15.9604	17.9592	18.4266	21.9329	26.7214	57.0387	63.3189	42.806	64.7449	CGGCUACUUCACAACACCAGGG	mature miRNA	standard	MIMAT0004734	rno-miR-138-1-3p	rno-miR-138-1-3p
337	rno-miR-138-5p	205.885	10.8494	262.815	8.65974	348.659	193.552	204.256	208.901	192.144	218.237	265.663	264.272	250.527	270.799	428.346	455.536	451.861	58.8939	AGCUGGUGUUGUGAAUCAGGCCG	mature miRNA	standard	MIMAT0000844	rno-miR-138-5p	rno-miR-138-5p
339	rno-miR-139-5p	111.153	16.0053	85.6982	5.68462	37.599	4.67824	88.663	111.16	120.162	124.627	83.3937	92.77	87.2044	79.4248	36.8632	43.7691	37.3597	32.4039	UCUACAGUGCACGUGUCUCCAG	mature miRNA	standard	MIMAT0000845	rno-miR-139-5p	rno-miR-139-5p
341	rno-miR-140-5p	75.5324	2.98215	57.448	5.161	48.939	4.21637	72.1329	75.1442	79.401	75.4514	65.1761	55.0916	55.0821	54.4423	47.1221	43.9601	51.2996	53.3742	CAGUGGUUUUACCCUAUGGUAG	mature miRNA	standard	MIMAT0000573	rno-miR-140-5p	rno-miR-140-5p
343	rno-miR-141-5p	101.355	11.2968	105.139	4.54786	141.724	8.14915	116.56	89.885	102.05	96.9257	109.94	101.331	101.177	108.106	153.685	135.366	138.805	139.039	UCCAUCUUCCAGUGCAGUGUUG	mature miRNA	standard	MIMAT0017128	rno-miR-141-5p	rno-miR-141-5p
344	rno-miR-142-3p	2.62015	2.45003	1.26579	1.44539	31.6921	0.974261	1.62506	5.78192	3.06546	0.00813822	0.0144428	2.47266	0.0144428	2.56161	31.2335	30.9405	31.4784	33.1158	UGUAGUGUUUCCUACUUUAUGGA	mature miRNA	standard	MIMAT0000848	rno-miR-142-3p	rno-miR-142-3p
345	rno-miR-142-5p	33.9235	1.89881	33.7499	3.52088	91.7446	9.44979	36.6782	32.6186	33.6855	32.7117	35.0138	31.1955	38.1524	30.6378	91.3261	102.236	94.0203	79.3964	CAUAAAGUAGAAAGCACUACU	mature miRNA	standard	MIMAT0000847	rno-miR-142-5p	rno-miR-142-5p
346	rno-miR-143-3p	1806.12	72.6511	1496.66	29.0529	778.788	75.2345	1881.25	1750.34	1737.74	1855.15	1533.1	1464.6	1485.33	1503.6	812.221	842.18	790.195	670.556	UGAGAUGAAGCACUGUAGCUCA	mature miRNA	standard	MIMAT0000849	rno-miR-143-3p	rno-miR-143-3p
347	rno-miR-143-5p	16.0934	26.0058	0.0266422	0	0.660033	1.30686	9.89159	0.00568432	0.00568432	54.4707	0.0266422	0.0266422	0.0266422	0.0266422	0.00660315	2.62032	0.00660315	0.00660315	GGUGCAGUGCUGCAUCUCUGG	mature miRNA	standard	MIMAT0017129	rno-miR-143-5p	rno-miR-143-5p
348	rno-miR-144-3p	25.2971	15.5611	10.3341	3.67105	66.1335	6.26766	47.1108	10.2363	21.2208	22.6206	5.24618	13.5673	12.3498	10.1729	69.1375	56.7342	69.454	69.2083	UACAGUAUAGAUGAUGUACU	mature miRNA	standard	MIMAT0000850	rno-miR-144-3p	rno-miR-144-3p
349	rno-miR-144-5p	27.8879	14.8481	3.16225	3.64878	3.97061	4.15005	47.5873	13.6439	19.8895	30.4309	0.0136233	6.6887	5.93304	0.0136233	0.00804332	3.22083	2.841	9.81258	GGAUAUCAUCAUAUACUGUAAGU	mature miRNA	standard	MIMAT0017130	rno-miR-144-5p	rno-miR-144-5p
350	rno-miR-145-3p	27.4364	8.01737	16.8561	4.60191	15.2955	9.11173	39.2396	22.9428	21.9633	25.5999	16.6597	13.4964	23.4239	13.8444	18.1207	4.69574	12.1646	26.2011	GGAUUCCUGGAAAUACUGUUC	mature miRNA	standard	MIMAT0017131	rno-miR-145-3p	rno-miR-145-3p
351	rno-miR-145-5p	975.024	85.0901	1327.55	77.0285	782.874	83.0973	1035.34	911.805	892.564	1060.39	1386.99	1249.92	1273.1	1400.18	896.632	733.381	791.115	710.368	GUCCAGUUUUCCCAGGAAUCCCU	mature miRNA	standard	MIMAT0000851	rno-miR-145-5p	rno-miR-145-5p
353	rno-miR-146a-5p	726.589	43.9745	902.505	58.6056	656.59	25.7969	727.485	690.199	700.484	788.19	946.322	868.113	837.973	957.612	693.295	644.028	654.518	634.52	UGAGAACUGAAUUCCAUGGGUU	mature miRNA	standard	MIMAT0000852	rno-miR-146a-5p	rno-miR-146a-5p
355	rno-miR-146b-5p	365.017	37.3638	322.59	19.175	335.263	21.2095	334.728	349.174	356.815	419.353	339.019	300.86	312.071	338.411	354.109	353.129	317.719	316.097	UGAGAACUGAAUUCCAUAGGCUGU	mature miRNA	standard	MIMAT0005595	rno-miR-146b-5p	rno-miR-146b-5p
356	rno-miR-147	0.00428298	0	63.3209	122.127	0.297609	0.57513	0.00428298	0.00428298	0.00428298	0.00428298	246.449	0.0232464	6.78784	0.0232464	0.0100438	0.0100438	0.0100438	1.1603	GUGUGCGGAAAUGCUUCUGCUA	mature miRNA	standard	MIMAT0005297	rno-miR-147	rno-miR-147
357	rno-miR-148b-3p	757.291	463.429	1323.59	54.2648	1417.51	182.001	1030.71	918.421	1013.91	66.116	1382.74	1346.7	1255.83	1309.1	1558.44	1508.21	1450.77	1152.6	UCAGUGCAUCACAGAACUUUGU	mature miRNA	standard	MIMAT0000579	rno-miR-148b-3p	rno-miR-148b-3p
360	rno-miR-150-5p	130.792	14.8019	140.277	12.0723	125.278	23.4275	143.763	109.479	134.925	135.001	148.518	123.132	140.503	148.956	139.85	131.759	138.944	90.5586	UCUCCCAACCCUUGUACCAGUG	mature miRNA	standard	MIMAT0000853	rno-miR-150-5p	rno-miR-150-5p
361	rno-miR-151-3p	237.693	26.3288	131.773	8.69883	68.0833	5.96947	269.637	208.359	226.506	246.268	133.344	122.191	128.685	142.872	67.1085	76.6419	65.6959	62.8867	CUAGACUGAGGCUCCUUGAGG	mature miRNA	standard	MIMAT0000614	rno-miR-151-3p	rno-miR-151-3p
362	rno-miR-151-5p	1161.49	648.266	1083.68	30.8137	670.518	31.4048	1577.35	1319.12	1545.03	204.484	1127.8	1074.82	1056.02	1076.07	685.971	689.279	683.267	623.556	UCGAGGAGCUCACAGUCUAGU	mature miRNA	standard	MIMAT0000613	rno-miR-151-5p	rno-miR-151-5p
363	rno-miR-152-3p	1533.06	142.516	1019.12	46.7826	1459.31	54.2776	1522.78	1378.29	1507.77	1723.41	1074.53	964.279	1003.22	1034.46	1513.2	1408.66	1498.7	1416.69	UCAGUGCAUGACAGAACUUGG	mature miRNA	standard	MIMAT0000854	rno-miR-152-3p	rno-miR-152-3p
365	rno-miR-153-3p	379.958	27.3809	1349.04	29.9627	1988.72	15.6595	406.183	386.917	341.43	385.301	1375.15	1374.43	1327.75	1318.82	1975.79	2011.38	1981.87	1985.85	UUGCAUAGUCACAAAAGUGAUC	mature miRNA	standard	MIMAT0000855	rno-miR-153-3p	rno-miR-153-3p
366	rno-miR-153-5p	3.82001	5.59302	28.1131	4.97424	40.6918	6.84691	0.00896226	0.00896226	11.8589	3.40323	33.327	24.7347	31.3152	23.0755	32.1747	40.0649	48.8625	41.6649	GUCAUUUUUGUGAUGUUGCAGCU	mature miRNA	standard	MIMAT0017135	rno-miR-153-5p	rno-miR-153-5p
367	rno-miR-154-5p	112.765	20.092	253.233	13.355	291.078	19.6143	129.105	85.6259	126.803	109.528	264.046	262.725	235.274	250.886	318.629	272.523	284.304	288.856	UAGGUUAUCCGUGUUGCCUUCG	mature miRNA	standard	MIMAT0000856	rno-miR-154-5p	rno-miR-154-5p
371	rno-miR-181a-2-3p	28.6622	12.2817	6.73197	3.03302	0.914101	1.45438	46.0324	28.249	22.0351	18.3322	6.63047	3.91577	5.41595	10.9657	0.00813284	0.00813284	3.05751	0.582627	ACCACCAACCGUUGACUGU	mature miRNA	standard	MIMAT0017138	rno-miR-181a-2-3p	rno-miR-181a-2-3p
374	rno-miR-181c-3p	25.7441	5.69647	18.8228	5.39426	4.16704	3.07572	25.185	18.6051	32.4603	26.7258	25.1197	14.1701	21.5109	14.4903	2.35156	3.01428	2.5407	8.76163	ACCAUCGACCGUUGAGUGGACC	mature miRNA	standard	MIMAT0017137	rno-miR-181c-3p	rno-miR-181c-3p
376	rno-miR-182	1663.67	128.361	237.734	18.3888	556.44	89.3749	1688.17	1559.05	1572.05	1835.4	257.84	213.349	238.082	241.664	609.711	617.667	572.75	425.631	UUUGGCAAUGGUAGAACUCACACCG	mature miRNA	standard	MIMAT0005300	rno-miR-182	rno-miR-182
377	rno-miR-183-3p	24.8721	7.42204	3.30042	3.39415	2.06029	1.47642	22.9843	35.4994	22.8011	18.2036	0.0136109	0.730298	6.22105	6.23673	1.96663	3.04101	0.00812073	3.22538	UGAAUUACCGAAGGGCCAUAA	mature miRNA	standard	MIMAT0017141	rno-miR-183-3p	rno-miR-183-3p
379	rno-miR-184	426.078	26.5634	97.11	3.22225	20.6902	6.43324	393.069	425.143	428.044	458.055	98.1835	93.6353	95.5683	101.053	21.284	22.2299	11.9046	27.3423	UGGACGGAGAACUGAUAAGGGU	mature miRNA	standard	MIMAT0000861	rno-miR-184	rno-miR-184
381	rno-miR-185-5p	671.74	50.1504	1202.1	34.6698	804.668	29.6424	688.184	625.159	638.585	735.031	1156.43	1223.86	1194.53	1233.56	827.489	814.507	815.588	761.089	UGGAGAGAAAGGCAGUUCCUGA	mature miRNA	standard	MIMAT0000862	rno-miR-185-5p	rno-miR-185-5p
383	rno-miR-186-5p	322.956	44.149	529.679	41.9089	612.782	47.9605	379.776	334.599	280.361	297.089	578.011	525.417	538.818	476.468	684.596	589.508	591.945	585.077	CAAAGAAUUCUCCUUUUGGGCU	mature miRNA	standard	MIMAT0000863	rno-miR-186-5p	rno-miR-186-5p
384	rno-miR-187-3p	15.707	6.88495	34.4987	11.3689	51.8554	4.09976	15.8084	25.1018	8.85583	13.062	48.9351	24.8794	25.9579	38.2224	47.4231	54.388	49.4466	56.1639	UCGUGUCUUGUGUUGCAGCCGG	mature miRNA	standard	MIMAT0000864	rno-miR-187-3p	rno-miR-187-3p
395	rno-miR-192-5p	25.1767	10.4397	38.6617	2.27788	34.5799	2.29567	9.94264	30.6414	33.0025	27.1204	40.4923	38.5428	40.1228	35.489	32.6044	37.6865	33.115	34.9135	CUGACCUAUGAAUUGACAGCC	mature miRNA	standard	MIMAT0000867	rno-miR-192-5p	rno-miR-192-5p
398	rno-miR-194-5p	111.759	9.00698	163.02	4.86113	114.467	5.70368	110.958	124.383	108.443	103.251	169.99	160.892	158.857	162.341	113.918	121.892	107.986	114.073	UGUAACAGCAACUCCAUGUGGA	mature miRNA	standard	MIMAT0000869	rno-miR-194-5p	rno-miR-194-5p
403	rno-miR-196b-3p	16.6813	32.7313	0.050559	0.0469618	2.46638	4.88155	0.0051296	0.0051296	0.941091	65.7737	0.0270781	0.0270781	0.121002	0.0270781	9.78861	0.0625165	0.00719944	0.00719944	UCGACAGCACGACACUGCCUUCA	mature miRNA	standard	MIMAT0017171	rno-miR-196b-3p	rno-miR-196b-3p
406	rno-miR-199a-3p	1376.29	45.0104	356.55	17.1081	92.0086	11.3743	1403.89	1328.58	1348.67	1424.01	379.945	349.022	340.009	357.223	98.1152	83.4154	81.5494	104.954	ACAGUAGUCUGCACAUUGGUUA	mature miRNA	standard	MIMAT0004738	rno-miR-199a-3p	rno-miR-199a-3p
407	rno-miR-199a-5p	176.525	14.9851	88.8123	6.13383	33.553	4.01307	162.596	164.561	188.682	190.262	91.1885	79.7359	93.2572	91.0678	36.4198	37.3347	31.5877	28.8698	CCCAGUGUUCAGACUACCUGUUC	mature miRNA	standard	MIMAT0000872	rno-miR-199a-5p	rno-miR-199a-5p
409	rno-miR-200a-5p	43.2197	4.69339	31.4324	3.11794	25.1131	4.65652	49.7077	41.3917	43.102	38.6772	31.2525	29.8989	35.8467	28.7315	22.8207	20.3688	26.1288	31.1343	CAUCUUACCGGACAGUGCUGG	mature miRNA	standard	MIMAT0017151	rno-miR-200a-5p	rno-miR-200a-5p
411	rno-miR-200b-5p	46.2797	6.69	42.5679	4.78817	43.4217	8.94769	40.8607	41.8538	55.4947	46.9098	39.8431	40.7803	49.722	39.9263	44.3541	30.551	50.4856	48.2962	CAUCUUACUGGGCAGCAUUGGA	mature miRNA	standard	MIMAT0017152	rno-miR-200b-5p	rno-miR-200b-5p
418	rno-miR-203a-3p	117.418	16.9899	39.7764	7.2571	69.2478	3.74374	140.564	112.098	100.048	116.963	44.0765	46.3931	38.5688	30.0673	73.9894	64.8799	68.6049	69.5172	GUGAAAUGUUUAGGACCACUAG	mature miRNA	standard	MIMAT0000876	rno-miR-203a-3p	rno-miR-203a-3p
422	rno-miR-204-3p	22.8359	11.2492	36.0769	3.27303	10.0776	2.7959	22.3816	8.02882	25.7908	35.1423	38.7693	31.4571	36.1214	37.9596	6.19432	11.6118	9.97555	12.5285	GCUGGGAAGGCAAAGGGACGUU	mature miRNA	standard	MIMAT0004739	rno-miR-204-3p	rno-miR-204-3p
424	rno-miR-205	1144.28	12.8837	579.416	36.6032	389.615	17.7831	1128.21	1155.04	1139.51	1154.35	595.914	622.41	541.64	557.698	412.47	380.243	394.002	371.746	UCCUUCAUUCCACCGGAGUCUGU	mature miRNA	standard	MIMAT0000878	rno-miR-205	rno-miR-205
425	rno-miR-206-3p	4.34273	4.62604	12.2379	6.54882	27.4047	5.0789	4.54715	0.00904664	2.11478	10.7	16.6634	3.10836	11.8823	17.2977	31.4391	22.6129	23.4325	32.1343	UGGAAUGUAAGGAAGUGUGUGG	mature miRNA	standard	MIMAT0000879	rno-miR-206-3p	rno-miR-206-3p
426	rno-miR-206-5p	0.454571	0.899188	45.8009	84.4978	2.12943	3.61909	1.80335	0.00497689	0.00497689	0.00497689	9.20007	0.0190661	172.405	1.5798	0.0105386	0.867202	7.52772	0.112265	ACAUGCUUCUUUAUAUCCUCAU	mature miRNA	standard	MIMAT0017154	rno-miR-206-5p	rno-miR-206-5p
428	rno-miR-208a-3p	0.00439495	0	109.075	218.098	4.72517	2.03248	0.00439495	0.00439495	0.00439495	0.00439495	0.0262942	0.0262942	0.0262942	436.222	4.16797	5.75173	6.827	2.15399	AUAAGACGAGCAAAAAGC	mature miRNA	standard	MIMAT0000880	rno-miR-208a-3p	rno-miR-208a-3p
431	rno-miR-210-3p	177.012	18.5741	193.633	22.2192	147.464	8.68358	197.738	152.583	177.914	179.815	202.641	197.135	212.964	161.79	146.765	157.312	149.48	136.299	CUGUGCGUGUGACAGCGGCUGA	mature miRNA	standard	MIMAT0000881	rno-miR-210-3p	rno-miR-210-3p
435	rno-miR-212-3p	130.838	8.53272	400.118	36.8944	248.289	34.9205	131.959	122.598	126.525	142.269	419.849	435.45	394.152	351.023	274.548	248.337	271.349	198.923	UAACAGUCUCCAGUCACGGCCA	mature miRNA	standard	MIMAT0000883	rno-miR-212-3p	rno-miR-212-3p
436	rno-miR-212-5p	36.3016	3.4997	115.569	3.00356	88.266	3.23495	32.5591	35.2947	40.9616	36.391	114.21	116.417	119.314	112.333	85.795	87.661	92.9814	86.6266	ACCUUGGCUCUAGACUGCUUACUG	mature miRNA	standard	MIMAT0017158	rno-miR-212-5p	rno-miR-212-5p
437	rno-miR-214-3p	796.54	92.9066	340.08	11.1235	65.8726	6.32045	794.472	722.823	740.663	928.199	327.306	335.64	344.206	353.167	68.1062	56.8225	71.4852	67.0767	ACAGCAGGCACAGACAGGCAG	mature miRNA	standard	MIMAT0000885	rno-miR-214-3p	rno-miR-214-3p
442	rno-miR-216b-3p	0.169574	0.327324	14.897	3.44937	27.7572	14.2199	0.66056	0.00591223	0.00591223	0.00591223	12.9244	12.0977	19.7911	14.7748	13.2987	19.2031	33.8049	44.7223	CACACUUACUUGUAGAGAUU	mature miRNA	standard	MIMAT0017847	rno-miR-216b-3p	rno-miR-216b-3p
444	rno-miR-217-5p	2.07115	2.7339	89.5551	6.44582	67.8532	2.92783	5.77885	2.48716	0.00928766	0.00928766	94.8137	94.2169	80.9856	88.2045	65.3165	67.9389	71.9309	66.2263	UACUGCAUCAGGAACUGACUGG	mature miRNA	standard	MIMAT0000887	rno-miR-217-5p	rno-miR-217-5p
446	rno-miR-218a-5p	366.475	46.3399	167.065	33.0509	404.634	49.2267	431.297	357.756	321.24	355.609	213.59	167.691	143.936	143.041	477.809	387.72	381.326	371.681	UUGUGCUUGAUCUAACCAUGU	mature miRNA	standard	MIMAT0000888	rno-miR-218a-5p	rno-miR-218a-5p
452	rno-miR-221-3p	435.56	83.3438	848.237	76.6722	953.673	87.0781	544.886	440.486	344.263	412.605	931.725	865.336	746.395	849.492	1058.38	987.6	861.749	906.957	AGCUACAUUGUCUGCUGGGUUUC	mature miRNA	standard	MIMAT0000890	rno-miR-221-3p	rno-miR-221-3p
453	rno-miR-221-5p	0.00598407	0	13.4493	1.94179	35.6169	7.6309	0.00598407	0.00598407	0.00598407	0.00598407	11.356	15.1963	12.2409	15.0041	39.8279	40.9185	24.395	37.3261	ACCUGGCAUACAAUGUAGAUUUC	mature miRNA	standard	MIMAT0017163	rno-miR-221-5p	rno-miR-221-5p
454	rno-miR-222-3p	247.263	39.9079	752.195	52.6952	1433.27	140.606	294.656	262.697	203.201	228.497	820.66	762.497	698.069	727.555	1580.67	1468.41	1242.78	1441.23	AGCUACAUCUGGCUACUGGGU	mature miRNA	standard	MIMAT0000891	rno-miR-222-3p	rno-miR-222-3p
458	rno-miR-224-5p	273.186	24.6912	256.889	40.2156	324.788	34.1149	282.743	280.658	236.952	292.392	296.318	286.63	219.106	225.502	372.387	291.456	315.105	320.202	CAAGUCACUAGUGGUUCCGUUU	mature miRNA	standard	MIMAT0003119	rno-miR-224-5p	rno-miR-224-5p
466	rno-miR-296-3p	33.9569	9.68774	19.96	2.26561	11.1369	1.92298	32.0461	23.0953	46.6027	34.0836	17.2319	19.9543	22.7794	19.8743	9.31207	12.9296	12.6611	9.6447	GAGGGUUGGGUGGAGGCUCUCC	mature miRNA	standard	MIMAT0004742	rno-miR-296-3p	rno-miR-296-3p
467	rno-miR-296-5p	79.9818	7.28649	24.0191	3.08076	148.509	6.53634	73.6069	75.2367	81.4007	89.6828	28.5764	22.0599	23.2155	22.2247	147.626	156.637	149.076	140.698	AGGGCCCCCCCUCAAUCCUGU	mature miRNA	standard	MIMAT0000898	rno-miR-296-5p	rno-miR-296-5p
469	rno-miR-298-3p	43.0928	6.09529	45.1903	6.04199	25.5922	7.52281	40.4345	35.7315	48.0612	48.1442	53.2969	41.9533	46.0316	39.4793	27.6686	18.5579	35.2717	20.8707	AGGAACUAGCCUUCUCUCUGCU	mature miRNA	standard	MIMAT0017166	rno-miR-298-3p	rno-miR-298-3p
470	rno-miR-298-5p	31.3232	9.815	17.5428	8.3571	11.7235	5.30737	25.4392	27.5353	45.9892	26.329	18.7616	6.25309	18.7138	26.4427	4.75709	16.4116	10.4752	15.2501	GGCAGAGGAGGGCUGUUCUUCCC	mature miRNA	standard	MIMAT0000900	rno-miR-298-5p	rno-miR-298-5p
472	rno-miR-299a-5p	31.3134	4.98716	35.0046	2.62522	48.6456	7.56903	32.489	26.8792	37.855	28.0303	36.1192	34.2457	31.7613	37.8921	42.7649	58.5315	42.672	50.6141	UGGUUUACCGUCCCACAUACAU	mature miRNA	standard	MIMAT0000901	rno-miR-299a-5p	rno-miR-299a-5p
474	rno-miR-299b-5p	37.7889	7.14846	34.7559	2.08842	47.2809	8.17492	46.5089	31.8525	40.7646	32.0297	37.2296	35.2705	32.2046	34.319	56.956	41.4101	51.0875	39.67	CGGUUUACCGUCCCACAUAC	mature miRNA	standard	MIMAT0017833	rno-miR-299b-5p	rno-miR-299b-5p
475	rno-miR-300-3p	281.875	9.0215	376.83	41.0119	494.09	34.6165	284.236	270.652	280.248	292.362	413.045	397.491	377.461	319.322	498.522	525.415	507.476	444.949	UAUGCAAGGGCAAGCUCUCUUC	mature miRNA	standard	MIMAT0000902	rno-miR-300-3p	rno-miR-300-3p
477	rno-miR-301a-3p	797.233	35.0102	518.787	3.49293	416.567	22.3078	807.847	745.256	819.84	815.988	519.639	513.669	521.46	520.379	440.77	430.214	396.129	399.155	CAGUGCAAUAGUAUUGUCAAAGC	mature miRNA	standard	MIMAT0000552	rno-miR-301a-3p	rno-miR-301a-3p
479	rno-miR-301b-3p	96.7446	6.83421	41.808	9.77987	36.8113	12.2013	87.8001	95.7393	103.911	99.5283	55.4015	42.367	33.8103	35.6534	42.4851	44.7937	18.6372	41.3292	CAGUGCAAUGGUAUUGUCAAAGC	mature miRNA	standard	MIMAT0005304	rno-miR-301b-3p	rno-miR-301b-3p
482	rno-miR-322-5p	140.989	23.5678	66.309	3.58676	54.7566	3.46089	160.817	140.097	108.142	154.898	67.4112	70.9042	63.5898	63.3308	59.5406	53.8897	51.2777	54.3182	CAGCAGCAAUUCAUGUUUUGGA	mature miRNA	standard	MIMAT0001619	rno-miR-322-5p	rno-miR-322-5p
483	rno-miR-323-3p	467.874	30.3651	199.841	39.5297	194.619	24.5038	496.845	454.732	431.422	488.498	245.197	211.27	192.517	150.38	211.685	210.077	197.621	159.093	CACAUUACACGGUCGACCUCU	mature miRNA	standard	MIMAT0000550	rno-miR-323-3p	rno-miR-323-3p
484	rno-miR-323-5p	42.4557	81.5008	42.1788	80.6437	1.28866	2.56094	164.657	0.00647068	0.152151	5.00691	0.0188775	0.0188775	5.59726	163.08	0.00818663	0.00818663	0.00818663	5.13007	AGGUGGUCCGUGGCGCGUUCGC	mature miRNA	standard	MIMAT0004637	rno-miR-323-5p	rno-miR-323-5p
485	rno-miR-324-3p	162.351	7.23926	139.422	7.45727	100.023	12.4849	164.516	151.913	164.32	168.653	142.696	148.403	133.711	132.877	95.4035	106.627	113.186	84.8771	CCACUGCCCCAGGUGCUGCUGG	mature miRNA	standard	MIMAT0000554	rno-miR-324-3p	rno-miR-324-3p
486	rno-miR-324-5p	644.994	67.0256	328.165	21.4606	302.904	22.328	698.994	631.122	555.779	694.082	358.762	326.635	310.412	316.852	302.654	329.593	304.411	274.958	CGCAUCCCCUAGGGCAUUGGUGU	mature miRNA	standard	MIMAT0000553	rno-miR-324-5p	rno-miR-324-5p
487	rno-miR-325-3p	141.776	51.7502	264.197	13.8097	244.918	13.4909	213.617	122.854	91.7071	138.928	270.474	271.039	243.498	271.777	257.128	255.603	236.686	230.255	UUUAUUGAGCACCUCCUAUCAA	mature miRNA	standard	MIMAT0004639	rno-miR-325-3p	rno-miR-325-3p
488	rno-miR-325-5p	56.2552	39.093	53.1657	6.65094	71.9618	11.9566	110.469	37.9662	20.0455	56.5405	54.809	60.9659	44.9389	51.9489	80.322	81.9446	69.5394	56.0412	CCUAGUAGGUGCUCAGUAAGUGU	mature miRNA	standard	MIMAT0000557	rno-miR-325-5p	rno-miR-325-5p
489	rno-miR-326-3p	23.4246	3.93096	36.2976	3.99818	34.7179	8.47101	22.0247	23.1472	19.631	28.8953	36.8967	40.179	37.4112	30.7037	37.0358	27.3569	28.7838	45.6953	CCUCUGGGCCCUUCCUCCAGU	mature miRNA	standard	MIMAT0000560	rno-miR-326-3p	rno-miR-326-3p
492	rno-miR-328a-3p	327.533	39.9349	402.706	11.7207	263.289	37.6751	343.503	329.995	271.662	364.973	417.494	393.629	392.968	406.732	291.102	283.393	270.417	208.246	CUGGCCCUCUCUGCCCUUCCGU	mature miRNA	standard	MIMAT0000564	rno-miR-328a-3p	rno-miR-328a-3p
493	rno-miR-328a-5p	81.3721	20.0014	149.663	15.3733	208.138	48.1631	76.35	87.9843	56.8078	104.346	153.749	168.969	133.173	142.759	239.43	219.101	236.846	137.176	GGGGGGCAGGAGGGGCUCA	mature miRNA	standard	MIMAT0017029	rno-miR-328a-5p	rno-miR-328a-5p
494	rno-miR-328b-3p	9.90093	8.95365	21.9002	6.88553	39.6856	4.12342	0.00992685	12.4127	6.20354	20.9776	18.7098	22.6018	15.1302	31.1591	41.3629	44.3472	38.301	34.7311	CUGGCCCUCUCUGCCCUA	mature miRNA	standard	MIMAT0017904	rno-miR-328b-3p	rno-miR-328b-3p
495	rno-miR-329-5p	99.1999	4.04317	102.463	12.3327	109.493	4.9989	103.315	96.6982	94.8898	101.896	88.4227	113.454	95.8101	112.164	106.194	116.106	110.56	105.11	AGAGGUUUUCUGGGUCUCUGUUUC	mature miRNA	standard	MIMAT0017031	rno-miR-329-5p	rno-miR-329-5p
496	rno-miR-330-3p	33.9183	5.62103	32.7206	1.65977	22.8903	6.89733	39.3514	35.893	26.0954	34.3333	34.6981	32.2058	33.2179	30.7606	17.9899	32.0555	24.3364	17.1795	GCAAAGCACAGGGCCUGCAGAGA	mature miRNA	standard	MIMAT0000568	rno-miR-330-3p	rno-miR-330-3p
498	rno-miR-331-3p	201.154	12.8544	176.021	9.28196	126.964	30.8673	212.663	198.253	184.245	209.456	177.509	183.514	162.593	180.468	140.683	145.558	140.828	80.7884	GCCCCUGGGCCUAUCCUAGAA	mature miRNA	standard	MIMAT0000570	rno-miR-331-3p	rno-miR-331-3p
499	rno-miR-331-5p	0.726148	1.31922	100.218	200.376	1.24	2.46504	2.70036	0.00442133	0.00442133	0.19539	0.0302274	0.0302274	0.0302274	400.782	0.00748251	0.00748251	0.00748251	4.93756	GGUCUUGUUUGGGUUUGUU	mature miRNA	standard	MIMAT0017033	rno-miR-331-5p	rno-miR-331-5p
503	rno-miR-337-3p	114.139	24.476	308.109	32.0179	379.65	41.0877	146.402	119.044	90.9974	100.112	347.757	320.447	282.157	282.075	439.039	360.764	345.971	372.825	UUCAGCUCCUAUAUGAUGCCUUU	mature miRNA	standard	MIMAT0000577	rno-miR-337-3p	rno-miR-337-3p
504	rno-miR-337-5p	255.009	13.9304	246.626	18.0739	227.349	16.708	274.679	248.241	254.313	242.804	272.534	241.889	241.617	230.463	249.981	224.821	209.656	224.938	CGGCGUCAUGCAGGAGUUGAU	mature miRNA	standard	MIMAT0017035	rno-miR-337-5p	rno-miR-337-5p
505	rno-miR-338-3p	3.66238	5.05759	4.12391	2.73144	49.858	5.14374	0.00853109	10.732	3.90044	0.00853109	7.20396	5.31233	3.07904	0.90033	50.6647	42.3903	52.5666	53.8102	UCCAGCAUCAGUGAUUUUGUUGA	mature miRNA	standard	MIMAT0000581	rno-miR-338-3p	rno-miR-338-3p
506	rno-miR-339-3p	33.1688	11.3647	39.9203	6.25307	40.7324	2.00243	19.3522	46.4827	36.5176	30.3226	36.718	41.7787	47.7578	33.4267	39.3016	40.3877	39.5845	43.6557	UGAGCGCCUCGACGACAGAGCCA	mature miRNA	standard	MIMAT0004648	rno-miR-339-3p	rno-miR-339-3p
507	rno-miR-339-5p	23.2139	11.777	33.1444	5.47095	24.3301	2.24407	13.2254	16.9791	39.8652	22.7861	36.2403	30.7957	38.8705	26.671	23.7953	21.4514	26.6322	25.4414	UCCCUGUCCUCCAGGAGCUCACG	mature miRNA	standard	MIMAT0000583	rno-miR-339-5p	rno-miR-339-5p
508	rno-miR-340-3p	16.8508	8.15384	23.2085	0.987478	46.4936	6.06848	26.837	10.603	20.1636	9.79951	24.4283	22.0206	23.0794	23.3058	47.9922	51.1314	37.5989	49.2518	UCCGUCUCAGUUACUUUAUAGCC	mature miRNA	standard	MIMAT0000585	rno-miR-340-3p	rno-miR-340-3p
509	rno-miR-340-5p	391.141	25.5811	523.115	17.0919	1449.88	113.356	425.974	384.288	389.628	364.673	525.495	541.096	525.977	499.893	1604.44	1440.11	1332.31	1422.66	UUAUAAAGCAAUGAGACUGAUU	mature miRNA	standard	MIMAT0004650	rno-miR-340-5p	rno-miR-340-5p
510	rno-miR-341	91.833	13.1353	89.3904	18.3432	320.009	43.313	79.1736	94.4704	109.095	84.5929	116.261	85.345	80.2722	75.6835	384.754	299.935	293.47	301.875	UCGGUCGAUCGGUCGGUCGGU	mature miRNA	standard	MIMAT0000587	rno-miR-341	rno-miR-341
511	rno-miR-342-3p	1074.42	89.1351	905.334	33.7603	517.374	39.4167	1197.8	1079.3	996.756	1023.84	949.681	907.261	868.444	895.95	575.36	496.095	489.743	508.297	UCUCACACAGAAAUCGCACCCGU	mature miRNA	standard	MIMAT0000589	rno-miR-342-3p	rno-miR-342-3p
512	rno-miR-342-5p	26.8956	6.99649	39.2318	37.3119	14.4597	0.989801	27.5505	36.4158	20.3897	23.2263	19.6367	95.1902	20.8392	21.2612	14.7322	14.8505	15.2444	13.0118	AGGGGUGCUAUCUGUGAUUGAG	mature miRNA	standard	MIMAT0004652	rno-miR-342-5p	rno-miR-342-5p
515	rno-miR-344a-3p	101.237	16.6903	201.679	9.1539	251.721	33.6762	110.746	118.986	82.1897	93.0244	207.979	208.831	200.872	189.034	299.018	229.181	226.1	252.585	UGAUCUAGCCAAAGCCUGACCGU	mature miRNA	standard	MIMAT0000592	rno-miR-344a-3p	rno-miR-344a-3p
517	rno-miR-344b-1-3p	41.7113	5.39692	73.4167	3.69162	31.6881	2.45513	40.1537	49.7183	38.6326	38.3404	74.6327	75.0877	76.001	67.9455	31.6371	28.2335	33.474	33.4077	GAUAUAACCAAAGCCCGACUGU	mature miRNA	standard	MIMAT0017894	rno-miR-344b-1-3p	rno-miR-344b-1-3p
518	rno-miR-344b-2-3p	45.4735	1.17741	70.561	2.77887	27.5946	6.86105	47.1005	44.3971	45.5155	44.8807	73.5122	72.3356	68.464	67.9322	30.8132	27.1497	18.2448	34.1708	GGUAUAACCAAAGCCCGACUGU	mature miRNA	standard	MIMAT0017812	rno-miR-344b-2-3p	rno-miR-344b-2-3p
519	rno-miR-344b-5p	19.2981	5.00815	40.147	3.76878	20.114	5.65905	19.6619	23.6434	12.1926	21.6946	39.7421	44.623	40.7689	35.4538	19.4742	16.4238	16.251	28.307	AGUCAGGCUGCUGGUUAUAUUC	mature miRNA	standard	MIMAT0017811	rno-miR-344b-5p	rno-miR-344b-5p
522	rno-miR-345-3p	29.7198	4.63263	14.2871	6.33558	19.184	4.94476	28.9032	25.1545	36.1785	28.643	14.5912	7.35399	22.6159	12.5873	15.5727	26.3023	16.1093	18.7517	CCCUGAACUAGGGGUCUGGAGA	mature miRNA	standard	MIMAT0004655	rno-miR-345-3p	rno-miR-345-3p
523	rno-miR-345-5p	69.013	7.69595	55.8133	7.11409	67.776	6.0328	61.2881	63.8683	73.3591	77.5367	49.6472	63.4797	60.2551	49.8713	74.8924	65.4607	69.9392	60.8117	UGCUGACCCCUAGUCCAGUGC	mature miRNA	standard	MIMAT0000594	rno-miR-345-5p	rno-miR-345-5p
524	rno-miR-346	31.9737	10.4148	30.9081	4.6782	18.3089	3.02339	22.3455	24.1092	43.7083	37.7316	35.5423	25.3475	28.8384	33.9042	22.6503	16.2611	16.2263	18.0978	UGUCUGCCUGAGUGCCUGCCUCU	mature miRNA	standard	MIMAT0000596	rno-miR-346	rno-miR-346
525	rno-miR-347	80.9134	15.8108	62.3652	9.50819	24.2105	2.91756	63.4684	73.8133	100.041	86.331	61.6348	68.9083	69.7296	49.188	28.079	24.2795	23.4278	21.0556	UGUCCCUCUGGGUCGCCCA	mature miRNA	standard	MIMAT0000598	rno-miR-347	rno-miR-347
527	rno-miR-350	42.263	4.94707	49.4711	5.55506	68.4206	8.83205	37.7743	49.0099	42.7465	39.5211	54.5877	45.0765	44.2716	53.9488	71.5076	64.1431	58.8798	79.1519	UUCACAAAGCCCAUACACUUUCAC	mature miRNA	standard	MIMAT0000604	rno-miR-350	rno-miR-350
529	rno-miR-351-5p	32.8009	2.91687	7.32834	5.1963	3.05108	2.81732	31.9108	32.1644	36.9672	30.1611	1.57397	6.81286	14.203	6.72357	0.00825673	3.0863	2.31557	6.7942	UCCCUGAGGAGCCCUUUGAGCCUGA	mature miRNA	standard	MIMAT0000608	rno-miR-351-5p	rno-miR-351-5p
530	rno-miR-352	596.394	62.429	830.191	42.7355	1596	166.739	685.808	592.668	551.093	556.005	882.102	777.548	833.069	828.046	1839.85	1567.1	1490.65	1486.42	AGAGUAGUAGGUUGCAUAGUA	mature miRNA	standard	MIMAT0000610	rno-miR-352	rno-miR-352
532	rno-miR-361-5p	771.008	77.5028	585.605	13.9132	615.969	44.5946	875.008	693.179	737.869	777.977	598.014	577.217	596.792	570.399	661.693	560.257	601.967	639.958	UUAUCAGAAUCUCCAGGGGUAC	mature miRNA	standard	MIMAT0003117	rno-miR-361-5p	rno-miR-361-5p
533	rno-miR-363-5p	12.8188	3.29054	32.3735	6.28346	3.37362	3.90572	11.278	13.7278	9.32126	16.9479	41.7406	29.0307	30.1934	28.5295	0.00907878	7.22983	0.00907878	6.24648	CGGGUGGAUCACGAUGCAAUUU	mature miRNA	standard	MIMAT0003209	rno-miR-363-5p	rno-miR-363-5p
534	rno-miR-365-3p	22.9155	4.81837	12.083	4.88628	67.5546	6.38685	16.7422	27.4575	21.5426	25.9197	9.66199	18.2428	6.98604	13.4411	65.9512	76.9938	63.5956	63.6775	UAAUGCCCCUAAAAAUCCUUAU	mature miRNA	standard	MIMAT0001549	rno-miR-365-3p	rno-miR-365-3p
535	rno-miR-365-5p	27.7466	4.50293	10.8797	5.08188	7.83893	5.61245	30.1702	25.6826	22.5354	32.5982	6.53409	17.8294	7.71981	11.4355	5.86402	12.5011	0.783381	12.2072	GAGGGACUUUCAGGGGC	mature miRNA	standard	MIMAT0017184	rno-miR-365-5p	rno-miR-365-5p
536	rno-miR-369-5p	352.277	40.1205	242.481	24.8762	394.806	11.6835	395.688	341.71	301.992	369.717	272.017	245.217	241.445	211.247	411.325	386.353	394.814	386.733	AGAUCGACCGUGUUAUAUUCGC	mature miRNA	standard	MIMAT0003206	rno-miR-369-5p	rno-miR-369-5p
537	rno-miR-370-3p	61.6332	15.4342	22.173	3.25185	12.4	3.38911	76.9537	71.998	44.1739	53.407	20.7685	22.8177	26.3639	18.742	8.20944	11.2409	15.8635	14.2862	GCCUGCUGGGGUGGAACCUGGU	mature miRNA	standard	MIMAT0003122	rno-miR-370-3p	rno-miR-370-3p
539	rno-miR-374-3p	6.07614	5.07624	16.9085	3.2698	80.066	5.43622	13.2408	1.25757	4.88346	4.92267	19.689	19.1976	16.142	12.6055	82.5274	80.2342	72.4618	85.0405	CUUAGCACGUUGUAUUAUUAUU	mature miRNA	standard	MIMAT0017223	rno-miR-374-3p	rno-miR-374-3p
543	rno-miR-376a-3p	1022.9	88.464	735.639	63.5132	770.176	42.5171	1147.44	1018.07	943.302	982.808	825.632	676.399	717.044	723.483	831.026	734.934	748.696	766.049	AUCGUAGAGGAAAAUCCACGU	mature miRNA	standard	MIMAT0003198	rno-miR-376a-3p	rno-miR-376a-3p
544	rno-miR-376a-5p	112.019	16.8016	90.9366	6.2404	138.106	6.7203	131.441	118.283	106.264	92.0862	99.4961	87.6441	85.233	91.3732	147.509	132.185	138.094	134.639	GGUAGAUUCUCCUUCUAUGAG	mature miRNA	standard	MIMAT0003197	rno-miR-376a-5p	rno-miR-376a-5p
547	rno-miR-376c-5p	334.151	27.085	554.63	62.1274	1691	122.774	374.557	323.223	322.086	316.738	640.297	496.69	524.969	556.564	1835.08	1580.77	1750.67	1597.47	GUGGAUAUUCCUUCUAUGUUU	mature miRNA	standard	MIMAT0017219	rno-miR-376c-5p	rno-miR-376c-5p
548	rno-miR-377-3p	338.539	22.8369	579.858	37.1163	620.411	79.0478	371.323	333.678	330.751	318.402	629.956	540.326	573.091	576.058	663.409	639.717	674.649	503.868	UGAAUCACACAAAGGCAACUUUU	mature miRNA	standard	MIMAT0003123	rno-miR-377-3p	rno-miR-377-3p
550	rno-miR-378a-3p	376.138	19	386.6	16.6174	131.895	13.231	399.363	367.768	382.185	355.234	367.303	407.732	383.712	387.652	133.716	130.172	147.954	115.739	ACUGGACUUGGAGUCAGAAGG	mature miRNA	standard	MIMAT0003379	rno-miR-378a-3p	rno-miR-378a-3p
552	rno-miR-378b	318.302	10.6313	307.222	17.3631	100.743	10.0616	314.789	332.412	318.984	307.025	314.967	328.039	291.664	294.22	91.052	106.288	93.5847	112.048	AGUGGACUUGGAGUCAGAAGG	mature miRNA	standard	MIMAT0024855	rno-miR-378b	rno-miR-378b
553	rno-miR-379-3p	234.732	22.7219	217.283	23.5891	396.751	37.0247	254.775	252.604	223.155	208.394	248.909	208.459	193.012	218.75	450.402	369.968	374.492	392.144	CUAUGUAACAUGGUCCACUAAC	mature miRNA	standard	MIMAT0004791	rno-miR-379-3p	rno-miR-379-3p
554	rno-miR-379-5p	1814.45	141.757	1190.06	29.5881	1095.88	51.9307	1931.48	1931.59	1645.16	1749.58	1205.71	1214.78	1148.02	1191.73	1128.49	1115.25	1018.41	1121.37	UGGUAGACUAUGGAACGUAGG	mature miRNA	standard	MIMAT0003192	rno-miR-379-5p	rno-miR-379-5p
555	rno-miR-380-3p	297.254	18.9964	146.499	10.9763	148.703	9.72861	324.54	294.439	281.098	288.939	162.395	145.229	138.865	139.509	158.607	152.551	135.643	148.012	UAUGUAGUAUGGUCCACAUCU	mature miRNA	standard	MIMAT0017302	rno-miR-380-3p	rno-miR-380-3p
556	rno-miR-380-5p	51.8592	8.97532	22.5239	4.20067	24.1683	1.69654	38.5907	57.7957	54.2033	56.8472	21.3925	19.7402	28.7384	20.2245	24.6017	26.3873	22.897	22.7874	AUGGUUGACCAUAGAACAUGCG	mature miRNA	standard	MIMAT0005308	rno-miR-380-5p	rno-miR-380-5p
557	rno-miR-381-3p	275.289	9.6415	649.912	28.9897	775.496	168.538	265.599	277.741	287.648	270.169	659.228	678.819	651.638	609.964	818.729	918.249	531.387	833.617	UAUACAAGGGCAAGCUCU	mature miRNA	standard	MIMAT0003199	rno-miR-381-3p	rno-miR-381-3p
558	rno-miR-381-5p	8.36919	6.87766	15.5648	4.19134	36.2152	5.91012	0.00970571	11.3026	16.0168	6.14772	14.8594	18.3957	9.9233	19.081	36.0521	29.8671	44.1219	34.8196	AGCGAGGUUGCCCUUUGUAUAU	mature miRNA	standard	MIMAT0017220	rno-miR-381-5p	rno-miR-381-5p
559	rno-miR-382-5p	506.584	62.9389	359.977	22.4996	334.415	46.6725	576.709	539.929	439.013	470.685	382.286	346.099	335.852	375.673	393.335	350.424	296.992	296.91	GAAGUUGUUCGUGGUGGAUUCG	mature miRNA	standard	MIMAT0003201	rno-miR-382-5p	rno-miR-382-5p
564	rno-miR-409a-5p	423.158	40.6466	332.095	33.4472	379.24	28.1024	471.205	442.529	389.426	389.471	366.364	352.981	315.112	293.922	384.726	410.063	380.189	341.981	AGGUUACCCGAGCAACUUUGCAU	mature miRNA	standard	MIMAT0003204	rno-miR-409a-5p	rno-miR-409a-5p
567	rno-miR-411-3p	597.527	22.413	664.912	38.0907	745.883	166.962	607.788	623.418	573.211	585.689	705.357	673.863	613.598	666.828	853.016	859.78	767.187	503.55	UAUGUAACACGGUCCACUAA	mature miRNA	standard	MIMAT0017304	rno-miR-411-3p	rno-miR-411-3p
568	rno-miR-411-5p	739.928	99.3241	898.611	26.36	1420.72	63.6468	767.946	809.479	789.158	593.129	892.621	882.932	881.445	937.446	1479.68	1471.08	1356.96	1375.16	UAGUAGACCGUAUAGCGUACG	mature miRNA	standard	MIMAT0005312	rno-miR-411-5p	rno-miR-411-5p
569	rno-miR-412-3p	31.2144	5.33179	2.99021	5.002	4.07085	3.01199	34.1798	29.3459	36.6824	24.6494	0.880386	0.0148439	10.4738	0.591854	0.48566	7.36882	5.52688	2.90206	CUUCACCUGGUCCACUAGCCGU	mature miRNA	standard	MIMAT0003124	rno-miR-412-3p	rno-miR-412-3p
570	rno-miR-412-5p	47.4125	6.17979	10.0998	3.12227	5.1273	2.57271	46.4636	39.1932	53.4257	50.5676	6.217	8.94141	12.3747	12.8661	5.62429	1.73198	7.96951	5.18344	UGGUCGACCAGCUGGAAAGU	mature miRNA	standard	MIMAT0017204	rno-miR-412-5p	rno-miR-412-5p
571	rno-miR-421-3p	75.5743	47.1188	31.3339	1.86146	66.8187	2.35332	46.3981	43.9402	67.511	144.448	31.5281	33.6368	29.1014	31.0691	64.7707	70.202	66.3535	65.9487	AUCAACAGACAUUAAUUGGG	mature miRNA	standard	MIMAT0017175	rno-miR-421-3p	rno-miR-421-3p
574	rno-miR-423-5p	145.725	14.1196	289.301	11.2664	65.6903	6.76844	140.89	165.302	144.787	131.92	298.443	297.39	274.231	287.139	64.8857	74.0469	66.2983	57.5303	UGAGGGGCAGAGAGCGAGACUUUU	mature miRNA	standard	MIMAT0017305	rno-miR-423-5p	rno-miR-423-5p
575	rno-miR-425-3p	40.942	3.65025	47.4021	2.89256	38.4471	1.81868	38.6157	41.0298	46.0642	38.0581	48.2296	50.7028	43.7568	46.9191	37.666	40.3202	36.2874	39.5148	AUCGGGAAUAUCGUGUCCGCC	mature miRNA	standard	MIMAT0017306	rno-miR-425-3p	rno-miR-425-3p
577	rno-miR-431	1074.98	25.0858	664.669	29.6686	589.086	40.2366	1070.61	1083.54	1042.99	1102.77	685.548	649.799	630.315	693.013	615.336	612.844	598.383	529.782	UGUCUUGCAGGCCGUCAUGCA	mature miRNA	standard	MIMAT0001626	rno-miR-431	rno-miR-431
578	rno-miR-433-3p	691.339	50.7827	418.757	38.583	257.25	24.6782	712.709	643.953	655.89	752.804	395.902	386.744	419.607	472.776	257.011	231.401	250.063	290.524	AUCAUGAUGGGCUCCUCGGUGU	mature miRNA	standard	MIMAT0001628	rno-miR-433-3p	rno-miR-433-3p
579	rno-miR-433-5p	39.2608	5.44287	25.61	6.13617	36.2512	5.78667	35.964	41.4489	45.8402	33.7901	21.3409	25.3676	21.3659	34.3657	29.5401	36.1476	35.6467	43.6702	UACGGUGAGCCUGUCAUUAUUC	mature miRNA	standard	MIMAT0017192	rno-miR-433-5p	rno-miR-433-5p
581	rno-miR-434-5p	331.855	35.1917	368.683	41.4515	441.246	20.887	374.181	337.453	327.183	288.603	430.188	356.541	345.741	342.261	467.472	442.383	438.64	416.489	AGCUCGACUCAUGGUUUGAACCA	mature miRNA	standard	MIMAT0017307	rno-miR-434-5p	rno-miR-434-5p
584	rno-miR-449a-5p	84.6214	9.79813	59.2349	6.48478	3.37644	3.20759	92.0115	76.9862	75.3879	94.0999	62.3798	61.4678	63.5039	49.5883	0.00879426	2.53378	3.25094	7.71223	UGGCAGUGUAUUGUUAGCUGGU	mature miRNA	standard	MIMAT0001543	rno-miR-449a-5p	rno-miR-449a-5p
588	rno-miR-450a-5p	89.1558	16.4309	28.4719	2.93525	17.9173	4.24166	104.422	66.1987	89.8177	96.185	32.1801	25.3684	29.2376	27.1013	22.0367	12.3391	20.2	17.0935	UUUUGCGAUGUGUUCCUAAUGU	mature miRNA	standard	MIMAT0001547	rno-miR-450a-5p	rno-miR-450a-5p
590	rno-miR-455-3p	271.886	21.166	314.911	11.8541	127.893	12.4119	297.882	251.313	258.446	279.905	330.082	310.845	301.836	316.882	143.477	129.46	125.22	113.412	GCAGUCCACGGGCAUAUACACU	mature miRNA	standard	MIMAT0017308	rno-miR-455-3p	rno-miR-455-3p
596	rno-miR-466b-1-3p	37.7757	12.5444	82.5536	15.9923	43.4393	4.35677	51.415	21.0086	39.458	39.2211	105.564	76.4693	68.7281	79.453	44.5496	48.1158	43.4695	37.622	AUACAUACACACACACAUACAC	mature miRNA	standard	MIMAT0017285	rno-miR-466b-1-3p	rno-miR-466b-1-3p
598	rno-miR-466b-5p	25.8641	9.24784	52.8762	4.14375	64.5244	10.6165	31.7552	23.2284	13.9988	34.474	49.7415	51.0831	51.7118	58.9684	75.5334	65.2505	50.0677	67.2459	UAUGUGUGUGUGUAUGUCCAUG	mature miRNA	standard	MIMAT0005278	rno-miR-466b-5p	rno-miR-466b-5p
599	rno-miR-466c-3p	16.4562	3.82475	32.4019	4.97136	27.0144	2.83452	19.8931	11.8089	14.8542	19.2687	39.7859	30.8098	29.9004	29.1115	24.8853	28.9758	24.2957	29.9009	UAUACAUGCACACAUACACAC	mature miRNA	standard	MIMAT0017287	rno-miR-466c-3p	rno-miR-466c-3p
600	rno-miR-466c-5p	18.8302	7.76151	45.4695	6.32724	63.6033	3.089	29.0473	10.2302	18.7515	17.2917	43.3977	45.2691	54.1285	39.0827	67.6619	60.7581	64.2856	61.7078	UGUGAUGUGUGCAUGUACAUG	mature miRNA	standard	MIMAT0005279	rno-miR-466c-5p	rno-miR-466c-5p
606	rno-miR-485-3p	347.278	44.8946	345.223	39.5041	245.308	11.0635	390.675	285.594	346.646	366.197	392.525	348.558	343.894	295.914	259.562	233.264	241.329	247.078	CAUACACGGCUCUCCUCUCUUC	mature miRNA	standard	MIMAT0017222	rno-miR-485-3p	rno-miR-485-3p
607	rno-miR-485-5p	94.5894	11.8542	71.0674	4.16603	70.1895	3.27738	101.612	77.8358	104.157	94.753	68.5638	76.8093	67.5006	71.3959	74.8967	67.2968	69.4431	69.1213	AGAGGCUGGCCGUGAUGAAUUC	mature miRNA	standard	MIMAT0003203	rno-miR-485-5p	rno-miR-485-5p
609	rno-miR-488-3p	85.6181	9.66064	49.1784	12.7662	73.8709	1.70534	95.6665	89.5658	72.898	84.3422	51.8325	61.3005	52.4149	31.1656	73.1436	76.4189	73.112	72.809	UUGAAAGGCUGUUUCUUGGUC	mature miRNA	standard	MIMAT0005341	rno-miR-488-3p	rno-miR-488-3p
611	rno-miR-489-3p	13.875	5.21781	12.7422	3.24428	22.3157	8.05336	21.6959	11.0278	11.5213	11.255	8.83673	13.6891	16.5721	11.871	21.2924	17.6506	16.3401	33.9798	AUGACAUCACAUAUAUGGCAGC	mature miRNA	standard	MIMAT0003113	rno-miR-489-3p	rno-miR-489-3p
616	rno-miR-493-5p	68.8122	23.8392	32.3282	9.16169	46.1024	6.49834	98.8847	56.9237	44.0055	75.4347	45.6413	29.6114	24.6796	29.3805	47.4888	54.3056	38.9108	43.7042	UUGUACAUGGUAGGCUUUCAUU	mature miRNA	standard	MIMAT0017217	rno-miR-493-5p	rno-miR-493-5p
617	rno-miR-494-3p	120.004	29.4189	181.765	21.5127	100.517	12.9014	153.012	130.254	83.1073	113.645	209.632	187.291	168.512	161.625	103.421	106.92	110.122	81.6053	UGAAACAUACACGGGAAACCUCU	mature miRNA	standard	MIMAT0003193	rno-miR-494-3p	rno-miR-494-3p
618	rno-miR-494-5p	1.88236	2.50095	12.0659	9.28434	43.3161	7.81946	0.00847436	5.29223	0.00847436	2.22025	21.019	18.705	6.79945	1.73995	53.8611	36.3183	44.4559	38.6291	AGGUUGUCCGUGUUGUCUUCUC	mature miRNA	standard	MIMAT0017218	rno-miR-494-5p	rno-miR-494-5p
619	rno-miR-496-3p	262.616	32.5862	98.1755	12.7272	115.999	65.9419	305.447	256.882	226.317	261.818	111.302	80.7664	101.152	99.4817	17.1133	151.139	147.744	148	AGUAUUACAUGGCCAAUCUCC	mature miRNA	standard	MIMAT0012860	rno-miR-496-3p	rno-miR-496-3p
621	rno-miR-497-3p	14.9914	25.5854	0.286348	0.518787	1.96517	3.91697	53.059	6.89535	0.00555386	0.00555386	0.0269549	0.0269549	0.0269549	1.06453	0.00667987	7.84062	0.00667987	0.00667987	CCAAACCACACUGUGGUGUUAGA	mature miRNA	standard	MIMAT0017230	rno-miR-497-3p	rno-miR-497-3p
622	rno-miR-497-5p	81.2356	15.5245	182.76	11.0222	157.383	29.316	89.5595	98.832	70.2981	66.2529	189.846	194.458	172.652	174.085	178.409	113.969	169.189	167.967	CAGCAGCACACUGUGGUUUGUA	mature miRNA	standard	MIMAT0003383	rno-miR-497-5p	rno-miR-497-5p
623	rno-miR-499-5p	54.8752	11.6864	70.0863	7.95752	225.989	26.4822	61.9596	65.5672	52.5904	39.3838	70.9988	79.8206	69.1044	60.4212	249.959	240.666	189.826	223.505	UUAAGACUUGCAGUGAUGUUU	mature miRNA	standard	MIMAT0003381	rno-miR-499-5p	rno-miR-499-5p
624	rno-miR-503-3p	10.2326	3.56287	36.5253	70.2497	1.2149	1.45407	5.47382	13.4967	9.62612	12.3336	0.0150982	141.858	0.0150982	4.21311	0.00806761	1.91323	2.93024	0.00806761	GGAGUAUUGUUUCCGCUGCCUGG	mature miRNA	standard	MIMAT0017224	rno-miR-503-3p	rno-miR-503-3p
625	rno-miR-503-5p	35.2243	9.30683	14.11	6.00813	3.81881	5.51309	21.8235	38.4837	43.3135	37.2767	12.5013	22.1908	7.75454	13.9935	0.00842575	2.51258	11.9389	0.815306	UAGCAGCGGGAACAGUACUGCAG	mature miRNA	standard	MIMAT0003213	rno-miR-503-5p	rno-miR-503-5p
627	rno-miR-505-3p	116.535	8.66497	105.907	16.5107	94.0892	7.34919	106.626	124.397	111.94	123.179	121.391	118.783	93.9702	89.4823	92.6119	94.3819	85.7634	103.599	GUCAACACUUGCUGGUUUCC	mature miRNA	standard	MIMAT0003380	rno-miR-505-3p	rno-miR-505-3p
628	rno-miR-505-5p	28.9675	4.00035	21.3749	4.13552	4.57514	6.12843	24.6228	26.5205	32.1628	32.5639	16.8367	21.256	20.5526	26.8541	0.958939	0.58194	3.15017	13.6095	GGGAGCCAGGAAGUAUUGAUGUU	mature miRNA	standard	MIMAT0017226	rno-miR-505-5p	rno-miR-505-5p
632	rno-miR-532-3p	26.1086	8.04759	40.1042	6.02917	11.8032	5.93759	37.9353	22.8235	19.9471	23.7284	31.2497	42.6786	41.7772	44.7113	9.67914	18.5756	14.2004	4.75753	CCUCCCACACCCAAGGCUUGCA	mature miRNA	standard	MIMAT0005323	rno-miR-532-3p	rno-miR-532-3p
633	rno-miR-532-5p	131.835	5.68976	77.7832	11.3385	25.4444	8.51735	133.225	135.383	123.433	135.299	89.4465	85.1167	65.507	71.0627	15.8865	34.8698	21.1842	29.837	CAUGCCUUGAGUGUAGGACUGU	mature miRNA	standard	MIMAT0005322	rno-miR-532-5p	rno-miR-532-5p
634	rno-miR-539-3p	223.967	22.5327	301.893	12.2261	636.185	57.2652	250.435	222.59	195.516	227.326	316.137	301.192	286.365	303.878	691.83	638.59	556.907	657.415	CAUACAAGGGUAAUUUCUUUUC	mature miRNA	standard	MIMAT0017212	rno-miR-539-3p	rno-miR-539-3p
635	rno-miR-539-5p	1467.3	105.704	953.949	43.8779	1334.12	83.8839	1582.44	1436.15	1336.52	1514.09	988.809	986.885	895.785	944.316	1367.12	1402.36	1211.95	1355.04	GGAGAAAUUAUCCUUGGUGUGU	mature miRNA	standard	MIMAT0003176	rno-miR-539-5p	rno-miR-539-5p
636	rno-miR-540-3p	43.5883	3.43767	59.1292	3.95899	32.2972	2.01721	44.5385	45.6267	45.6945	38.4933	61.0793	59.3968	53.51	62.5308	33.336	34.5899	31.0331	30.2298	AGGUCAGAGGUCGAUCCUGGGC	mature miRNA	standard	MIMAT0003174	rno-miR-540-3p	rno-miR-540-3p
638	rno-miR-541-3p	63.8595	4.19887	51.4671	4.83734	47.9802	12.8431	60.4203	69.8875	61.7356	63.3947	54.0206	48.5333	56.9012	46.4132	56.2143	52.5215	54.3363	28.8488	AGUGGCGAACACAGAAUCCAUAC	mature miRNA	standard	MIMAT0017213	rno-miR-541-3p	rno-miR-541-3p
643	rno-miR-547-3p	2.6282	4.06658	91.3053	182.567	5.38175	3.24451	0.00626421	1.92499	8.57527	0.00626421	0.0218898	365.156	0.0218898	0.0218898	7.7263	2.84536	2.34463	8.61072	AUUGGUACUUCUUUAAGUGAGA	mature miRNA	standard	MIMAT0012851	rno-miR-547-3p	rno-miR-547-3p
645	rno-miR-551b-3p	181.698	12.4586	751.846	30.7524	1126.92	194.051	172.685	198.722	172.102	183.283	786.566	768.429	721.687	730.701	1247	1258.75	1158.19	843.743	GGCGACCCAUACUUGGUUUCAGU	mature miRNA	standard	MIMAT0005596	rno-miR-551b-3p	rno-miR-551b-3p
648	rno-miR-582-5p	33.1847	6.39097	34.1694	4.51533	57.685	6.08167	25.5103	41.1588	32.9816	33.088	40.0239	34.7578	29.2468	32.6489	65.0085	55.3014	50.7741	59.6558	UACAGUUGUUCAACCAGUUACU	mature miRNA	standard	MIMAT0012833	rno-miR-582-5p	rno-miR-582-5p
649	rno-miR-592	37.1645	3.15538	14.6811	3.03992	12.8526	5.06822	37.7103	38.2061	40.0604	32.6812	16.0026	10.1774	15.7108	16.8335	8.18474	16.7531	8.77749	17.6952	AUUGUGUCAAUAUGCGAUGAUGU	mature miRNA	standard	MIMAT0012834	rno-miR-592	rno-miR-592
650	rno-miR-598-3p	96.4544	2.61135	171.407	25.7899	237.872	30.3421	99.534	97.302	93.3631	95.6184	206.919	170.002	163.034	145.674	236.601	260.624	195.414	258.848	UACGUCAUCGUCGUCAUCGUUA	mature miRNA	standard	MIMAT0005325	rno-miR-598-3p	rno-miR-598-3p
655	rno-miR-653-3p	17.4731	6.9263	9.30318	7.25761	60.6994	5.81523	17.904	25.1867	18.454	8.34767	7.83657	0.615822	10.5824	18.1779	55.3794	68.9112	60.129	58.3778	UUCACUGGGGUUUGUUUCACUA	mature miRNA	standard	MIMAT0017361	rno-miR-653-3p	rno-miR-653-3p
658	rno-miR-664-2-5p	13.2262	5.73586	10.2891	6.58964	34.1615	7.13776	6.93111	9.89495	17.1329	18.9457	13.1693	14.69	0.480127	12.8171	41.7241	25.6664	38.0223	31.233	CUGGCUGGGGAAAAUGAUUGG	mature miRNA	standard	MIMAT0017229	rno-miR-664-2-5p	rno-miR-664-2-5p
659	rno-miR-664-3p	53.1597	48.1906	121.197	11.9894	491.782	29.9113	125.378	27.3358	32.0111	27.9137	129.86	128.265	122.884	103.779	527.529	482.527	500.553	456.518	UAUUCAUUUACUCCCCAGCCUA	mature miRNA	standard	MIMAT0003382	rno-miR-664-3p	rno-miR-664-3p
660	rno-miR-665	177.401	15.9906	172.169	11.4066	75.7149	11.1775	184.22	175.16	156.336	193.889	185.031	173.947	157.28	172.415	64.3883	77.2871	90.5035	70.6806	ACCAGGAGGCUGAGGUCCCUUA	mature miRNA	standard	MIMAT0012844	rno-miR-665	rno-miR-665
663	rno-miR-667-3p	241.187	44.4956	192.572	10.6238	157.196	27.0259	292.75	197.45	211.417	263.133	198.288	192.661	177.648	201.693	193.122	136.848	135.895	162.919	UGACACCUGCCACCCAGCCCAA	mature miRNA	standard	MIMAT0012852	rno-miR-667-3p	rno-miR-667-3p
665	rno-miR-668	170.475	26.7683	178.263	11.0145	29.9047	17.5218	209.768	157.944	150.366	163.82	176.484	190.9	181.263	164.403	7.43816	33.5488	49.943	28.6889	UGUCACUCGGCUCGGCCCACUACC	mature miRNA	standard	MIMAT0012839	rno-miR-668	rno-miR-668
666	rno-miR-671	10.8816	8.33186	12.3016	10.438	13.6078	14.1092	5.60081	21.4289	2.99196	13.5048	24.937	9.29063	14.9668	0.0120909	9.06927	0.00883242	12.0185	33.3346	UCCGGUUCUCAGGGCUCCACC	mature miRNA	standard	MIMAT0005326	rno-miR-671	rno-miR-671
667	rno-miR-672-5p	97.868	25.6146	121.28	16.2907	142.041	15.5193	129.574	99.8446	67.0288	95.0245	139.188	128.363	116.3	101.268	158.07	149.726	122.266	138.102	UGAGGUUGGUGUACUGUGUGUGA	mature miRNA	standard	MIMAT0005327	rno-miR-672-5p	rno-miR-672-5p
670	rno-miR-674-3p	28.1805	10.3748	25.4691	5.7447	7.15226	4.22965	41.9855	29.3477	17.6218	23.7669	33.9407	23.5129	21.1665	23.2561	5.61698	2.37237	12.3744	8.24527	CACAGCUCCCAUCUCAGAACAA	mature miRNA	standard	MIMAT0005330	rno-miR-674-3p	rno-miR-674-3p
671	rno-miR-674-5p	65.4387	4.96225	64.8161	18.674	31.4189	2.51807	67.4293	62.0663	60.7639	71.4954	91.8986	62.0899	54.7163	50.5595	32.9798	28.8459	29.7509	34.0991	GCACUGAGAUGGGAGUGGUGUA	mature miRNA	standard	MIMAT0005329	rno-miR-674-5p	rno-miR-674-5p
677	rno-miR-702-5p	2.11533	2.4356	1.5114	2.98021	16.5388	25.8262	0.0065972	0.0065972	4.15554	4.2926	0.0212909	0.0212909	0.0212909	5.98171	55.0058	0.00711945	7.49431	3.64805	GUGAGUGGGGUGGUUGGCAUG	mature miRNA	standard	MIMAT0017884	rno-miR-702-5p	rno-miR-702-5p
678	rno-miR-708-3p	27.129	6.98862	15.0712	4.04451	15.0056	5.3474	22.037	36.2977	21.3344	28.8468	15.6981	9.37797	16.2938	18.9148	13.0898	8.49049	20.6574	17.7848	CAACUAGACUGUGAGCUUCUAG	mature miRNA	standard	MIMAT0005332	rno-miR-708-3p	rno-miR-708-3p
684	rno-miR-743a-5p	14.3597	28.7092	3.96194	5.34877	2.23191	1.69646	0.0050865	0.0050865	0.0050865	57.4234	11.3431	0.01909	0.01909	4.4665	3.96689	0.0102985	3.009	1.94145	UAUUCAGAUUGGUGCCUGUCAU	mature miRNA	standard	MIMAT0017315	rno-miR-743a-5p	rno-miR-743a-5p
685	rno-miR-743b-3p	13.0418	26.0756	0.0292809	0	1.0464	1.70078	0.00401358	0.00401358	0.00401358	52.1553	0.0292809	0.0292809	0.0292809	0.0292809	0.00850911	0.00850911	3.56231	0.606285	GAAAGACACCAUACUGAAUAGA	mature miRNA	standard	MIMAT0005280	rno-miR-743b-3p	rno-miR-743b-3p
686	rno-miR-743b-5p	0.00356758	0	5.10647	10.1456	20.5803	41.1439	0.00356758	0.00356758	0.00356758	0.00356758	0.033668	0.033668	20.3249	0.033668	0.00832547	0.00832547	0.00832547	82.2962	UGUUCAGACUGGUGUCCAUCAU	mature miRNA	standard	MIMAT0017288	rno-miR-743b-5p	rno-miR-743b-5p
687	rno-miR-758-3p	55.6675	4.29618	35.3105	1.56974	32.4373	3.87009	55.9033	49.8409	56.7691	60.1567	33.6702	35.426	34.7451	37.4007	36.3387	35.137	28.5726	29.701	UUUGUGACCUGGUCCACUAACC	mature miRNA	standard	MIMAT0005335	rno-miR-758-3p	rno-miR-758-3p
695	rno-miR-770-3p	53.8623	12.0994	22.3792	2.56021	26.114	7.04115	68.5595	45.8449	42.2583	58.7865	19.308	21.4297	23.5999	25.1792	28.4763	15.6213	30.1385	30.22	GUGGGCCUGACGUGGAG	mature miRNA	standard	MIMAT0017317	rno-miR-770-3p	rno-miR-770-3p
698	rno-miR-802-5p	0.90582	0.799554	10.1039	3.10885	64.4445	4.98354	0.812569	1.95478	0.847583	0.00834753	13.5917	11.8364	7.8114	7.17592	70.5667	59.5618	61.3331	66.3164	UCAGUAACAAAGAUUCAUCCU	mature miRNA	standard	MIMAT0012840	rno-miR-802-5p	rno-miR-802-5p
701	rno-miR-872-3p	57.3893	8.02411	74.1642	4.64064	80.5327	12.978	65.206	53.286	62.8923	48.1731	78.6841	69.5246	77.589	70.8593	97.8411	66.3898	79.5296	78.3702	UGAACUAUUGCAGUAGCCUCCU	mature miRNA	standard	MIMAT0005283	rno-miR-872-3p	rno-miR-872-3p
708	rno-miR-877	27.0529	5.89696	22.9235	0.96973	14.9441	3.47072	27.8459	33.501	19.1957	27.6689	24.3028	22.4222	22.8598	22.1091	14.1898	13.1304	12.4213	20.0348	GUAGAGGAGAUGGCGCAGGG	mature miRNA	standard	MIMAT0005285	rno-miR-877	rno-miR-877
710	rno-miR-879-3p	24.2841	9.07256	62.0216	3.85609	80.6749	4.87661	32.8916	29.2277	22.8278	12.1892	58.7588	58.7902	66.3715	64.1661	86.9604	75.0853	79.9086	80.7453	CUUAUGGCUUCAAGCUUUCGG	mature miRNA	standard	MIMAT0017291	rno-miR-879-3p	rno-miR-879-3p
711	rno-miR-879-5p	50.7518	3.24958	39.7731	5.03195	55.1159	10.8091	46.7971	54.0977	52.5825	49.5298	38.4728	39.7476	46.4938	34.3785	65.9253	40.6956	60.0199	53.823	AGAGGCUUAUAGCUCUAAGCC	mature miRNA	standard	MIMAT0005287	rno-miR-879-5p	rno-miR-879-5p
720	rno-miR-1188-5p	34.2907	16.2361	8.92348	6.89651	44.8364	6.69626	27.1141	53.9558	39.7646	16.3283	17.6654	10.69	1.67818	5.66027	54.298	43.1548	38.5066	43.3861	UGGUGUGAGGUUGGGCCAGGA	mature miRNA	standard	MIMAT0017854	rno-miR-1188-5p	rno-miR-1188-5p
721	rno-miR-1193-3p	58.1886	3.55092	71.4643	11.1987	69.0967	8.34382	60.1858	59.0001	52.9609	60.6074	85.3502	73.3045	58.292	68.9104	74.8568	59.092	65.4495	76.9887	UAGGUCACCCGUUUUACUAUCC	mature miRNA	standard	MIMAT0017859	rno-miR-1193-3p	rno-miR-1193-3p
725	rno-miR-1224	43.9101	15.7757	49.1057	5.34646	62.5487	12.048	26.4272	36.7382	62.7797	49.6952	55.1101	42.175	48.782	50.3556	65.9611	55.4452	50.8565	77.9321	GUGAGGACUGGGGAGGUGGAG	mature miRNA	standard	MIMAT0012827	rno-miR-1224	rno-miR-1224
729	rno-miR-1306-5p	33.1036	6.35279	28.3933	3.33521	7.20669	4.7535	31.3814	31.7484	42.11	27.1744	25.4617	32.2829	25.7709	30.0579	1.161	8.51362	6.55108	12.601	CCACCUCCCCUGCAAACGUCCA	mature miRNA	standard	MIMAT0024851	rno-miR-1306-5p	rno-miR-1306-5p
730	rno-miR-1839-3p	67.3963	14.9003	65.6741	7.25965	154.838	6.92196	65.1935	65.3546	51.5181	87.5188	71.2599	56.2905	63.5953	71.5506	155.98	149.948	149.246	164.179	AGACCUACUUAUCUACCAACAG	mature miRNA	standard	MIMAT0024844	rno-miR-1839-3p	rno-miR-1839-3p
731	rno-miR-1843-3p	31.9413	13.8943	70.3003	1.65431	61.3993	5.38688	51.6438	31.1828	20.1292	24.8094	69.4245	72.7282	69.1095	69.939	66.0782	53.8497	61.4121	64.2571	UCUGAUCGUUCACCUCCAUACA	mature miRNA	standard	MIMAT0024848	rno-miR-1843-3p	rno-miR-1843-3p
732	rno-miR-1843-5p	41.8249	8.42645	57.413	3.96886	136.823	6.18337	49.0137	49.0376	36.2999	32.9486	56.6574	58.1954	62.1992	52.6	133.135	137.202	145.387	131.568	UAUGGAGGUCUCUGUCUGACU	mature miRNA	standard	MIMAT0024847	rno-miR-1843-5p	rno-miR-1843-5p
739	rno-miR-3068-3p	96.7863	10.2459	122.712	9.61651	158.379	8.78088	111.101	96.918	91.2475	87.8791	128.561	128.652	125.139	108.497	170.217	158.654	155.304	149.343	GGUGAAUUGCAGUACUCCAACA	mature miRNA	standard	MIMAT0024846	rno-miR-3068-3p	rno-miR-3068-3p
740	rno-miR-3068-5p	74.817	9.1303	141.757	5.63737	260.506	11.2447	76.6175	86.687	70.4823	65.4812	144.043	141.621	147.307	134.057	276.927	258.504	254.22	252.372	UUGGAGUUCAUGCAAGUUCUAACCA	mature miRNA	standard	MIMAT0024845	rno-miR-3068-5p	rno-miR-3068-5p
741	rno-miR-3072	45.0815	14.0519	16.2285	2.28385	17.797	2.73185	50.7783	54.6355	50.729	24.1831	18.9014	17.0391	15.4299	13.5436	14.8819	17.3997	17.4222	21.4839	UGCCCCCUCCAGGAAGCCUUCUU	mature miRNA	standard	MIMAT0025071	rno-miR-3072	rno-miR-3072
745	rno-miR-3099	206.475	39.025	249.115	28.4881	139.4	19.2312	263.43	194.926	174.806	192.74	285.926	225.957	227.285	257.291	166.523	125.332	126.137	139.606	UAGGCUAGAAAGAGGUUGGGGA	mature miRNA	standard	MIMAT0025048	rno-miR-3099	rno-miR-3099
746	rno-miR-3102	0.408855	0.806308	37.6929	53.5187	10.4702	9.98001	0.00570144	0.00570144	0.00570144	1.61832	6.16272	117.797	12.3408	14.4715	0.0111764	22.8987	13.5477	5.42319	CUCUACUCCCUGCCCCAGCCA	mature miRNA	standard	MIMAT0025051	rno-miR-3102	rno-miR-3102
748	rno-miR-3473	1773.9	14.2733	570.704	20.2166	935.581	57.3666	1753.21	1776.17	1785.14	1781.08	547.398	596.555	571.823	567.038	968.454	975.421	946.981	851.468	UCUAGGGCUGGAGAGAUGGCUA	mature miRNA	standard	MIMAT0024853	rno-miR-3473	rno-miR-3473
752	rno-miR-3547	47.9962	13.6502	37.0433	4.62482	56.2627	7.12227	67.8755	36.8856	42.6353	44.5885	38.1455	40.0883	30.2221	39.7173	59.0042	51.2087	65.0494	49.7885	UGAGCACCACCCCUCUCUCAGAU	mature miRNA	standard	MIMAT0017802	rno-miR-3547	rno-miR-3547
756	rno-miR-3551-3p	0.268114	0.529092	79.0753	158.083	1.5588	3.10094	0.00356758	0.00356758	1.06175	0.00356758	0.033668	316.2	0.033668	0.033668	0.00832547	0.00832547	6.21021	0.00832547	UGAAAUUCACCAUGGUGGGUAAA	mature miRNA	standard	MIMAT0017810	rno-miR-3551-3p	rno-miR-3551-3p
764	rno-miR-3558-5p	11.2675	20.1018	0.0274893	0	0.979868	1.94611	0.00534103	0.00534103	3.75589	41.3033	0.0274893	0.0274893	0.0274893	0.0274893	0.00681101	0.00681101	0.00681101	3.89904	CCAUAGAAGUCAUCCCACAGUGCC	mature miRNA	standard	MIMAT0017825	rno-miR-3558-5p	rno-miR-3558-5p
766	rno-miR-3559-5p	117.071	9.99651	194.648	19.8707	324.607	155.596	127.36	113.213	104.957	122.753	218.544	191.039	170.457	198.552	418.918	93.462	371.279	414.769	UGACAGACUUAGUACUACAUGA	mature miRNA	standard	MIMAT0017827	rno-miR-3559-5p	rno-miR-3559-5p
767	rno-miR-3560	0.478753	0.948698	63.1486	117.214	0.0103352	0	0.00440397	0.00440397	1.9018	0.00440397	0.0219703	2.11635	11.6501	238.806	0.0103352	0.0103352	0.0103352	0.0103352	CAAAUCCUUGCCCGGGUGCAUU	mature miRNA	standard	MIMAT0017829	rno-miR-3560	rno-miR-3560
774	rno-miR-3569	15.3768	27.9608	3.65688	3.06133	10.3819	20.7471	57.2421	0.0064454	0.472729	3.78606	3.53601	0.0186566	7.51108	3.56176	0.00831605	0.00831605	0.00831605	41.5025	GGAGGACAGCAGACUCAGGUC	mature miRNA	standard	MIMAT0017849	rno-miR-3569	rno-miR-3569
775	rno-miR-3570	15.3908	27.8134	0.0226153	0	33.8535	66.3372	0.00630435	0.00630435	4.5644	56.9862	0.0226153	0.0226153	0.0226153	0.0226153	0.00701386	0.00701386	2.05108	133.349	GGUACAAUCAACGGUCGAUGGU	mature miRNA	standard	MIMAT0017850	rno-miR-3570	rno-miR-3570
778	rno-miR-3573-3p	2.47176	2.4379	2.61014	3.82657	21.9358	39.3696	0.00747267	1.95943	5.83952	2.08063	0.0159813	2.28804	0.0159813	8.12058	2.62909	80.9338	4.17177	0.00837358	UUCCUAACUCUGCCCCCUCCCAU	mature miRNA	standard	MIMAT0017857	rno-miR-3573-3p	rno-miR-3573-3p
789	rno-miR-3584-3p	0.272951	0.482452	0.0309795	0	10.6801	21.3448	0.0892572	0.00421025	0.00421025	0.994126	0.0309795	0.0309795	0.0309795	0.0309795	0.00766686	0.00766686	42.6972	0.00766686	GCCCGCAUCUCUGGAUCCC	mature miRNA	standard	MIMAT0017876	rno-miR-3584-3p	rno-miR-3584-3p
790	rno-miR-3584-5p	7.61036	6.10046	23.6001	5.35227	58.472	9.67484	12.1957	12.8803	0.0101082	5.35531	17.2836	28.9516	21.1725	26.9927	59.0416	71.9351	50.8338	52.0777	GGGAGGAGUCCAGGAGGC	mature miRNA	standard	MIMAT0017875	rno-miR-3584-5p	rno-miR-3584-5p
806	rno-miR-6215	136.738	15.8573	67.5539	5.43767	355.435	26.0984	127.737	124.06	159.36	135.797	64.756	68.2037	74.8788	62.377	382.728	350.65	366.79	321.573	UUUAGGGUUGCAGAGCCAGG	mature miRNA	standard	MIMAT0024854	rno-miR-6215	rno-miR-6215
823	rno-miR-6331	34.0915	3.57402	24.8466	5.66255	41.456	6.60669	29.5138	38.245	34.4123	34.1946	28.2821	21.6341	30.8198	18.6505	34.1465	45.9118	37.7063	48.0592	CUUUGGUGGCUUAGUUCUUUGUGC	mature miRNA	standard	MIMAT0025070	rno-miR-6331	rno-miR-6331
827	rno-miR-7578	0.747063	0.928946	1.04623	1.19858	39.4664	68.6851	0.00689943	1.93301	0.00689943	1.04144	0.0166687	0.0166687	2.26257	1.88903	5.12906	3.87737	6.37658	142.483	CGUGGCUCGUCUUCUGCCUCAGA	mature miRNA	standard	MIMAT0029579	rno-miR-7578	rno-miR-7578
