# Supplementary material for: Age-Related Changes in MicroRNA in the Rat Pituitary and Potential Role in GH Regulation
Source: Int J Mol Sci. 2018 Jul 15;19(7):2058. doi: 10.3390/ijms19072058 (PMC6073141; doi:10.3390/ijms19072058)
Supplement: Supplementary file 1 [file ijms-19-02058-s001.zip › supplementary files/Table S2.xlsx]

## Sheet: Table S2
Table S2. Predicted targets for the differentially expressed miRNAs
Reporter Name	Source	Confidence	Symbol	Entrez Gene Name	Disease	Location	Molecule Type	Pathway	Species	Tissue/Cell Line
rno-miR-99b-5p	TargetScan Human	High (predicted)	AGO2	argonaute RISC catalytic component 2	Cancer,Cardiovascular Disease,Connective Tissue Disorders,Developmental Disorder,Gastrointestinal Disease,Hepatic System Disease,Infectious Disease,Inflammatory Disease,Inflammatory Response,Organismal Injury and Abnormalities,Reproductive System Disease,Respiratory Disease	Cytoplasm	translation regulator	EIF2 Signaling,Regulation of eIF4 and p70S6K Signaling	Human,Mouse,Rat	Activated CD56bright NK cells,Activated CD56dim NK cells,Activated helper T cells,Activated Vd1 Gamma-delta T cells,Activated Vd2 Gamma-delta T cells,Adipose,Amygdala,B lymphocytes not otherwise specified,BDCA-1+ dendritic cells,BDCA-3+ dendritic cells,Bladder,Central memory cytotoxic T cells,Cerebellum,Cerebral Cortex,Cytotoxic T cells,Dorsal Root Ganglion,Effector memory cytotoxic T cells,Effec…
rno-miR-99b-5p	TargetScan Human	Moderate (predicted)	ANTXR1	anthrax toxin receptor 1	Cancer,Cardiovascular Disease,Connective Tissue Disorders,Dental Disease,Dermatological Diseases and Conditions,Developmental Disorder,Gastrointestinal Disease,Hematological Disease,Hereditary Disorder,Immunological Disease,Inflammatory Disease,Neurological Disease,Ophthalmic Disease,Organismal Injury and Abnormalities,Reproductive System Disease,Respiratory Disease,Skeletal and Muscular Disorder…	Plasma Membrane	transmembrane receptor		Human,Mouse,Rat	Adipose,Bladder,Brain,Epidermis,Fibroblasts,Heart,Immune cells not otherwise specified,Lung,Monocytes not otherwise specified,Other Organ Systems,Ovary,Pancreas,Peripheral blood lymphocytes,Pituitary Gland,Placenta,Retina,Skeletal Muscle,Skin,Smooth Muscle,Smooth muscle cells not otherwise specified,Spleen,Uterus,786-0,A498,A549-ATCC,ACHN,BT-549,CAKI-1,CCRF-CEM,DU-145,EKVX,H460,HCT-116,HeLa,HL-60…
rno-miR-99b-5p	TargetScan Human	High (predicted)	BMPR2	bone morphogenetic protein receptor, type II (serine/threonine kinase)	Cancer,Cardiovascular Disease,Dermatological Diseases and Conditions,Developmental Disorder,Endocrine System Disorders,Gastrointestinal Disease,Hematological Disease,Hepatic System Disease,Hereditary Disorder,Inflammatory Response,Organismal Injury and Abnormalities,Reproductive System Disease,Respiratory Disease,Skeletal and Muscular Disorders,Tumor Morphology	Plasma Membrane	kinase	Adipogenesis pathway,BMP signaling pathway,Cardiomyocyte Differentiation via BMP Receptors,Epithelial Adherens Junction Signaling,Factors Promoting Cardiogenesis in Vertebrates,Human Embryonic Stem Cell Pluripotency,Molecular Mechanisms of Cancer,Mouse Embryonic Stem Cell Pluripotency,NF-κB Signaling,PPARα/RXRα Activation,PTEN Signaling,Role of NANOG in Mammalian Embryonic Stem Cell Pluripotency,…	Human,Mouse,Rat	Adipose,Adrenal Gland,Amygdala,BDCA-1+ dendritic cells,BDCA-3+ dendritic cells,Bladder,Brain,Brainstem,Caudate Nucleus,Central memory cytotoxic T cells,Cerebellum,Cerebral Cortex,Cerebral Ventricles,Choroid Plexus,Cornea,Cytotoxic T cells,Dorsal Root Ganglion,Effector memory cytotoxic T cells,Effector memory RA+ cytotoxic T cells,Effector T cells,Embryonic stem cells,Endothelial cells not otherwi…
rno-miR-99b-5p	TargetScan Human	High (predicted)	CAMTA1	calmodulin binding transcription activator 1	Cancer,Cardiovascular Disease,Developmental Disorder,Endocrine System Disorders,Gastrointestinal Disease,Hematological Disease,Hepatic System Disease,Hereditary Disorder,Immunological Disease,Metabolic Disease,Neurological Disease,Organismal Injury and Abnormalities	Other	other		Human,Mouse,Rat	Activated helper T cells,Adipose,Amygdala,B lymphocytes not otherwise specified,BDCA-1+ dendritic cells,BDCA-3+ dendritic cells,Central memory cytotoxic T cells,Central memory helper T cells,Cerebellum,Cerebral Cortex,Dorsal Root Ganglion,Effector memory cytotoxic T cells,Effector memory RA+ cytotoxic T cells,Epidermis,Heart,Hippocampus,Hypothalamus,Immature monocyte-derived dendritic cells,Kidne…
rno-miR-99b-5p	TargetScan Human	High (predicted)	CLDN11	claudin 11	Cancer,Endocrine System Disorders,Gastrointestinal Disease,Neurological Disease,Organismal Injury and Abnormalities,Psychological Disorders,Reproductive System Disease	Plasma Membrane	other	Agranulocyte Adhesion and Diapedesis,Granulocyte Adhesion and Diapedesis,Leukocyte Extravasation Signaling,Sertoli Cell-Sertoli Cell Junction Signaling,Tight Junction Signaling	Human,Mouse,Rat	Adipose,Amygdala,B lymphocytes not otherwise specified,Brain,Caudate Nucleus,Cerebellum,Cerebral Cortex,Cytotoxic T cells,Dorsal Root Ganglion,Effector T cells,Epidermis,Gray Matter,Heart,Hippocampus,Hypothalamus,Kidney,Large Intestine,Liver,Olfactory Bulb,Ovary,Pancreas,Pituitary Gland,Placenta,Prostate Gland,Retina,Sertoli cells,Skeletal Muscle,Small Intestine,Spleen,Striatum,Substantia Nigra,T…
rno-miR-99b-5p	TargetScan Human	Moderate (predicted)	CXCL16	chemokine (C-X-C motif) ligand 16	Cancer,Cardiovascular Disease,Connective Tissue Disorders,Endocrine System Disorders,Gastrointestinal Disease,Immunological Disease,Infectious Disease,Inflammatory Disease,Inflammatory Response,Metabolic Disease,Neurological Disease,Organismal Injury and Abnormalities,Psychological Disorders,Renal and Urological Disease,Reproductive System Disease,Skeletal and Muscular Disorders	Extracellular Space	cytokine	Agranulocyte Adhesion and Diapedesis,Granulocyte Adhesion and Diapedesis	Human,Mouse,Rat	Adipose,Amygdala,Astrocytes,B lymphocytes not otherwise specified,BDCA-1+ dendritic cells,BDCA-3+ dendritic cells,Bladder,Brain,Central memory cytotoxic T cells,Cytotoxic T cells,Dendritic cells not otherwise specified,Dorsal Root Ganglion,Effector memory cytotoxic T cells,Endothelial cells not otherwise specified,Epidermis,Epithelial cells not otherwise specified,Fibroblasts,Heart,HUVEC cells,Im…
rno-miR-99b-5p	TargetScan Human	High (predicted)	CYP26B1	cytochrome P450, family 26, subfamily B, polypeptide 1	Cancer,Cardiovascular Disease,Connective Tissue Disorders,Dental Disease,Developmental Disorder,Gastrointestinal Disease,Hereditary Disorder,Neurological Disease,Ophthalmic Disease,Psychological Disorders,Respiratory Disease,Skeletal and Muscular Disorders	Cytoplasm	enzyme		Human,Mouse,Rat	Adipose,Amygdala,Cerebellum,Cerebral Cortex,Cytotoxic T cells,Dorsal Root Ganglion,Effector T cells,Epidermis,Hippocampus,HUVEC cells,Hypothalamus,Kidney,Large Intestine,Liver,Other Cells,Other Organ Systems,Other Tissues and Primary Cells,Ovary,Pituitary Gland,Placenta,Retina,Sertoli cells,Skeletal Muscle,Smooth Muscle,Spleen,Substantia Nigra,T lymphocytes not otherwise specified,Testis,Thymus,V…
rno-miR-99b-5p	TargetScan Human	Moderate (predicted)	DFFB	DNA fragmentation factor, 40kDa, beta polypeptide (caspase-activated DNase)	Cancer,Developmental Disorder,Endocrine System Disorders,Gastrointestinal Disease,Hematological Disease,Immunological Disease	Nucleus	enzyme	Apoptosis Signaling,Cytotoxic T Lymphocyte-mediated Apoptosis of Target Cells,Death Receptor Signaling,Granzyme B Signaling,Induction of Apoptosis by HIV1,Tumoricidal Function of Hepatic Natural Killer Cells	Human,Mouse,Rat	Adipose,Amygdala,B lymphocytes not otherwise specified,Cerebellum,Cerebral Cortex,Cytotoxic T cells,Dorsal Root Ganglion,Effector T cells,Epidermis,Heart,Hippocampus,Hypothalamus,Immune cells not otherwise specified,Kidney,Large Intestine,Olfactory Bulb,Other Organ Systems,Ovary,Pancreas,Pituitary Gland,Placenta,Prostate Gland,Retina,Skeletal Muscle,Small Intestine,Spleen,Stomach,Substantia Nigra…
rno-miR-99b-5p	TargetScan Human	Moderate (predicted)	E2F2	E2F transcription factor 2	Cancer,Connective Tissue Disorders,Dermatological Diseases and Conditions,Developmental Disorder,Endocrine System Disorders,Gastrointestinal Disease,Hematological Disease,Hepatic System Disease,Hereditary Disorder,Immunological Disease,Infectious Disease,Inflammatory Disease,Inflammatory Response,Metabolic Disease,Organismal Injury and Abnormalities,Renal and Urological Disease,Reproductive Syste…	Nucleus	transcription regulator	Breast Cancer Regulation by Stathmin1,Cell Cycle Regulation by BTG Family Proteins,Cell Cycle: G1/S Checkpoint Regulation,Chronic Myeloid Leukemia Signaling,Cyclins and Cell Cycle Regulation,Estrogen-mediated S-phase Entry,Glioblastoma Multiforme Signaling,Glioma Signaling,Molecular Mechanisms of Cancer,Pancreatic Adenocarcinoma Signaling,Role of BRCA1 in DNA Damage Response,Role of CHK Proteins …	Human,Mouse,Rat	Activated helper T cells,Activated Vd2 Gamma-delta T cells,Adipose,B lymphocytes not otherwise specified,BDCA-1+ dendritic cells,Cytotoxic T cells,Dorsal Root Ganglion,Hematopoietic progenitor cells,Hypothalamus,Large Intestine,Lung,Lymph node,Lymphocytes not otherwise specified,Mammary Gland,Monocyte-derived macrophage,Natural T-regulatory cells,Neurons not otherwise specified,Other Tissues and …
rno-miR-99b-5p	miRecords	Experimentally Observed	FGF16	fibroblast growth factor 16	Cancer,Cardiovascular Disease,Developmental Disorder,Endocrine System Disorders,Hereditary Disorder,Organismal Injury and Abnormalities,Reproductive System Disease,Skeletal and Muscular Disorders	Extracellular Space	growth factor	Actin Cytoskeleton Signaling,Bladder Cancer Signaling,Clathrin-mediated Endocytosis Signaling,FGF Signaling,Regulation of the Epithelial-Mesenchymal Transition Pathway	Human,Mouse,Rat	Adipose,Amygdala,B lymphocytes not otherwise specified,Bladder,Brain,Cerebellum,Cytotoxic T cells,Dorsal Root Ganglion,Effector T cells,Epidermis,Heart,Hippocampus,Hypothalamus,Kidney,Large Intestine,Liver,Lung,Mammary Gland,Olfactory Bulb,Other Organ Systems,Ovary,Pancreas,Pituitary Gland,Placenta,Prostate Gland,Retina,Salivary Gland,Skeletal Muscle,Spleen,Testis,Thymus,Uterus
rno-miR-99b-5p	TargetScan Human	Moderate (predicted)	GDF11	growth differentiation factor 11	Cancer,Connective Tissue Disorders,Developmental Disorder,Endocrine System Disorders,Gastrointestinal Disease,Hepatic System Disease,Organismal Injury and Abnormalities,Skeletal and Muscular Disorders	Extracellular Space	growth factor		Human,Mouse,Rat	B lymphocytes not otherwise specified,Bladder,Cytotoxic T cells,Dorsal Root Ganglion,Effector T cells,Epidermis,Hippocampus,Large Intestine,Liver,Mammary Gland,Nervous System not otherwise specified,Pituitary Gland,Retina,Salivary Gland,Small Intestine,Testis,Thymus,ACHN,BT-549,CAKI-1,EKVX,H460,HCC-2998,IGROV1,KM-12,LOX IMVI,MALME-3M,NCI-ADR-RES,Other Cell Line,OVCAR-4,OVCAR-8,SF-295,SK-MEL-2,SNB…
rno-miR-99b-5p	TargetScan Human	Moderate (predicted)	GNS	glucosamine (N-acetyl)-6-sulfatase	Developmental Disorder,Hereditary Disorder,Metabolic Disease	Cytoplasm	enzyme		Human,Mouse,Rat	Activated CD56bright NK cells,Activated CD56dim NK cells,Activated helper T cells,Activated Vd1 Gamma-delta T cells,Activated Vd2 Gamma-delta T cells,Adipose,Amygdala,B lymphocytes not otherwise specified,BDCA-1+ dendritic cells,BDCA-3+ dendritic cells,Bladder,CD56dim NK cells,Central memory cytotoxic T cells,Central memory helper T cells,Cerebellum,Cerebral Cortex,Cytotoxic T cells,Dorsal Root G…
rno-miR-99b-5p	TargetScan Human	Moderate (predicted)	GPR56	G protein-coupled receptor 56	Cancer,Developmental Disorder,Hereditary Disorder,Neurological Disease,Organismal Injury and Abnormalities,Reproductive System Disease,Tumor Morphology	Plasma Membrane	G-protein coupled receptor		Human,Mouse,Rat	Activated Vd1 Gamma-delta T cells,Activated Vd2 Gamma-delta T cells,Adipose,Amygdala,B lymphocytes not otherwise specified,Bladder,Brain,CD56dim NK cells,Cerebellum,Cerebral Cortex,Cytotoxic T cells,Dorsal Root Ganglion,Effector memory cytotoxic T cells,Effector memory helper T cells,Effector memory RA+ cytotoxic T cells,Effector T cells,Epidermis,Heart,Hippocampus,Hypothalamus,Kidney,Large Intes…
rno-miR-99b-5p	TargetScan Human	Moderate (predicted)	HDAC3	histone deacetylase 3	Cancer,Cardiovascular Disease,Connective Tissue Disorders,Dermatological Diseases and Conditions,Developmental Disorder,Endocrine System Disorders,Gastrointestinal Disease,Hematological Disease,Hepatic System Disease,Immunological Disease,Infectious Disease,Inflammatory Disease,Inflammatory Response,Organismal Injury and Abnormalities,Reproductive System Disease,Respiratory Disease,Skeletal and M…	Nucleus	transcription regulator	Adipogenesis pathway,Calcium Signaling,Cell Cycle: G1/S Checkpoint Regulation,Chronic Myeloid Leukemia Signaling,Cyclins and Cell Cycle Regulation,Estrogen Receptor Signaling,Hereditary Breast Cancer Signaling,Huntington's Disease Signaling,Phospholipase C Signaling,Role of NFAT in Cardiac Hypertrophy,Telomerase Signaling,TR/RXR Activation	Human,Mouse,Rat	Adipocytes,Adipose,Amygdala,B lymphocytes not otherwise specified,Bladder,Bone marrow-derived macrophages,Brain,Brainstem,Cartilage Tissue,Cerebellum,Cerebral Cortex,Cerebral Ventricles,Chondrocytes,Choroid Plexus,Cytotoxic T cells,Dorsal Root Ganglion,Effector T cells,Epidermis,Granule cells,Gray Matter,Heart,Hippocampus,Hypothalamus,Kidney,Large Intestine,Liver,Lung,Macrophages not otherwise sp…
rno-miR-99b-5p	TargetScan Human	High (predicted)	HS3ST2	heparan sulfate (glucosamine) 3-O-sulfotransferase 2	Cancer,Endocrine System Disorders,Gastrointestinal Disease,Neurological Disease,Organismal Injury and Abnormalities,Renal and Urological Disease	Cytoplasm	enzyme	Chondroitin Sulfate Biosynthesis,Chondroitin Sulfate Biosynthesis (Late Stages),Dermatan Sulfate Biosynthesis,Dermatan Sulfate Biosynthesis (Late Stages),Heparan Sulfate Biosynthesis,Heparan Sulfate Biosynthesis (Late Stages),LPS/IL-1 Mediated Inhibition of RXR Function,Xenobiotic Metabolism Signaling	Human,Mouse,Rat	Adipose,Amygdala,B lymphocytes not otherwise specified,BDCA-3+ dendritic cells,Bladder,Brain,Central memory helper T cells,Cerebellum,Cerebral Cortex,Cytotoxic T cells,Dorsal Root Ganglion,Effector T cells,Epidermis,Heart,Hippocampus,Hypothalamus,Immature monocyte-derived dendritic cells,Kidney,Large Intestine,Liver,Lung,Mammary Gland,Mature monocyte-derived dendritic cells,Monocyte-derived macro…
rno-miR-99b-5p	Ingenuity Expert Findings,TargetScan Human,miRecords	Experimentally Observed,High (predicted)	IGF1R	insulin-like growth factor 1 receptor	Cancer,Cardiovascular Disease,Connective Tissue Disorders,Dermatological Diseases and Conditions,Developmental Disorder,Endocrine System Disorders,Gastrointestinal Disease,Hematological Disease,Hepatic System Disease,Hereditary Disorder,Immunological Disease,Infectious Disease,Inflammatory Disease,Inflammatory Response,Metabolic Disease,Neurological Disease,Nutritional Disease,Organismal Injury a…	Plasma Membrane	transmembrane receptor	Cardiac Hypertrophy Signaling,Estrogen-Dependent Breast Cancer Signaling,Glioblastoma Multiforme Signaling,Glioma Signaling,Growth Hormone Signaling,Hepatic Fibrosis / Hepatic Stellate Cell Activation,Huntington's Disease Signaling,IGF-1 Signaling,Myc Mediated Apoptosis Signaling,NF-κB Signaling,PTEN Signaling,RhoA Signaling,Role of NFAT in Cardiac Hypertrophy,STAT3 Pathway,Synaptic Long Term Dep…	Human,Mouse,Rat	Activated CD56bright NK cells,Activated helper T cells,Activated Vd1 Gamma-delta T cells,Activated Vd2 Gamma-delta T cells,Adipocytes,Adipose,Adrenal Gland,Amygdala,Astrocytes,B lymphocytes not otherwise specified,BDCA-1+ dendritic cells,BDCA-3+ dendritic cells,Beta islet cells,Bladder,Bone marrow cells not otherwise specified,Brain,Cartilage Tissue,Caudate Nucleus,CD34+ cells,CD56bright NK cells…
rno-miR-99b-5p	TargetScan Human	Moderate (predicted)	IREB2	iron-responsive element binding protein 2	Cancer,Connective Tissue Disorders,Developmental Disorder,Endocrine System Disorders,Gastrointestinal Disease,Hematological Disease,Hepatic System Disease,Metabolic Disease,Neurological Disease,Organismal Injury and Abnormalities,Psychological Disorders,Reproductive System Disease,Skeletal and Muscular Disorders	Cytoplasm	translation regulator		Human,Mouse,Rat	Activated helper T cells,Adipose,Amygdala,B lymphocytes not otherwise specified,BDCA-1+ dendritic cells,BDCA-3+ dendritic cells,Bladder,Brain,Central memory cytotoxic T cells,Cerebellum,Cerebral Cortex,Cytotoxic T cells,Dorsal Root Ganglion,Effector memory cytotoxic T cells,Effector memory RA+ cytotoxic T cells,Effector T cells,Epidermis,Granule Cell Layer,Heart,Hippocampus,Hypothalamus,Immature …
rno-miR-99b-5p	TargetScan Human	High (predicted)	MBNL1	muscleblind-like splicing regulator 1	Cancer,Developmental Disorder,Hereditary Disorder,Ophthalmic Disease,Organismal Injury and Abnormalities,Reproductive System Disease,Skeletal and Muscular Disorders	Nucleus	other		Human,Mouse,Rat	Activated helper T cells,Activated Vd1 Gamma-delta T cells,Activated Vd2 Gamma-delta T cells,Adipose,Amygdala,B lymphocytes not otherwise specified,BDCA-1+ dendritic cells,BDCA-3+ dendritic cells,Bladder,Brain,Central memory cytotoxic T cells,Cerebellum,Cerebral Cortex,Cytotoxic T cells,Dorsal Root Ganglion,Effector memory cytotoxic T cells,Effector memory RA+ cytotoxic T cells,Effector T cells,E…
rno-miR-99b-5p	Ingenuity Expert Findings,TargetScan Human,miRecords	Experimentally Observed,High (predicted)	MTOR	mechanistic target of rapamycin (serine/threonine kinase)	Cancer,Cardiovascular Disease,Connective Tissue Disorders,Dermatological Diseases and Conditions,Developmental Disorder,Endocrine System Disorders,Gastrointestinal Disease,Hematological Disease,Hepatic System Disease,Hereditary Disorder,Immunological Disease,Infectious Disease,Inflammatory Disease,Inflammatory Response,Metabolic Disease,Neurological Disease,Ophthalmic Disease,Organismal Injury an…	Nucleus	kinase	Acute Myeloid Leukemia Signaling,Acute Phase Response Signaling,AMPK Signaling,B Cell Receptor Signaling,Cardiac Hypertrophy Signaling,CNTF Signaling,EGF Signaling,ErbB Signaling,FLT3 Signaling in Hematopoietic Progenitor Cells,Glioblastoma Multiforme Signaling,Glioma Signaling,Huntington's Disease Signaling,IL-4 Signaling,IL-8 Signaling,ILK Signaling,Insulin Receptor Signaling,JAK/Stat Signaling…	Human,Mouse,Rat	Activated Vd1 Gamma-delta T cells,Activated Vd2 Gamma-delta T cells,Adipose,Amygdala,B lymphocytes not otherwise specified,BDCA-1+ dendritic cells,BDCA-3+ dendritic cells,Bladder,Brain,Central memory cytotoxic T cells,Cerebellum,Cerebral Cortex,Cytotoxic T cells,Dorsal Root Ganglion,Effector memory cytotoxic T cells,Effector memory RA+ cytotoxic T cells,Effector T cells,Epidermis,Fibroblasts,Hear…
rno-miR-99b-5p	TargetScan Human	High (predicted)	NIPBL	Nipped-B homolog (Drosophila)	Cancer,Developmental Disorder,Endocrine System Disorders,Gastrointestinal Disease,Hematological Disease,Hepatic System Disease,Hereditary Disorder,Immunological Disease,Organismal Injury and Abnormalities,Renal and Urological Disease,Reproductive System Disease	Nucleus	transcription regulator		Human,Mouse,Rat	Activated CD56bright NK cells,Activated CD56dim NK cells,Activated helper T cells,Activated Vd1 Gamma-delta T cells,Activated Vd2 Gamma-delta T cells,Adipose,Amygdala,B lymphocytes not otherwise specified,BDCA-1+ dendritic cells,BDCA-3+ dendritic cells,Bladder,CD56dim NK cells,Central memory cytotoxic T cells,Central memory helper T cells,Cerebellum,Cerebral Cortex,Cytotoxic T cells,Dorsal Root G…
rno-miR-99b-5p	TargetScan Human	High (predicted)	PPP3CA	protein phosphatase 3, catalytic subunit, alpha isozyme	Cancer,Cardiovascular Disease,Connective Tissue Disorders,Dermatological Diseases and Conditions,Developmental Disorder,Endocrine System Disorders,Gastrointestinal Disease,Hematological Disease,Hepatic System Disease,Hereditary Disorder,Immunological Disease,Infectious Disease,Inflammatory Disease,Inflammatory Response,Metabolic Disease,Neurological Disease,Ophthalmic Disease,Organismal Injury an…	Cytoplasm	phosphatase	3-phosphoinositide Biosynthesis,3-phosphoinositide Degradation,Amyotrophic Lateral Sclerosis Signaling,Axonal Guidance Signaling,B Cell Receptor Signaling,Calcium Signaling,Calcium-induced T Lymphocyte Apoptosis,cAMP-mediated signaling,Cardiac Hypertrophy Signaling,CD28 Signaling in T Helper Cells,Clathrin-mediated Endocytosis Signaling,D-myo-inositol (1,4,5,6)-Tetrakisphosphate Biosynthesis,D-my…	Human,Mouse,Rat	Adipose,Amygdala,B lymphocytes not otherwise specified,Bladder,Bone marrow cells not otherwise specified,Brain,Cerebellum,Cerebral Cortex,Cytotoxic T cells,Dorsal Root Ganglion,Effector T cells,Epidermis,Granule cells,Heart,Hippocampus,Hypothalamus,Kidney,Large Intestine,Liver,Lung,Mammary Gland,Murine NKT cells,Olfactory Bulb,Oocytes,Osteoblasts,Other Tissues and Primary Cells,Ovary,Pancreas,Pit…
rno-miR-99b-5p	TargetScan Human	Moderate (predicted)	PRDM1	PR domain containing 1, with ZNF domain	Cancer,Connective Tissue Disorders,Dermatological Diseases and Conditions,Developmental Disorder,Gastrointestinal Disease,Hematological Disease,Hepatic System Disease,Hereditary Disorder,Immunological Disease,Inflammatory Disease,Inflammatory Response,Neurological Disease,Organismal Injury and Abnormalities,Reproductive System Disease,Skeletal and Muscular Disorders	Nucleus	transcription regulator		Human,Mouse,Rat	Activated helper T cells,Adipose,Amygdala,B lymphocytes not otherwise specified,BDCA-1+ dendritic cells,Bladder,Central memory cytotoxic T cells,Cerebellum,Cerebral Cortex,Cytotoxic T cells,Dorsal Root Ganglion,Effector memory cytotoxic T cells,Effector memory RA+ cytotoxic T cells,Effector T cells,Epidermis,Granulocytes not otherwise specified,Heart,Hematopoietic progenitor cells,Hippocampus,Hyp…
rno-miR-99b-5p	TargetScan Human	Moderate (predicted)	RAC1	ras-related C3 botulinum toxin substrate 1 (rho family, small GTP binding protein Rac1)	Cancer,Cardiovascular Disease,Connective Tissue Disorders,Dermatological Diseases and Conditions,Developmental Disorder,Endocrine System Disorders,Gastrointestinal Disease,Hematological Disease,Hereditary Disorder,Immunological Disease,Infectious Disease,Inflammatory Disease,Inflammatory Response,Metabolic Disease,Neurological Disease,Organismal Injury and Abnormalities,Renal and Urological Disea…	Plasma Membrane	enzyme	Actin Cytoskeleton Signaling,Actin Nucleation by ARP-WASP Complex,Agrin Interactions at Neuromuscular Junction,Amyotrophic Lateral Sclerosis Signaling,Axonal Guidance Signaling,B Cell Receptor Signaling,Breast Cancer Regulation by Stathmin1,CCR3 Signaling in Eosinophils,CD28 Signaling in T Helper Cells,Clathrin-mediated Endocytosis Signaling,Colorectal Cancer Metastasis Signaling,CXCR4 Signaling,…	Human,Mouse,Rat	Activated CD56bright NK cells,Activated CD56dim NK cells,Activated helper T cells,Activated Vd1 Gamma-delta T cells,Activated Vd2 Gamma-delta T cells,Adipose,Amygdala,B lymphocytes not otherwise specified,BDCA-1+ dendritic cells,BDCA-3+ dendritic cells,Bladder,Bone marrow cells not otherwise specified,Brain,CD56bright NK cells,CD56dim NK cells,Central memory cytotoxic T cells,Central memory helpe…
rno-miR-99b-5p	TargetScan Human	Moderate (predicted)	RCBTB1	regulator of chromosome condensation (RCC1) and BTB (POZ) domain containing protein 1	Cancer,Developmental Disorder,Gastrointestinal Disease,Hepatic System Disease,Organismal Injury and Abnormalities,Psychological Disorders,Renal and Urological Disease,Reproductive System Disease,Skeletal and Muscular Disorders	Nucleus	other		Human,Mouse,Rat	Activated CD56bright NK cells,Activated CD56dim NK cells,Activated helper T cells,Activated Vd1 Gamma-delta T cells,Activated Vd2 Gamma-delta T cells,Adipose,Amygdala,B lymphocytes not otherwise specified,BDCA-1+ dendritic cells,BDCA-3+ dendritic cells,Bladder,Brain,CD56dim NK cells,Central memory cytotoxic T cells,Central memory helper T cells,Cerebellum,Cytotoxic T cells,Dorsal Root Ganglion,Ef…
rno-miR-99b-5p	miRecords	Experimentally Observed	RPTOR	regulatory associated protein of MTOR, complex 1	Cancer,Cardiovascular Disease,Connective Tissue Disorders,Developmental Disorder,Endocrine System Disorders,Gastrointestinal Disease,Hematological Disease,Hepatic System Disease,Immunological Disease,Inflammatory Disease,Inflammatory Response,Metabolic Disease,Neurological Disease,Organismal Injury and Abnormalities,Skeletal and Muscular Disorders	Cytoplasm	other	AMPK Signaling,Insulin Receptor Signaling,mTOR Signaling	Human,Mouse,Rat	Adipose,Amygdala,B lymphocytes not otherwise specified,Bladder,Brain,Cerebellum,Cerebral Cortex,Cytotoxic T cells,Dorsal Root Ganglion,Effector T cells,Epidermis,Heart,Hippocampus,Hypothalamus,Kidney,Large Intestine,Liver,Lung,Monocyte-derived macrophage,Olfactory Bulb,Ovary,Peripheral blood leukocytes not otherwise specified,Pituitary Gland,Placenta,Prostate Gland,Retina,Skeletal Muscle,Small In…
rno-miR-99b-5p	TargetScan Human	Moderate (predicted)	RRN3	RRN3 RNA polymerase I transcription factor homolog (S. cerevisiae)	Cancer,Dermatological Diseases and Conditions,Developmental Disorder,Gastrointestinal Disease,Hepatic System Disease,Immunological Disease,Inflammatory Disease,Inflammatory Response	Nucleus	transcription regulator		Human,Mouse,Rat	Adipose,Amygdala,B lymphocytes not otherwise specified,BDCA-1+ dendritic cells,BDCA-3+ dendritic cells,Bladder,Central memory cytotoxic T cells,Cerebellum,Cerebral Cortex,Cytotoxic T cells,Dorsal Root Ganglion,Effector memory cytotoxic T cells,Effector memory RA+ cytotoxic T cells,Effector T cells,Epidermis,Heart,Hippocampus,Hypothalamus,Large Intestine,Liver,Lung,Mature monocyte-derived dendriti…
rno-miR-99b-5p	TargetScan Human	High (predicted)	SMARCA4	SWI/SNF related, matrix associated, actin dependent regulator of chromatin, subfamily a, member 4	Cancer,Connective Tissue Disorders,Dermatological Diseases and Conditions,Developmental Disorder,Endocrine System Disorders,Gastrointestinal Disease,Hematological Disease,Hepatic System Disease,Hereditary Disorder,Immunological Disease,Inflammatory Response,Neurological Disease,Organismal Injury and Abnormalities,Renal and Urological Disease,Skeletal and Muscular Disorders,Tumor Morphology	Nucleus	transcription regulator	AMPK Signaling,Aryl Hydrocarbon Receptor Signaling,Estrogen Receptor Signaling,Glucocorticoid Receptor Signaling,Hereditary Breast Cancer Signaling,RAR Activation,Role of BRCA1 in DNA Damage Response	Human,Mouse,Rat	Adipose,Amygdala,B lymphocytes not otherwise specified,Bladder,Brain,Cerebellum,Cerebral Cortex,Cytotoxic T cells,Dorsal Root Ganglion,Effector T cells,Embryonic stem cells,Epidermis,Heart,Hematopoietic progenitor cells,Hippocampus,Hypothalamus,Kidney,Large Intestine,Liver,Lung,Mammary Gland,Memory B cells,Murine NKT cells,Naive B cells,Olfactory Bulb,Other Cells,Other Epithelial cells,Other Orga…
rno-miR-99b-5p	TargetScan Human	Moderate (predicted)	SORL1	sortilin-related receptor, L(DLR class) A repeats containing	Cancer,Connective Tissue Disorders,Dermatological Diseases and Conditions,Developmental Disorder,Gastrointestinal Disease,Hepatic System Disease,Hereditary Disorder,Immunological Disease,Inflammatory Disease,Metabolic Disease,Neurological Disease,Organismal Injury and Abnormalities,Psychological Disorders,Reproductive System Disease,Skeletal and Muscular Disorders	Cytoplasm	transporter		Human,Mouse,Rat	Activated CD56bright NK cells,Activated CD56dim NK cells,Activated helper T cells,Activated Vd1 Gamma-delta T cells,Activated Vd2 Gamma-delta T cells,Adipose,Amygdala,B lymphocytes not otherwise specified,BDCA-1+ dendritic cells,BDCA-3+ dendritic cells,Bladder,CD56bright NK cells,CD56dim NK cells,Central memory cytotoxic T cells,Central memory helper T cells,Cerebellum,Cerebral Cortex,Cytotoxic T…
rno-miR-99b-5p	TargetScan Human	Moderate (predicted)	STAT5B	signal transducer and activator of transcription 5B	Cancer,Connective Tissue Disorders,Dermatological Diseases and Conditions,Developmental Disorder,Endocrine System Disorders,Gastrointestinal Disease,Hematological Disease,Hepatic System Disease,Hereditary Disorder,Hypersensitivity Response,Immunological Disease,Infectious Disease,Inflammatory Disease,Inflammatory Response,Metabolic Disease,Nutritional Disease,Organismal Injury and Abnormalities,R…	Nucleus	transcription regulator	Acute Myeloid Leukemia Signaling,Adipogenesis pathway,Angiopoietin Signaling,Antioxidant Action of Vitamin C,Chronic Myeloid Leukemia Signaling,ErbB2-ErbB3 Signaling,Erythropoietin Signaling,Estrogen-Dependent Breast Cancer Signaling,FLT3 Signaling in Hematopoietic Progenitor Cells,Glucocorticoid Receptor Signaling,GM-CSF Signaling,Growth Hormone Signaling,IL-15 Signaling,IL-2 Signaling,IL-22 Sig…	Human,Mouse,Rat	Activated CD56bright NK cells,Activated CD56dim NK cells,Activated helper T cells,Activated Vd1 Gamma-delta T cells,Activated Vd2 Gamma-delta T cells,Adipose,B lymphocytes not otherwise specified,BDCA-1+ dendritic cells,BDCA-3+ dendritic cells,Bladder,CD56bright NK cells,CD56dim NK cells,Central memory cytotoxic T cells,Central memory helper T cells,Cerebellum,Cytotoxic T cells,Dendritic cells no…
rno-miR-99b-5p	TargetScan Human	High (predicted)	SUDS3	suppressor of defective silencing 3 homolog (S. cerevisiae)	Cancer,Endocrine System Disorders,Gastrointestinal Disease	Nucleus	other	DNA Methylation and Transcriptional Repression Signaling	Human,Mouse,Rat	Activated helper T cells,Adipose,Amygdala,B lymphocytes not otherwise specified,BDCA-1+ dendritic cells,BDCA-3+ dendritic cells,Bladder,Central memory cytotoxic T cells,Cerebellum,Cerebral Cortex,Cytotoxic T cells,Dorsal Root Ganglion,Effector memory cytotoxic T cells,Effector memory RA+ cytotoxic T cells,Effector T cells,Epidermis,Heart,Hippocampus,Hypothalamus,Immature monocyte-derived dendriti…
rno-miR-99b-5p	TargetScan Human	Moderate (predicted)	TBKBP1	TBK1 binding protein 1	Cancer,Endocrine System Disorders,Gastrointestinal Disease,Hepatic System Disease	Other	other		Human,Mouse,Rat	Adipose,Amygdala,B lymphocytes not otherwise specified,Bladder,Cerebellum,Cerebral Cortex,Cytotoxic T cells,Dorsal Root Ganglion,Effector T cells,Epidermis,Heart,Hippocampus,Hypothalamus,Kidney,Large Intestine,Liver,Lung,Mammary Gland,Olfactory Bulb,Ovary,Pancreas,Pituitary Gland,Placenta,Prostate Gland,Retina,Salivary Gland,Skeletal Muscle,Small Intestine,Spleen,Stomach,Substantia Nigra,Testis,T…
rno-miR-99b-5p	TargetScan Human	High (predicted)	TMPRSS13	transmembrane protease, serine 13	Cancer,Endocrine System Disorders,Gastrointestinal Disease,Hepatic System Disease,Organismal Injury and Abnormalities,Renal and Urological Disease	Other	peptidase		Human,Mouse,Rat	Adipose,Amygdala,B lymphocytes not otherwise specified,Bladder,Brain,Cerebellum,Cerebral Cortex,Cytotoxic T cells,Dorsal Root Ganglion,Effector T cells,Epidermis,Heart,Hippocampus,HUVEC cells,Hypothalamus,Kidney,Large Intestine,Liver,Lung,Mammary Gland,Olfactory Bulb,Ovary,Pancreas,Peripheral blood leukocytes not otherwise specified,Pituitary Gland,Placenta,Prostate Gland,Retina,Salivary Gland,Sk…
rno-miR-99b-5p	TargetScan Human	High (predicted)	TRIB1	tribbles pseudokinase 1	Cancer,Cardiovascular Disease,Connective Tissue Disorders,Developmental Disorder,Endocrine System Disorders,Gastrointestinal Disease,Hematological Disease,Hepatic System Disease,Hypersensitivity Response,Immunological Disease,Inflammatory Response,Metabolic Disease,Neurological Disease,Organismal Injury and Abnormalities,Renal and Urological Disease,Reproductive System Disease,Tumor Morphology	Cytoplasm	kinase		Human,Mouse,Rat	Activated CD56bright NK cells,Activated CD56dim NK cells,Activated Vd1 Gamma-delta T cells,Activated Vd2 Gamma-delta T cells,Adipose,Amygdala,B lymphocytes not otherwise specified,BDCA-1+ dendritic cells,BDCA-3+ dendritic cells,Bladder,Central memory helper T cells,Cerebellum,Cerebral Cortex,Cytotoxic T cells,Dorsal Root Ganglion,Effector T cells,Epidermis,Heart,Hippocampus,Immature monocyte-deri…
rno-miR-99b-5p	TargetScan Human	Moderate (predicted)	XXYLT1	xyloside xylosyltransferase 1	Cancer,Endocrine System Disorders,Gastrointestinal Disease,Organismal Injury and Abnormalities,Reproductive System Disease	Other	other		Human,Mouse,Rat	Adipose,Amygdala,B lymphocytes not otherwise specified,BDCA-1+ dendritic cells,Bladder,Cerebellum,Cerebral Cortex,Cytotoxic T cells,Dorsal Root Ganglion,Effector T cells,Epidermis,Heart,Hippocampus,Hypothalamus,Kidney,Large Intestine,Liver,Lung,Mammary Gland,Mature monocyte-derived dendritic cells,Olfactory Bulb,Ovary,Pituitary Gland,Placenta,Plasmacytoid dendritic cells,Prostate Gland,Retina,Sal…
rno-miR-99b-5p	TargetScan Human	High (predicted)	ZADH2	zinc binding alcohol dehydrogenase domain containing 2	Cancer,Endocrine System Disorders,Gastrointestinal Disease,Hepatic System Disease	Cytoplasm	enzyme		Human,Mouse,Rat	Activated helper T cells,Adipose,Amygdala,B lymphocytes not otherwise specified,BDCA-1+ dendritic cells,BDCA-3+ dendritic cells,Bladder,Central memory cytotoxic T cells,Cerebellum,Cerebral Cortex,Cytotoxic T cells,Dorsal Root Ganglion,Effector memory cytotoxic T cells,Effector memory RA+ cytotoxic T cells,Effector T cells,Epidermis,Heart,Hippocampus,Hypothalamus,Immature monocyte-derived dendriti…
rno-miR-99b-5p	TargetScan Human	High (predicted)	ZBTB7A	zinc finger and BTB domain containing 7A	Cancer,Connective Tissue Disorders,Endocrine System Disorders,Gastrointestinal Disease,Hematological Disease,Hepatic System Disease,Immunological Disease,Metabolic Disease,Organismal Injury and Abnormalities,Reproductive System Disease,Tumor Morphology	Nucleus	transcription regulator		Human,Mouse,Rat	Activated CD56bright NK cells,Activated Vd1 Gamma-delta T cells,Activated Vd2 Gamma-delta T cells,Adipocytes,Adipose,Amygdala,B lymphocytes not otherwise specified,BDCA-1+ dendritic cells,BDCA-3+ dendritic cells,Bladder,Brain,CD56bright NK cells,CD56dim NK cells,Central memory cytotoxic T cells,Central memory helper T cells,Cerebellum,Cerebral Cortex,Cytotoxic T cells,Dorsal Root Ganglion,Effecto…
rno-miR-99b-5p	TargetScan Human	High (predicted)	ZNRF2	zinc and ring finger 2	Cancer,Endocrine System Disorders,Gastrointestinal Disease	Other	enzyme		Human,Mouse,Rat	Adipose,B lymphocytes not otherwise specified,BDCA-1+ dendritic cells,BDCA-3+ dendritic cells,Bladder,Brain,Cerebral Cortex,Cytotoxic T cells,Dorsal Root Ganglion,Effector memory cytotoxic T cells,Effector memory RA+ cytotoxic T cells,Effector T cells,Epidermis,Immature monocyte-derived dendritic cells,Kidney,Large Intestine,Liver,Lung,Mammary Gland,Mature monocyte-derived dendritic cells,Monocyt…
rno-miR-99b-5p	TargetScan Human	High (predicted)	ZZEF1	zinc finger, ZZ-type with EF-hand domain 1	Cancer,Dermatological Diseases and Conditions,Endocrine System Disorders,Gastrointestinal Disease,Organismal Injury and Abnormalities,Reproductive System Disease	Other	other		Human,Mouse,Rat	Activated CD56bright NK cells,Activated CD56dim NK cells,Activated Vd1 Gamma-delta T cells,Activated Vd2 Gamma-delta T cells,Adipose,Amygdala,B lymphocytes not otherwise specified,BDCA-1+ dendritic cells,BDCA-3+ dendritic cells,Bladder,Central memory cytotoxic T cells,Central memory helper T cells,Cerebellum,Cerebral Cortex,Cytotoxic T cells,Dorsal Root Ganglion,Effector memory cytotoxic T cells,…
rno-miR-132-3p	TargetScan Human	Moderate (predicted)	ABCA12	ATP-binding cassette, sub-family A (ABC1), member 12	Cancer,Cardiovascular Disease,Dermatological Diseases and Conditions,Developmental Disorder,Endocrine System Disorders,Gastrointestinal Disease,Hepatic System Disease,Hereditary Disorder,Organismal Injury and Abnormalities,Reproductive System Disease,Respiratory Disease	Plasma Membrane	transporter		Human,Mouse,Rat	Activated CD56bright NK cells,Activated Vd2 Gamma-delta T cells,Adipose,Amygdala,B lymphocytes not otherwise specified,Bladder,CD56bright NK cells,Cerebellum,Cerebral Cortex,Cytotoxic T cells,Dorsal Root Ganglion,Effector T cells,Epidermis,Heart,Hippocampus,Hypothalamus,Kidney,Large Intestine,Liver,Lung,Mammary Gland,Olfactory Bulb,Ovary,Pancreas,Pituitary Gland,Placenta,Prostate Gland,Retina,Sal…
rno-miR-132-3p	TargetScan Human	High (predicted)	ABHD5	abhydrolase domain containing 5	Cancer,Dermatological Diseases and Conditions,Developmental Disorder,Endocrine System Disorders,Gastrointestinal Disease,Hepatic System Disease,Hereditary Disorder,Metabolic Disease,Organismal Injury and Abnormalities,Skeletal and Muscular Disorders	Cytoplasm	enzyme	CDP-diacylglycerol Biosynthesis I,Phosphatidylglycerol Biosynthesis II (Non-plastidic),Triacylglycerol Biosynthesis	Human,Mouse,Rat	Activated CD56bright NK cells,Activated CD56dim NK cells,Activated Vd1 Gamma-delta T cells,Activated Vd2 Gamma-delta T cells,Adipose,Adrenal Gland,BDCA-1+ dendritic cells,BDCA-3+ dendritic cells,Bladder,CD56bright NK cells,CD56dim NK cells,Central memory cytotoxic T cells,Cerebellum,Cytotoxic T cells,Dorsal Root Ganglion,Effector memory cytotoxic T cells,Effector memory RA+ cytotoxic T cells,Epid…
rno-miR-132-3p	TargetScan Human	Moderate (predicted)	ACP1	acid phosphatase 1, soluble	Cancer,Connective Tissue Disorders,Endocrine System Disorders,Gastrointestinal Disease,Hepatic System Disease,Hereditary Disorder,Neurological Disease,Nutritional Disease,Psychological Disorders,Skeletal and Muscular Disorders	Cytoplasm	phosphatase	3-phosphoinositide Biosynthesis,3-phosphoinositide Degradation,D-myo-inositol (1,4,5,6)-Tetrakisphosphate Biosynthesis,D-myo-inositol (3,4,5,6)-tetrakisphosphate Biosynthesis,D-myo-inositol-5-phosphate Metabolism,Ephrin B Signaling,Ephrin Receptor Signaling,NAD Phosphorylation and Dephosphorylation,NAD Salvage Pathway II,PDGF Signaling,Protein Kinase A Signaling,Superpathway of Inositol Phosphate…	Human,Mouse,Rat	Adipose,Amygdala,B lymphocytes not otherwise specified,Bladder,Central memory cytotoxic T cells,Cerebellum,Cerebral Cortex,Cytotoxic T cells,Dorsal Root Ganglion,Effector memory cytotoxic T cells,Effector memory RA+ cytotoxic T cells,Effector T cells,Epidermis,Heart,Hepatocytes,Hippocampus,Hypothalamus,Kidney,Large Intestine,Liver,Lung,Mammary Gland,Memory B cells,Murine NKT cells,Naive B cells,O…
rno-miR-132-3p	TargetScan Human	High (predicted)	ACVR2B	activin A receptor, type IIB	Cancer,Cardiovascular Disease,Connective Tissue Disorders,Dermatological Diseases and Conditions,Developmental Disorder,Gastrointestinal Disease,Hematological Disease,Hepatic System Disease,Hereditary Disorder,Metabolic Disease,Organismal Injury and Abnormalities,Renal and Urological Disease,Respiratory Disease,Skeletal and Muscular Disorders	Plasma Membrane	kinase	Epithelial Adherens Junction Signaling,Factors Promoting Cardiogenesis in Vertebrates,PPARα/RXRα Activation,TGF-β Signaling,Wnt/β-catenin Signaling	Human,Mouse,Rat	Activated CD56bright NK cells,Activated Vd1 Gamma-delta T cells,Activated Vd2 Gamma-delta T cells,Adrenal Gland,Amygdala,BDCA-3+ dendritic cells,Bladder,Brain,Central memory cytotoxic T cells,Cerebellum,Cytotoxic T cells,Effector memory cytotoxic T cells,Endothelial cells not otherwise specified,Epidermis,Epithelial cells not otherwise specified,Hippocampus,Hypothalamus,Kidney,Liver,Lung,Mammary …
rno-miR-132-3p	TargetScan Human	High (predicted)	AFF4	AF4/FMR2 family, member 4	Cancer,Developmental Disorder,Gastrointestinal Disease,Hepatic System Disease,Nutritional Disease,Organismal Injury and Abnormalities,Reproductive System Disease,Respiratory Disease	Nucleus	transcription regulator		Human,Mouse,Rat	Activated Vd1 Gamma-delta T cells,Activated Vd2 Gamma-delta T cells,Adipose,Amygdala,B lymphocytes not otherwise specified,BDCA-1+ dendritic cells,BDCA-3+ dendritic cells,Bladder,Brain,Central memory cytotoxic T cells,Cerebellum,Cytotoxic T cells,Dorsal Root Ganglion,Effector memory cytotoxic T cells,Effector memory RA+ cytotoxic T cells,Effector T cells,Epidermis,Heart,Hepatocytes,Hippocampus,Hy…
rno-miR-132-3p	TargetScan Human	Moderate (predicted)	AHCY	adenosylhomocysteinase	Antimicrobial Response,Cancer,Dermatological Diseases and Conditions,Developmental Disorder,Gastrointestinal Disease,Hematological Disease,Hereditary Disorder,Immunological Disease,Inflammatory Disease,Inflammatory Response,Metabolic Disease,Neurological Disease,Psychological Disorders,Skeletal and Muscular Disorders,Tumor Morphology	Cytoplasm	enzyme	Aldosterone Signaling in Epithelial Cells,Cysteine Biosynthesis III (mammalia),Methionine Degradation I (to Homocysteine),Superpathway of Methionine Degradation	Human,Mouse,Rat	B lymphocytes not otherwise specified,Cytotoxic T cells,Dorsal Root Ganglion,Effector T cells,Hippocampus,Hypothalamus,Kidney,Large Intestine,Liver,Memory B cells,Murine NKT cells,Naive B cells,Olfactory Bulb,Ovary,Pancreas,Pituitary Gland,Retina,Small Intestine,Spleen,Substantia Nigra,Testis,Thymus,Uterus,786-0,A498,A549-ATCC,ACHN,BT-549,CAKI-1,CCRF-CEM,COLO205,DU-145,EKVX,H460,HCC-2998,HCT-116,…
rno-miR-132-3p	TargetScan Human	High (predicted)	AMOT	angiomotin	Cancer,Developmental Disorder,Endocrine System Disorders,Gastrointestinal Disease,Hematological Disease,Hepatic System Disease,Immunological Disease,Nutritional Disease,Organismal Injury and Abnormalities,Reproductive System Disease	Plasma Membrane	other	HIPPO signaling	Human,Mouse,Rat	Adipose,Amygdala,B lymphocytes not otherwise specified,Bladder,Brain,Cerebellum,Cerebral Cortex,Cytotoxic T cells,Dermis,Dorsal Root Ganglion,Effector T cells,Epidermis,Fibroblasts,Heart,Hippocampus,HUVEC cells,Hypothalamus,Kidney,Large Intestine,Liver,Lung,Mammary Gland,Memory B cells,Naive B cells,Olfactory Bulb,Ovary,Pancreas,Pituitary Gland,Placenta,Prostate Gland,Retina,Salivary Gland,Skelet…
rno-miR-132-3p	TargetScan Human	Moderate (predicted)	ANXA4	annexin A4	Cancer,Endocrine System Disorders,Gastrointestinal Disease,Hematological Disease,Immunological Disease,Inflammatory Disease	Plasma Membrane	other		Human,Mouse,Rat	Activated CD56bright NK cells,Activated CD56dim NK cells,Activated Vd1 Gamma-delta T cells,Activated Vd2 Gamma-delta T cells,Adipose,BDCA-1+ dendritic cells,BDCA-3+ dendritic cells,Bladder,Central memory helper T cells,Cytotoxic T cells,Effector memory helper T cells,Epidermis,Heart,Immature monocyte-derived dendritic cells,Kidney,Large Intestine,Liver,Lung,Mammary Gland,Mature monocyte-derived d…
rno-miR-132-3p	TargetScan Human	High (predicted)	APAF1	apoptotic peptidase activating factor 1	Cancer,Connective Tissue Disorders,Dermatological Diseases and Conditions,Developmental Disorder,Endocrine System Disorders,Gastrointestinal Disease,Inflammatory Disease,Inflammatory Response,Neurological Disease,Organismal Injury and Abnormalities,Psychological Disorders,Renal and Urological Disease,Reproductive System Disease,Skeletal and Muscular Disorders,Tumor Morphology	Cytoplasm	other	Amyotrophic Lateral Sclerosis Signaling,Apoptosis Signaling,Aryl Hydrocarbon Receptor Signaling,CD27 Signaling in Lymphocytes,Cytotoxic T Lymphocyte-mediated Apoptosis of Target Cells,Death Receptor Signaling,Docosahexaenoic Acid (DHA) Signaling,Granzyme B Signaling,Huntington's Disease Signaling,Induction of Apoptosis by HIV1,Lymphotoxin β Receptor Signaling,Molecular Mechanisms of Cancer,Myc Me…	Human,Mouse,Rat	Adipose,Amygdala,B lymphocytes not otherwise specified,Bladder,Blood platelets,Brain,Cerebellum,Cerebral Cortex,Cytotoxic T cells,Dorsal Root Ganglion,Effector T cells,Embryonic stem cells,Epidermis,Heart,Hippocampus,Hypothalamus,Immune cells not otherwise specified,Kidney,Large Intestine,Liver,Lung,Lymphocytes not otherwise specified,Mammary Gland,Murine NKT cells,Olfactory Bulb,Other Cells,Othe…
rno-miR-132-3p	TargetScan Human	Moderate (predicted)	APLP2	amyloid beta (A4) precursor-like protein 2	Cancer,Connective Tissue Disorders,Developmental Disorder,Gastrointestinal Disease,Immunological Disease,Inflammatory Disease,Metabolic Disease,Neurological Disease,Organismal Injury and Abnormalities,Psychological Disorders,Respiratory Disease,Skeletal and Muscular Disorders	Cytoplasm	other		Human,Mouse,Rat	Adipose,Amygdala,B lymphocytes not otherwise specified,Bladder,Brain,Cerebellum,Cerebral Cortex,Cortical neurons,Cytotoxic T cells,Dorsal Root Ganglion,Effector T cells,Epidermis,Heart,Hippocampus,Hypothalamus,Kidney,Large Intestine,Liver,Lung,Mammary Gland,Memory B cells,Naive B cells,Neurons not otherwise specified,Olfactory Bulb,Ovary,Pancreas,Peripheral blood lymphocytes,Pituitary Gland,Place…
rno-miR-132-3p	TargetScan Human	Moderate (predicted)	APOA1BP	apolipoprotein A-I binding protein	Cancer,Endocrine System Disorders,Gastrointestinal Disease	Extracellular Space	enzyme	NADH Repair	Human,Mouse,Rat	Adipose,Amygdala,B lymphocytes not otherwise specified,Bladder,Cerebellum,Cerebral Cortex,Cytotoxic T cells,Dorsal Root Ganglion,Effector T cells,Epidermis,Heart,Hippocampus,Hypothalamus,Kidney,Large Intestine,Liver,Lung,Mammary Gland,Murine NKT cells,Olfactory Bulb,Ovary,Pituitary Gland,Placenta,Prostate Gland,Retina,Salivary Gland,Skeletal Muscle,Small Intestine,Spleen,Stomach,Substantia Nigra,…
rno-miR-132-3p	Ingenuity Expert Findings,TarBase,TargetScan Human,miRecords	Experimentally Observed,High (predicted)	ARHGAP32	Rho GTPase activating protein 32	Cancer,Endocrine System Disorders,Gastrointestinal Disease,Hereditary Disorder,Infectious Disease,Neurological Disease,Psychological Disorders,Reproductive System Disease,Skeletal and Muscular Disorders	Cytoplasm	other		Human,Mouse,Rat	Amygdala,Brain,Cerebellum,Cerebral Cortex,Dorsal Root Ganglion,Epidermis,Hippocampus,Hypothalamus,Kidney,Large Intestine,Mammary Gland,Olfactory Bulb,Ovary,Pancreas,Pituitary Gland,Prostate Gland,Salivary Gland,Small Intestine,Spleen,Stomach,Testis,Thalamus,Thymus,Uterus,HCC-2998,HCT-116,HT29,KM-12,NCI-H332M
rno-miR-132-3p	TargetScan Human	Moderate (predicted)	BCL10	B-cell CLL/lymphoma 10	Antimicrobial Response,Cancer,Connective Tissue Disorders,Dermatological Diseases and Conditions,Developmental Disorder,Endocrine System Disorders,Gastrointestinal Disease,Hematological Disease,Immunological Disease,Infectious Disease,Inflammatory Response,Neurological Disease,Organismal Injury and Abnormalities,Reproductive System Disease,Skeletal and Muscular Disorders	Cytoplasm	transcription regulator	B Cell Receptor Signaling,CD28 Signaling in T Helper Cells,NF-κB Signaling,PI3K Signaling in B Lymphocytes,PKCθ Signaling in T Lymphocytes,Regulation of IL-2 Expression in Activated and Anergic T Lymphocytes,T Cell Receptor Signaling	Human,Mouse,Rat	Activated CD56bright NK cells,Activated CD56dim NK cells,Activated helper T cells,Activated Vd1 Gamma-delta T cells,Activated Vd2 Gamma-delta T cells,Adipose,Amygdala,B lymphocytes not otherwise specified,BDCA-1+ dendritic cells,BDCA-3+ dendritic cells,Bladder,Brain,Central memory cytotoxic T cells,Central memory helper T cells,Cerebellum,Cerebral Cortex,Cytotoxic T cells,Dorsal Root Ganglion,Eff…
rno-miR-132-3p	TargetScan Human	Moderate (predicted)	BMPER	BMP binding endothelial regulator	Cancer,Cardiovascular Disease,Connective Tissue Disorders,Developmental Disorder,Endocrine System Disorders,Hematological Disease,Hereditary Disorder,Immunological Disease,Neurological Disease,Organismal Injury and Abnormalities,Reproductive System Disease,Skeletal and Muscular Disorders	Extracellular Space	other		Human,Mouse,Rat	Adipose,Amygdala,Bladder,Brain,Cerebral Cortex,Dorsal Root Ganglion,Endothelial cells not otherwise specified,Epidermis,Granulosa cells,Heart,Hippocampus,Hypothalamus,Large Intestine,Liver,Lung,Ovary,Pituitary Gland,Placenta,Retina,Skeletal Muscle,Skin,Smooth Muscle,Spleen,Substantia Nigra,Testis,Uterus,Vascular smooth muscle cells,BT-549,EKVX,HeLa,HOP-62,HS 578T,NCI-H226,Other Cell Line,SF-268,S…
rno-miR-132-3p	TargetScan Human	High (predicted)	BRCA1	breast cancer 1, early onset	Cancer,Connective Tissue Disorders,Dermatological Diseases and Conditions,Developmental Disorder,Endocrine System Disorders,Gastrointestinal Disease,Hematological Disease,Hepatic System Disease,Hereditary Disorder,Immunological Disease,Infectious Disease,Metabolic Disease,Neurological Disease,Organismal Injury and Abnormalities,Psychological Disorders,Renal and Urological Disease,Reproductive Sys…	Nucleus	transcription regulator	ATM Signaling,Cell Cycle: G2/M DNA Damage Checkpoint Regulation,DNA damage-induced 14-3-3σ Signaling,DNA Double-Strand Break Repair by Homologous Recombination,GADD45 Signaling,Hereditary Breast Cancer Signaling,Molecular Mechanisms of Cancer,Ovarian Cancer Signaling,p53 Signaling,Protein Ubiquitination Pathway,Role of BRCA1 in DNA Damage Response,Role of CHK Proteins in Cell Cycle Checkpoint Con…	Human,Mouse,Rat	Adipocytes,Adipose,Amygdala,B lymphocytes not otherwise specified,Bladder,Brain,Cerebellum,Cerebral Cortex,Cytotoxic T cells,Dorsal Root Ganglion,Effector T cells,Endothelial cells not otherwise specified,Epidermis,Heart,Hippocampus,Hypothalamus,Immune cells not otherwise specified,Kidney,Large Intestine,Liver,Lung,Mammary Gland,Memory B cells,Naive B cells,Olfactory Bulb,Other Cells,Other Organ …
rno-miR-132-3p	TargetScan Human	High (predicted)	BTG2	BTG family, member 2	Cancer,Cardiovascular Disease,Developmental Disorder,Endocrine System Disorders,Gastrointestinal Disease,Hematological Disease,Immunological Disease,Infectious Disease,Metabolic Disease,Neurological Disease,Organismal Injury and Abnormalities,Psychological Disorders,Renal and Urological Disease,Reproductive System Disease,Skeletal and Muscular Disorders,Tumor Morphology	Nucleus	transcription regulator	Cell Cycle Regulation by BTG Family Proteins	Human,Mouse,Rat	Adipose,Adrenal Gland,B lymphocytes not otherwise specified,Bladder,Brain,Cytotoxic T cells,Effector T cells,Endothelial cells not otherwise specified,Epidermis,Heart,Hypothalamus,Kidney,Large Intestine,Lung,Mammary Gland,Memory B cells,Murine NKT cells,Naive B cells,Olfactory Bulb,Organ Systems not otherwise specified,Other Epithelial cells,Other Organ Systems,Other Tissues and Primary Cells,Ova…
rno-miR-132-3p	TargetScan Human	High (predicted)	C11orf87	chromosome 11 open reading frame 87	Cancer,Endocrine System Disorders,Gastrointestinal Disease,Organismal Injury and Abnormalities,Renal and Urological Disease	Other	other		Human,Mouse,Rat	Adipose,Amygdala,B lymphocytes not otherwise specified,Bladder,Cerebellum,Cerebral Cortex,Cytotoxic T cells,Dorsal Root Ganglion,Epidermis,Hippocampus,Hypothalamus,Lung,Olfactory Bulb,Ovary,Pituitary Gland,Placenta,Prostate Gland,Retina,Skeletal Muscle,Spleen,Substantia Nigra,Uterus,HS 578T,SF-268,SK-MEL-2
rno-miR-132-3p	TargetScan Human	High (predicted)	C8orf44-SGK3/SGK3	serum/glucocorticoid regulated kinase family, member 3	Cancer,Dermatological Diseases and Conditions,Endocrine System Disorders,Gastrointestinal Disease,Organismal Injury and Abnormalities,Reproductive System Disease	Cytoplasm	kinase		Human,Mouse,Rat	Activated Vd1 Gamma-delta T cells,Activated Vd2 Gamma-delta T cells,Adipose,Amygdala,B lymphocytes not otherwise specified,BDCA-1+ dendritic cells,BDCA-3+ dendritic cells,Bladder,Brain,Central memory cytotoxic T cells,Cerebellum,Cerebral Cortex,Cytotoxic T cells,Dorsal Root Ganglion,Effector memory cytotoxic T cells,Effector memory RA+ cytotoxic T cells,Effector T cells,Epidermis,Heart,Hippocampu…
rno-miR-132-3p	TargetScan Human	High (predicted)	CAMTA1	calmodulin binding transcription activator 1	Cancer,Cardiovascular Disease,Developmental Disorder,Endocrine System Disorders,Gastrointestinal Disease,Hematological Disease,Hepatic System Disease,Hereditary Disorder,Immunological Disease,Metabolic Disease,Neurological Disease,Organismal Injury and Abnormalities	Other	other		Human,Mouse,Rat	Activated helper T cells,Adipose,Amygdala,B lymphocytes not otherwise specified,BDCA-1+ dendritic cells,BDCA-3+ dendritic cells,Central memory cytotoxic T cells,Central memory helper T cells,Cerebellum,Cerebral Cortex,Dorsal Root Ganglion,Effector memory cytotoxic T cells,Effector memory RA+ cytotoxic T cells,Epidermis,Heart,Hippocampus,Hypothalamus,Immature monocyte-derived dendritic cells,Kidne…
rno-miR-132-3p	TargetScan Human	Moderate (predicted)	CAPSL	calcyphosine-like	Cancer,Endocrine System Disorders,Gastrointestinal Disease,Immunological Disease,Metabolic Disease	Other	other		Human,Mouse,Rat	Adipose,Bladder,Large Intestine,Lung,Ovary,Pituitary Gland,Testis
rno-miR-132-3p	TargetScan Human	Moderate (predicted)	CASP7	caspase 7, apoptosis-related cysteine peptidase	Cancer,Connective Tissue Disorders,Developmental Disorder,Gastrointestinal Disease,Hematological Disease,Hepatic System Disease,Hereditary Disorder,Immunological Disease,Inflammatory Disease,Inflammatory Response,Metabolic Disease,Neurological Disease,Organismal Injury and Abnormalities,Psychological Disorders,Skeletal and Muscular Disorders	Cytoplasm	peptidase	Amyotrophic Lateral Sclerosis Signaling,Apoptosis Signaling,Cytotoxic T Lymphocyte-mediated Apoptosis of Target Cells,Death Receptor Signaling,Endoplasmic Reticulum Stress Pathway,Endothelin-1 Signaling,Huntington's Disease Signaling,Molecular Mechanisms of Cancer,PEDF Signaling,Sphingosine-1-phosphate Signaling,TNFR1 Signaling,Tumoricidal Function of Hepatic Natural Killer Cells,TWEAK Signaling	Human,Mouse,Rat	Adipose,Amygdala,B lymphocytes not otherwise specified,Bladder,Brain,Cerebellum,Cerebral Cortex,Cytotoxic T cells,Dorsal Root Ganglion,Effector T cells,Epidermis,Granule cells,Heart,Hippocampus,Hypothalamus,Kidney,Large Intestine,Lens,Liver,Lung,Mammary Gland,Memory B cells,Murine NKT cells,Naive B cells,Olfactory Bulb,Other Cells,Other Organ Systems,Ovary,Pituitary Gland,Placenta,Prostate Gland,…
rno-miR-132-3p	TargetScan Human	Moderate (predicted)	CC2D2A	coiled-coil and C2 domain containing 2A	Cancer,Developmental Disorder,Gastrointestinal Disease,Hepatic System Disease,Hereditary Disorder,Neurological Disease,Organismal Injury and Abnormalities,Renal and Urological Disease,Reproductive System Disease,Skeletal and Muscular Disorders	Other	other		Human,Mouse,Rat	Adipose,Amygdala,Bladder,Cerebellum,Cerebral Cortex,Dorsal Root Ganglion,Epidermis,Heart,Hippocampus,Hypothalamus,Kidney,Large Intestine,Lung,Olfactory Bulb,Ovary,Pituitary Gland,Prostate Gland,Retina,Skeletal Muscle,Stomach,Substantia Nigra,Uterus,A549-ATCC,ACHN,BT-549,CAKI-1,DU-145,H460,HCT-116,HCT-15,HOP-92,HS 578T,IGROV1,LOX IMVI,MALME-3M,MCF7,MDA-MB-231,MDA-MB-435,MOLT-4,NCI-ADR-RES,NCI-H23,…
rno-miR-132-3p	TargetScan Human	Moderate (predicted)	CCNG1	cyclin G1	Cancer,Endocrine System Disorders,Gastrointestinal Disease,Hepatic System Disease,Metabolic Disease,Organismal Injury and Abnormalities,Reproductive System Disease,Tumor Morphology	Nucleus	other	p53 Signaling	Human,Mouse,Rat	Adipose,Amygdala,B lymphocytes not otherwise specified,Bladder,Cerebellum,Cerebral Cortex,Cytotoxic T cells,Dorsal Root Ganglion,Effector T cells,Epidermis,Heart,Hippocampus,Hypothalamus,Kidney,Large Intestine,Liver,Lung,Mammary Gland,Murine NKT cells,Olfactory Bulb,Ovary,Pancreas,Pituitary Gland,Placenta,Prostate Gland,Retina,Salivary Gland,Skeletal Muscle,Small Intestine,Spleen,Stomach,Substant…
rno-miR-132-3p	TargetScan Human	High (predicted)	CDKN1A	cyclin-dependent kinase inhibitor 1A (p21, Cip1)	Cancer,Cardiovascular Disease,Connective Tissue Disorders,Dermatological Diseases and Conditions,Developmental Disorder,Endocrine System Disorders,Gastrointestinal Disease,Hematological Disease,Hepatic System Disease,Hereditary Disorder,Hypersensitivity Response,Immunological Disease,Inflammatory Disease,Inflammatory Response,Metabolic Disease,Neurological Disease,Nutritional Disease,Ophthalmic D…	Nucleus	kinase	Antiproliferative Role of Somatostatin Receptor 2,Aryl Hydrocarbon Receptor Signaling,ATM Signaling,Bladder Cancer Signaling,Breast Cancer Regulation by Stathmin1,Cell Cycle: G1/S Checkpoint Regulation,Cell Cycle: G2/M DNA Damage Checkpoint Regulation,Chronic Myeloid Leukemia Signaling,Cyclins and Cell Cycle Regulation,Estrogen-mediated S-phase Entry,GADD45 Signaling,Glioblastoma Multiforme Signa…	Human,Mouse,Rat	Adipose,Amygdala,Astrocytes,B lymphocytes not otherwise specified,Bladder,Brain,CD34+ cells,Cerebellum,Cerebral Cortex,Cytotoxic T cells,Dermis,Dorsal Root Ganglion,Effector T cells,Embryonic stem cells,Endothelial cells not otherwise specified,Epidermis,Esophagus,Fibroblasts,Granulocytes not otherwise specified,Heart,Hematopoietic progenitor cells,Hepatocytes,Hippocampus,HUVEC cells,Hypothalamus…
rno-miR-132-3p	TargetScan Human	Moderate (predicted)	CENPJ	centromere protein J	Cancer,Connective Tissue Disorders,Developmental Disorder,Hereditary Disorder,Neurological Disease,Organismal Injury and Abnormalities,Reproductive System Disease,Skeletal and Muscular Disorders	Nucleus	transcription regulator		Human,Mouse,Rat	Activated helper T cells,Adipose,B lymphocytes not otherwise specified,BDCA-1+ dendritic cells,BDCA-3+ dendritic cells,Brain,Central memory cytotoxic T cells,Cytotoxic T cells,Dorsal Root Ganglion,Effector memory cytotoxic T cells,Effector memory RA+ cytotoxic T cells,Effector T cells,Heart,Hypothalamus,Immature monocyte-derived dendritic cells,Kidney,Large Intestine,Lung,Mammary Gland,Mature mon…
rno-miR-132-3p	TargetScan Human	High (predicted)	CFL2	cofilin 2 (muscle)	Cancer,Developmental Disorder,Gastrointestinal Disease,Hepatic System Disease,Hereditary Disorder,Organismal Injury and Abnormalities,Skeletal and Muscular Disorders	Extracellular Space	other	Actin Cytoskeleton Signaling,Axonal Guidance Signaling,B Cell Receptor Signaling,CCR3 Signaling in Eosinophils,Cdc42 Signaling,Ephrin A Signaling,Ephrin B Signaling,Ephrin Receptor Signaling,Germ Cell-Sertoli Cell Junction Signaling,ILK Signaling,PAK Signaling,Rac Signaling,RhoA Signaling,RhoGDI Signaling,Role of Tissue Factor in Cancer,Semaphorin Signaling in Neurons,Signaling by Rho Family GTPa…	Human,Mouse,Rat	Adipose,Amygdala,B lymphocytes not otherwise specified,Bladder,Brain,Cerebellum,Cerebral Cortex,Cytotoxic T cells,Dorsal Root Ganglion,Effector T cells,Epidermis,Heart,Hippocampus,Hypothalamus,Kidney,Large Intestine,Liver,Lung,Mammary Gland,Murine NKT cells,Olfactory Bulb,Other Cells,Other Organ Systems,Ovary,Pituitary Gland,Placenta,Prostate Gland,Retina,Skeletal Muscle,Spleen,Stomach,Substantia…
rno-miR-132-3p	TargetScan Human	High (predicted)	CLASP2	cytoplasmic linker associated protein 2	Cancer,Endocrine System Disorders,Gastrointestinal Disease,Hepatic System Disease	Cytoplasm	other		Human,Mouse,Rat	Activated CD56bright NK cells,Activated CD56dim NK cells,Activated helper T cells,Activated Vd1 Gamma-delta T cells,Activated Vd2 Gamma-delta T cells,Adipose,Amygdala,BDCA-1+ dendritic cells,BDCA-3+ dendritic cells,CD56bright NK cells,CD56dim NK cells,Central memory cytotoxic T cells,Central memory helper T cells,Cerebellum,Cerebral Cortex,Cytotoxic T cells,Dorsal Root Ganglion,Effector memory cy…
rno-miR-132-3p	TargetScan Human	High (predicted)	CNOT2	CCR4-NOT transcription complex, subunit 2	Cancer,Endocrine System Disorders,Organismal Injury and Abnormalities,Reproductive System Disease	Nucleus	transcription regulator		Human,Mouse,Rat	Activated CD56bright NK cells,Activated CD56dim NK cells,Activated helper T cells,Activated Vd1 Gamma-delta T cells,Activated Vd2 Gamma-delta T cells,Adipose,Amygdala,B lymphocytes not otherwise specified,BDCA-1+ dendritic cells,BDCA-3+ dendritic cells,Bladder,CD56bright NK cells,CD56dim NK cells,Central memory cytotoxic T cells,Central memory helper T cells,Cerebellum,Cerebral Cortex,Cytotoxic T…
rno-miR-132-3p	TargetScan Human	High (predicted)	COA5	cytochrome c oxidase assembly factor 5	Cardiovascular Disease,Developmental Disorder,Hereditary Disorder,Metabolic Disease,Organismal Injury and Abnormalities,Skeletal and Muscular Disorders	Cytoplasm	other		Human,Mouse,Rat	Adipose,Amygdala,B lymphocytes not otherwise specified,BDCA-1+ dendritic cells,BDCA-3+ dendritic cells,Bladder,Central memory cytotoxic T cells,Cerebellum,Cerebral Cortex,Cytotoxic T cells,Dorsal Root Ganglion,Effector memory cytotoxic T cells,Effector memory RA+ cytotoxic T cells,Effector T cells,Epidermis,Heart,Hippocampus,Hypothalamus,Immature monocyte-derived dendritic cells,Kidney,Large Inte…
rno-miR-132-3p	TargetScan Human	Moderate (predicted)	COL11A1	collagen, type XI, alpha 1	Cancer,Connective Tissue Disorders,Dermatological Diseases and Conditions,Developmental Disorder,Endocrine System Disorders,Gastrointestinal Disease,Hepatic System Disease,Hereditary Disorder,Inflammatory Disease,Neurological Disease,Ophthalmic Disease,Organismal Injury and Abnormalities,Respiratory Disease,Skeletal and Muscular Disorders,Tumor Morphology	Extracellular Space	other	Hepatic Fibrosis / Hepatic Stellate Cell Activation	Human,Mouse,Rat	Bladder,Brain,Cartilage Tissue,Cerebellum,Chondrocytes,Dorsal Root Ganglion,Epidermis,Hippocampus,Hypothalamus,Monocyte-derived macrophage,Monocytes not otherwise specified,Olfactory Bulb,Ovary,Pituitary Gland,Placenta,Retina,Substantia Nigra,Testis,Trachea,H460,MALME-3M,NCI-H522,Other Cell Line,OVCAR-3,RXF-393,SK-MEL-28,SNB-19,SNB-75,THP-1,U251,UACC-257
rno-miR-132-3p	TargetScan Human	High (predicted)	CREB5	cAMP responsive element binding protein 5	Cancer,Cardiovascular Disease,Endocrine System Disorders,Gastrointestinal Disease,Hepatic System Disease,Metabolic Disease	Nucleus	transcription regulator	ATM Signaling,B Cell Receptor Signaling,Calcium Signaling,cAMP-mediated signaling,Circadian Rhythm Signaling,Corticotropin Releasing Hormone Signaling,CREB Signaling in Neurons,Dendritic Cell Maturation,Dopamine-DARPP32 Feedback in cAMP Signaling,Ephrin Receptor Signaling,ERK/MAPK Signaling,ERK5 Signaling,Estrogen-Dependent Breast Cancer Signaling,FGF Signaling,FLT3 Signaling in Hematopoietic Pro…	Human,Mouse,Rat	Adipose,Amygdala,B lymphocytes not otherwise specified,BDCA-1+ dendritic cells,BDCA-3+ dendritic cells,Cerebellum,Cerebral Cortex,Dorsal Root Ganglion,Epidermis,Heart,Hippocampus,Hypothalamus,Immature monocyte-derived dendritic cells,Large Intestine,Lung,Mammary Gland,Mature monocyte-derived dendritic cells,Monocyte-derived macrophage,Ovary,Pituitary Gland,Placenta,Plasmacytoid dendritic cells,Pr…
rno-miR-132-3p	TargetScan Human	High (predicted)	CTGF	connective tissue growth factor	Cancer,Cardiovascular Disease,Connective Tissue Disorders,Developmental Disorder,Endocrine System Disorders,Gastrointestinal Disease,Hematological Disease,Hepatic System Disease,Hereditary Disorder,Infectious Disease,Inflammatory Disease,Inflammatory Response,Metabolic Disease,Neurological Disease,Ophthalmic Disease,Organismal Injury and Abnormalities,Psychological Disorders,Renal and Urological …	Extracellular Space	growth factor	Hepatic Fibrosis / Hepatic Stellate Cell Activation,IGF-1 Signaling,Role of Tissue Factor in Cancer	Human,Mouse,Rat	Adipose,Amygdala,Bladder,Brain,Brainstem,Cartilage Tissue,Caudate Nucleus,Cerebellum,Cerebral Cortex,Chondrocytes,Cornea,Corpus Callosum,Dorsal Root Ganglion,Endothelial cells not otherwise specified,Epidermis,Fibroblasts,Granulocytes not otherwise specified,Heart,Hematopoietic progenitor cells,Hippocampus,Hypothalamus,Kidney,Large Intestine,Lens,Liver,Lung,Mammary Gland,Medulla Oblongata,Mesench…
rno-miR-132-3p	TargetScan Human	High (predicted)	DCAF8	DDB1 and CUL4 associated factor 8	Cancer,Cardiovascular Disease,Endocrine System Disorders,Gastrointestinal Disease,Hepatic System Disease,Organismal Injury and Abnormalities,Reproductive System Disease	Other	other		Human,Mouse,Rat	Activated helper T cells,Adipose,Amygdala,B lymphocytes not otherwise specified,BDCA-1+ dendritic cells,BDCA-3+ dendritic cells,Bladder,Central memory cytotoxic T cells,Cerebellum,Cerebral Cortex,Cytotoxic T cells,Dorsal Root Ganglion,Effector memory cytotoxic T cells,Effector memory RA+ cytotoxic T cells,Effector T cells,Epidermis,Heart,Hippocampus,Hypothalamus,Kidney,Large Intestine,Liver,Lung,…
rno-miR-132-3p	TargetScan Human	High (predicted)	DYRK2	dual-specificity tyrosine-(Y)-phosphorylation regulated kinase 2	Cancer,Endocrine System Disorders,Gastrointestinal Disease,Organismal Injury and Abnormalities,Reproductive System Disease,Tumor Morphology	Cytoplasm	kinase		Human,Mouse,Rat	Adipose,Amygdala,B lymphocytes not otherwise specified,Bladder,Cerebellum,Cerebral Cortex,Cytotoxic T cells,Dorsal Root Ganglion,Effector T cells,Epidermis,Heart,Hippocampus,Hypothalamus,Kidney,Large Intestine,Liver,Lung,Mammary Gland,Memory B cells,Naive B cells,Olfactory Bulb,Ovary,Pancreas,Pituitary Gland,Placenta,Prostate Gland,Retina,Salivary Gland,Skeletal Muscle,Small Intestine,Spleen,Stom…
rno-miR-132-3p	TargetScan Human	High (predicted)	E2F5	E2F transcription factor 5, p130-binding	Cancer,Developmental Disorder,Endocrine System Disorders,Gastrointestinal Disease,Hepatic System Disease,Neurological Disease,Organismal Injury and Abnormalities,Psychological Disorders	Nucleus	transcription regulator	Breast Cancer Regulation by Stathmin1,Cell Cycle Regulation by BTG Family Proteins,Cell Cycle: G1/S Checkpoint Regulation,Chronic Myeloid Leukemia Signaling,Cyclins and Cell Cycle Regulation,Estrogen-mediated S-phase Entry,Glioblastoma Multiforme Signaling,Glioma Signaling,Molecular Mechanisms of Cancer,Pancreatic Adenocarcinoma Signaling,Role of BRCA1 in DNA Damage Response,Role of CHK Proteins …	Human,Mouse,Rat	Adipose,Amygdala,B lymphocytes not otherwise specified,Bladder,Cerebellum,Cerebral Cortex,Crypt,Cytotoxic T cells,Dermis,Dorsal Root Ganglion,Effector T cells,Epidermis,Heart,Hippocampus,Hypothalamus,Keratinocytes,Kidney,Large Intestine,Liver,Lung,Mammary Gland,Memory B cells,Murine NKT cells,Naive B cells,Olfactory Bulb,Other Organ Systems,Ovary,Pituitary Gland,Placenta,Prostate Gland,Retina,Sal…
rno-miR-132-3p	TargetScan Human	Moderate (predicted)	EDNRA	endothelin receptor type A	Cancer,Cardiovascular Disease,Connective Tissue Disorders,Dental Disease,Dermatological Diseases and Conditions,Developmental Disorder,Endocrine System Disorders,Gastrointestinal Disease,Hematological Disease,Hepatic System Disease,Hereditary Disorder,Immunological Disease,Infectious Disease,Inflammatory Disease,Inflammatory Response,Metabolic Disease,Neurological Disease,Organismal Injury and Ab…	Plasma Membrane	transmembrane receptor	Endothelin-1 Signaling,Hepatic Fibrosis / Hepatic Stellate Cell Activation,Ovarian Cancer Signaling	Human,Mouse,Rat	Adipocytes,Adipose,Adrenal Gland,Brain,Crypt,Dermis,Endothelial cells not otherwise specified,Heart,Kidney,Large Intestine,Lung,Macrophages not otherwise specified,Melanocytes,Neurons not otherwise specified,Other Cells,Other Endothelial cells,Other Nervous System,Other Organ Systems,Other Tissues and Primary Cells,Ovary,Pancreas,PBMCs,Pituitary Gland,Placenta,Skin,Smooth Muscle,Smooth muscle cel…
rno-miR-132-3p	TargetScan Human	High (predicted)	EGR1	early growth response 1	Cancer,Cardiovascular Disease,Connective Tissue Disorders,Dermatological Diseases and Conditions,Developmental Disorder,Endocrine System Disorders,Gastrointestinal Disease,Hematological Disease,Hepatic System Disease,Hereditary Disorder,Hypersensitivity Response,Immunological Disease,Infectious Disease,Inflammatory Disease,Inflammatory Response,Neurological Disease,Organismal Injury and Abnormali…	Nucleus	transcription regulator	B Cell Receptor Signaling,CDK5 Signaling,CXCR4 Signaling,GNRH Signaling,Regulation of the Epithelial-Mesenchymal Transition Pathway,Role of Tissue Factor in Cancer	Human,Mouse,Rat	Adipose,Amygdala,B lymphocytes not otherwise specified,Bladder,Bone marrow cells not otherwise specified,Brain,Cerebellum,Cerebral Cortex,Cortical neurons,Cytotoxic T cells,Effector T cells,Endothelial cells not otherwise specified,Epidermis,Granule cells,Heart,Hematopoietic progenitor cells,Hippocampus,Hypothalamus,Kidney,Large Intestine,Liver,Lung,Megakaryocytes,Mesenchymal stem cells,Murine NK…
rno-miR-132-3p	TargetScan Human	High (predicted)	EP300	E1A binding protein p300	Cancer,Cardiovascular Disease,Connective Tissue Disorders,Developmental Disorder,Endocrine System Disorders,Gastrointestinal Disease,Hematological Disease,Hepatic System Disease,Hereditary Disorder,Immunological Disease,Infectious Disease,Inflammatory Disease,Inflammatory Response,Metabolic Disease,Neurological Disease,Ophthalmic Disease,Organismal Injury and Abnormalities,Renal and Urological Di…	Nucleus	transcription regulator	Androgen Signaling,Aryl Hydrocarbon Receptor Signaling,ATM Signaling,B Cell Receptor Signaling,Calcium Signaling,Calcium-induced T Lymphocyte Apoptosis,cAMP-mediated signaling,Cardiac Hypertrophy Signaling,Cell Cycle: G2/M DNA Damage Checkpoint Regulation,Circadian Rhythm Signaling,Corticotropin Releasing Hormone Signaling,CREB Signaling in Neurons,Dendritic Cell Maturation,Dopamine-DARPP32 Feedb…	Human,Mouse,Rat	Adrenal Gland,Brain,Cerebellum,Heart,Hematopoietic progenitor cells,HUVEC cells,Hypothalamus,Kidney,Liver,Lung,Megakaryocytes,Memory B cells,Naive B cells,Other Organ Systems,Other Tissues and Primary Cells,Pituitary Gland,Spleen,Stomach,Testis,Thyroid Gland,COLO205,HCT-15,HeLa,HL-60,HOP-62,HT29,IGROV1,J774,K-562,KM-12,MALME-3M,NCI-ADR-RES,NCI-H226,NCI-H332M,Other Cell Line,Other Colon Cancer Cel…
rno-miR-132-3p	TargetScan Human	High (predicted)	EPB41	erythrocyte membrane protein band 4.1	Cancer,Connective Tissue Disorders,Endocrine System Disorders,Hematological Disease,Hereditary Disorder	Plasma Membrane	other	Sertoli Cell-Sertoli Cell Junction Signaling,Tight Junction Signaling	Human,Mouse,Rat	Activated helper T cells,Adipose,B lymphocytes not otherwise specified,BDCA-1+ dendritic cells,BDCA-3+ dendritic cells,Bladder,Brain,Central memory cytotoxic T cells,Cerebellum,Cerebral Cortex,Cytotoxic T cells,Dorsal Root Ganglion,Effector memory cytotoxic T cells,Effector memory RA+ cytotoxic T cells,Effector T cells,Epidermis,Granule cells,Heart,Hematopoietic progenitor cells,Hippocampus,Hypot…
rno-miR-132-3p	TargetScan Human	Moderate (predicted)	EPHB2	EPH receptor B2	Auditory Disease,Cancer,Connective Tissue Disorders,Developmental Disorder,Endocrine System Disorders,Gastrointestinal Disease,Hereditary Disorder,Infectious Disease,Neurological Disease,Organismal Injury and Abnormalities,Psychological Disorders,Renal and Urological Disease,Reproductive System Disease,Skeletal and Muscular Disorders	Plasma Membrane	kinase	Axonal Guidance Signaling,Clathrin-mediated Endocytosis Signaling,Ephrin B Signaling,Ephrin Receptor Signaling	Human,Mouse,Rat	Amygdala,Bladder,Brain,CD34+ cells,Cerebellum,Cerebral Cortex,Cerebral Ventricles,Cytotoxic T cells,Dorsal Root Ganglion,Effector T cells,Endothelial cells not otherwise specified,Epidermis,Fibroblasts,Heart,Hematopoietic progenitor cells,Hippocampus,Hypothalamus,Kidney,Large Intestine,Liver,Lung,Macrophages not otherwise specified,Mammary Gland,Microvascular endothelial cells,Monocyte-derived ma…
rno-miR-132-3p	TargetScan Human	Moderate (predicted)	EPN2	epsin 2	Cancer,Developmental Disorder,Gastrointestinal Disease,Infectious Disease,Nutritional Disease	Cytoplasm	other	Epithelial Adherens Junction Signaling,Germ Cell-Sertoli Cell Junction Signaling,Sertoli Cell-Sertoli Cell Junction Signaling	Human,Mouse,Rat	Adipose,Amygdala,Bladder,Cerebellum,Cerebral Cortex,Dorsal Root Ganglion,Epidermis,Heart,Hippocampus,Hypothalamus,Kidney,Large Intestine,Lung,Olfactory Bulb,Ovary,Pituitary Gland,Placenta,Prostate Gland,Retina,Skeletal Muscle,Substantia Nigra,Testis,Uterus,RAW 264.7,SN12C
rno-miR-132-3p	TargetScan Human	High (predicted)	FBXO28	F-box protein 28	Cancer,Endocrine System Disorders,Gastrointestinal Disease,Metabolic Disease	Other	other		Human,Mouse,Rat	Activated CD56bright NK cells,Activated CD56dim NK cells,Activated helper T cells,Activated Vd1 Gamma-delta T cells,Activated Vd2 Gamma-delta T cells,Adipose,Amygdala,B lymphocytes not otherwise specified,BDCA-1+ dendritic cells,BDCA-3+ dendritic cells,Bladder,CD56bright NK cells,Central memory cytotoxic T cells,Central memory helper T cells,Cerebellum,Cerebral Cortex,Cytotoxic T cells,Dorsal Roo…
rno-miR-132-3p	TargetScan Human	High (predicted)	FBXW7	F-box and WD repeat domain containing 7, E3 ubiquitin protein ligase	Cancer,Cardiovascular Disease,Dermatological Diseases and Conditions,Developmental Disorder,Endocrine System Disorders,Gastrointestinal Disease,Hematological Disease,Hepatic System Disease,Hereditary Disorder,Immunological Disease,Neurological Disease,Organismal Injury and Abnormalities,Psychological Disorders,Renal and Urological Disease,Reproductive System Disease,Respiratory Disease,Skeletal a…	Nucleus	transcription regulator	Adipogenesis pathway,Protein Ubiquitination Pathway	Human,Mouse,Rat	Activated helper T cells,Adipose,Amygdala,B lymphocytes not otherwise specified,BDCA-1+ dendritic cells,BDCA-3+ dendritic cells,Bladder,Brain,Central memory cytotoxic T cells,Cerebellum,Cerebral Cortex,Crypt,Cytotoxic T cells,Dorsal Root Ganglion,Effector memory cytotoxic T cells,Effector memory RA+ cytotoxic T cells,Effector T cells,Epidermis,Heart,Hippocampus,Hypothalamus,Immature monocyte-deri…
rno-miR-132-3p	TargetScan Human	High (predicted)	FOXO1	forkhead box O1	Cancer,Cardiovascular Disease,Connective Tissue Disorders,Dermatological Diseases and Conditions,Developmental Disorder,Endocrine System Disorders,Gastrointestinal Disease,Hematological Disease,Hepatic System Disease,Immunological Disease,Inflammatory Disease,Inflammatory Response,Metabolic Disease,Neurological Disease,Nutritional Disease,Organismal Injury and Abnormalities,Renal and Urological D…	Nucleus	transcription regulator	14-3-3-mediated Signaling,Adipogenesis pathway,Angiopoietin Signaling,B Cell Receptor Signaling,Cell Cycle: G1/S Checkpoint Regulation,Docosahexaenoic Acid (DHA) Signaling,ErbB Signaling,ErbB2-ErbB3 Signaling,FXR/RXR Activation,Glioblastoma Multiforme Signaling,HER-2 Signaling in Breast Cancer,Human Embryonic Stem Cell Pluripotency,IGF-1 Signaling,IL-3 Signaling,Insulin Receptor Signaling,Leptin …	Human,Mouse,Rat	Adipocytes,Adipose,B lymphocytes not otherwise specified,Brain,Cerebellum,Cerebral Cortex,Cytotoxic T cells,Effector T cells,Endothelial cells not otherwise specified,Epidermis,Hematopoietic progenitor cells,Hippocampus,HUVEC cells,Hypothalamus,Large Intestine,Liver,Lung,Lymph node,Mammary Gland,Memory B cells,Naive B cells,Olfactory Bulb,Other Cells,Other Organ Systems,Other Tissues and Primary …
rno-miR-132-3p	TargetScan Human	Moderate (predicted)	FRMD6	FERM domain containing 6	Cancer,Developmental Disorder,Gastrointestinal Disease,Hepatic System Disease,Hereditary Disorder,Organismal Injury and Abnormalities,Renal and Urological Disease,Reproductive System Disease	Cytoplasm	other	HIPPO signaling	Human,Mouse,Rat	Activated helper T cells,Adipose,Amygdala,B lymphocytes not otherwise specified,Bladder,Cells not otherwise specified,Cerebellum,Cerebral Cortex,Cytotoxic T cells,Dorsal Root Ganglion,Effector memory cytotoxic T cells,Effector memory RA+ cytotoxic T cells,Effector T cells,Epidermis,Fibroblasts,Heart,Hippocampus,Hypothalamus,Immature monocyte-derived dendritic cells,Kidney,Large Intestine,Liver,Lu…
rno-miR-132-3p	TargetScan Human	High (predicted)	FRS2	fibroblast growth factor receptor substrate 2	Cancer,Developmental Disorder,Endocrine System Disorders,Infectious Disease,Ophthalmic Disease,Reproductive System Disease	Plasma Membrane	other	FGF Signaling,GDNF Family Ligand-Receptor Interactions,Neurotrophin/TRK Signaling,Regulation of the Epithelial-Mesenchymal Transition Pathway	Human,Mouse,Rat	Activated Vd1 Gamma-delta T cells,Amygdala,BDCA-1+ dendritic cells,BDCA-3+ dendritic cells,Brain,Central memory cytotoxic T cells,Cerebellum,Cerebral Cortex,Cytotoxic T cells,Dorsal Root Ganglion,Effector memory cytotoxic T cells,Effector memory RA+ cytotoxic T cells,Effector T cells,Epidermis,Heart,Hippocampus,Hypothalamus,Immature monocyte-derived dendritic cells,Kidney,Liver,Lung,Mature monocy…
rno-miR-132-3p	TargetScan Human	Moderate (predicted)	FUBP1	far upstream element (FUSE) binding protein 1	Cancer,Connective Tissue Disorders,Endocrine System Disorders,Gastrointestinal Disease,Hematological Disease,Immunological Disease,Infectious Disease,Inflammatory Disease,Neurological Disease,Organismal Injury and Abnormalities,Reproductive System Disease,Respiratory Disease,Skeletal and Muscular Disorders	Nucleus	transcription regulator		Human,Mouse,Rat	Activated CD56bright NK cells,Activated CD56dim NK cells,Activated helper T cells,Activated Vd1 Gamma-delta T cells,Activated Vd2 Gamma-delta T cells,Adipose,Amygdala,B lymphocytes not otherwise specified,BDCA-1+ dendritic cells,BDCA-3+ dendritic cells,Bladder,CD56bright NK cells,Central memory cytotoxic T cells,Central memory helper T cells,Cerebellum,Cerebral Cortex,Cytotoxic T cells,Dorsal Roo…
rno-miR-132-3p	TargetScan Human	High (predicted)	GDF5	growth differentiation factor 5	Cancer,Connective Tissue Disorders,Dermatological Diseases and Conditions,Developmental Disorder,Gastrointestinal Disease,Hepatic System Disease,Hereditary Disorder,Inflammatory Disease,Organismal Injury and Abnormalities,Reproductive System Disease,Skeletal and Muscular Disorders	Extracellular Space	growth factor		Human,Mouse,Rat	Adipose,Amygdala,B lymphocytes not otherwise specified,Bladder,Cerebellum,Cerebral Cortex,Cytotoxic T cells,Dorsal Root Ganglion,Effector T cells,Epidermis,Heart,Hippocampus,Hypothalamus,Kidney,Large Intestine,Liver,Lung,Mammary Gland,Olfactory Bulb,Other Tissues and Primary Cells,Ovary,Pancreas,Pituitary Gland,Placenta,Prostate Gland,Retina,Salivary Gland,Skeletal Muscle,Small Intestine,Spleen,S…
rno-miR-132-3p	TargetScan Human	High (predicted)	GSK3B	glycogen synthase kinase 3 beta	Antimicrobial Response,Cancer,Cardiovascular Disease,Connective Tissue Disorders,Dermatological Diseases and Conditions,Developmental Disorder,Endocrine System Disorders,Gastrointestinal Disease,Hematological Disease,Hepatic System Disease,Hereditary Disorder,Immunological Disease,Infectious Disease,Inflammatory Response,Metabolic Disease,Neurological Disease,Organismal Injury and Abnormalities,P…	Nucleus	kinase	14-3-3-mediated Signaling,Amyloid Processing,Axonal Guidance Signaling,B Cell Receptor Signaling,Basal Cell Carcinoma Signaling,Cardiac Hypertrophy Signaling,Cdc42 Signaling,Cell Cycle: G1/S Checkpoint Regulation,Colorectal Cancer Metastasis Signaling,Cyclins and Cell Cycle Regulation,Docosahexaenoic Acid (DHA) Signaling,EIF2 Signaling,Endometrial Cancer Signaling,ErbB Signaling,ErbB2-ErbB3 Signa…	Human,Mouse,Rat	Adipose,Amygdala,B lymphocytes not otherwise specified,Bladder,Cells not otherwise specified,Cerebellum,Cerebral Cortex,Cytotoxic T cells,Dorsal Root Ganglion,Effector T cells,Epidermis,Heart,Hippocampus,Hypothalamus,Kidney,Large Intestine,Liver,Lung,Mammary Gland,Memory B cells,Naive B cells,Neurons not otherwise specified,Olfactory Bulb,Other Stem cells,Ovary,Pancreas,Pituitary Gland,Placenta,P…
rno-miR-132-3p	TargetScan Human	High (predicted)	GTF2H1	general transcription factor IIH, polypeptide 1, 62kDa	Cancer,Endocrine System Disorders,Gastrointestinal Disease,Infectious Disease,Reproductive System Disease	Nucleus	transcription regulator	Adipogenesis pathway,Androgen Signaling,Assembly of RNA Polymerase II Complex,Estrogen Receptor Signaling,Glucocorticoid Receptor Signaling,Nucleotide Excision Repair Pathway,RAR Activation	Human,Mouse,Rat	Activated CD56bright NK cells,Activated CD56dim NK cells,Activated helper T cells,Activated Vd1 Gamma-delta T cells,Activated Vd2 Gamma-delta T cells,Adipose,Amygdala,B lymphocytes not otherwise specified,BDCA-1+ dendritic cells,BDCA-3+ dendritic cells,Bladder,Central memory cytotoxic T cells,Central memory helper T cells,Cerebellum,Cerebral Cortex,Cytotoxic T cells,Dorsal Root Ganglion,Effector …
rno-miR-132-3p	TargetScan Human	High (predicted)	H2AFZ	H2A histone family, member Z	Cardiovascular Disease,Dermatological Diseases and Conditions,Developmental Disorder,Immunological Disease,Organismal Injury and Abnormalities,Skeletal and Muscular Disorders	Nucleus	other		Human,Mouse,Rat	Activated CD56bright NK cells,Activated CD56dim NK cells,Activated helper T cells,Activated Vd1 Gamma-delta T cells,Activated Vd2 Gamma-delta T cells,Adipose,Amygdala,B lymphocytes not otherwise specified,BDCA-1+ dendritic cells,BDCA-3+ dendritic cells,Bladder,CD56bright NK cells,CD56dim NK cells,Central memory cytotoxic T cells,Central memory helper T cells,Cerebellum,Cerebral Cortex,Cytotoxic T…
rno-miR-132-3p	TargetScan Human	High (predicted)	H3F3A/H3F3B	H3 histone, family 3A	Cancer,Connective Tissue Disorders,Dermatological Diseases and Conditions,Developmental Disorder,Gastrointestinal Disease,Hepatic System Disease,Immunological Disease,Infectious Disease,Inflammatory Disease,Inflammatory Response,Neurological Disease,Organismal Injury and Abnormalities,Psychological Disorders,Renal and Urological Disease,Reproductive System Disease,Skeletal and Muscular Disorders	Nucleus	other	ERK/MAPK Signaling,Estrogen Receptor Signaling,p38 MAPK Signaling,Protein Kinase A Signaling,UVB-Induced MAPK Signaling	Human,Mouse,Rat	Activated CD56bright NK cells,Activated CD56dim NK cells,Activated helper T cells,Activated Vd1 Gamma-delta T cells,Activated Vd2 Gamma-delta T cells,Adipose,Amygdala,B lymphocytes not otherwise specified,BDCA-1+ dendritic cells,BDCA-3+ dendritic cells,Bladder,Brain,CD56bright NK cells,CD56dim NK cells,Central memory cytotoxic T cells,Central memory helper T cells,Cerebellum,Cerebral Cortex,Cytot…
rno-miR-132-3p	TargetScan Human	High (predicted)	HAPLN1	hyaluronan and proteoglycan link protein 1	Cancer,Connective Tissue Disorders,Developmental Disorder,Endocrine System Disorders,Gastrointestinal Disease,Hereditary Disorder,Metabolic Disease,Neurological Disease,Organismal Injury and Abnormalities,Reproductive System Disease,Skeletal and Muscular Disorders	Extracellular Space	other		Human,Mouse,Rat	Adipose,Amygdala,Brain,Cerebellum,Cerebral Cortex,Cytotoxic T cells,Dorsal Root Ganglion,Epidermis,Hippocampus,Large Intestine,Mammary Gland,Olfactory Bulb,Other Tissues and Primary Cells,Ovary,Pancreas,Pituitary Gland,Prostate Gland,Retina,Skeletal Muscle,Small Intestine,Stomach,Stromal cells,Substantia Nigra,HOP-62,HOP-92,NCI-H522,Other Cell Line,PC-3,SF-268,SF-539
rno-miR-132-3p	TargetScan Human	Moderate (predicted)	HEG1	heart development protein with EGF-like domains 1	Cancer,Cardiovascular Disease,Developmental Disorder,Endocrine System Disorders,Gastrointestinal Disease,Hepatic System Disease,Organismal Injury and Abnormalities,Respiratory Disease	Plasma Membrane	other		Human,Mouse,Rat	Activated CD56bright NK cells,Activated CD56dim NK cells,Activated Vd1 Gamma-delta T cells,Activated Vd2 Gamma-delta T cells,Adipose,B lymphocytes not otherwise specified,Bladder,CD56bright NK cells,CD56dim NK cells,Cerebellum,Cytotoxic T cells,Dorsal Root Ganglion,Effector memory cytotoxic T cells,Effector memory helper T cells,Effector memory RA+ cytotoxic T cells,Effector T cells,Epidermis,Hea…
rno-miR-132-3p	TargetScan Human	Moderate (predicted)	HEXB	hexosaminidase B (beta polypeptide)	Auditory Disease,Cancer,Connective Tissue Disorders,Developmental Disorder,Gastrointestinal Disease,Hepatic System Disease,Hereditary Disorder,Immunological Disease,Inflammatory Response,Metabolic Disease,Neurological Disease,Nutritional Disease,Ophthalmic Disease,Organismal Injury and Abnormalities,Renal and Urological Disease,Reproductive System Disease,Skeletal and Muscular Disorders	Cytoplasm	enzyme	Chondroitin Sulfate Degradation (Metazoa),Dermatan Sulfate Degradation (Metazoa)	Human,Mouse,Rat	Activated CD56bright NK cells,Activated CD56dim NK cells,Activated helper T cells,Activated Vd1 Gamma-delta T cells,Activated Vd2 Gamma-delta T cells,Adipose,Amygdala,B lymphocytes not otherwise specified,BDCA-1+ dendritic cells,BDCA-3+ dendritic cells,Bladder,CD56dim NK cells,Central memory cytotoxic T cells,Central memory helper T cells,Cerebellum,Cerebral Cortex,Cytotoxic T cells,Dorsal Root G…
rno-miR-132-3p	TargetScan Human	High (predicted)	HIP1R	huntingtin interacting protein 1 related	Cancer,Connective Tissue Disorders,Developmental Disorder,Hereditary Disorder,Infectious Disease,Neurological Disease,Psychological Disorders,Reproductive System Disease,Skeletal and Muscular Disorders	Cytoplasm	other	Clathrin-mediated Endocytosis Signaling	Human,Mouse,Rat	Activated CD56bright NK cells,Activated CD56dim NK cells,Activated Vd1 Gamma-delta T cells,Activated Vd2 Gamma-delta T cells,Adipose,Amygdala,B lymphocytes not otherwise specified,Bladder,Brain,CD56bright NK cells,CD56dim NK cells,Central memory cytotoxic T cells,Cerebellum,Cerebral Cortex,Cytotoxic T cells,Dorsal Root Ganglion,Effector memory cytotoxic T cells,Effector memory RA+ cytotoxic T cel…
rno-miR-132-3p	TargetScan Human	High (predicted)	HN1	hematological and neurological expressed 1	Cancer,Dermatological Diseases and Conditions,Endocrine System Disorders,Immunological Disease,Inflammatory Disease,Inflammatory Response,Neurological Disease,Organismal Injury and Abnormalities,Reproductive System Disease	Nucleus	other		Human,Mouse,Rat	Activated helper T cells,Activated Vd1 Gamma-delta T cells,Activated Vd2 Gamma-delta T cells,Adipose,Amygdala,B lymphocytes not otherwise specified,BDCA-1+ dendritic cells,BDCA-3+ dendritic cells,Bladder,Central memory cytotoxic T cells,Central memory helper T cells,Cerebellum,Cerebral Cortex,Cytotoxic T cells,Dorsal Root Ganglion,Effector memory cytotoxic T cells,Effector memory helper T cells,E…
rno-miR-132-3p	TargetScan Human	High (predicted)	HNRNPU	heterogeneous nuclear ribonucleoprotein U (scaffold attachment factor A)	Cancer,Cardiovascular Disease,Connective Tissue Disorders,Developmental Disorder,Endocrine System Disorders,Gastrointestinal Disease,Hereditary Disorder,Infectious Disease,Metabolic Disease,Neurological Disease,Organismal Injury and Abnormalities,Psychological Disorders,Reproductive System Disease,Skeletal and Muscular Disorders	Nucleus	transporter		Human,Mouse,Rat	Activated helper T cells,Adipose,Amygdala,B lymphocytes not otherwise specified,BDCA-1+ dendritic cells,BDCA-3+ dendritic cells,Bladder,Central memory cytotoxic T cells,Cerebellum,Cerebral Cortex,Cytotoxic T cells,Dorsal Root Ganglion,Effector memory cytotoxic T cells,Effector memory RA+ cytotoxic T cells,Effector T cells,Epidermis,Heart,Hippocampus,Hypothalamus,Immature monocyte-derived dendriti…
rno-miR-132-3p	TargetScan Human	High (predicted)	HSD11B1	hydroxysteroid (11-beta) dehydrogenase 1	Cancer,Cardiovascular Disease,Connective Tissue Disorders,Developmental Disorder,Endocrine System Disorders,Gastrointestinal Disease,Hematological Disease,Hepatic System Disease,Hereditary Disorder,Hypersensitivity Response,Immunological Disease,Inflammatory Disease,Inflammatory Response,Metabolic Disease,Neurological Disease,Nutritional Disease,Organismal Injury and Abnormalities,Psychological D…	Cytoplasm	enzyme		Human,Mouse,Rat	Activated helper T cells,Activated Vd1 Gamma-delta T cells,Adipocytes,Adipose,Adrenal Gland,B lymphocytes not otherwise specified,BDCA-1+ dendritic cells,Bladder,Bone marrow-derived macrophages,Brain,CD56bright NK cells,Central memory cytotoxic T cells,Central memory helper T cells,Cerebellum,Cerebral Cortex,Crypt,Cytotoxic T cells,Dendritic cells not otherwise specified,Effector memory helper T …
rno-miR-132-3p	TargetScan Human	Moderate (predicted)	IL18BP	interleukin 18 binding protein	Cancer,Connective Tissue Disorders,Endocrine System Disorders,Gastrointestinal Disease,Immunological Disease,Inflammatory Disease,Inflammatory Response,Metabolic Disease,Neurological Disease,Organismal Injury and Abnormalities,Skeletal and Muscular Disorders,Tumor Morphology	Extracellular Space	other		Human,Mouse,Rat	Adipose,Amygdala,B lymphocytes not otherwise specified,Bladder,Brain,Cerebellum,Cerebral Cortex,Cytotoxic T cells,Dorsal Root Ganglion,Effector T cells,Epidermis,Heart,Hippocampus,HUVEC cells,Hypothalamus,Immune cells not otherwise specified,Kidney,Large Intestine,Liver,Lung,Mammary Gland,Olfactory Bulb,Other Cells,Other Organ Systems,Ovary,Pancreas,PBMCs,Peripheral blood monocytes,Pituitary Glan…
rno-miR-132-3p	TargetScan Human	Moderate (predicted)	INPP5K	inositol polyphosphate-5-phosphatase K	Cancer,Endocrine System Disorders,Gastrointestinal Disease,Metabolic Disease,Organismal Injury and Abnormalities,Renal and Urological Disease	Cytoplasm	phosphatase	1D-myo-inositol Hexakisphosphate Biosynthesis II (Mammalian),3-phosphoinositide Degradation,B Cell Receptor Signaling,D-myo-inositol (1,3,4)-trisphosphate Biosynthesis,D-myo-inositol (1,4,5)-trisphosphate Degradation,Fc Epsilon RI Signaling,IL-4 Signaling,Insulin Receptor Signaling,Natural Killer Cell Signaling,PDGF Signaling,PI3K/AKT Signaling,PTEN Signaling,Superpathway of D-myo-inositol (1,4,5…	Human,Mouse,Rat	Adipose,Amygdala,B lymphocytes not otherwise specified,Bladder,Brain,Brainstem,Cerebellum,Cerebral Cortex,Cytotoxic T cells,Dorsal Root Ganglion,Effector T cells,Epidermis,Heart,Hippocampus,Hypothalamus,Kidney,Large Intestine,Lung,Mammary Gland,Memory B cells,Murine NKT cells,Naive B cells,Olfactory Bulb,Ovary,Pituitary Gland,Placenta,Prostate Gland,Retina,Salivary Gland,Skeletal Muscle,Small Int…
rno-miR-132-3p	TargetScan Human	High (predicted)	IRF1	interferon regulatory factor 1	Antimicrobial Response,Cancer,Cardiovascular Disease,Connective Tissue Disorders,Dermatological Diseases and Conditions,Endocrine System Disorders,Gastrointestinal Disease,Hematological Disease,Hepatic System Disease,Immunological Disease,Infectious Disease,Inflammatory Disease,Inflammatory Response,Metabolic Disease,Neurological Disease,Ophthalmic Disease,Organismal Injury and Abnormalities,Rena…	Nucleus	transcription regulator	IL-12 Signaling and Production in Macrophages,IL-15 Production,iNOS Signaling,Interferon Signaling,Production of Nitric Oxide and Reactive Oxygen Species in Macrophages,Prolactin Signaling,Retinoic acid Mediated Apoptosis Signaling,Role of PKR in Interferon Induction and Antiviral Response,Type I Diabetes Mellitus Signaling	Human,Mouse,Rat	Activated CD56bright NK cells,Activated CD56dim NK cells,Activated helper T cells,Activated Vd1 Gamma-delta T cells,Activated Vd2 Gamma-delta T cells,Adipose,Amygdala,B lymphocytes not otherwise specified,BDCA-1+ dendritic cells,BDCA-3+ dendritic cells,Bladder,Cardiomyocytes,CD56bright NK cells,CD56dim NK cells,Central memory cytotoxic T cells,Central memory helper T cells,Cerebellum,Cerebral Cor…
rno-miR-132-3p	TargetScan Human	Moderate (predicted)	IRF6	interferon regulatory factor 6	Cancer,Connective Tissue Disorders,Developmental Disorder,Endocrine System Disorders,Gastrointestinal Disease,Hematological Disease,Hereditary Disorder,Immunological Disease,Infectious Disease,Inflammatory Response,Organismal Injury and Abnormalities,Respiratory Disease,Skeletal and Muscular Disorders	Nucleus	transcription regulator		Human,Mouse,Rat	Adipose,B lymphocytes not otherwise specified,Bladder,Cytotoxic T cells,Dorsal Root Ganglion,Effector T cells,Epidermis,Kidney,Large Intestine,Liver,Lung,Mammary Gland,Memory B cells,Naive B cells,Other Tissues and Primary Cells,Ovary,Pancreas,Pituitary Gland,Placenta,Prostate Gland,Retina,Salivary Gland,Skeletal Muscle,Skin,Small Intestine,Spleen,Stomach,Substantia Nigra,Thymus,Uterus,786-0,A498…
rno-miR-132-3p	TargetScan Human	High (predicted)	ISL1	ISL LIM homeobox 1	Cancer,Cardiovascular Disease,Developmental Disorder,Gastrointestinal Disease,Inflammatory Response,Organismal Injury and Abnormalities	Nucleus	transcription regulator	Embryonic Stem Cell Differentiation into Cardiac Lineages,Transcriptional Regulatory Network in Embryonic Stem Cells	Human,Mouse,Rat	Amygdala,B lymphocytes not otherwise specified,Beta islet cells,Brain,Cerebellum,Cerebral Cortex,Cytotoxic T cells,Dorsal Root Ganglion,Heart,Hippocampus,Hypothalamus,Mononuclear leukocytes not otherwise specified,Naive B cells,Nervous System not otherwise specified,Neurons not otherwise specified,Olfactory Bulb,Other Cells,Other Epithelial cells,Other Nervous System,Other Neurons,Other Organ Sys…
rno-miR-132-3p	TargetScan Human	Moderate (predicted)	ITCH	itchy E3 ubiquitin protein ligase	Antimicrobial Response,Cancer,Developmental Disorder,Endocrine System Disorders,Gastrointestinal Disease,Hereditary Disorder,Immunological Disease,Infectious Disease,Inflammatory Response	Nucleus	enzyme	HIPPO signaling	Human,Mouse,Rat	Adipose,Adrenal Gland,Amygdala,B lymphocytes not otherwise specified,BDCA-1+ dendritic cells,BDCA-3+ dendritic cells,Bladder,Brain,Central memory cytotoxic T cells,Cerebellum,Cerebral Cortex,Cytotoxic T cells,Dorsal Root Ganglion,Effector memory cytotoxic T cells,Effector memory RA+ cytotoxic T cells,Effector T cells,Epidermis,Heart,Hippocampus,Hypothalamus,Immature monocyte-derived dendritic cel…
rno-miR-132-3p	TargetScan Human	High (predicted)	KCNJ12	potassium inwardly-rectifying channel, subfamily J, member 12	Cancer,Cardiovascular Disease,Dermatological Diseases and Conditions,Endocrine System Disorders,Gastrointestinal Disease,Hematological Disease,Hepatic System Disease,Immunological Disease,Infectious Disease,Organismal Injury and Abnormalities,Renal and Urological Disease,Reproductive System Disease,Skeletal and Muscular Disorders	Plasma Membrane	ion channel	Dopamine-DARPP32 Feedback in cAMP Signaling	Human,Mouse,Rat	Adipose,Amygdala,B lymphocytes not otherwise specified,Bladder,Brain,Cerebellum,Cerebral Cortex,Cytotoxic T cells,Dorsal Root Ganglion,Effector T cells,Epidermis,Heart,Hippocampus,Hypothalamus,Immature monocyte-derived dendritic cells,Kidney,Large Intestine,Liver,Lung,Mammary Gland,Mature monocyte-derived dendritic cells,Olfactory Bulb,Ovary,Pancreas,Pituitary Gland,Placenta,Prostate Gland,Retina…
rno-miR-132-3p	TargetScan Human	High (predicted)	KDM5A	lysine (K)-specific demethylase 5A	Cancer,Cardiovascular Disease,Developmental Disorder,Endocrine System Disorders,Gastrointestinal Disease,Inflammatory Response,Neurological Disease,Organismal Injury and Abnormalities,Psychological Disorders,Reproductive System Disease,Respiratory Disease	Nucleus	transcription regulator		Human,Mouse,Rat	Activated CD56bright NK cells,Activated CD56dim NK cells,Activated helper T cells,Activated Vd1 Gamma-delta T cells,Activated Vd2 Gamma-delta T cells,Adipose,Amygdala,B lymphocytes not otherwise specified,BDCA-1+ dendritic cells,BDCA-3+ dendritic cells,Bladder,CD56dim NK cells,Central memory cytotoxic T cells,Central memory helper T cells,Cerebellum,Cerebral Cortex,Cytotoxic T cells,Dorsal Root G…
rno-miR-132-3p	TargetScan Human	High (predicted)	KDM5C	lysine (K)-specific demethylase 5C	Cancer,Developmental Disorder,Gastrointestinal Disease,Hepatic System Disease,Hereditary Disorder,Neurological Disease	Nucleus	other		Human,Mouse,Rat	Activated CD56bright NK cells,Activated CD56dim NK cells,Activated helper T cells,Activated Vd1 Gamma-delta T cells,Activated Vd2 Gamma-delta T cells,Adipose,Amygdala,B lymphocytes not otherwise specified,BDCA-1+ dendritic cells,BDCA-3+ dendritic cells,Bladder,Brain,CD56bright NK cells,CD56dim NK cells,Central memory cytotoxic T cells,Central memory helper T cells,Cerebellum,Cerebral Cortex,Cytot…
rno-miR-132-3p	TargetScan Human	High (predicted)	KITLG	KIT ligand	Cancer,Cardiovascular Disease,Dermatological Diseases and Conditions,Developmental Disorder,Endocrine System Disorders,Gastrointestinal Disease,Hematological Disease,Hepatic System Disease,Hereditary Disorder,Hypersensitivity Response,Immunological Disease,Inflammatory Response,Neurological Disease,Ophthalmic Disease,Organismal Injury and Abnormalities,Reproductive System Disease,Tumor Morphology	Extracellular Space	growth factor	Acute Myeloid Leukemia Signaling,Hematopoiesis from Multipotent Stem Cells,Hematopoiesis from Pluripotent Stem Cells,Melanocyte Development and Pigmentation Signaling	Human,Mouse,Rat	Activated CD56bright NK cells,Adipose,Amygdala,B lymphocytes not otherwise specified,Bladder,Bone marrow cells not otherwise specified,Cerebellum,Cerebral Cortex,Cytotoxic T cells,Dermis,Dorsal Root Ganglion,Effector T cells,Epidermis,Epithelial cells not otherwise specified,Fibroblasts,Heart,Hematopoietic progenitor cells,Hepatocytes,Hippocampus,HUVEC cells,Hypothalamus,Intraepithelial T lymphoc…
rno-miR-132-3p	TargetScan Human	Moderate (predicted)	KRAS	Kirsten rat sarcoma viral oncogene homolog	Cancer,Cardiovascular Disease,Connective Tissue Disorders,Dental Disease,Dermatological Diseases and Conditions,Developmental Disorder,Endocrine System Disorders,Gastrointestinal Disease,Hematological Disease,Hepatic System Disease,Hereditary Disorder,Immunological Disease,Infectious Disease,Inflammatory Disease,Inflammatory Response,Neurological Disease,Ophthalmic Disease,Organismal Injury and A…	Cytoplasm	enzyme	14-3-3-mediated Signaling,Actin Cytoskeleton Signaling,Actin Nucleation by ARP-WASP Complex,Acute Myeloid Leukemia Signaling,Acute Phase Response Signaling,Agrin Interactions at Neuromuscular Junction,Aldosterone Signaling in Epithelial Cells,Angiopoietin Signaling,Antiproliferative Role of Somatostatin Receptor 2,Apoptosis Signaling,Axonal Guidance Signaling,B Cell Receptor Signaling,Bladder Can…	Human,Mouse,Rat	Adipose,Adrenal Gland,Amygdala,B lymphocytes not otherwise specified,Bladder,Bone marrow cells not otherwise specified,Brain,Cerebellum,Cerebral Cortex,Crypt,Cytotoxic T cells,Dorsal Root Ganglion,Effector T cells,Epidermis,Epithelial cells not otherwise specified,Heart,Hematopoietic progenitor cells,Hippocampus,Hypothalamus,Kidney,Large Intestine,Liver,Lung,Mammary Gland,Memory B cells,Murine NK…
rno-miR-132-3p	TargetScan Human	Moderate (predicted)	LCK	LCK proto-oncogene, Src family tyrosine kinase	Cancer,Cardiovascular Disease,Connective Tissue Disorders,Developmental Disorder,Endocrine System Disorders,Gastrointestinal Disease,Hematological Disease,Immunological Disease,Infectious Disease,Inflammatory Disease,Inflammatory Response,Metabolic Disease,Ophthalmic Disease,Organismal Injury and Abnormalities,Renal and Urological Disease,Reproductive System Disease,Respiratory Disease	Cytoplasm	kinase	Calcium-induced T Lymphocyte Apoptosis,CD28 Signaling in T Helper Cells,CTLA4 Signaling in Cytotoxic T Lymphocytes,G Protein Signaling Mediated by Tubby,iCOS-iCOSL Signaling in T Helper Cells,IL-15 Signaling,IL-2 Signaling,Natural Killer Cell Signaling,NF-κB Activation by Viruses,NF-κB Signaling,Phospholipase C Signaling,PKCθ Signaling in T Lymphocytes,Primary Immunodeficiency Signaling,Reelin Si…	Human,Mouse,Rat	Adipose,Amygdala,B lymphocytes not otherwise specified,Bladder,Cerebellum,Cerebral Cortex,Cytotoxic T cells,Dorsal Root Ganglion,Effector T cells,Epidermis,Fibroblasts,Heart,Hematopoietic progenitor cells,Hippocampus,Hypothalamus,Intraepithelial T lymphocytes,Kidney,Large Intestine,Liver,Lung,Lymph node,Lymphocytes not otherwise specified,Mammary Gland,Memory B cells,Naive B cells,Neurons not oth…
rno-miR-132-3p	TargetScan Human	Moderate (predicted)	LIMS1	LIM and senescent cell antigen-like domains 1	Cancer,Cardiovascular Disease,Developmental Disorder,Endocrine System Disorders,Metabolic Disease,Neurological Disease,Organismal Injury and Abnormalities,Psychological Disorders,Reproductive System Disease	Plasma Membrane	other	ILK Signaling,Integrin Signaling,PI3K/AKT Signaling	Human,Mouse,Rat	Activated CD56bright NK cells,Activated CD56dim NK cells,Activated helper T cells,Activated Vd1 Gamma-delta T cells,Activated Vd2 Gamma-delta T cells,Adipose,Amygdala,B lymphocytes not otherwise specified,BDCA-1+ dendritic cells,BDCA-3+ dendritic cells,Bladder,CD56bright NK cells,CD56dim NK cells,Central memory cytotoxic T cells,Central memory helper T cells,Cerebellum,Cerebral Cortex,Cytotoxic T…
rno-miR-132-3p	TargetScan Human	High (predicted)	LIN28B	lin-28 homolog B (C. elegans)	Cancer,Developmental Disorder,Gastrointestinal Disease,Neurological Disease,Organismal Injury and Abnormalities,Respiratory Disease,Tumor Morphology	Cytoplasm	other		Human,Mouse,Rat	Adipose,Amygdala,Bladder,Cerebellum,Cerebral Cortex,Cytotoxic T cells,Dorsal Root Ganglion,Effector T cells,Heart,Hippocampus,Hypothalamus,Kidney,Large Intestine,Lung,Mammary Gland,Olfactory Bulb,Ovary,Pancreas,Pituitary Gland,Placenta,Prostate Gland,Retina,Small Intestine,Spleen,Stomach,Substantia Nigra,Testis,Thymus,Uterus,CCRF-CEM,K-562,LOX IMVI,Other Neuroblastoma Cell Lines,UACC-62
rno-miR-132-3p	TargetScan Human	High (predicted)	MAF	v-maf avian musculoaponeurotic fibrosarcoma oncogene homolog	Cancer,Connective Tissue Disorders,Developmental Disorder,Hematological Disease,Hereditary Disorder,Hypersensitivity Response,Inflammatory Response,Nutritional Disease,Ophthalmic Disease,Organismal Injury and Abnormalities,Reproductive System Disease	Nucleus	transcription regulator	IL-12 Signaling and Production in Macrophages,NRF2-mediated Oxidative Stress Response,Xenobiotic Metabolism Signaling	Human,Mouse,Rat	Activated Vd1 Gamma-delta T cells,Activated Vd2 Gamma-delta T cells,Adipose,Amygdala,B lymphocytes not otherwise specified,Bladder,Central memory cytotoxic T cells,Central memory helper T cells,Cerebellum,Cerebral Cortex,Cytotoxic T cells,Dorsal Root Ganglion,Effector memory cytotoxic T cells,Effector memory helper T cells,Effector memory RA+ cytotoxic T cells,Effector T cells,Epidermis,Heart,Hip…
rno-miR-132-3p	TargetScan Human	Moderate (predicted)	MAOA	monoamine oxidase A	Cancer,Cardiovascular Disease,Connective Tissue Disorders,Developmental Disorder,Gastrointestinal Disease,Hepatic System Disease,Hereditary Disorder,Inflammatory Disease,Metabolic Disease,Neurological Disease,Nutritional Disease,Ophthalmic Disease,Organismal Injury and Abnormalities,Psychological Disorders,Reproductive System Disease,Skeletal and Muscular Disorders	Cytoplasm	enzyme	Dopamine Degradation,Dopamine Receptor Signaling,LPS/IL-1 Mediated Inhibition of RXR Function,Melatonin Degradation II,Mitochondrial Dysfunction,Noradrenaline and Adrenaline Degradation,Phenylalanine Degradation IV (Mammalian, via Side Chain),Putrescine Degradation III,Serotonin Degradation,Serotonin Receptor Signaling,Superpathway of Melatonin Degradation,Tryptophan Degradation X (Mammalian, via…	Human,Mouse,Rat	Adipose,Adrenal Gland,Amygdala,Bladder,Bone marrow-derived dendritic cells,Brain,Brainstem,Cerebellum,Cerebral Cortex,Cytotoxic T cells,Dorsal Root Ganglion,Effector T cells,Epidermis,Granulosa cells,Heart,Hippocampus,Hypothalamus,Immature monocyte-derived dendritic cells,Kidney,Large Intestine,Liver,Lung,Mammary Gland,Mature monocyte-derived dendritic cells,Medulla Oblongata,Monocyte-derived mac…
rno-miR-132-3p	TargetScan Human	High (predicted)	MAPK1	mitogen-activated protein kinase 1	Cancer,Cardiovascular Disease,Developmental Disorder,Hypersensitivity Response,Infectious Disease,Inflammatory Response,Neurological Disease,Organismal Injury and Abnormalities,Renal and Urological Disease,Skeletal and Muscular Disorders,Tumor Morphology	Cytoplasm	kinase	14-3-3-mediated Signaling,4-1BB Signaling in T Lymphocytes,Actin Cytoskeleton Signaling,Acute Myeloid Leukemia Signaling,Acute Phase Response Signaling,Agrin Interactions at Neuromuscular Junction,Aldosterone Signaling in Epithelial Cells,AMPK Signaling,Amyloid Processing,Androgen Signaling,Antioxidant Action of Vitamin C,Antiproliferative Role of Somatostatin Receptor 2,Antiproliferative Role of…	Human,Mouse,Rat	Activated CD56bright NK cells,Activated CD56dim NK cells,Activated helper T cells,Activated Vd1 Gamma-delta T cells,Activated Vd2 Gamma-delta T cells,Adipose,Amygdala,Astrocytes,B lymphocytes not otherwise specified,BDCA-1+ dendritic cells,BDCA-3+ dendritic cells,Bladder,Brain,Cartilage Tissue,CD56bright NK cells,CD56dim NK cells,Central memory cytotoxic T cells,Central memory helper T cells,Cere…
rno-miR-132-3p	TargetScan Human	High (predicted)	MAPK3	mitogen-activated protein kinase 3	Cancer,Cardiovascular Disease,Connective Tissue Disorders,Developmental Disorder,Gastrointestinal Disease,Hepatic System Disease,Hypersensitivity Response,Immunological Disease,Inflammatory Disease,Inflammatory Response,Metabolic Disease,Neurological Disease,Nutritional Disease,Organismal Injury and Abnormalities,Psychological Disorders,Reproductive System Disease,Respiratory Disease,Skeletal and…	Cytoplasm	kinase	14-3-3-mediated Signaling,4-1BB Signaling in T Lymphocytes,Actin Cytoskeleton Signaling,Acute Myeloid Leukemia Signaling,Acute Phase Response Signaling,Agrin Interactions at Neuromuscular Junction,Aldosterone Signaling in Epithelial Cells,Amyloid Processing,Androgen Signaling,Antioxidant Action of Vitamin C,Antiproliferative Role of Somatostatin Receptor 2,Apoptosis Signaling,Aryl Hydrocarbon Rec…	Human,Mouse,Rat	Adipose,Amygdala,Astrocytes,B lymphocytes not otherwise specified,Bladder,Brain,Cartilage Tissue,Cerebellum,Cerebral Cortex,Chondrocytes,Cytotoxic T cells,Dorsal Root Ganglion,Effector T cells,Epidermis,Granule Cell Layer,Heart,Hippocampus,Hypothalamus,Kidney,Large Intestine,Liver,Lung,Mammary Gland,Memory B cells,Murine NKT cells,Naive B cells,Neurons not otherwise specified,Olfactory Bulb,Other…
rno-miR-132-3p	TargetScan Human	High (predicted)	MAPT	microtubule-associated protein tau	Cancer,Cardiovascular Disease,Dermatological Diseases and Conditions,Developmental Disorder,Gastrointestinal Disease,Hepatic System Disease,Hereditary Disorder,Infectious Disease,Inflammatory Disease,Inflammatory Response,Metabolic Disease,Neurological Disease,Nutritional Disease,Ophthalmic Disease,Organismal Injury and Abnormalities,Psychological Disorders,Skeletal and Muscular Disorders	Plasma Membrane	other	14-3-3-mediated Signaling,Amyloid Processing,CDK5 Signaling,Neuroprotective Role of THOP1 in Alzheimer's Disease,p38 MAPK Signaling,p70S6K Signaling,Reelin Signaling in Neurons	Human,Mouse,Rat	Amygdala,Brain,Cerebellum,Cerebral Cortex,Cortical neurons,Dorsal Root Ganglion,Heart,Hippocampus,Hypothalamus,Kidney,Lung,Neurons not otherwise specified,Olfactory Bulb,Other Cells,Other Nervous System,Other Neurons,Pituitary Gland,Pyramidal neurons,Retina,Skeletal Muscle,Striatum,Substantia Nigra,Thalamus,Trigeminal Ganglion,HCT-116,NCI-H522,Other Cell Line,Other Neuroblastoma Cell Lines,OVCAR-…
rno-miR-132-3p	TargetScan Human,miRecords	Experimentally Observed,High (predicted)	MECP2	methyl CpG binding protein 2	Auditory Disease,Connective Tissue Disorders,Dental Disease,Dermatological Diseases and Conditions,Developmental Disorder,Endocrine System Disorders,Gastrointestinal Disease,Hereditary Disorder,Neurological Disease,Nutritional Disease,Organismal Injury and Abnormalities,Psychological Disorders,Reproductive System Disease,Respiratory Disease,Skeletal and Muscular Disorders	Nucleus	transcription regulator	DNA Methylation and Transcriptional Repression Signaling	Human,Mouse,Rat	Adipose,Amygdala,B lymphocytes not otherwise specified,Bladder,Brain,Brainstem,Caudate Nucleus,Cerebellum,Cerebral Cortex,Cytotoxic T cells,Dorsal Root Ganglion,Effector T cells,Embryonic stem cells,Epidermis,Fibroblasts,Heart,Hematopoietic progenitor cells,Hippocampus,Hypothalamus,Kidney,Large Intestine,Liver,Lung,Mammary Gland,Medulla Oblongata,Memory B cells,Murine NKT cells,Naive B cells,Neur…
rno-miR-132-3p	TargetScan Human	High (predicted)	MEX3C	mex-3 RNA binding family member C	Cancer,Endocrine System Disorders,Gastrointestinal Disease,Hepatic System Disease	Cytoplasm	other		Human,Mouse,Rat	Adipose,Amygdala,B lymphocytes not otherwise specified,BDCA-1+ dendritic cells,BDCA-3+ dendritic cells,Bladder,Central memory cytotoxic T cells,Cerebellum,Cerebral Cortex,Cytotoxic T cells,Dorsal Root Ganglion,Effector memory cytotoxic T cells,Effector memory RA+ cytotoxic T cells,Effector T cells,Epidermis,Heart,Hippocampus,Hypothalamus,Kidney,Large Intestine,Liver,Lung,Mammary Gland,Mature mono…
rno-miR-132-3p	TargetScan Human	High (predicted)	MIB1	mindbomb E3 ubiquitin protein ligase 1	Cancer,Cardiovascular Disease,Connective Tissue Disorders,Developmental Disorder,Gastrointestinal Disease,Hematological Disease,Hereditary Disorder,Immunological Disease,Inflammatory Disease,Inflammatory Response,Neurological Disease,Organismal Injury and Abnormalities,Reproductive System Disease	Cytoplasm	other		Human,Mouse,Rat	Activated helper T cells,Adipose,Amygdala,B lymphocytes not otherwise specified,BDCA-1+ dendritic cells,BDCA-3+ dendritic cells,Bladder,Brain,Cells not otherwise specified,Central memory cytotoxic T cells,Cerebellum,Cerebral Cortex,Cytotoxic T cells,Dorsal Root Ganglion,Effector memory cytotoxic T cells,Effector memory RA+ cytotoxic T cells,Effector T cells,Embryonic stem cells,Epidermis,Heart,Hi…
rno-miR-132-3p	TargetScan Human	Moderate (predicted)	MIPOL1	mirror-image polydactyly 1	Cancer,Connective Tissue Disorders,Developmental Disorder,Endocrine System Disorders,Gastrointestinal Disease,Hepatic System Disease,Hereditary Disorder,Immunological Disease,Metabolic Disease,Respiratory Disease,Skeletal and Muscular Disorders	Nucleus	other		Human,Mouse,Rat	Cytotoxic T cells,Heart,Liver,Pituitary Gland,786-0,A549-ATCC,EKVX,HOP-92,HS 578T,J774,K-562,NCI-ADR-RES,NCI-H332M,NCI-H522,OVCAR-5,PC-3,SK-MEL-2,SNB-75,TK-10
rno-miR-132-3p	TargetScan Human	High (predicted)	MMGT1	membrane magnesium transporter 1	Cancer,Endocrine System Disorders,Gastrointestinal Disease	Cytoplasm	transporter		Human,Mouse,Rat	Activated helper T cells,Adipose,Amygdala,B lymphocytes not otherwise specified,BDCA-1+ dendritic cells,BDCA-3+ dendritic cells,Bladder,Central memory cytotoxic T cells,Cerebellum,Cerebral Cortex,Cytotoxic T cells,Dorsal Root Ganglion,Effector memory cytotoxic T cells,Effector memory RA+ cytotoxic T cells,Effector T cells,Epidermis,Heart,Hippocampus,Hypothalamus,Immature monocyte-derived dendriti…
rno-miR-132-3p	TargetScan Human	Moderate (predicted)	NAB1	NGFI-A binding protein 1 (EGR1 binding protein 1)	Cancer,Cardiovascular Disease,Dermatological Diseases and Conditions,Developmental Disorder,Gastrointestinal Disease,Hepatic System Disease,Neurological Disease,Organismal Injury and Abnormalities,Respiratory Disease	Nucleus	transcription regulator		Human,Mouse,Rat	Activated CD56bright NK cells,Activated CD56dim NK cells,Activated helper T cells,Activated Vd1 Gamma-delta T cells,Activated Vd2 Gamma-delta T cells,Adipose,Adrenal Gland,Amygdala,B lymphocytes not otherwise specified,BDCA-1+ dendritic cells,BDCA-3+ dendritic cells,Bladder,Brain,CD56bright NK cells,CD56dim NK cells,Central memory cytotoxic T cells,Central memory helper T cells,Cerebellum,Cerebra…
rno-miR-132-3p	TargetScan Human	High (predicted)	NCOR1	nuclear receptor corepressor 1	Antimicrobial Response,Cancer,Dermatological Diseases and Conditions,Endocrine System Disorders,Gastrointestinal Disease,Hematological Disease,Hepatic System Disease,Nutritional Disease,Organismal Injury and Abnormalities,Renal and Urological Disease,Reproductive System Disease	Nucleus	transcription regulator	Estrogen Receptor Signaling,Glucocorticoid Receptor Signaling,Huntington's Disease Signaling,LXR/RXR Activation,PPAR Signaling,PPARα/RXRα Activation,RAR Activation,TR/RXR Activation,VDR/RXR Activation	Human,Mouse,Rat	Activated CD56bright NK cells,Activated CD56dim NK cells,Activated helper T cells,Activated Vd1 Gamma-delta T cells,Activated Vd2 Gamma-delta T cells,Adipose,Adrenal Gland,Amygdala,B lymphocytes not otherwise specified,BDCA-1+ dendritic cells,BDCA-3+ dendritic cells,Bladder,Brain,CD56bright NK cells,CD56dim NK cells,Central memory cytotoxic T cells,Central memory helper T cells,Cerebellum,Cerebra…
rno-miR-132-3p	TargetScan Human	Moderate (predicted)	NEUROD4	neuronal differentiation 4	Cancer,Developmental Disorder,Neurological Disease	Nucleus	other		Human,Mouse,Rat	Activated Vd2 Gamma-delta T cells,Pituitary Gland,Retina,Vd2 Gamma-delta T cells
rno-miR-132-3p	TargetScan Human	High (predicted)	NFAT5	nuclear factor of activated T-cells 5, tonicity-responsive	Cancer,Developmental Disorder,Gastrointestinal Disease,Hematological Disease,Hepatic System Disease,Immunological Disease,Inflammatory Disease,Inflammatory Response,Ophthalmic Disease,Organismal Injury and Abnormalities,Renal and Urological Disease	Nucleus	transcription regulator	April Mediated Signaling,Axonal Guidance Signaling,B Cell Activating Factor Signaling,B Cell Receptor Signaling,Calcium Signaling,CD28 Signaling in T Helper Cells,fMLP Signaling in Neutrophils,Glucocorticoid Receptor Signaling,iCOS-iCOSL Signaling in T Helper Cells,IL-4 Signaling,Netrin Signaling,Phospholipase C Signaling,PI3K Signaling in B Lymphocytes,PKCθ Signaling in T Lymphocytes,Protein Kin…	Human,Mouse,Rat	Activated helper T cells,Adipose,Adrenal Gland,Amygdala,B lymphocytes not otherwise specified,BDCA-1+ dendritic cells,BDCA-3+ dendritic cells,Bladder,Brain,Brainstem,Cardiomyocytes,Cartilage Tissue,Caudate Nucleus,Central memory cytotoxic T cells,Cerebellum,Cerebral Cortex,Cytotoxic T cells,Dorsal Root Ganglion,Effector memory cytotoxic T cells,Effector memory RA+ cytotoxic T cells,Effector T cel…
rno-miR-132-3p	TargetScan Human	High (predicted)	NFE2L2	nuclear factor, erythroid 2-like 2	Cancer,Cardiovascular Disease,Connective Tissue Disorders,Dermatological Diseases and Conditions,Developmental Disorder,Gastrointestinal Disease,Hematological Disease,Hepatic System Disease,Hypersensitivity Response,Immunological Disease,Infectious Disease,Inflammatory Disease,Inflammatory Response,Metabolic Disease,Neurological Disease,Nutritional Disease,Organismal Injury and Abnormalities,Psyc…	Nucleus	transcription regulator	Aryl Hydrocarbon Receptor Signaling,NRF2-mediated Oxidative Stress Response,Unfolded protein response,Xenobiotic Metabolism Signaling	Human,Mouse,Rat	Activated CD56bright NK cells,Activated CD56dim NK cells,Activated helper T cells,Activated Vd1 Gamma-delta T cells,Activated Vd2 Gamma-delta T cells,Adipose,Amygdala,Astrocytes,B lymphocytes not otherwise specified,BDCA-1+ dendritic cells,BDCA-3+ dendritic cells,Bladder,Brain,CD56bright NK cells,CD56dim NK cells,Central memory cytotoxic T cells,Central memory helper T cells,Cerebellum,Cerebral C…
rno-miR-132-3p	TargetScan Human	High (predicted)	NFIB	nuclear factor I/B	Cancer,Developmental Disorder,Endocrine System Disorders,Gastrointestinal Disease,Hepatic System Disease,Neurological Disease,Organismal Injury and Abnormalities,Reproductive System Disease	Nucleus	transcription regulator	Aryl Hydrocarbon Receptor Signaling	Human,Mouse,Rat	Adipose,Amygdala,Bladder,Brain,Cerebellum,Cerebral Cortex,Dorsal Root Ganglion,Epidermis,Fibroblasts,Granule cells,Heart,Hippocampus,Hypothalamus,Kidney,Large Intestine,Liver,Lung,Mammary Gland,Neurons not otherwise specified,Olfactory Bulb,Other Endothelial cells,Other Tissues and Primary Cells,Ovary,Peripheral blood leukocytes not otherwise specified,Pituitary Gland,Prostate Gland,Retina,Saliva…
rno-miR-132-3p	TargetScan Human	Moderate (predicted)	NR2C2	nuclear receptor subfamily 2, group C, member 2	Cancer,Endocrine System Disorders,Gastrointestinal Disease,Hepatic System Disease,Immunological Disease,Inflammatory Disease,Inflammatory Response,Metabolic Disease,Neurological Disease,Nutritional Disease,Organismal Injury and Abnormalities,Reproductive System Disease	Nucleus	ligand-dependent nuclear receptor	PPARα/RXRα Activation	Human,Mouse,Rat	Adrenal Gland,B lymphocytes not otherwise specified,Bone marrow cells not otherwise specified,Brain,Cerebellum,Cerebral Cortex,Cytotoxic T cells,Effector T cells,Granule cells,Heart,Hepatocytes,Hippocampus,Hypothalamus,Kidney,Large Intestine,Liver,Lung,Neurons not otherwise specified,Olfactory Bulb,Other Cells,Other Organ Systems,Other Tissues and Primary Cells,Ovary,Pituitary Gland,Placenta,Pros…
rno-miR-132-3p	TargetScan Human	High (predicted)	NR4A2	nuclear receptor subfamily 4, group A, member 2	Cancer,Cardiovascular Disease,Connective Tissue Disorders,Dermatological Diseases and Conditions,Endocrine System Disorders,Gastrointestinal Disease,Hereditary Disorder,Immunological Disease,Inflammatory Disease,Inflammatory Response,Metabolic Disease,Neurological Disease,Nutritional Disease,Ophthalmic Disease,Organismal Injury and Abnormalities,Psychological Disorders,Reproductive System Disease…	Nucleus	ligand-dependent nuclear receptor		Human,Mouse,Rat	Adipose,Adrenal Gland,Amygdala,B lymphocytes not otherwise specified,Bladder,Brain,Calvaria,Cells not otherwise specified,Cerebellum,Cerebral Cortex,Cortical neurons,Cytotoxic T cells,Dermis,Dorsal Root Ganglion,Effector T cells,Endothelial cells not otherwise specified,Epidermis,Heart,Hippocampus,HUVEC cells,Hypothalamus,Kidney,Large Intestine,Liver,Lung,Lymphocytes not otherwise specified,Mamma…
rno-miR-132-3p	TargetScan Human	High (predicted)	NRCAM	neuronal cell adhesion molecule	Cancer,Endocrine System Disorders,Gastrointestinal Disease,Neurological Disease,Ophthalmic Disease,Organismal Injury and Abnormalities,Psychological Disorders,Reproductive System Disease	Plasma Membrane	other		Human,Mouse,Rat	Adipose,Amygdala,B lymphocytes not otherwise specified,Bladder,Brain,Cerebellum,Cerebral Cortex,Cytotoxic T cells,Dorsal Root Ganglion,Effector T cells,Epidermis,Heart,Hippocampus,Hypothalamus,Kidney,Large Intestine,Liver,Lung,Mammary Gland,Olfactory Bulb,Other Cells,Other Nervous System,Other Neurons,Ovary,Pancreas,Pituitary Gland,Placenta,Prostate Gland,Retina,Salivary Gland,Skeletal Muscle,Sma…
rno-miR-132-3p	TargetScan Human	Moderate (predicted)	ORC4	origin recognition complex, subunit 4	Cancer,Connective Tissue Disorders,Dental Disease,Developmental Disorder,Gastrointestinal Disease,Hepatic System Disease,Hereditary Disorder,Neurological Disease,Organismal Injury and Abnormalities,Skeletal and Muscular Disorders	Nucleus	other	Cell Cycle Control of Chromosomal Replication	Human,Mouse,Rat	Activated Vd1 Gamma-delta T cells,Adipose,Amygdala,B lymphocytes not otherwise specified,Bladder,Brain,Central memory helper T cells,Cerebellum,Cytotoxic T cells,Dorsal Root Ganglion,Effector T cells,Epidermis,Heart,Hippocampus,Hypothalamus,Immature monocyte-derived dendritic cells,Kidney,Large Intestine,Lung,Monocyte-derived macrophage,Murine NKT cells,Natural T-regulatory cells,Neutrophils,Olfa…
rno-miR-132-3p	TargetScan Human	High (predicted)	PAM	peptidylglycine alpha-amidating monooxygenase	Cancer,Endocrine System Disorders,Gastrointestinal Disease,Hepatic System Disease,Organismal Injury and Abnormalities	Plasma Membrane	enzyme		Human,Mouse,Rat	Adrenal Gland,Brain,Cardiomyocytes,Cells not otherwise specified,Cerebellum,Cerebral Cortex,Dorsal Root Ganglion,Epidermis,Epithelial cells not otherwise specified,Heart,Hippocampus,Hypothalamus,Kidney,Large Intestine,Lung,Memory B cells,Naive B cells,Neurons not otherwise specified,Olfactory Bulb,Other Cells,Other Nervous System,Other Organ Systems,Other Tissues and Primary Cells,Pituitary Gland…
rno-miR-132-3p	TargetScan Human	High (predicted)	PDE10A	phosphodiesterase 10A	Cancer,Cardiovascular Disease,Developmental Disorder,Gastrointestinal Disease,Hepatic System Disease,Hereditary Disorder,Metabolic Disease,Neurological Disease,Nutritional Disease,Organismal Injury and Abnormalities,Psychological Disorders,Skeletal and Muscular Disorders	Cytoplasm	enzyme	cAMP-mediated signaling,Cardiac β-adrenergic Signaling,G-Protein Coupled Receptor Signaling,Gustation Pathway,Protein Kinase A Signaling,Relaxin Signaling,tRNA Splicing	Human,Mouse,Rat	Amygdala,Bladder,Brain,Cerebellum,Cerebral Cortex,Dorsal Root Ganglion,Effector T cells,Heart,Hippocampus,Hypothalamus,Kidney,Large Intestine,Liver,Neurons not otherwise specified,Nucleus Accumbens,Olfactory Bulb,Ovary,Pancreas,Pituitary Gland,Placenta,Prostate Gland,Retina,Salivary Gland,Spleen,Stomach,Striatum,Substantia Nigra,Testis,Thymus,Uterus,J774,NCI-H226,SK-MEL-28
rno-miR-132-3p	TargetScan Human	High (predicted)	PEA15	phosphoprotein enriched in astrocytes 15	Cancer,Dermatological Diseases and Conditions,Endocrine System Disorders,Organismal Injury and Abnormalities,Reproductive System Disease,Tumor Morphology	Cytoplasm	transporter		Human,Mouse,Rat	Adipose,Amygdala,Bladder,Brain,Cerebellum,Cerebral Cortex,Dorsal Root Ganglion,Epidermis,Heart,Hippocampus,Hypothalamus,Kidney,Liver,Lung,Memory B cells,Naive B cells,Olfactory Bulb,Ovary,Pancreas,Pituitary Gland,Placenta,Prostate Gland,Retina,Skeletal Muscle,Substantia Nigra,Uterus,786-0,A498,A549-ATCC,ACHN,BT-549,CAKI-1,CCRF-CEM,COLO205,DU-145,EKVX,H460,HCC-2998,HCT-116,HL-60,HOP-62,HOP-92,HS 5…
rno-miR-132-3p	TargetScan Human	Moderate (predicted)	PEX2	peroxisomal biogenesis factor 2	Cancer,Connective Tissue Disorders,Developmental Disorder,Gastrointestinal Disease,Hepatic System Disease,Hereditary Disorder,Metabolic Disease,Neurological Disease,Organismal Injury and Abnormalities,Reproductive System Disease,Skeletal and Muscular Disorders	Cytoplasm	other		Human,Mouse,Rat	Activated helper T cells,Adipose,Amygdala,B lymphocytes not otherwise specified,BDCA-1+ dendritic cells,BDCA-3+ dendritic cells,Bladder,Central memory cytotoxic T cells,Cerebellum,Cerebral Cortex,Cytotoxic T cells,Dorsal Root Ganglion,Effector memory cytotoxic T cells,Effector memory RA+ cytotoxic T cells,Effector T cells,Epidermis,Heart,Hippocampus,Hypothalamus,Immature monocyte-derived dendriti…
rno-miR-132-3p	TargetScan Human	High (predicted)	PIK3R3	phosphoinositide-3-kinase, regulatory subunit 3 (gamma)	Cancer,Endocrine System Disorders,Gastrointestinal Disease,Organismal Injury and Abnormalities,Reproductive System Disease	Cytoplasm	kinase	14-3-3-mediated Signaling,3-phosphoinositide Biosynthesis,Actin Cytoskeleton Signaling,Acute Myeloid Leukemia Signaling,Acute Phase Response Signaling,Aldosterone Signaling in Epithelial Cells,AMPK Signaling,Amyotrophic Lateral Sclerosis Signaling,Angiopoietin Signaling,Antiproliferative Role of Somatostatin Receptor 2,Axonal Guidance Signaling,B Cell Receptor Signaling,Breast Cancer Regulation b…	Human,Mouse,Rat	Adipose,Amygdala,Brain,Cerebellum,Cerebral Cortex,Dorsal Root Ganglion,Fibroblasts,Heart,Hippocampus,Hypothalamus,Kidney,Large Intestine,Lung,Mature monocyte-derived dendritic cells,Memory B cells,Monocyte-derived macrophage,Naive B cells,Natural T-regulatory cells,Olfactory Bulb,Other Cells,Ovary,Pituitary Gland,Placenta,Prostate Gland,Retina,Skeletal Muscle,Substantia Nigra,Testis,Uterus,Vd1 Ga…
rno-miR-132-3p	TargetScan Human	Moderate (predicted)	PNKD	paroxysmal nonkinesigenic dyskinesia	Cancer,Cardiovascular Disease,Developmental Disorder,Gastrointestinal Disease,Hematological Disease,Hereditary Disorder,Immunological Disease,Inflammatory Response,Neurological Disease,Organismal Injury and Abnormalities,Psychological Disorders	Nucleus	other		Human,Mouse,Rat	Activated helper T cells,Adipose,Amygdala,B lymphocytes not otherwise specified,BDCA-1+ dendritic cells,BDCA-3+ dendritic cells,Bladder,Central memory cytotoxic T cells,Cerebellum,Cerebral Cortex,Cytotoxic T cells,Dorsal Root Ganglion,Effector memory cytotoxic T cells,Effector memory RA+ cytotoxic T cells,Effector T cells,Epidermis,Heart,Hippocampus,Hypothalamus,Immature monocyte-derived dendriti…
rno-miR-132-3p	TargetScan Human	High (predicted)	POM121/POM121C	POM121 transmembrane nucleoporin	Cancer,Endocrine System Disorders,Organismal Injury and Abnormalities,Renal and Urological Disease,Reproductive System Disease	Nucleus	other		Human,Mouse,Rat	Activated helper T cells,Activated Vd1 Gamma-delta T cells,Activated Vd2 Gamma-delta T cells,Adipose,Amygdala,B lymphocytes not otherwise specified,BDCA-1+ dendritic cells,BDCA-3+ dendritic cells,CD56bright NK cells,CD56dim NK cells,Central memory helper T cells,Cerebellum,Cerebral Cortex,Cytotoxic T cells,Dorsal Root Ganglion,Effector memory helper T cells,Effector memory RA+ cytotoxic T cells,E…
rno-miR-132-3p	TargetScan Human	High (predicted)	PPM1E	protein phosphatase, Mg2+/Mn2+ dependent, 1E	Cancer,Endocrine System Disorders,Gastrointestinal Disease,Organismal Injury and Abnormalities,Renal and Urological Disease,Reproductive System Disease	Nucleus	phosphatase		Human,Mouse,Rat	Amygdala,B lymphocytes not otherwise specified,Brain,Cerebellum,Cerebral Cortex,Cytotoxic T cells,Dorsal Root Ganglion,Effector T cells,Epidermis,Heart,Hippocampus,Hypothalamus,Immature monocyte-derived dendritic cells,Large Intestine,Mammary Gland,Monocyte-derived macrophage,Olfactory Bulb,Ovary,Pituitary Gland,Placenta,Prostate Gland,Retina,Skeletal Muscle,Stomach,Substantia Nigra,Testis,Thymus…
rno-miR-132-3p	TargetScan Human	Moderate (predicted)	PPM1K	protein phosphatase, Mg2+/Mn2+ dependent, 1K	Developmental Disorder,Hereditary Disorder,Infectious Disease,Metabolic Disease,Organismal Injury and Abnormalities,Renal and Urological Disease	Cytoplasm	phosphatase	3-phosphoinositide Biosynthesis,3-phosphoinositide Degradation,D-myo-inositol (1,4,5,6)-Tetrakisphosphate Biosynthesis,D-myo-inositol (3,4,5,6)-tetrakisphosphate Biosynthesis,D-myo-inositol-5-phosphate Metabolism,Superpathway of Inositol Phosphate Compounds	Human,Mouse,Rat	Activated helper T cells,Adipose,Amygdala,B lymphocytes not otherwise specified,BDCA-1+ dendritic cells,BDCA-3+ dendritic cells,Brain,Central memory cytotoxic T cells,Cerebellum,Cerebral Cortex,Cytotoxic T cells,Dorsal Root Ganglion,Effector memory cytotoxic T cells,Effector memory RA+ cytotoxic T cells,Effector T cells,Heart,Hippocampus,Hypothalamus,Immature monocyte-derived dendritic cells,Live…
rno-miR-132-3p	TargetScan Human	High (predicted)	PPP3CA	protein phosphatase 3, catalytic subunit, alpha isozyme	Cancer,Cardiovascular Disease,Connective Tissue Disorders,Dermatological Diseases and Conditions,Developmental Disorder,Endocrine System Disorders,Gastrointestinal Disease,Hematological Disease,Hepatic System Disease,Hereditary Disorder,Immunological Disease,Infectious Disease,Inflammatory Disease,Inflammatory Response,Metabolic Disease,Neurological Disease,Ophthalmic Disease,Organismal Injury an…	Cytoplasm	phosphatase	3-phosphoinositide Biosynthesis,3-phosphoinositide Degradation,Amyotrophic Lateral Sclerosis Signaling,Axonal Guidance Signaling,B Cell Receptor Signaling,Calcium Signaling,Calcium-induced T Lymphocyte Apoptosis,cAMP-mediated signaling,Cardiac Hypertrophy Signaling,CD28 Signaling in T Helper Cells,Clathrin-mediated Endocytosis Signaling,D-myo-inositol (1,4,5,6)-Tetrakisphosphate Biosynthesis,D-my…	Human,Mouse,Rat	Adipose,Amygdala,B lymphocytes not otherwise specified,Bladder,Bone marrow cells not otherwise specified,Brain,Cerebellum,Cerebral Cortex,Cytotoxic T cells,Dorsal Root Ganglion,Effector T cells,Epidermis,Granule cells,Heart,Hippocampus,Hypothalamus,Kidney,Large Intestine,Liver,Lung,Mammary Gland,Murine NKT cells,Olfactory Bulb,Oocytes,Osteoblasts,Other Tissues and Primary Cells,Ovary,Pancreas,Pit…
rno-miR-132-3p	TargetScan Human	Moderate (predicted)	PRKAG2	protein kinase, AMP-activated, gamma 2 non-catalytic subunit	Cancer,Cardiovascular Disease,Developmental Disorder,Gastrointestinal Disease,Hepatic System Disease,Hereditary Disorder,Infectious Disease,Metabolic Disease,Neurological Disease,Organismal Injury and Abnormalities,Psychological Disorders,Reproductive System Disease,Skeletal and Muscular Disorders	Cytoplasm	kinase	AMPK Signaling,Amyloid Processing,Androgen Signaling,Axonal Guidance Signaling,BMP signaling pathway,Breast Cancer Regulation by Stathmin1,Calcium Signaling,Cardiac Hypertrophy Signaling,Cardiac β-adrenergic Signaling,CDK5 Signaling,Cellular Effects of Sildenafil (Viagra),Colorectal Cancer Metastasis Signaling,Corticotropin Releasing Hormone Signaling,CREB Signaling in Neurons,Dopamine Receptor S…	Human,Mouse,Rat	Adipose,Amygdala,BDCA-1+ dendritic cells,BDCA-3+ dendritic cells,Bladder,Brain,Central memory cytotoxic T cells,Cerebellum,Cerebral Cortex,Cytotoxic T cells,Dorsal Root Ganglion,Effector memory cytotoxic T cells,Effector memory RA+ cytotoxic T cells,Effector T cells,Heart,Hippocampus,Hypothalamus,Immature monocyte-derived dendritic cells,Kidney,Large Intestine,Liver,Lung,Mammary Gland,Mature mono…
rno-miR-132-3p	TargetScan Human	High (predicted)	PSMA2	proteasome (prosome, macropain) subunit, alpha type, 2	Cancer,Cardiovascular Disease,Developmental Disorder,Hematological Disease,Hereditary Disorder,Immunological Disease,Infectious Disease,Inflammatory Disease,Neurological Disease,Organismal Injury and Abnormalities,Renal and Urological Disease,Skeletal and Muscular Disorders	Cytoplasm	peptidase	Protein Ubiquitination Pathway	Human,Mouse,Rat	Activated CD56bright NK cells,Activated CD56dim NK cells,Activated helper T cells,Activated Vd1 Gamma-delta T cells,Activated Vd2 Gamma-delta T cells,Adipose,Amygdala,B lymphocytes not otherwise specified,BDCA-1+ dendritic cells,BDCA-3+ dendritic cells,Bladder,CD56bright NK cells,CD56dim NK cells,Central memory cytotoxic T cells,Central memory helper T cells,Cerebellum,Cerebral Cortex,Cytotoxic T…
rno-miR-132-3p	TargetScan Human	High (predicted)	PSMD12	proteasome (prosome, macropain) 26S subunit, non-ATPase, 12	Cancer,Endocrine System Disorders,Gastrointestinal Disease,Hepatic System Disease,Infectious Disease,Metabolic Disease,Organismal Injury and Abnormalities,Renal and Urological Disease,Reproductive System Disease	Cytoplasm	other	Protein Ubiquitination Pathway	Human,Mouse,Rat	Adipose,Amygdala,B lymphocytes not otherwise specified,Bladder,Cerebellum,Cerebral Cortex,Cytotoxic T cells,Dorsal Root Ganglion,Effector T cells,Epidermis,Heart,Hippocampus,Hypothalamus,Kidney,Large Intestine,Liver,Lung,Mammary Gland,Memory B cells,Naive B cells,Olfactory Bulb,Ovary,Pancreas,Pituitary Gland,Placenta,Prostate Gland,Retina,Salivary Gland,Skeletal Muscle,Small Intestine,Spleen,Stom…
rno-miR-132-3p	TargetScan Human	Moderate (predicted)	PTGS2	prostaglandin-endoperoxide synthase 2 (prostaglandin G/H synthase and cyclooxygenase)	Cancer,Cardiovascular Disease,Connective Tissue Disorders,Dermatological Diseases and Conditions,Developmental Disorder,Endocrine System Disorders,Gastrointestinal Disease,Hematological Disease,Hepatic System Disease,Hereditary Disorder,Immunological Disease,Infectious Disease,Inflammatory Disease,Inflammatory Response,Metabolic Disease,Neurological Disease,Nutritional Disease,Ophthalmic Disease,…	Cytoplasm	enzyme	CD40 Signaling,Cholecystokinin/Gastrin-mediated Signaling,Colorectal Cancer Metastasis Signaling,Corticotropin Releasing Hormone Signaling,Eicosanoid Signaling,Endothelin-1 Signaling,Fatty Acid α-oxidation,Glucocorticoid Receptor Signaling,HGF Signaling,IL-17 Signaling,IL-8 Signaling,ILK Signaling,LXR/RXR Activation,MIF Regulation of Innate Immunity,MIF-mediated Glucocorticoid Regulation,Ovarian …	Human,Mouse,Rat	Activated CD56dim NK cells,Activated Vd1 Gamma-delta T cells,Activated Vd2 Gamma-delta T cells,Adipocytes,Adipose,Adrenal Gland,Amygdala,B lymphocytes not otherwise specified,BDCA-1+ dendritic cells,BDCA-3+ dendritic cells,Bladder,Bone marrow-derived dendritic cells,Brain,Brainstem,Cartilage Tissue,Cerebellum,Cerebral Cortex,Chondrocytes,Cortical neurons,Dermis,Endothelial cells not otherwise spe…
rno-miR-132-3p	TargetScan Human	High (predicted)	PXN	paxillin	Cancer,Connective Tissue Disorders,Developmental Disorder,Immunological Disease,Inflammatory Disease,Inflammatory Response,Neurological Disease,Organismal Injury and Abnormalities,Reproductive System Disease,Respiratory Disease,Skeletal and Muscular Disorders,Tumor Morphology	Cytoplasm	other	Actin Cytoskeleton Signaling,Agrin Interactions at Neuromuscular Junction,Axonal Guidance Signaling,Cholecystokinin/Gastrin-mediated Signaling,CXCR4 Signaling,Ephrin B Signaling,Ephrin Receptor Signaling,ERK/MAPK Signaling,FAK Signaling,Fcγ Receptor-mediated Phagocytosis in Macrophages and Monocytes,Germ Cell-Sertoli Cell Junction Signaling,Gα12/13 Signaling,HGF Signaling,IGF-1 Signaling,ILK Sign…	Human,Mouse,Rat	Activated CD56bright NK cells,Activated helper T cells,Activated Vd1 Gamma-delta T cells,Activated Vd2 Gamma-delta T cells,Adipose,Amygdala,B lymphocytes not otherwise specified,BDCA-1+ dendritic cells,BDCA-3+ dendritic cells,Bladder,Brain,CD56bright NK cells,CD56dim NK cells,Central memory cytotoxic T cells,Central memory helper T cells,Cerebellum,Cerebral Cortex,Cytotoxic T cells,Dorsal Root Ga…
rno-miR-132-3p	TargetScan Human	High (predicted)	QKI	QKI, KH domain containing, RNA binding	Cancer,Connective Tissue Disorders,Endocrine System Disorders,Gastrointestinal Disease,Immunological Disease,Inflammatory Disease,Neurological Disease,Organismal Injury and Abnormalities,Psychological Disorders,Renal and Urological Disease,Reproductive System Disease,Respiratory Disease,Skeletal and Muscular Disorders	Nucleus	other		Human,Mouse,Rat	Activated CD56bright NK cells,Activated CD56dim NK cells,Activated helper T cells,Activated Vd1 Gamma-delta T cells,Activated Vd2 Gamma-delta T cells,Adipose,Amygdala,Astrocytes,B lymphocytes not otherwise specified,BDCA-1+ dendritic cells,BDCA-3+ dendritic cells,Bladder,Brain,CD56bright NK cells,CD56dim NK cells,Central memory cytotoxic T cells,Central memory helper T cells,Cerebellum,Cerebral C…
rno-miR-132-3p	TargetScan Human	High (predicted)	RAB1A	RAB1A, member RAS oncogene family	Antimicrobial Response,Cancer,Cardiovascular Disease,Developmental Disorder,Inflammatory Response,Neurological Disease,Organismal Injury and Abnormalities,Reproductive System Disease,Skeletal and Muscular Disorders	Cytoplasm	enzyme		Human,Mouse,Rat	Activated CD56bright NK cells,Activated CD56dim NK cells,Activated Vd1 Gamma-delta T cells,Activated Vd2 Gamma-delta T cells,Adipose,Amygdala,B lymphocytes not otherwise specified,BDCA-1+ dendritic cells,BDCA-3+ dendritic cells,Bladder,Central memory helper T cells,Cerebellum,Cerebral Cortex,Cytotoxic T cells,Dorsal Root Ganglion,Effector memory cytotoxic T cells,Effector memory helper T cells,Ef…
rno-miR-132-3p	TargetScan Human	High (predicted)	RAB6B	RAB6B, member RAS oncogene family	Cancer,Endocrine System Disorders,Infectious Disease,Neurological Disease,Psychological Disorders	Cytoplasm	enzyme		Human,Mouse,Rat	Amygdala,Brain,CD56bright NK cells,Cerebellum,Cerebral Cortex,Dorsal Root Ganglion,Heart,Hippocampus,Hypothalamus,Liver,Lung,Mast cells,Olfactory Bulb,Pituitary Gland,Retina,Substantia Nigra,Thymus,Vd2 Gamma-delta T cells,Other Colon Cancer Cell Lines,RXF-393,SK-N-SH
rno-miR-132-3p	TargetScan Human	Moderate (predicted)	RAD21	RAD21 homolog (S. pombe)	Cancer,Developmental Disorder,Gastrointestinal Disease,Hematological Disease,Hepatic System Disease,Hereditary Disorder,Immunological Disease,Infectious Disease,Organismal Injury and Abnormalities,Renal and Urological Disease	Nucleus	other	Mitotic Roles of Polo-Like Kinase	Human,Mouse,Rat	Adipose,Amygdala,B lymphocytes not otherwise specified,Bladder,Cerebellum,Cerebral Cortex,Cytotoxic T cells,Dorsal Root Ganglion,Effector T cells,Epidermis,Heart,Hippocampus,Hypothalamus,Kidney,Large Intestine,Liver,Lung,Mammary Gland,Memory B cells,Murine NKT cells,Naive B cells,Olfactory Bulb,Ovary,Pancreas,Pituitary Gland,Placenta,Prostate Gland,Retina,Salivary Gland,Skeletal Muscle,Small Inte…
rno-miR-132-3p	TargetScan Human	High (predicted)	RASA1	RAS p21 protein activator (GTPase activating protein) 1	Cancer,Cardiovascular Disease,Dermatological Diseases and Conditions,Developmental Disorder,Endocrine System Disorders,Gastrointestinal Disease,Hepatic System Disease,Hereditary Disorder,Inflammatory Response,Neurological Disease,Organismal Injury and Abnormalities,Renal and Urological Disease,Reproductive System Disease	Cytoplasm	transporter	3-phosphoinositide Biosynthesis,3-phosphoinositide Degradation,Angiopoietin Signaling,Axonal Guidance Signaling,Cdc42 Signaling,D-myo-inositol (1,4,5,6)-Tetrakisphosphate Biosynthesis,D-myo-inositol (3,4,5,6)-tetrakisphosphate Biosynthesis,D-myo-inositol-5-phosphate Metabolism,EGF Signaling,Ephrin Receptor Signaling,G-Protein Coupled Receptor Signaling,GDNF Family Ligand-Receptor Interactions,Gα1…	Human,Mouse,Rat	Activated CD56bright NK cells,Activated CD56dim NK cells,Activated helper T cells,Activated Vd1 Gamma-delta T cells,Activated Vd2 Gamma-delta T cells,Adipose,Amygdala,B lymphocytes not otherwise specified,BDCA-1+ dendritic cells,BDCA-3+ dendritic cells,Bladder,Brain,Central memory cytotoxic T cells,Central memory helper T cells,Cerebellum,Cerebral Cortex,Cytotoxic T cells,Dorsal Root Ganglion,Eff…
rno-miR-132-3p	Ingenuity Expert Findings,TargetScan Human	Experimentally Observed,High (predicted)	RB1	retinoblastoma 1	Auditory Disease,Cancer,Cardiovascular Disease,Connective Tissue Disorders,Dermatological Diseases and Conditions,Developmental Disorder,Endocrine System Disorders,Gastrointestinal Disease,Hematological Disease,Hepatic System Disease,Hereditary Disorder,Immunological Disease,Infectious Disease,Inflammatory Disease,Metabolic Disease,Neurological Disease,Nutritional Disease,Ophthalmic Disease,Organ…	Nucleus	transcription regulator	Antiproliferative Role of TOB in T Cell Signaling,Aryl Hydrocarbon Receptor Signaling,Bladder Cancer Signaling,Cell Cycle Regulation by BTG Family Proteins,Cell Cycle: G1/S Checkpoint Regulation,Chronic Myeloid Leukemia Signaling,Cyclins and Cell Cycle Regulation,Estrogen-mediated S-phase Entry,Glioblastoma Multiforme Signaling,Glioma Signaling,Hereditary Breast Cancer Signaling,Melanoma Signalin…	Human,Mouse,Rat	Activated CD56bright NK cells,Activated CD56dim NK cells,Activated helper T cells,Activated Vd1 Gamma-delta T cells,Activated Vd2 Gamma-delta T cells,Adipose,Amygdala,B lymphocytes not otherwise specified,BDCA-1+ dendritic cells,BDCA-3+ dendritic cells,Bladder,Central memory cytotoxic T cells,Central memory helper T cells,Cerebellum,Cerebral Cortex,Cytotoxic T cells,Dermis,Dorsal Root Ganglion,Ef…
rno-miR-132-3p	TargetScan Human	High (predicted)	RORA	RAR-related orphan receptor A	Cancer,Cardiovascular Disease,Endocrine System Disorders,Gastrointestinal Disease,Hematological Disease,Hepatic System Disease,Immunological Disease,Inflammatory Disease,Inflammatory Response,Metabolic Disease,Neurological Disease,Organismal Injury and Abnormalities,Reproductive System Disease,Respiratory Disease	Nucleus	ligand-dependent nuclear receptor	Melatonin Signaling	Human,Mouse,Rat	Adipose,Adrenal Gland,Amygdala,B lymphocytes not otherwise specified,Bladder,Brain,Cartilage Tissue,Cerebellum,Cerebral Cortex,Chondrocytes,Cytotoxic T cells,Dorsal Root Ganglion,Effector memory cytotoxic T cells,Effector memory RA+ cytotoxic T cells,Effector T cells,Epidermis,Epithelial cells not otherwise specified,Heart,Hematopoietic progenitor cells,Hippocampus,Hypothalamus,Kidney,Large Intes…
rno-miR-132-3p	TargetScan Human	High (predicted)	RUNX1T1	runt-related transcription factor 1; translocated to, 1 (cyclin D-related)	Cancer,Cardiovascular Disease,Endocrine System Disorders,Gastrointestinal Disease,Hematological Disease,Hepatic System Disease,Immunological Disease,Nutritional Disease,Organismal Injury and Abnormalities,Reproductive System Disease,Tumor Morphology	Nucleus	transcription regulator	Adipogenesis pathway	Human,Mouse,Rat	Adipose,Amygdala,Bladder,Brain,Central memory cytotoxic T cells,Cerebellum,Cerebral Cortex,Dorsal Root Ganglion,Effector memory RA+ cytotoxic T cells,Epidermis,Heart,Hippocampus,Hypothalamus,Large Intestine,Lung,Lymph node,Mature monocyte-derived dendritic cells,Olfactory Bulb,Ovary,Peripheral blood lymphocytes,Pituitary Gland,Retina,Skeletal Muscle,Stomach,Substantia Nigra,Testis,Uterus,A549-ATC…
rno-miR-132-3p	TargetScan Human	High (predicted)	SAMD12	sterile alpha motif domain containing 12	Cancer,Cardiovascular Disease,Dermatological Diseases and Conditions,Endocrine System Disorders,Gastrointestinal Disease,Metabolic Disease,Organismal Injury and Abnormalities	Other	other		Human,Mouse,Rat	Amygdala,Cerebellum,Cerebral Cortex,Dorsal Root Ganglion,Hippocampus,Large Intestine,Liver,Lung,Olfactory Bulb,Pituitary Gland,Prostate Gland,Substantia Nigra
rno-miR-132-3p	TargetScan Human	High (predicted)	SCN3A	sodium channel, voltage-gated, type III, alpha subunit	Cancer,Connective Tissue Disorders,Dermatological Diseases and Conditions,Developmental Disorder,Gastrointestinal Disease,Hereditary Disorder,Inflammatory Disease,Neurological Disease,Nutritional Disease,Ophthalmic Disease,Organismal Injury and Abnormalities,Psychological Disorders,Reproductive System Disease,Skeletal and Muscular Disorders	Plasma Membrane	ion channel		Human,Mouse,Rat	Beta islet cells,Brain,Cerebral Cortex,Cytotoxic T cells,Dorsal Root Ganglion,Effector T cells,Liver,Olfactory Bulb,Other Nervous System,Other Neurons,Pancreas,Pituitary Gland,HS 578T
rno-miR-132-3p	TargetScan Human	High (predicted)	SETD5	SET domain containing 5	Cancer,Developmental Disorder,Gastrointestinal Disease,Hepatic System Disease,Hereditary Disorder,Neurological Disease	Other	other		Human,Mouse,Rat	Adipose,Amygdala,B lymphocytes not otherwise specified,BDCA-1+ dendritic cells,BDCA-3+ dendritic cells,Bladder,Central memory cytotoxic T cells,Cerebellum,Cerebral Cortex,Cytotoxic T cells,Dorsal Root Ganglion,Effector memory cytotoxic T cells,Effector memory RA+ cytotoxic T cells,Effector T cells,Epidermis,Heart,Hippocampus,Hypothalamus,Immature monocyte-derived dendritic cells,Kidney,Large Inte…
rno-miR-132-3p	TargetScan Human	High (predicted)	SIRT1	sirtuin 1	Cancer,Cardiovascular Disease,Connective Tissue Disorders,Developmental Disorder,Endocrine System Disorders,Gastrointestinal Disease,Hematological Disease,Hepatic System Disease,Hereditary Disorder,Immunological Disease,Infectious Disease,Inflammatory Disease,Inflammatory Response,Metabolic Disease,Neurological Disease,Nutritional Disease,Ophthalmic Disease,Organismal Injury and Abnormalities,Psy…	Nucleus	transcription regulator	Adipogenesis pathway,p53 Signaling	Human,Mouse,Rat	Adipocytes,Adipose,Amygdala,B lymphocytes not otherwise specified,Bladder,Brain,Cardiomyocytes,Cartilage Tissue,Cerebellum,Cerebral Cortex,Cytotoxic T cells,Dendritic cells not otherwise specified,Dorsal Root Ganglion,Effector T cells,Epidermis,Heart,Hepatocytes,Hippocampus,Hypothalamus,Immune cells not otherwise specified,Kidney,Large Intestine,Liver,Lung,Mammary Gland,Olfactory Bulb,Other Cells…
rno-miR-132-3p	TargetScan Human	Moderate (predicted)	SLC12A1	solute carrier family 12 (sodium/potassium/chloride transporter), member 1	Cancer,Cardiovascular Disease,Connective Tissue Disorders,Developmental Disorder,Endocrine System Disorders,Hematological Disease,Hereditary Disorder,Immunological Disease,Inflammatory Disease,Metabolic Disease,Organismal Injury and Abnormalities,Renal and Urological Disease,Reproductive System Disease,Respiratory Disease,Skeletal and Muscular Disorders	Plasma Membrane	transporter	Aldosterone Signaling in Epithelial Cells	Human,Mouse,Rat	Activated CD56dim NK cells,Adipose,Amygdala,B lymphocytes not otherwise specified,Bladder,Cerebellum,Cerebral Cortex,Cytotoxic T cells,Dorsal Root Ganglion,Effector T cells,Epidermis,Epithelial cells not otherwise specified,Heart,Hippocampus,Hypothalamus,Kidney,Large Intestine,Liver,Lung,Mammary Gland,Olfactory Bulb,Ovary,Pancreas,Pituitary Gland,Placenta,Prostate Gland,Retina,Skeletal Muscle,Sma…
rno-miR-132-3p	TargetScan Human	Moderate (predicted)	SLC1A3	solute carrier family 1 (glial high affinity glutamate transporter), member 3	Auditory Disease,Cancer,Cardiovascular Disease,Connective Tissue Disorders,Developmental Disorder,Gastrointestinal Disease,Hepatic System Disease,Hereditary Disorder,Inflammatory Disease,Metabolic Disease,Neurological Disease,Ophthalmic Disease,Organismal Injury and Abnormalities,Psychological Disorders,Renal and Urological Disease,Reproductive System Disease,Skeletal and Muscular Disorders	Plasma Membrane	transporter	Glutamate Receptor Signaling	Human,Mouse,Rat	Activated Vd2 Gamma-delta T cells,Adipose,Amygdala,Astrocytes,Bladder,Brain,Brainstem,Cerebellum,Cerebral Cortex,Cerebral Ventricles,Cytotoxic T cells,Dorsal Root Ganglion,Effector T cells,Epidermis,Granule Cell Layer,Gray Matter,Heart,Hippocampus,Hypothalamus,Immature monocyte-derived dendritic cells,Kidney,Large Intestine,Liver,Lung,Mammary Gland,Mature monocyte-derived dendritic cells,Monocyte…
rno-miR-132-3p	TargetScan Human	Moderate (predicted)	SLC1A4	solute carrier family 1 (glutamate/neutral amino acid transporter), member 4	Cancer,Connective Tissue Disorders,Developmental Disorder,Gastrointestinal Disease,Hepatic System Disease,Hereditary Disorder,Inflammatory Disease,Neurological Disease,Ophthalmic Disease,Organismal Injury and Abnormalities,Psychological Disorders,Renal and Urological Disease,Reproductive System Disease,Skeletal and Muscular Disorders	Plasma Membrane	transporter	Glutamate Receptor Signaling	Human,Mouse,Rat	Activated helper T cells,Amygdala,B lymphocytes not otherwise specified,BDCA-1+ dendritic cells,BDCA-3+ dendritic cells,Bladder,Brain,Central memory cytotoxic T cells,Cerebellum,Cerebral Cortex,Dorsal Root Ganglion,Effector memory cytotoxic T cells,Effector memory RA+ cytotoxic T cells,Epidermis,Heart,Hippocampus,Hypothalamus,Kidney,Large Intestine,Lung,Mammary Gland,Mature monocyte-derived dendr…
rno-miR-132-3p	TargetScan Human	High (predicted)	SLC23A2	solute carrier family 23 (ascorbic acid transporter), member 2	Cancer,Dermatological Diseases and Conditions,Endocrine System Disorders,Gastrointestinal Disease,Organismal Injury and Abnormalities,Reproductive System Disease,Respiratory Disease	Plasma Membrane	transporter	Antioxidant Action of Vitamin C,Vitamin-C Transport	Human,Mouse,Rat	Activated CD56bright NK cells,Activated Vd1 Gamma-delta T cells,Activated Vd2 Gamma-delta T cells,Adipose,Amygdala,B lymphocytes not otherwise specified,BDCA-1+ dendritic cells,BDCA-3+ dendritic cells,Bladder,Central memory cytotoxic T cells,Cerebellum,Cerebral Cortex,Cytotoxic T cells,Dorsal Root Ganglion,Effector memory cytotoxic T cells,Effector memory RA+ cytotoxic T cells,Effector T cells,Ep…
rno-miR-132-3p	TargetScan Human	High (predicted)	SLC25A20	solute carrier family 25 (carnitine/acylcarnitine translocase), member 20	Developmental Disorder,Hereditary Disorder,Metabolic Disease	Cytoplasm	transporter		Human,Mouse,Rat	Activated CD56bright NK cells,Activated CD56dim NK cells,Activated helper T cells,Activated Vd1 Gamma-delta T cells,Activated Vd2 Gamma-delta T cells,Adipose,Amygdala,B lymphocytes not otherwise specified,BDCA-1+ dendritic cells,BDCA-3+ dendritic cells,Bladder,Brain,CD56bright NK cells,Central memory cytotoxic T cells,Central memory helper T cells,Cerebellum,Cerebral Cortex,Cytotoxic T cells,Dors…
rno-miR-132-3p	TargetScan Human	High (predicted)	SLC2A1	solute carrier family 2 (facilitated glucose transporter), member 1	Cancer,Cardiovascular Disease,Developmental Disorder,Gastrointestinal Disease,Hematological Disease,Hepatic System Disease,Hereditary Disorder,Immunological Disease,Infectious Disease,Metabolic Disease,Neurological Disease,Organismal Injury and Abnormalities,Psychological Disorders,Reproductive System Disease	Plasma Membrane	transporter	AMPK Signaling,Antioxidant Action of Vitamin C,HIF1α Signaling,Renal Cell Carcinoma Signaling,TR/RXR Activation,Vitamin-C Transport	Human,Mouse,Rat	Adipocytes,Adipose,Amygdala,Astrocytes,B lymphocytes not otherwise specified,Bladder,Brain,Cartilage Tissue,Cerebellum,Cerebral Cortex,Chondrocytes,Cytotoxic T cells,Dermis,Dorsal Root Ganglion,Effector T cells,Epidermis,Fibroblasts,Granulosa cells,Heart,Hepatocytes,Hippocampus,HUVEC cells,Hypothalamus,Keratinocytes,Kidney,Large Intestine,Liver,Lung,Macrophages not otherwise specified,Mammary Gla…
rno-miR-132-3p	TargetScan Human	High (predicted)	SLC6A3	solute carrier family 6 (neurotransmitter transporter), member 3	Auditory Disease,Cancer,Cardiovascular Disease,Connective Tissue Disorders,Dermatological Diseases and Conditions,Developmental Disorder,Endocrine System Disorders,Gastrointestinal Disease,Hematological Disease,Hepatic System Disease,Hereditary Disorder,Immunological Disease,Infectious Disease,Inflammatory Disease,Inflammatory Response,Metabolic Disease,Neurological Disease,Nutritional Disease,Op…	Plasma Membrane	transporter	Dopamine Receptor Signaling	Human,Mouse,Rat	Blood platelets,Brain,Cerebral Cortex,Cytotoxic T cells,Effector T cells,Hypothalamus,Liver,Neurons not otherwise specified,Olfactory Bulb,Other Cells,Other Nervous System,Other Neurons,Pancreas,Pituitary Gland,Placenta,Salivary Gland,Small Intestine,Substantia Nigra,Other Cell Line,Other Leukemia Cell Lines
rno-miR-132-3p	TargetScan Human	High (predicted)	SMAD2	SMAD family member 2	Cancer,Cardiovascular Disease,Connective Tissue Disorders,Dental Disease,Developmental Disorder,Endocrine System Disorders,Gastrointestinal Disease,Hepatic System Disease,Immunological Disease,Infectious Disease,Inflammatory Disease,Inflammatory Response,Neurological Disease,Organismal Injury and Abnormalities,Renal and Urological Disease,Reproductive System Disease,Skeletal and Muscular Disorders	Nucleus	transcription regulator	Antiproliferative Role of TOB in T Cell Signaling,Colorectal Cancer Metastasis Signaling,Factors Promoting Cardiogenesis in Vertebrates,Glucocorticoid Receptor Signaling,Hepatic Fibrosis / Hepatic Stellate Cell Activation,HIPPO signaling,Human Embryonic Stem Cell Pluripotency,Molecular Mechanisms of Cancer,Pancreatic Adenocarcinoma Signaling,PPARα/RXRα Activation,RAR Activation,Regulation of IL-2…	Human,Mouse,Rat	Activated CD56bright NK cells,Activated CD56dim NK cells,Activated helper T cells,Activated Vd1 Gamma-delta T cells,Activated Vd2 Gamma-delta T cells,Adipose,Amygdala,Astrocytes,B lymphocytes not otherwise specified,BDCA-1+ dendritic cells,BDCA-3+ dendritic cells,Bladder,Brain,CD56bright NK cells,CD56dim NK cells,Central memory cytotoxic T cells,Central memory helper T cells,Cerebellum,Cerebral C…
rno-miR-132-3p	TargetScan Human	High (predicted)	SMAD5	SMAD family member 5	Cancer,Cardiovascular Disease,Connective Tissue Disorders,Developmental Disorder,Gastrointestinal Disease,Hepatic System Disease,Neurological Disease,Organismal Injury and Abnormalities,Reproductive System Disease,Skeletal and Muscular Disorders	Nucleus	transcription regulator	Adipogenesis pathway,BMP signaling pathway,Factors Promoting Cardiogenesis in Vertebrates,HIPPO signaling,Human Embryonic Stem Cell Pluripotency,Molecular Mechanisms of Cancer,Mouse Embryonic Stem Cell Pluripotency,RAR Activation,Role of NANOG in Mammalian Embryonic Stem Cell Pluripotency,Role of Osteoblasts, Osteoclasts and Chondrocytes in Rheumatoid Arthritis,TGF-β Signaling	Human,Mouse,Rat	Activated Vd1 Gamma-delta T cells,Activated Vd2 Gamma-delta T cells,Adipose,Amygdala,B lymphocytes not otherwise specified,BDCA-1+ dendritic cells,BDCA-3+ dendritic cells,Bladder,Bone marrow cells not otherwise specified,Brain,Cells not otherwise specified,Central memory cytotoxic T cells,Cerebellum,Cytotoxic T cells,Dorsal Root Ganglion,Effector memory cytotoxic T cells,Effector memory RA+ cytot…
rno-miR-132-3p	TargetScan Human	High (predicted)	SNX18	sorting nexin 18	Cancer,Endocrine System Disorders,Gastrointestinal Disease,Organismal Injury and Abnormalities,Reproductive System Disease	Cytoplasm	transporter		Human,Mouse,Rat	Activated helper T cells,Adipose,Amygdala,B lymphocytes not otherwise specified,BDCA-1+ dendritic cells,BDCA-3+ dendritic cells,Bladder,Central memory cytotoxic T cells,Cerebellum,Cerebral Cortex,Cytotoxic T cells,Dorsal Root Ganglion,Effector memory cytotoxic T cells,Effector memory RA+ cytotoxic T cells,Effector T cells,Epidermis,Heart,Hippocampus,Hypothalamus,Immature monocyte-derived dendriti…
rno-miR-132-3p	TargetScan Human	Moderate (predicted)	SNX7	sorting nexin 7	Cancer,Endocrine System Disorders	Other	transporter		Human,Mouse,Rat	Amygdala,B lymphocytes not otherwise specified,Bladder,Cerebellum,Cerebral Cortex,Cytotoxic T cells,Dorsal Root Ganglion,Effector T cells,Epidermis,Heart,Hippocampus,Hypothalamus,Kidney,Large Intestine,Lung,Mammary Gland,Olfactory Bulb,Ovary,Pancreas,Pituitary Gland,Placenta,Prostate Gland,Retina,Skeletal Muscle,Small Intestine,Spleen,Stomach,Substantia Nigra,Testis,Thymus,786-0,A498,A549-ATCC,AC…
rno-miR-132-3p	TargetScan Human	High (predicted),Moderate (predicted)	SOD2	superoxide dismutase 2, mitochondrial	Cancer,Cardiovascular Disease,Connective Tissue Disorders,Dermatological Diseases and Conditions,Developmental Disorder,Endocrine System Disorders,Gastrointestinal Disease,Hematological Disease,Hepatic System Disease,Hereditary Disorder,Immunological Disease,Infectious Disease,Inflammatory Disease,Inflammatory Response,Metabolic Disease,Neurological Disease,Organismal Injury and Abnormalities,Psy…	Cytoplasm	enzyme	Acute Phase Response Signaling,Mitochondrial Dysfunction,NRF2-mediated Oxidative Stress Response,PEDF Signaling,Superoxide Radicals Degradation	Human,Mouse,Rat	Activated Vd1 Gamma-delta T cells,Activated Vd2 Gamma-delta T cells,Adipose,Amygdala,B lymphocytes not otherwise specified,BDCA-1+ dendritic cells,BDCA-3+ dendritic cells,Beta islet cells,Bladder,Brain,CD56dim NK cells,Central memory cytotoxic T cells,Central memory helper T cells,Cerebellum,Cerebral Cortex,Cytotoxic T cells,Dorsal Root Ganglion,Effector memory cytotoxic T cells,Effector memory h…
rno-miR-132-3p	TargetScan Human	Moderate (predicted)	SOX11	SRY (sex determining region Y)-box 11	Cancer,Cardiovascular Disease,Connective Tissue Disorders,Dental Disease,Developmental Disorder,Endocrine System Disorders,Gastrointestinal Disease,Hematological Disease,Hepatic System Disease,Hereditary Disorder,Immunological Disease,Neurological Disease,Ophthalmic Disease,Organismal Injury and Abnormalities,Reproductive System Disease,Respiratory Disease,Skeletal and Muscular Disorders	Nucleus	transcription regulator	Wnt/β-catenin Signaling	Human,Mouse,Rat	Amygdala,B lymphocytes not otherwise specified,Bladder,Cerebellum,Cerebral Cortex,Cytotoxic T cells,Dorsal Root Ganglion,Effector T cells,Epidermis,Hippocampus,Hypothalamus,Kidney,Large Intestine,Liver,Lung,Mammary Gland,Neurons not otherwise specified,Olfactory Bulb,Other Nervous System,Other Neurons,Ovary,Pancreas,Pituitary Gland,Placenta,Prostate Gland,Retina,Salivary Gland,Skeletal Muscle,Sma…
rno-miR-132-3p	TargetScan Human	High (predicted)	SOX4	SRY (sex determining region Y)-box 4	Cancer,Cardiovascular Disease,Connective Tissue Disorders,Dental Disease,Developmental Disorder,Gastrointestinal Disease,Hematological Disease,Hepatic System Disease,Hereditary Disorder,Immunological Disease,Infectious Disease,Neurological Disease,Ophthalmic Disease,Organismal Injury and Abnormalities,Reproductive System Disease,Respiratory Disease,Skeletal and Muscular Disorders	Nucleus	transcription regulator	Wnt/β-catenin Signaling	Human,Mouse,Rat	Activated helper T cells,Activated Vd1 Gamma-delta T cells,Activated Vd2 Gamma-delta T cells,Adipose,Amygdala,B lymphocytes not otherwise specified,BDCA-1+ dendritic cells,BDCA-3+ dendritic cells,Bladder,Bone marrow cells not otherwise specified,CD56bright NK cells,CD56dim NK cells,Central memory cytotoxic T cells,Central memory helper T cells,Cerebellum,Cerebral Cortex,Crypt,Cytotoxic T cells,Do…
rno-miR-132-3p	TargetScan Human	High (predicted)	SOX5	SRY (sex determining region Y)-box 5	Cancer,Developmental Disorder,Endocrine System Disorders,Gastrointestinal Disease,Neurological Disease,Psychological Disorders	Nucleus	transcription regulator	Wnt/β-catenin Signaling	Human,Mouse,Rat	Adipose,Amygdala,B lymphocytes not otherwise specified,Bladder,Brain,Cerebellum,Cerebral Cortex,Cytotoxic T cells,Dorsal Root Ganglion,Effector T cells,Epidermis,Heart,Hippocampus,Hypothalamus,Kidney,Large Intestine,Liver,Lung,Mammary Gland,Memory B cells,Naive B cells,Olfactory Bulb,Other Cells,Other Organ Systems,Other Tissues and Primary Cells,Ovary,Pancreas,Pituitary Gland,Placenta,Prostate G…
rno-miR-132-3p	TargetScan Human	High (predicted)	SPAST	spastin	Cancer,Endocrine System Disorders,Gastrointestinal Disease,Hereditary Disorder,Infectious Disease,Neurological Disease,Organismal Injury and Abnormalities,Psychological Disorders,Reproductive System Disease,Tumor Morphology	Nucleus	enzyme		Human,Mouse,Rat	Activated Vd1 Gamma-delta T cells,Activated Vd2 Gamma-delta T cells,Adipose,Amygdala,B lymphocytes not otherwise specified,BDCA-1+ dendritic cells,BDCA-3+ dendritic cells,Bladder,Brain,Central memory cytotoxic T cells,Central memory helper T cells,Cerebellum,Cerebral Cortex,Cytotoxic T cells,Dorsal Root Ganglion,Effector memory cytotoxic T cells,Effector memory helper T cells,Effector memory RA+ …
rno-miR-132-3p	TargetScan Human	High (predicted)	SPRED1	sprouty-related, EVH1 domain containing 1	Cancer,Cardiovascular Disease,Connective Tissue Disorders,Dermatological Diseases and Conditions,Developmental Disorder,Endocrine System Disorders,Gastrointestinal Disease,Hereditary Disorder,Hypersensitivity Response,Immunological Disease,Inflammatory Disease,Metabolic Disease,Neurological Disease,Organismal Injury and Abnormalities,Respiratory Disease	Plasma Membrane	other		Human,Mouse,Rat	Adipose,Amygdala,B lymphocytes not otherwise specified,BDCA-1+ dendritic cells,Bladder,Cerebellum,Cerebral Cortex,Cytotoxic T cells,Dorsal Root Ganglion,Effector T cells,Epidermis,Heart,Hippocampus,Hypothalamus,Immature monocyte-derived dendritic cells,Kidney,Large Intestine,Liver,Lung,Mammary Gland,Mature monocyte-derived dendritic cells,Monocyte-derived macrophage,Olfactory Bulb,Other Tissues a…
rno-miR-132-3p	TargetScan Human	High (predicted)	STX16	syntaxin 16	Cancer,Developmental Disorder,Endocrine System Disorders,Gastrointestinal Disease,Hematological Disease,Hereditary Disorder,Metabolic Disease	Cytoplasm	transporter	Huntington's Disease Signaling,Tight Junction Signaling	Human,Mouse,Rat	Adipose,Amygdala,B lymphocytes not otherwise specified,Bladder,Cerebellum,Cerebral Cortex,Cytotoxic T cells,Dorsal Root Ganglion,Effector T cells,Epidermis,Heart,Hepatocytes,Hippocampus,Hypothalamus,Kidney,Large Intestine,Liver,Lung,Mammary Gland,Memory B cells,Naive B cells,Olfactory Bulb,Ovary,Pancreas,Pituitary Gland,Placenta,Prostate Gland,Retina,Salivary Gland,Skeletal Muscle,Small Intestine…
rno-miR-132-3p	TargetScan Human	Moderate (predicted)	SUDS3	suppressor of defective silencing 3 homolog (S. cerevisiae)	Cancer,Endocrine System Disorders,Gastrointestinal Disease	Nucleus	other	DNA Methylation and Transcriptional Repression Signaling	Human,Mouse,Rat	Activated helper T cells,Adipose,Amygdala,B lymphocytes not otherwise specified,BDCA-1+ dendritic cells,BDCA-3+ dendritic cells,Bladder,Central memory cytotoxic T cells,Cerebellum,Cerebral Cortex,Cytotoxic T cells,Dorsal Root Ganglion,Effector memory cytotoxic T cells,Effector memory RA+ cytotoxic T cells,Effector T cells,Epidermis,Heart,Hippocampus,Hypothalamus,Immature monocyte-derived dendriti…
rno-miR-132-3p	TargetScan Human	High (predicted)	SV2A	synaptic vesicle glycoprotein 2A	Cancer,Cardiovascular Disease,Developmental Disorder,Gastrointestinal Disease,Hepatic System Disease,Hereditary Disorder,Inflammatory Disease,Metabolic Disease,Neurological Disease,Organismal Injury and Abnormalities,Psychological Disorders,Renal and Urological Disease,Reproductive System Disease,Skeletal and Muscular Disorders	Cytoplasm	transporter		Human,Mouse,Rat	Amygdala,Brain,Brainstem,Cerebellum,Cerebral Cortex,Dorsal Root Ganglion,Effector memory cytotoxic T cells,Hippocampus,Hypothalamus,Olfactory Bulb,Pituitary Gland,Retina,Spinal Cord,Substantia Nigra,Th1 cells,Th2 cells,Vd1 Gamma-delta T cells,Vd2 Gamma-delta T cells,ACHN,CAKI-1,CCRF-CEM,DU-145,HeLa,HepG2,HOP-62,HOP-92,HS 578T,M14,MALME-3M,MDA-MB-435,MOLT-4,NCI-ADR-RES,NCI-H23,NCI-H522,OVCAR-3,OVC…
rno-miR-132-3p	TargetScan Human	High (predicted)	TCF7L2	transcription factor 7-like 2 (T-cell specific, HMG-box)	Cancer,Connective Tissue Disorders,Developmental Disorder,Endocrine System Disorders,Gastrointestinal Disease,Hematological Disease,Hepatic System Disease,Immunological Disease,Inflammatory Disease,Metabolic Disease,Neurological Disease,Nutritional Disease,Organismal Injury and Abnormalities,Psychological Disorders,Reproductive System Disease,Skeletal and Muscular Disorders,Tumor Morphology	Nucleus	transcription regulator	Acute Myeloid Leukemia Signaling,Basal Cell Carcinoma Signaling,Colorectal Cancer Metastasis Signaling,Epithelial Adherens Junction Signaling,Factors Promoting Cardiogenesis in Vertebrates,Human Embryonic Stem Cell Pluripotency,Mouse Embryonic Stem Cell Pluripotency,Ovarian Cancer Signaling,Protein Kinase A Signaling,Regulation of the Epithelial-Mesenchymal Transition Pathway,Role of Macrophages,…	Human,Mouse,Rat	Activated CD56dim NK cells,Activated Vd1 Gamma-delta T cells,Adipose,Amygdala,BDCA-1+ dendritic cells,BDCA-3+ dendritic cells,Beta islet cells,Bladder,Cerebellum,Cerebral Cortex,Cytotoxic T cells,Dorsal Root Ganglion,Effector memory cytotoxic T cells,Effector memory RA+ cytotoxic T cells,Effector T cells,Epidermis,Heart,Hippocampus,HUVEC cells,Hypothalamus,Immature monocyte-derived dendritic cell…
rno-miR-132-3p	TargetScan Human	High (predicted)	TEAD1	TEA domain family member 1 (SV40 transcriptional enhancer factor)	Cardiovascular Disease,Connective Tissue Disorders,Developmental Disorder,Hereditary Disorder,Neurological Disease,Ophthalmic Disease,Organismal Injury and Abnormalities,Skeletal and Muscular Disorders	Nucleus	transcription regulator	HIPPO signaling	Human,Mouse,Rat	Activated Vd1 Gamma-delta T cells,Adipose,Amygdala,Bladder,Brain,Cerebellum,Cerebral Cortex,Dorsal Root Ganglion,Effector memory cytotoxic T cells,Epidermis,Heart,Hippocampus,Hypothalamus,Kidney,Large Intestine,Liver,Lung,Mammary Gland,Natural T-regulatory cells,Olfactory Bulb,Oocytes,Other Organ Systems,Other Tissues and Primary Cells,Ovary,Pancreas,Pituitary Gland,Placenta,Prostate Gland,Retina…
rno-miR-132-3p	TargetScan Human	Moderate (predicted)	TECPR2	tectonin beta-propeller repeat containing 2	Cancer,Endocrine System Disorders,Gastrointestinal Disease,Hepatic System Disease,Hereditary Disorder,Neurological Disease,Organismal Injury and Abnormalities,Reproductive System Disease	Other	other		Human,Mouse,Rat	Activated CD56bright NK cells,Activated CD56dim NK cells,Activated Vd1 Gamma-delta T cells,Activated Vd2 Gamma-delta T cells,Adipose,Amygdala,B lymphocytes not otherwise specified,BDCA-1+ dendritic cells,BDCA-3+ dendritic cells,Bladder,Cerebellum,Cerebral Cortex,Cytotoxic T cells,Dorsal Root Ganglion,Effector T cells,Epidermis,Hippocampus,Hypothalamus,Kidney,Large Intestine,Lung,Mammary Gland,Neu…
rno-miR-132-3p	TargetScan Human	Moderate (predicted)	TFDP1	transcription factor Dp-1	Cancer,Connective Tissue Disorders,Developmental Disorder,Gastrointestinal Disease,Hematological Disease,Hereditary Disorder,Immunological Disease,Neurological Disease,Organismal Injury and Abnormalities,Reproductive System Disease,Skeletal and Muscular Disorders	Nucleus	transcription regulator	Aryl Hydrocarbon Receptor Signaling,Bladder Cancer Signaling,Cell Cycle: G1/S Checkpoint Regulation,Chronic Myeloid Leukemia Signaling,Cyclins and Cell Cycle Regulation,Estrogen-mediated S-phase Entry,Glioma Signaling,Molecular Mechanisms of Cancer,Non-Small Cell Lung Cancer Signaling,Ovarian Cancer Signaling,Pancreatic Adenocarcinoma Signaling,Prostate Cancer Signaling,Small Cell Lung Cancer Sig…	Human,Mouse,Rat	Activated CD56bright NK cells,Activated CD56dim NK cells,Activated helper T cells,Activated Vd1 Gamma-delta T cells,Activated Vd2 Gamma-delta T cells,Adipose,Amygdala,B lymphocytes not otherwise specified,BDCA-1+ dendritic cells,BDCA-3+ dendritic cells,Bladder,Brain,CD56bright NK cells,CD56dim NK cells,Central memory cytotoxic T cells,Central memory helper T cells,Cerebellum,Cerebral Cortex,Cytot…
rno-miR-132-3p	TargetScan Human	Moderate (predicted)	TGFB2	transforming growth factor, beta 2	Cancer,Cardiovascular Disease,Connective Tissue Disorders,Dental Disease,Dermatological Diseases and Conditions,Developmental Disorder,Endocrine System Disorders,Gastrointestinal Disease,Hematological Disease,Hepatic System Disease,Hereditary Disorder,Immunological Disease,Infectious Disease,Inflammatory Disease,Inflammatory Response,Neurological Disease,Ophthalmic Disease,Organismal Injury and A…	Extracellular Space	growth factor	Antiproliferative Role of TOB in T Cell Signaling,Aryl Hydrocarbon Receptor Signaling,Cardiac Hypertrophy Signaling,Cell Cycle: G1/S Checkpoint Regulation,Chronic Myeloid Leukemia Signaling,Colorectal Cancer Metastasis Signaling,Cyclins and Cell Cycle Regulation,Epithelial Adherens Junction Signaling,Factors Promoting Cardiogenesis in Vertebrates,Germ Cell-Sertoli Cell Junction Signaling,Glucocor…	Human,Mouse,Rat	Adipose,Amygdala,Astrocytes,B lymphocytes not otherwise specified,Bladder,Brain,Brainstem,CD56bright NK cells,Cerebellum,Cerebral Cortex,Cerebral Ventricles,Choroid Plexus,Crypt,Cytotoxic T cells,Dorsal Root Ganglion,Effector T cells,Epidermis,Epithelial cells not otherwise specified,Fibroblasts,Granule cells,Granulosa cells,Heart,Hippocampus,Hypothalamus,Kidney,Large Intestine,Liver,Lung,Mammary…
rno-miR-132-3p	TargetScan Human	Moderate (predicted)	TIA1	TIA1 cytotoxic granule-associated RNA binding protein	Cancer,Connective Tissue Disorders,Developmental Disorder,Gastrointestinal Disease,Hepatic System Disease,Hereditary Disorder,Inflammatory Disease,Inflammatory Response,Skeletal and Muscular Disorders	Nucleus	other		Human,Mouse,Rat	Activated CD56bright NK cells,Activated CD56dim NK cells,Activated helper T cells,Activated Vd1 Gamma-delta T cells,Activated Vd2 Gamma-delta T cells,Adipose,Amygdala,B lymphocytes not otherwise specified,BDCA-1+ dendritic cells,BDCA-3+ dendritic cells,Bladder,Brain,Central memory cytotoxic T cells,Central memory helper T cells,Cerebellum,Cerebral Cortex,Cytotoxic T cells,Dorsal Root Ganglion,Eff…
rno-miR-132-3p	miRecords	Experimentally Observed	TJP1	tight junction protein 1	Cancer,Connective Tissue Disorders,Endocrine System Disorders,Gastrointestinal Disease,Hematological Disease,Hepatic System Disease,Immunological Disease,Inflammatory Disease,Neurological Disease,Ophthalmic Disease,Renal and Urological Disease,Skeletal and Muscular Disorders	Plasma Membrane	other	Germ Cell-Sertoli Cell Junction Signaling,Sertoli Cell-Sertoli Cell Junction Signaling,Tight Junction Signaling	Human,Mouse,Rat	Activated CD56bright NK cells,Activated CD56dim NK cells,Activated Vd2 Gamma-delta T cells,Adipose,Amygdala,Astrocytes,B lymphocytes not otherwise specified,Bladder,Brain,CD56bright NK cells,CD56dim NK cells,Central memory helper T cells,Cerebellum,Cerebral Cortex,Cytotoxic T cells,Dorsal Root Ganglion,Effector memory helper T cells,Effector T cells,Endothelial cells not otherwise specified,Epide…
rno-miR-132-3p	TargetScan Human	Moderate (predicted)	TK2	thymidine kinase 2, mitochondrial	Connective Tissue Disorders,Developmental Disorder,Hereditary Disorder,Immunological Disease,Inflammatory Disease,Metabolic Disease,Skeletal and Muscular Disorders	Cytoplasm	kinase	Salvage Pathways of Pyrimidine Deoxyribonucleotides	Human,Mouse,Rat	Activated Vd1 Gamma-delta T cells,Activated Vd2 Gamma-delta T cells,Adipose,Amygdala,B lymphocytes not otherwise specified,BDCA-1+ dendritic cells,BDCA-3+ dendritic cells,Bladder,Bone marrow cells not otherwise specified,Brain,Central memory helper T cells,Cerebral Cortex,Cytotoxic T cells,Dorsal Root Ganglion,Effector memory helper T cells,Effector T cells,Epidermis,Heart,Hypothalamus,Immature m…
rno-miR-132-3p	Ingenuity Expert Findings,TargetScan Human	Experimentally Observed,High (predicted)	TLN2	talin 2	Cancer,Developmental Disorder,Gastrointestinal Disease,Hepatic System Disease,Hereditary Disorder,Organismal Injury and Abnormalities,Reproductive System Disease,Skeletal and Muscular Disorders	Nucleus	other	Actin Cytoskeleton Signaling,Crosstalk between Dendritic Cells and Natural Killer Cells,ERK/MAPK Signaling,FAK Signaling,Fcγ Receptor-mediated Phagocytosis in Macrophages and Monocytes,Integrin Signaling,Paxillin Signaling,Regulation of Cellular Mechanics by Calpain Protease	Human,Mouse,Rat	Adipose,Amygdala,Bladder,Cardiomyocytes,Cerebellum,Cerebral Cortex,Dorsal Root Ganglion,Epidermis,Heart,Hippocampus,Hypothalamus,Kidney,Large Intestine,Liver,Lung,Mammary Gland,Monocyte-derived macrophage,Olfactory Bulb,Ovary,Pituitary Gland,Placenta,Prostate Gland,Retina,Salivary Gland,Skeletal Muscle,Small Intestine,Stomach,Substantia Nigra,Testis,Uterus,HeLa,J774
rno-miR-132-3p	TargetScan Human	High (predicted)	TMEM43	transmembrane protein 43	Cancer,Cardiovascular Disease,Developmental Disorder,Hereditary Disorder,Organismal Injury and Abnormalities,Skeletal and Muscular Disorders	Nucleus	other		Human,Mouse,Rat	Adipose,Amygdala,B lymphocytes not otherwise specified,BDCA-1+ dendritic cells,BDCA-3+ dendritic cells,Bladder,Central memory cytotoxic T cells,Cytotoxic T cells,Dorsal Root Ganglion,Effector memory cytotoxic T cells,Effector memory RA+ cytotoxic T cells,Effector T cells,Epidermis,Hippocampus,Hypothalamus,Immature monocyte-derived dendritic cells,Large Intestine,Lung,Mature monocyte-derived dendr…
rno-miR-132-3p	TargetScan Human	Moderate (predicted)	TRIB1	tribbles pseudokinase 1	Cancer,Cardiovascular Disease,Connective Tissue Disorders,Developmental Disorder,Endocrine System Disorders,Gastrointestinal Disease,Hematological Disease,Hepatic System Disease,Hypersensitivity Response,Immunological Disease,Inflammatory Response,Metabolic Disease,Neurological Disease,Organismal Injury and Abnormalities,Renal and Urological Disease,Reproductive System Disease,Tumor Morphology	Cytoplasm	kinase		Human,Mouse,Rat	Activated CD56bright NK cells,Activated CD56dim NK cells,Activated Vd1 Gamma-delta T cells,Activated Vd2 Gamma-delta T cells,Adipose,Amygdala,B lymphocytes not otherwise specified,BDCA-1+ dendritic cells,BDCA-3+ dendritic cells,Bladder,Central memory helper T cells,Cerebellum,Cerebral Cortex,Cytotoxic T cells,Dorsal Root Ganglion,Effector T cells,Epidermis,Heart,Hippocampus,Immature monocyte-deri…
rno-miR-132-3p	TargetScan Human	High (predicted)	USP9X	ubiquitin specific peptidase 9, X-linked	Cancer,Developmental Disorder,Gastrointestinal Disease,Hepatic System Disease,Hereditary Disorder,Neurological Disease,Organismal Injury and Abnormalities,Reproductive System Disease	Plasma Membrane	peptidase	Clathrin-mediated Endocytosis Signaling,Protein Ubiquitination Pathway	Human,Mouse,Rat	Activated CD56bright NK cells,Activated CD56dim NK cells,Activated helper T cells,Activated Vd1 Gamma-delta T cells,Activated Vd2 Gamma-delta T cells,Adipose,Amygdala,B lymphocytes not otherwise specified,BDCA-1+ dendritic cells,BDCA-3+ dendritic cells,Bladder,Brain,CD56bright NK cells,CD56dim NK cells,Central memory cytotoxic T cells,Central memory helper T cells,Cerebellum,Cerebral Cortex,Cytot…
rno-miR-132-3p	TargetScan Human	High (predicted)	VPS41	vacuolar protein sorting 41 homolog (S. cerevisiae)	Cancer,Endocrine System Disorders,Gastrointestinal Disease,Hepatic System Disease	Cytoplasm	transporter		Human,Mouse,Rat	Adipose,Amygdala,B lymphocytes not otherwise specified,BDCA-1+ dendritic cells,BDCA-3+ dendritic cells,Bladder,Cerebellum,Cerebral Cortex,Cytotoxic T cells,Dorsal Root Ganglion,Effector T cells,Epidermis,Hippocampus,Hypothalamus,Immature monocyte-derived dendritic cells,Kidney,Large Intestine,Liver,Lung,Mature monocyte-derived dendritic cells,Monocyte-derived macrophage,Murine NKT cells,Naive hel…
rno-miR-132-3p	TargetScan Human	Moderate (predicted)	WIPF1	WAS/WASL interacting protein family, member 1	Cancer,Developmental Disorder,Gastrointestinal Disease,Hepatic System Disease,Hereditary Disorder,Hypersensitivity Response,Immunological Disease,Infectious Disease,Inflammatory Response,Organismal Injury and Abnormalities,Reproductive System Disease	Cytoplasm	other	Actin Nucleation by ARP-WASP Complex,Axonal Guidance Signaling,Cdc42 Signaling,Ephrin Receptor Signaling,Integrin Signaling,Leukocyte Extravasation Signaling,Regulation of Actin-based Motility by Rho,Signaling by Rho Family GTPases	Human,Mouse,Rat	Activated CD56bright NK cells,Activated CD56dim NK cells,Activated helper T cells,Activated Vd1 Gamma-delta T cells,Activated Vd2 Gamma-delta T cells,Adipose,Amygdala,B lymphocytes not otherwise specified,BDCA-1+ dendritic cells,BDCA-3+ dendritic cells,Bladder,Brain,CD56bright NK cells,CD56dim NK cells,Central memory cytotoxic T cells,Central memory helper T cells,Cerebellum,Cerebral Cortex,Cytot…
rno-miR-132-3p	TargetScan Human	Moderate (predicted)	WT1	Wilms tumor 1	Cancer,Cardiovascular Disease,Connective Tissue Disorders,Dermatological Diseases and Conditions,Developmental Disorder,Endocrine System Disorders,Gastrointestinal Disease,Hematological Disease,Hepatic System Disease,Hereditary Disorder,Immunological Disease,Inflammatory Disease,Inflammatory Response,Neurological Disease,Nutritional Disease,Ophthalmic Disease,Organismal Injury and Abnormalities,R…	Nucleus	transcription regulator	p53 Signaling,VDR/RXR Activation	Human,Mouse,Rat	Adipocytes,Adipose,B lymphocytes not otherwise specified,Bladder,Brain,Cerebral Cortex,Dorsal Root Ganglion,Epithelial cells not otherwise specified,Granulosa cells,Heart,Kidney,Large Intestine,Liver,Lung,Mammary Gland,Mononuclear leukocytes not otherwise specified,Murine NKT cells,Naive B cells,Other Cells,Other Epithelial cells,Other Immune cells,Other Organ Systems,Other Tissues and Primary Ce…
rno-miR-132-3p	TargetScan Human	High (predicted)	ZBTB18	zinc finger and BTB domain containing 18	Cancer,Developmental Disorder,Hereditary Disorder,Neurological Disease	Nucleus	transcription regulator		Human,Mouse,Rat	Activated CD56bright NK cells,Activated CD56dim NK cells,Activated helper T cells,Activated Vd1 Gamma-delta T cells,Activated Vd2 Gamma-delta T cells,Adipose,Amygdala,B lymphocytes not otherwise specified,BDCA-1+ dendritic cells,BDCA-3+ dendritic cells,Bladder,Brain,CD56bright NK cells,CD56dim NK cells,Central memory cytotoxic T cells,Central memory helper T cells,Cerebellum,Cerebral Cortex,Cytot…
rno-miR-132-3p	TargetScan Human	High (predicted)	ZFHX4	zinc finger homeobox 4	Cancer,Developmental Disorder,Endocrine System Disorders,Gastrointestinal Disease,Hepatic System Disease,Hereditary Disorder,Ophthalmic Disease,Organismal Injury and Abnormalities,Reproductive System Disease,Skeletal and Muscular Disorders	Extracellular Space	other		Human,Mouse,Rat	Adipose,CD56dim NK cells,Cytotoxic T cells,Dorsal Root Ganglion,Hypothalamus,Pituitary Gland,Retina,Substantia Nigra,Vd1 Gamma-delta T cells,Vd2 Gamma-delta T cells,786-0,ACHN,BT-549,CAKI-1,HCT-116,HOP-62,LOX IMVI,MDA-MB-231,NCI-ADR-RES,NCI-H226,OVCAR-3,OVCAR-8,PC-3,RXF-393,SF-268,SF-295,SF-539,SN12C,SNB-19,TK-10,U251,UO-31
rno-miR-132-3p	TargetScan Human	High (predicted)	ZFX	zinc finger protein, X-linked	Cancer,Endocrine System Disorders,Gastrointestinal Disease,Organismal Injury and Abnormalities,Reproductive System Disease	Nucleus	transcription regulator		Human,Mouse,Rat	Activated helper T cells,Adipose,Amygdala,B lymphocytes not otherwise specified,BDCA-1+ dendritic cells,BDCA-3+ dendritic cells,Bladder,Central memory cytotoxic T cells,Cerebellum,Cerebral Cortex,Cytotoxic T cells,Dorsal Root Ganglion,Effector memory cytotoxic T cells,Effector memory RA+ cytotoxic T cells,Effector T cells,Epidermis,Heart,Hippocampus,Hypothalamus,Immature monocyte-derived dendriti…
rno-miR-132-3p	TargetScan Human	High (predicted)	ZNF292	zinc finger protein 292	Cancer,Endocrine System Disorders,Gastrointestinal Disease,Hepatic System Disease,Infectious Disease,Organismal Injury and Abnormalities,Renal and Urological Disease,Reproductive System Disease	Nucleus	transcription regulator		Human,Mouse,Rat	Activated CD56bright NK cells,Activated CD56dim NK cells,Activated helper T cells,Activated Vd1 Gamma-delta T cells,Activated Vd2 Gamma-delta T cells,Adipose,Amygdala,B lymphocytes not otherwise specified,BDCA-1+ dendritic cells,BDCA-3+ dendritic cells,Bladder,CD56bright NK cells,CD56dim NK cells,Central memory cytotoxic T cells,Central memory helper T cells,Cerebellum,Cerebral Cortex,Cytotoxic T…
rno-miR-132-3p	TargetScan Human	Moderate (predicted)	ZNF451	zinc finger protein 451	Cancer,Endocrine System Disorders,Gastrointestinal Disease,Hepatic System Disease,Organismal Injury and Abnormalities,Reproductive System Disease	Nucleus	other		Human,Mouse,Rat	Activated CD56bright NK cells,Activated CD56dim NK cells,Activated helper T cells,Activated Vd1 Gamma-delta T cells,Activated Vd2 Gamma-delta T cells,Adipose,Amygdala,B lymphocytes not otherwise specified,BDCA-1+ dendritic cells,BDCA-3+ dendritic cells,Bladder,CD56bright NK cells,CD56dim NK cells,Central memory cytotoxic T cells,Central memory helper T cells,Cerebellum,Cytotoxic T cells,Dorsal Ro…
rno-miR-132-3p	TargetScan Human	High (predicted)	ZNF644	zinc finger protein 644	Cancer,Endocrine System Disorders,Gastrointestinal Disease,Hepatic System Disease,Hereditary Disorder,Ophthalmic Disease,Organismal Injury and Abnormalities,Reproductive System Disease	Nucleus	other		Human,Mouse,Rat	Activated helper T cells,Adipose,Amygdala,B lymphocytes not otherwise specified,BDCA-1+ dendritic cells,BDCA-3+ dendritic cells,Bladder,Central memory cytotoxic T cells,Cerebellum,Cerebral Cortex,Cytotoxic T cells,Dorsal Root Ganglion,Effector memory cytotoxic T cells,Effector memory RA+ cytotoxic T cells,Effector T cells,Epidermis,Heart,Hippocampus,Hypothalamus,Immature monocyte-derived dendriti…
rno-miR-140-3p	TargetScan Human	Moderate (predicted)	AASS	aminoadipate-semialdehyde synthase	Cancer,Developmental Disorder,Gastrointestinal Disease,Hematological Disease,Hepatic System Disease,Hereditary Disorder,Infectious Disease,Metabolic Disease,Organismal Injury and Abnormalities,Renal and Urological Disease,Reproductive System Disease	Cytoplasm	enzyme	Lysine Degradation II	Human,Mouse,Rat	Adipose,Amygdala,B lymphocytes not otherwise specified,Bladder,Cerebellum,Cerebral Cortex,Cytotoxic T cells,Dorsal Root Ganglion,Effector T cells,Epidermis,Heart,Hippocampus,Hypothalamus,Kidney,Large Intestine,Liver,Lung,Mammary Gland,Olfactory Bulb,Ovary,Pancreas,Pituitary Gland,Placenta,Prostate Gland,Retina,Salivary Gland,Skeletal Muscle,Small Intestine,Spleen,Stomach,Substantia Nigra,Testis,T…
rno-miR-140-3p	TargetScan Human	Moderate (predicted)	ABCD3	ATP-binding cassette, sub-family D (ALD), member 3	Cancer,Developmental Disorder,Endocrine System Disorders,Gastrointestinal Disease,Hereditary Disorder,Metabolic Disease	Cytoplasm	transporter		Human,Mouse,Rat	Activated CD56bright NK cells,Activated CD56dim NK cells,Activated helper T cells,Activated Vd1 Gamma-delta T cells,Activated Vd2 Gamma-delta T cells,Adipose,Adrenal Gland,Amygdala,Astrocytes,B lymphocytes not otherwise specified,BDCA-1+ dendritic cells,BDCA-3+ dendritic cells,Bladder,Brain,Central memory cytotoxic T cells,Central memory helper T cells,Cerebellum,Cerebral Cortex,Cytotoxic T cells…
rno-miR-140-3p	TargetScan Human	High (predicted)	ACVR2B	activin A receptor, type IIB	Cancer,Cardiovascular Disease,Connective Tissue Disorders,Dermatological Diseases and Conditions,Developmental Disorder,Gastrointestinal Disease,Hematological Disease,Hepatic System Disease,Hereditary Disorder,Metabolic Disease,Organismal Injury and Abnormalities,Renal and Urological Disease,Respiratory Disease,Skeletal and Muscular Disorders	Plasma Membrane	kinase	Epithelial Adherens Junction Signaling,Factors Promoting Cardiogenesis in Vertebrates,PPARα/RXRα Activation,TGF-β Signaling,Wnt/β-catenin Signaling	Human,Mouse,Rat	Activated CD56bright NK cells,Activated Vd1 Gamma-delta T cells,Activated Vd2 Gamma-delta T cells,Adrenal Gland,Amygdala,BDCA-3+ dendritic cells,Bladder,Brain,Central memory cytotoxic T cells,Cerebellum,Cytotoxic T cells,Effector memory cytotoxic T cells,Endothelial cells not otherwise specified,Epidermis,Epithelial cells not otherwise specified,Hippocampus,Hypothalamus,Kidney,Liver,Lung,Mammary …
rno-miR-140-3p	TargetScan Human	Moderate (predicted)	ADAM9	ADAM metallopeptidase domain 9	Cancer,Endocrine System Disorders,Gastrointestinal Disease,Hematological Disease,Hepatic System Disease,Hereditary Disorder,Immunological Disease,Infectious Disease,Inflammatory Response,Neurological Disease,Ophthalmic Disease,Organismal Injury and Abnormalities,Reproductive System Disease,Respiratory Disease,Tumor Morphology	Plasma Membrane	peptidase	Axonal Guidance Signaling	Human,Mouse,Rat	Activated helper T cells,Activated Vd1 Gamma-delta T cells,Activated Vd2 Gamma-delta T cells,Adipose,Amygdala,B lymphocytes not otherwise specified,BDCA-1+ dendritic cells,BDCA-3+ dendritic cells,Bladder,Brain,Calvaria,CD56bright NK cells,Central memory cytotoxic T cells,Cerebellum,Cerebral Cortex,Cytotoxic T cells,Dermis,Dorsal Root Ganglion,Effector memory cytotoxic T cells,Effector memory RA+ …
rno-miR-140-3p	TargetScan Human	Moderate (predicted)	ADAMTS2	ADAM metallopeptidase with thrombospondin type 1 motif, 2	Cancer,Connective Tissue Disorders,Dermatological Diseases and Conditions,Developmental Disorder,Endocrine System Disorders,Gastrointestinal Disease,Hepatic System Disease,Hereditary Disorder,Immunological Disease,Inflammatory Disease,Metabolic Disease,Organismal Injury and Abnormalities,Reproductive System Disease,Respiratory Disease,Skeletal and Muscular Disorders	Extracellular Space	peptidase	Axonal Guidance Signaling	Human,Mouse,Rat	Adipose,Amygdala,B lymphocytes not otherwise specified,Bladder,Cerebellum,Cerebral Cortex,Cytotoxic T cells,Dorsal Root Ganglion,Effector T cells,Epidermis,Fibroblasts,Heart,Hippocampus,Hypothalamus,Kidney,Large Intestine,Liver,Lung,Mammary Gland,Olfactory Bulb,Other Organ Systems,Other Tissues and Primary Cells,Ovary,Pancreas,Pituitary Gland,Placenta,Retina,Salivary Gland,Skeletal Muscle,Skin,Sp…
rno-miR-140-3p	TargetScan Human	Moderate (predicted)	AFF4	AF4/FMR2 family, member 4	Cancer,Developmental Disorder,Gastrointestinal Disease,Hepatic System Disease,Nutritional Disease,Organismal Injury and Abnormalities,Reproductive System Disease,Respiratory Disease	Nucleus	transcription regulator		Human,Mouse,Rat	Activated Vd1 Gamma-delta T cells,Activated Vd2 Gamma-delta T cells,Adipose,Amygdala,B lymphocytes not otherwise specified,BDCA-1+ dendritic cells,BDCA-3+ dendritic cells,Bladder,Brain,Central memory cytotoxic T cells,Cerebellum,Cytotoxic T cells,Dorsal Root Ganglion,Effector memory cytotoxic T cells,Effector memory RA+ cytotoxic T cells,Effector T cells,Epidermis,Heart,Hepatocytes,Hippocampus,Hy…
rno-miR-140-3p	TargetScan Human	Moderate (predicted)	AGO2	argonaute RISC catalytic component 2	Cancer,Cardiovascular Disease,Connective Tissue Disorders,Developmental Disorder,Gastrointestinal Disease,Hepatic System Disease,Infectious Disease,Inflammatory Disease,Inflammatory Response,Organismal Injury and Abnormalities,Reproductive System Disease,Respiratory Disease	Cytoplasm	translation regulator	EIF2 Signaling,Regulation of eIF4 and p70S6K Signaling	Human,Mouse,Rat	Activated CD56bright NK cells,Activated CD56dim NK cells,Activated helper T cells,Activated Vd1 Gamma-delta T cells,Activated Vd2 Gamma-delta T cells,Adipose,Amygdala,B lymphocytes not otherwise specified,BDCA-1+ dendritic cells,BDCA-3+ dendritic cells,Bladder,Central memory cytotoxic T cells,Cerebellum,Cerebral Cortex,Cytotoxic T cells,Dorsal Root Ganglion,Effector memory cytotoxic T cells,Effec…
rno-miR-140-3p	TargetScan Human	High (predicted)	AGPS	alkylglycerone phosphate synthase	Cancer,Connective Tissue Disorders,Developmental Disorder,Hereditary Disorder,Metabolic Disease,Neurological Disease,Organismal Injury and Abnormalities,Reproductive System Disease,Skeletal and Muscular Disorders	Cytoplasm	enzyme		Human,Mouse,Rat	Activated CD56bright NK cells,Activated CD56dim NK cells,Activated helper T cells,Activated Vd1 Gamma-delta T cells,Activated Vd2 Gamma-delta T cells,Adipose,Amygdala,B lymphocytes not otherwise specified,BDCA-1+ dendritic cells,BDCA-3+ dendritic cells,Bladder,CD56dim NK cells,Central memory cytotoxic T cells,Central memory helper T cells,Cerebellum,Cerebral Cortex,Cytotoxic T cells,Dorsal Root G…
rno-miR-140-3p	TargetScan Human	Moderate (predicted)	APLP2	amyloid beta (A4) precursor-like protein 2	Cancer,Connective Tissue Disorders,Developmental Disorder,Gastrointestinal Disease,Immunological Disease,Inflammatory Disease,Metabolic Disease,Neurological Disease,Organismal Injury and Abnormalities,Psychological Disorders,Respiratory Disease,Skeletal and Muscular Disorders	Cytoplasm	other		Human,Mouse,Rat	Adipose,Amygdala,B lymphocytes not otherwise specified,Bladder,Brain,Cerebellum,Cerebral Cortex,Cortical neurons,Cytotoxic T cells,Dorsal Root Ganglion,Effector T cells,Epidermis,Heart,Hippocampus,Hypothalamus,Kidney,Large Intestine,Liver,Lung,Mammary Gland,Memory B cells,Naive B cells,Neurons not otherwise specified,Olfactory Bulb,Ovary,Pancreas,Peripheral blood lymphocytes,Pituitary Gland,Place…
rno-miR-140-3p	TargetScan Human	Moderate (predicted)	AQP4	aquaporin 4	Auditory Disease,Cancer,Cardiovascular Disease,Connective Tissue Disorders,Developmental Disorder,Endocrine System Disorders,Gastrointestinal Disease,Hematological Disease,Hereditary Disorder,Immunological Disease,Infectious Disease,Inflammatory Disease,Inflammatory Response,Neurological Disease,Ophthalmic Disease,Organismal Injury and Abnormalities,Psychological Disorders,Renal and Urological Di…	Plasma Membrane	transporter	eNOS Signaling	Human,Mouse,Rat	Adipocytes,Adipose,Amygdala,Astrocytes,B lymphocytes not otherwise specified,Brain,Cardiomyocytes,Cerebellum,Cerebral Cortex,Cerebral Ventricles,Cytotoxic T cells,Dorsal Root Ganglion,Effector T cells,Epidermis,Epithelial cells not otherwise specified,Heart,Hippocampus,Hypothalamus,Kidney,Large Intestine,Liver,Lung,Mammary Gland,Olfactory Bulb,Oocytes,Other Cells,Other Nervous System,Other Organ …
rno-miR-140-3p	TargetScan Human	Moderate (predicted)	ARSA	arylsulfatase A	Auditory Disease,Developmental Disorder,Hereditary Disorder,Inflammatory Response,Metabolic Disease,Neurological Disease,Organismal Injury and Abnormalities,Psychological Disorders	Cytoplasm	enzyme		Human,Mouse,Rat	Adipose,Amygdala,B lymphocytes not otherwise specified,Bladder,Cerebellum,Cerebral Cortex,Cytotoxic T cells,Dorsal Root Ganglion,Effector T cells,Epidermis,Fibroblasts,Heart,Hippocampus,Hypothalamus,Kidney,Large Intestine,Liver,Lung,Monocyte-derived macrophage,Olfactory Bulb,Other Cells,Other Organ Systems,Other Tissues and Primary Cells,Ovary,Pituitary Gland,Placenta,Retina,Substantia Nigra,Test…
rno-miR-140-3p	TargetScan Human	Moderate (predicted)	ASIC1	acid-sensing (proton-gated) ion channel 1	Cancer,Cardiovascular Disease,Endocrine System Disorders,Gastrointestinal Disease,Metabolic Disease,Neurological Disease,Organismal Injury and Abnormalities,Renal and Urological Disease	Plasma Membrane	ion channel	Aldosterone Signaling in Epithelial Cells,Gustation Pathway,Insulin Receptor Signaling	Human,Mouse,Rat	Adipose,Amygdala,Astrocytes,B lymphocytes not otherwise specified,Brain,Brainstem,Cerebellum,Cerebral Cortex,Cerebral Ventricles,Choroid Plexus,Cytotoxic T cells,Dendritic cells not otherwise specified,Dorsal Root Ganglion,Effector T cells,Epidermis,Granule cells,Gray Matter,Hippocampus,Hypothalamus,Large Intestine,Liver,Lung,Mammary Gland,Medulla Oblongata,Nervous System not otherwise specified,…
rno-miR-140-3p	TargetScan Human	Moderate (predicted)	ATF2	activating transcription factor 2	Cancer,Connective Tissue Disorders,Dermatological Diseases and Conditions,Developmental Disorder,Gastrointestinal Disease,Hematological Disease,Hepatic System Disease,Inflammatory Response,Neurological Disease,Organismal Injury and Abnormalities,Psychological Disorders,Reproductive System Disease,Respiratory Disease,Skeletal and Muscular Disorders,Tumor Morphology	Nucleus	transcription regulator	4-1BB Signaling in T Lymphocytes,Activation of IRF by Cytosolic Pattern Recognition Receptors,ATM Signaling,B Cell Receptor Signaling,BMP signaling pathway,Calcium Signaling,cAMP-mediated signaling,Cardiac Hypertrophy Signaling,Cardiomyocyte Differentiation via BMP Receptors,Cdc42 Signaling,Cholecystokinin/Gastrin-mediated Signaling,Circadian Rhythm Signaling,Corticotropin Releasing Hormone Signa…	Human,Mouse,Rat	Activated CD56bright NK cells,Activated helper T cells,Activated Vd1 Gamma-delta T cells,Activated Vd2 Gamma-delta T cells,Adipose,Amygdala,B lymphocytes not otherwise specified,BDCA-1+ dendritic cells,BDCA-3+ dendritic cells,Bladder,Brain,Brainstem,Central memory cytotoxic T cells,Central memory helper T cells,Cerebellum,Cerebral Cortex,Cytotoxic T cells,Dorsal Root Ganglion,Effector memory cyto…
rno-miR-140-3p	TargetScan Human	Moderate (predicted)	ATP8A1	ATPase, aminophospholipid transporter (APLT), class I, type 8A, member 1	Cancer,Connective Tissue Disorders,Endocrine System Disorders,Gastrointestinal Disease,Hepatic System Disease,Immunological Disease,Inflammatory Disease,Metabolic Disease,Neurological Disease,Psychological Disorders,Skeletal and Muscular Disorders	Cytoplasm	transporter		Human,Mouse,Rat	Activated Vd1 Gamma-delta T cells,Adipose,Amygdala,B lymphocytes not otherwise specified,CD56bright NK cells,Central memory cytotoxic T cells,Cerebellum,Cerebral Cortex,Dorsal Root Ganglion,Effector memory cytotoxic T cells,Effector memory RA+ cytotoxic T cells,Effector T cells,Heart,Hippocampus,Hypothalamus,Large Intestine,Lung,Memory B cells,Natural T-regulatory cells,Olfactory Bulb,Ovary,Pitui…
rno-miR-140-3p	TargetScan Human	Moderate (predicted)	ATR	ATR serine/threonine kinase	Cancer,Cardiovascular Disease,Connective Tissue Disorders,Dental Disease,Dermatological Diseases and Conditions,Developmental Disorder,Gastrointestinal Disease,Hematological Disease,Hepatic System Disease,Hereditary Disorder,Immunological Disease,Infectious Disease,Inflammatory Response,Neurological Disease,Organismal Injury and Abnormalities,Skeletal and Muscular Disorders	Nucleus	kinase	Aryl Hydrocarbon Receptor Signaling,Cell Cycle: G1/S Checkpoint Regulation,Cell Cycle: G2/M DNA Damage Checkpoint Regulation,Cyclins and Cell Cycle Regulation,DNA damage-induced 14-3-3σ Signaling,GADD45 Signaling,Hereditary Breast Cancer Signaling,Molecular Mechanisms of Cancer,p53 Signaling,Role of BRCA1 in DNA Damage Response,Role of CHK Proteins in Cell Cycle Checkpoint Control,UVC-Induced MAP…	Human,Mouse,Rat	Activated Vd1 Gamma-delta T cells,Activated Vd2 Gamma-delta T cells,Adipose,Amygdala,B lymphocytes not otherwise specified,BDCA-1+ dendritic cells,BDCA-3+ dendritic cells,Bladder,Central memory cytotoxic T cells,Central memory helper T cells,Cerebellum,Cerebral Cortex,Cytotoxic T cells,Dorsal Root Ganglion,Effector memory cytotoxic T cells,Effector memory helper T cells,Effector memory RA+ cytoto…
rno-miR-140-3p	TargetScan Human	Moderate (predicted)	BACE1	beta-site APP-cleaving enzyme 1	Cancer,Developmental Disorder,Gastrointestinal Disease,Hepatic System Disease,Hereditary Disorder,Metabolic Disease,Neurological Disease,Nutritional Disease,Ophthalmic Disease,Organismal Injury and Abnormalities,Psychological Disorders	Cytoplasm	peptidase	Amyloid Processing,Mitochondrial Dysfunction	Human,Mouse,Rat	Adipose,Amygdala,B lymphocytes not otherwise specified,Bladder,Brain,Brainstem,Caudate Nucleus,Cerebellum,Cerebral Cortex,Corpus Callosum,Cortical neurons,Cytotoxic T cells,Dorsal Root Ganglion,Epidermis,Granule Cell Layer,Heart,Hippocampus,Hypothalamus,Immune cells not otherwise specified,Kidney,Large Intestine,Lens,Liver,Lung,Mammary Gland,Medulla Oblongata,Neurons not otherwise specified,Olfac…
rno-miR-140-3p	TargetScan Human	Moderate (predicted)	BAG1	BCL2-associated athanogene	Cancer,Developmental Disorder,Gastrointestinal Disease,Hepatic System Disease,Neurological Disease,Organismal Injury and Abnormalities,Renal and Urological Disease,Reproductive System Disease,Tumor Morphology	Cytoplasm	other	Glucocorticoid Receptor Signaling,Protein Ubiquitination Pathway	Human,Mouse,Rat	Activated CD56bright NK cells,Activated CD56dim NK cells,Activated helper T cells,Activated Vd1 Gamma-delta T cells,Activated Vd2 Gamma-delta T cells,Adipose,Amygdala,B lymphocytes not otherwise specified,BDCA-1+ dendritic cells,BDCA-3+ dendritic cells,Bladder,Brain,CD56bright NK cells,CD56dim NK cells,Central memory cytotoxic T cells,Central memory helper T cells,Cerebellum,Cerebral Cortex,Cytot…
rno-miR-140-3p	TargetScan Human	Moderate (predicted)	BNC1	basonuclin 1	Cancer,Endocrine System Disorders,Gastrointestinal Disease,Hepatic System Disease,Organismal Injury and Abnormalities,Reproductive System Disease	Nucleus	transcription regulator		Human,Mouse,Rat	Amygdala,B lymphocytes not otherwise specified,Bladder,Cerebellum,Cerebral Cortex,Cytotoxic T cells,Dorsal Root Ganglion,Epidermis,Heart,Hippocampus,Kidney,Large Intestine,Liver,Lung,Mammary Gland,Olfactory Bulb,Ovary,Pancreas,Pituitary Gland,Placenta,Plasmacytoid dendritic cells,Retina,Skeletal Muscle,Small Intestine,Spleen,Stomach,Testis,Thymus,Uterus,RAW 264.7
rno-miR-140-3p	TargetScan Human	Moderate (predicted)	C1orf52	chromosome 1 open reading frame 52	Cancer,Endocrine System Disorders,Gastrointestinal Disease	Other	other		Human,Mouse,Rat	Activated helper T cells,Adipose,Amygdala,B lymphocytes not otherwise specified,BDCA-1+ dendritic cells,BDCA-3+ dendritic cells,Bladder,Central memory cytotoxic T cells,Cerebellum,Cerebral Cortex,Cytotoxic T cells,Dorsal Root Ganglion,Effector memory cytotoxic T cells,Effector memory RA+ cytotoxic T cells,Effector T cells,Epidermis,Heart,Hippocampus,Hypothalamus,Immature monocyte-derived dendriti…
rno-miR-140-3p	TargetScan Human	Moderate (predicted)	CA8	carbonic anhydrase VIII	Cancer,Developmental Disorder,Hereditary Disorder,Neurological Disease,Organismal Injury and Abnormalities,Reproductive System Disease	Cytoplasm	enzyme		Human,Mouse,Rat	Adipose,Amygdala,B lymphocytes not otherwise specified,Brain,Cerebellum,Cytotoxic T cells,Dorsal Root Ganglion,Epidermis,Heart,Hippocampus,Hypothalamus,Kidney,Large Intestine,Liver,Lung,Olfactory Bulb,Other Nervous System,Other Neurons,Other Organ Systems,Ovary,Pancreas,Pituitary Gland,Placenta,Plasmacytoid dendritic cells,Retina,Salivary Gland,Skeletal Muscle,Small Intestine,Spleen,Substantia Ni…
rno-miR-140-3p	TargetScan Human	Moderate (predicted)	CALCR	calcitonin receptor	Cancer,Connective Tissue Disorders,Developmental Disorder,Endocrine System Disorders,Gastrointestinal Disease,Hematological Disease,Immunological Disease,Metabolic Disease,Organismal Injury and Abnormalities,Skeletal and Muscular Disorders	Plasma Membrane	G-protein coupled receptor	G-Protein Coupled Receptor Signaling,Gαq Signaling,Role of Osteoblasts, Osteoclasts and Chondrocytes in Rheumatoid Arthritis	Human,Mouse,Rat	Adipocytes,Adipose,Brain,Calvaria,Cartilage Tissue,Caudate Nucleus,Chondrocytes,Hypothalamus,Kidney,Lung,Mesenchymal stem cells,Nervous System not otherwise specified,Oocytes,Other Cells,Other Nervous System,Other Neurons,Other Organ Systems,Ovary,Pancreas,Pituitary Gland,Skeletal Muscle,Striatum,Breast Cancer Cell Lines not otherwise specified,MCF7,Other Cell Line,Other Leukemia Cell Lines,Other…
rno-miR-140-3p	TargetScan Human	Moderate (predicted)	CASR	calcium-sensing receptor	Cancer,Cardiovascular Disease,Connective Tissue Disorders,Developmental Disorder,Endocrine System Disorders,Gastrointestinal Disease,Hematological Disease,Hepatic System Disease,Hereditary Disorder,Inflammatory Disease,Inflammatory Response,Metabolic Disease,Neurological Disease,Nutritional Disease,Organismal Injury and Abnormalities,Renal and Urological Disease,Reproductive System Disease,Skelet…	Plasma Membrane	G-protein coupled receptor	GPCR-Mediated Nutrient Sensing in Enteroendocrine Cells,VDR/RXR Activation	Human,Mouse,Rat	Adipose,Beta islet cells,Cartilage Tissue,Chondrocytes,Dermis,Epidermis,Epithelial cells not otherwise specified,Heart,Hepatocytes,Keratinocytes,Kidney,Large Intestine,Liver,Mammary Gland,Microglia,Monocytes not otherwise specified,Neurons not otherwise specified,Other Cells,Other Nervous System,Other Organ Systems,Other Tissues and Primary Cells,Pancreas,Peripheral blood lymphocytes,Pituitary Gl…
rno-miR-140-3p	TargetScan Human	Moderate (predicted)	CD274	CD274 molecule	Auditory Disease,Cancer,Cardiovascular Disease,Connective Tissue Disorders,Endocrine System Disorders,Gastrointestinal Disease,Hematological Disease,Hepatic System Disease,Immunological Disease,Infectious Disease,Inflammatory Disease,Inflammatory Response,Metabolic Disease,Neurological Disease,Nutritional Disease,Organismal Injury and Abnormalities,Reproductive System Disease,Respiratory Disease,…	Plasma Membrane	enzyme		Human,Mouse,Rat	Adipose,B lymphocytes not otherwise specified,Bone marrow-derived dendritic cells,Cardiomyocytes,Central memory cytotoxic T cells,Cytotoxic T cells,Dendritic cells not otherwise specified,Dermis,Dorsal Root Ganglion,Effector memory cytotoxic T cells,Effector memory RA+ cytotoxic T cells,Effector T cells,Endothelial cells not otherwise specified,Epidermis,Epithelial cells not otherwise specified,H…
rno-miR-140-3p	TargetScan Human	High (predicted)	CMPK2	cytidine monophosphate (UMP-CMP) kinase 2, mitochondrial	Cancer,Endocrine System Disorders,Gastrointestinal Disease,Organismal Injury and Abnormalities,Reproductive System Disease	Cytoplasm	kinase	Pyrimidine Deoxyribonucleotides De Novo Biosynthesis I,Pyrimidine Ribonucleotides De Novo Biosynthesis,Pyrimidine Ribonucleotides Interconversion,Salvage Pathways of Pyrimidine Ribonucleotides	Human,Mouse,Rat	Activated helper T cells,Adipose,Amygdala,B lymphocytes not otherwise specified,BDCA-1+ dendritic cells,BDCA-3+ dendritic cells,Bladder,Cerebellum,Cerebral Cortex,Cytotoxic T cells,Dorsal Root Ganglion,Effector memory cytotoxic T cells,Effector memory RA+ cytotoxic T cells,Effector T cells,Epidermis,Heart,Hippocampus,Hypothalamus,Immature monocyte-derived dendritic cells,Kidney,Large Intestine,Li…
rno-miR-140-3p	TargetScan Human	Moderate (predicted)	CRY1	cryptochrome circadian clock 1	Cancer,Connective Tissue Disorders,Endocrine System Disorders,Gastrointestinal Disease,Hepatic System Disease,Inflammatory Disease,Inflammatory Response,Metabolic Disease,Nutritional Disease,Skeletal and Muscular Disorders	Nucleus	enzyme	Circadian Rhythm Signaling	Human,Mouse,Rat	Activated CD56bright NK cells,Activated CD56dim NK cells,Activated helper T cells,Activated Vd1 Gamma-delta T cells,Activated Vd2 Gamma-delta T cells,BDCA-1+ dendritic cells,BDCA-3+ dendritic cells,Brain,CD56bright NK cells,CD56dim NK cells,Central memory cytotoxic T cells,Central memory helper T cells,Cytotoxic T cells,Effector memory cytotoxic T cells,Effector memory helper T cells,Effector mem…
rno-miR-140-3p	TargetScan Human	Moderate (predicted)	CTBP2	C-terminal binding protein 2	Cancer,Endocrine System Disorders,Gastrointestinal Disease,Hematological Disease,Immunological Disease,Infectious Disease,Organismal Injury and Abnormalities,Reproductive System Disease,Tumor Morphology	Nucleus	transcription regulator	Adipogenesis pathway,Chronic Myeloid Leukemia Signaling,Estrogen Receptor Signaling	Human,Mouse,Rat	Activated CD56bright NK cells,Activated CD56dim NK cells,Activated Vd1 Gamma-delta T cells,Activated Vd2 Gamma-delta T cells,Adipose,Amygdala,BDCA-1+ dendritic cells,BDCA-3+ dendritic cells,Bladder,CD56bright NK cells,CD56dim NK cells,Central memory helper T cells,Cerebellum,Cerebral Cortex,Cytotoxic T cells,Dorsal Root Ganglion,Effector memory RA+ cytotoxic T cells,Epidermis,Heart,Hippocampus,Hy…
rno-miR-140-3p	TargetScan Human	Moderate (predicted)	CTSD	cathepsin D	Cancer,Cardiovascular Disease,Developmental Disorder,Endocrine System Disorders,Gastrointestinal Disease,Hematological Disease,Hepatic System Disease,Hereditary Disorder,Immunological Disease,Inflammatory Disease,Inflammatory Response,Metabolic Disease,Neurological Disease,Ophthalmic Disease,Organismal Injury and Abnormalities,Psychological Disorders,Reproductive System Disease,Respiratory Disease	Cytoplasm	peptidase	Aryl Hydrocarbon Receptor Signaling,Ceramide Signaling,Huntington's Disease Signaling,Thyroid Hormone Biosynthesis	Human,Mouse,Rat	Activated CD56bright NK cells,Activated Vd1 Gamma-delta T cells,Activated Vd2 Gamma-delta T cells,Adipose,Amygdala,Astrocytes,B lymphocytes not otherwise specified,BDCA-1+ dendritic cells,Bladder,Brain,CD56dim NK cells,Cerebellum,Cerebral Cortex,Cytotoxic T cells,Dorsal Root Ganglion,Effector T cells,Epidermis,Fibroblasts,Heart,Hippocampus,Hypothalamus,Immature monocyte-derived dendritic cells,Ki…
rno-miR-140-3p	TargetScan Human	Moderate (predicted)	DAB2	Dab, mitogen-responsive phosphoprotein, homolog 2 (Drosophila)	Cancer,Cardiovascular Disease,Endocrine System Disorders,Gastrointestinal Disease,Inflammatory Response,Organismal Injury and Abnormalities,Reproductive System Disease	Plasma Membrane	other	Clathrin-mediated Endocytosis Signaling	Human,Mouse,Rat	Activated CD56dim NK cells,Activated Vd2 Gamma-delta T cells,Adipose,Amygdala,BDCA-1+ dendritic cells,BDCA-3+ dendritic cells,Bladder,Cerebellum,Cerebral Cortex,Cytotoxic T cells,Dorsal Root Ganglion,Epidermis,Heart,Hippocampus,Hypothalamus,Immature monocyte-derived dendritic cells,Kidney,Large Intestine,Liver,Lung,Mammary Gland,Mature monocyte-derived dendritic cells,Monocyte-derived macrophage,…
rno-miR-140-3p	TargetScan Human	Moderate (predicted)	DACH1	dachshund family transcription factor 1	Cancer,Dermatological Diseases and Conditions,Endocrine System Disorders,Gastrointestinal Disease,Hematological Disease,Hepatic System Disease,Neurological Disease,Organismal Injury and Abnormalities,Psychological Disorders,Reproductive System Disease,Respiratory Disease	Nucleus	transcription regulator		Human,Mouse,Rat	Adipose,Amygdala,B lymphocytes not otherwise specified,BDCA-1+ dendritic cells,BDCA-3+ dendritic cells,Bladder,Brain,Cerebellum,Cerebral Cortex,Cytotoxic T cells,Dorsal Root Ganglion,Effector T cells,Epidermis,Granule cells,Heart,Hippocampus,Hypothalamus,Kidney,Large Intestine,Liver,Lung,Mammary Gland,Naive helper T cells,Neurons not otherwise specified,Olfactory Bulb,Ovary,Pancreas,Pituitary Gla…
rno-miR-140-3p	TargetScan Human	Moderate (predicted)	DDC	dopa decarboxylase (aromatic L-amino acid decarboxylase)	Cancer,Cardiovascular Disease,Dermatological Diseases and Conditions,Developmental Disorder,Gastrointestinal Disease,Hematological Disease,Hepatic System Disease,Hereditary Disorder,Immunological Disease,Metabolic Disease,Neurological Disease,Ophthalmic Disease,Organismal Injury and Abnormalities,Psychological Disorders,Skeletal and Muscular Disorders	Cytoplasm	enzyme	Catecholamine Biosynthesis,Dopamine Receptor Signaling,Serotonin and Melatonin Biosynthesis,Serotonin Receptor Signaling,Tryptophan Degradation X (Mammalian, via Tryptamine)	Human,Mouse,Rat	Adipose,Amygdala,Astrocytes,Bladder,Brain,Brainstem,Cerebellum,Cerebral Cortex,Cytotoxic T cells,Dorsal Root Ganglion,Effector T cells,Epidermis,Heart,Hippocampus,Hypothalamus,Kidney,Large Intestine,Liver,Lung,Mammary Gland,Murine NKT cells,Neurons not otherwise specified,Nucleus Accumbens,Olfactory Bulb,Other Cells,Other Nervous System,Other Neurons,Ovary,Pituitary Gland,Placenta,Retina,Skeletal…
rno-miR-140-3p	TargetScan Human	Moderate (predicted)	DDHD1	DDHD domain containing 1	Cancer,Endocrine System Disorders,Gastrointestinal Disease,Hereditary Disorder,Neurological Disease,Organismal Injury and Abnormalities,Reproductive System Disease	Extracellular Space	enzyme		Human,Mouse,Rat	Activated helper T cells,Adipose,Amygdala,B lymphocytes not otherwise specified,BDCA-1+ dendritic cells,BDCA-3+ dendritic cells,Central memory cytotoxic T cells,Cerebellum,Cerebral Cortex,Cytotoxic T cells,Dorsal Root Ganglion,Effector memory cytotoxic T cells,Effector memory RA+ cytotoxic T cells,Effector T cells,Epidermis,Heart,Hippocampus,Hypothalamus,Immature monocyte-derived dendritic cells,…
rno-miR-140-3p	TargetScan Human	High (predicted)	DDX39B	DEAD (Asp-Glu-Ala-Asp) box polypeptide 39B	Cancer,Connective Tissue Disorders,Endocrine System Disorders,Gastrointestinal Disease,Immunological Disease,Inflammatory Disease,Metabolic Disease,Skeletal and Muscular Disorders	Nucleus	enzyme		Human,Mouse,Rat	Activated CD56bright NK cells,Activated CD56dim NK cells,Activated Vd1 Gamma-delta T cells,Activated Vd2 Gamma-delta T cells,Adipose,Amygdala,B lymphocytes not otherwise specified,BDCA-1+ dendritic cells,BDCA-3+ dendritic cells,Bladder,Central memory cytotoxic T cells,Central memory helper T cells,Cerebellum,Cerebral Cortex,Cytotoxic T cells,Dorsal Root Ganglion,Effector memory cytotoxic T cells,…
rno-miR-140-3p	TargetScan Human	Moderate (predicted)	DENND6A	DENN/MADD domain containing 6A	Cancer,Endocrine System Disorders,Gastrointestinal Disease	Cytoplasm	other		Human,Mouse,Rat	Activated helper T cells,Adipose,Amygdala,B lymphocytes not otherwise specified,BDCA-1+ dendritic cells,BDCA-3+ dendritic cells,Bladder,Central memory cytotoxic T cells,Cerebellum,Cerebral Cortex,Cytotoxic T cells,Dorsal Root Ganglion,Effector memory cytotoxic T cells,Effector memory RA+ cytotoxic T cells,Effector T cells,Epidermis,Heart,Hippocampus,Hypothalamus,Immature monocyte-derived dendriti…
rno-miR-140-3p	TargetScan Human	Moderate (predicted)	DHX9	DEAH (Asp-Glu-Ala-His) box helicase 9	Cancer,Endocrine System Disorders,Gastrointestinal Disease,Infectious Disease,Metabolic Disease,Neurological Disease,Organismal Injury and Abnormalities,Psychological Disorders,Reproductive System Disease,Respiratory Disease	Nucleus	enzyme		Human,Mouse,Rat	Adipose,Amygdala,B lymphocytes not otherwise specified,Bladder,Cerebellum,Cerebral Cortex,Cytotoxic T cells,Dorsal Root Ganglion,Effector T cells,Epidermis,Heart,Hippocampus,Hypothalamus,Kidney,Large Intestine,Liver,Lung,Mammary Gland,Memory B cells,Murine NKT cells,Naive B cells,Olfactory Bulb,Ovary,Pancreas,Pituitary Gland,Placenta,Prostate Gland,Retina,Salivary Gland,Skeletal Muscle,Small Inte…
rno-miR-140-3p	TargetScan Human	Moderate (predicted)	DIDO1	death inducer-obliterator 1	Cancer,Endocrine System Disorders,Gastrointestinal Disease,Hematological Disease,Hepatic System Disease,Immunological Disease,Inflammatory Response,Organismal Injury and Abnormalities,Renal and Urological Disease	Nucleus	other		Human,Mouse,Rat	Activated CD56bright NK cells,Activated CD56dim NK cells,Activated helper T cells,Activated Vd1 Gamma-delta T cells,Activated Vd2 Gamma-delta T cells,Adipose,BDCA-1+ dendritic cells,BDCA-3+ dendritic cells,CD56dim NK cells,Central memory cytotoxic T cells,Central memory helper T cells,Cytotoxic T cells,Effector memory cytotoxic T cells,Effector memory helper T cells,Effector memory RA+ cytotoxic …
rno-miR-140-3p	TargetScan Human	Moderate (predicted)	DLG3	discs, large homolog 3 (Drosophila)	Cancer,Developmental Disorder,Gastrointestinal Disease,Hepatic System Disease,Hereditary Disorder,Neurological Disease,Organismal Injury and Abnormalities,Psychological Disorders,Reproductive System Disease	Plasma Membrane	kinase	HIPPO signaling	Human,Mouse,Rat	Activated CD56bright NK cells,Activated CD56dim NK cells,Activated helper T cells,Activated Vd1 Gamma-delta T cells,Activated Vd2 Gamma-delta T cells,Adipose,Amygdala,B lymphocytes not otherwise specified,BDCA-3+ dendritic cells,Bladder,Brain,CD56bright NK cells,CD56dim NK cells,Cells not otherwise specified,Central memory cytotoxic T cells,Central memory helper T cells,Cerebellum,Cerebral Cortex…
rno-miR-140-3p	TargetScan Human	Moderate (predicted)	EDNRA	endothelin receptor type A	Cancer,Cardiovascular Disease,Connective Tissue Disorders,Dental Disease,Dermatological Diseases and Conditions,Developmental Disorder,Endocrine System Disorders,Gastrointestinal Disease,Hematological Disease,Hepatic System Disease,Hereditary Disorder,Immunological Disease,Infectious Disease,Inflammatory Disease,Inflammatory Response,Metabolic Disease,Neurological Disease,Organismal Injury and Ab…	Plasma Membrane	transmembrane receptor	Endothelin-1 Signaling,Hepatic Fibrosis / Hepatic Stellate Cell Activation,Ovarian Cancer Signaling	Human,Mouse,Rat	Adipocytes,Adipose,Adrenal Gland,Brain,Crypt,Dermis,Endothelial cells not otherwise specified,Heart,Kidney,Large Intestine,Lung,Macrophages not otherwise specified,Melanocytes,Neurons not otherwise specified,Other Cells,Other Endothelial cells,Other Nervous System,Other Organ Systems,Other Tissues and Primary Cells,Ovary,Pancreas,PBMCs,Pituitary Gland,Placenta,Skin,Smooth Muscle,Smooth muscle cel…
rno-miR-140-3p	TargetScan Human	Moderate (predicted)	EFEMP1	EGF containing fibulin-like extracellular matrix protein 1	Cancer,Connective Tissue Disorders,Dermatological Diseases and Conditions,Developmental Disorder,Gastrointestinal Disease,Hepatic System Disease,Hereditary Disorder,Metabolic Disease,Neurological Disease,Ophthalmic Disease,Organismal Injury and Abnormalities,Renal and Urological Disease,Reproductive System Disease,Skeletal and Muscular Disorders,Tumor Morphology	Extracellular Space	enzyme		Human,Mouse,Rat	Adipose,Bladder,Brain,Cerebellum,Dorsal Root Ganglion,Endothelial cells not otherwise specified,Epidermis,Heart,HUVEC cells,Kidney,Large Intestine,Lung,Olfactory Bulb,Other Cells,Other Organ Systems,Other Tissues and Primary Cells,Ovary,Pituitary Gland,Prostate Gland,Retina,Skeletal Muscle,Small Intestine,Spleen,Stomach,Uterus,A498,BT-549,DU-145,EKVX,H460,HOP-62,HOP-92,HS 578T,K-562,MCF7,MDA-MB-2…
rno-miR-140-3p	TargetScan Human	Moderate (predicted)	FARP1	FERM, RhoGEF (ARHGEF) and pleckstrin domain protein 1 (chondrocyte-derived)	Cancer,Cardiovascular Disease,Endocrine System Disorders,Gastrointestinal Disease,Hepatic System Disease,Inflammatory Disease,Organismal Injury and Abnormalities,Reproductive System Disease	Plasma Membrane	other		Human,Mouse,Rat	Amygdala,Bladder,Central memory cytotoxic T cells,Cerebellum,Cerebral Cortex,Dorsal Root Ganglion,Epidermis,Hippocampus,Hypothalamus,Immature monocyte-derived dendritic cells,Kidney,Large Intestine,Liver,Lung,Mature monocyte-derived dendritic cells,Monocyte-derived macrophage,Naive helper T cells,Olfactory Bulb,Other Cells,Ovary,Pituitary Gland,Placenta,Prostate Gland,Salivary Gland,Stomach,Subst…
rno-miR-140-3p	TargetScan Human	Moderate (predicted)	FBXO33	F-box protein 33	Cancer,Endocrine System Disorders,Gastrointestinal Disease,Neurological Disease	Other	other		Human,Mouse,Rat	Activated helper T cells,Adipose,Amygdala,B lymphocytes not otherwise specified,BDCA-1+ dendritic cells,BDCA-3+ dendritic cells,Bladder,Central memory cytotoxic T cells,Cerebellum,Cerebral Cortex,Cytotoxic T cells,Dorsal Root Ganglion,Effector memory cytotoxic T cells,Effector memory RA+ cytotoxic T cells,Effector T cells,Epidermis,Heart,Hippocampus,Hypothalamus,Immature monocyte-derived dendriti…
rno-miR-140-3p	TargetScan Human	Moderate (predicted)	FBXO45	F-box protein 45	Cancer,Connective Tissue Disorders,Developmental Disorder,Gastrointestinal Disease,Neurological Disease,Respiratory Disease,Skeletal and Muscular Disorders	Plasma Membrane	other		Human,Mouse,Rat	Activated helper T cells,Adipose,Amygdala,B lymphocytes not otherwise specified,BDCA-1+ dendritic cells,BDCA-3+ dendritic cells,Bladder,Central memory cytotoxic T cells,Cerebellum,Cerebral Cortex,Cytotoxic T cells,Dorsal Root Ganglion,Effector memory cytotoxic T cells,Effector memory RA+ cytotoxic T cells,Effector T cells,Epidermis,Heart,Hippocampus,Hypothalamus,Immature monocyte-derived dendriti…
rno-miR-140-3p	TargetScan Human	Moderate (predicted)	FKBP1A	FK506 binding protein 1A, 12kDa	Cancer,Cardiovascular Disease,Connective Tissue Disorders,Dermatological Diseases and Conditions,Developmental Disorder,Endocrine System Disorders,Gastrointestinal Disease,Hematological Disease,Hepatic System Disease,Hereditary Disorder,Immunological Disease,Infectious Disease,Inflammatory Disease,Inflammatory Response,Metabolic Disease,Neurological Disease,Ophthalmic Disease,Organismal Injury an…	Cytoplasm	enzyme	mTOR Signaling	Human,Mouse,Rat	Activated CD56bright NK cells,Activated CD56dim NK cells,Activated helper T cells,Activated Vd1 Gamma-delta T cells,Activated Vd2 Gamma-delta T cells,Adipose,Amygdala,B lymphocytes not otherwise specified,BDCA-1+ dendritic cells,BDCA-3+ dendritic cells,Bladder,Brain,Cardiomyocytes,CD56bright NK cells,CD56dim NK cells,Central memory cytotoxic T cells,Central memory helper T cells,Cerebellum,Cerebr…
rno-miR-140-3p	TargetScan Human	Moderate (predicted)	FRAS1	Fraser extracellular matrix complex subunit 1	Cancer,Cardiovascular Disease,Dermatological Diseases and Conditions,Developmental Disorder,Endocrine System Disorders,Gastrointestinal Disease,Hepatic System Disease,Hereditary Disorder,Ophthalmic Disease,Organismal Injury and Abnormalities,Renal and Urological Disease	Extracellular Space	other		Human,Mouse,Rat	Adipose,Amygdala,B lymphocytes not otherwise specified,Bladder,Cerebellum,Cerebral Cortex,Cytotoxic T cells,Dorsal Root Ganglion,Effector T cells,Epidermis,Heart,Hippocampus,Hypothalamus,Kidney,Large Intestine,Lung,Olfactory Bulb,Ovary,Pancreas,Pituitary Gland,Placenta,Retina,Salivary Gland,Skeletal Muscle,Small Intestine,Spleen,Stomach,Substantia Nigra,Thymus,Uterus,Vd2 Gamma-delta T cells,A549-…
rno-miR-140-3p	TargetScan Human	Moderate (predicted)	GDI1	GDP dissociation inhibitor 1	Cancer,Developmental Disorder,Hereditary Disorder,Neurological Disease	Cytoplasm	other	RhoGDI Signaling	Human,Mouse,Rat	Activated CD56bright NK cells,Activated CD56dim NK cells,Activated helper T cells,Activated Vd1 Gamma-delta T cells,Activated Vd2 Gamma-delta T cells,Adipose,Amygdala,B lymphocytes not otherwise specified,BDCA-1+ dendritic cells,BDCA-3+ dendritic cells,Bladder,Brain,Caudate Nucleus,CD56bright NK cells,CD56dim NK cells,Central memory cytotoxic T cells,Central memory helper T cells,Cerebellum,Cereb…
rno-miR-140-3p	TargetScan Human	Moderate (predicted)	GJB2	gap junction protein, beta 2, 26kDa	Auditory Disease,Cancer,Dermatological Diseases and Conditions,Developmental Disorder,Endocrine System Disorders,Gastrointestinal Disease,Hepatic System Disease,Hereditary Disorder,Inflammatory Response,Neurological Disease,Organismal Injury and Abnormalities,Renal and Urological Disease,Reproductive System Disease,Skeletal and Muscular Disorders	Plasma Membrane	transporter		Human,Mouse,Rat	Astrocytes,Brain,Cerebral Cortex,Dermis,Embryonic stem cells,Epidermis,Epithelial cells not otherwise specified,Esophagus,Hepatocytes,Immature monocyte-derived dendritic cells,Keratinocytes,Kidney,Liver,Lung,Mammary Gland,Mature monocyte-derived dendritic cells,Monocyte-derived macrophage,Other Nervous System,Other Organ Systems,Ovary,Pancreas,Pituitary Gland,Placenta,Prostate Gland,Retina,Saliva…
rno-miR-140-3p	TargetScan Human	Moderate (predicted)	GLG1	golgi glycoprotein 1	Cancer,Cardiovascular Disease,Endocrine System Disorders,Gastrointestinal Disease,Hepatic System Disease,Inflammatory Disease,Organismal Injury and Abnormalities,Skeletal and Muscular Disorders	Cytoplasm	other	Agranulocyte Adhesion and Diapedesis,Atherosclerosis Signaling,Granulocyte Adhesion and Diapedesis	Human,Mouse,Rat	Activated helper T cells,Activated Vd1 Gamma-delta T cells,Activated Vd2 Gamma-delta T cells,Adipose,Amygdala,B lymphocytes not otherwise specified,BDCA-1+ dendritic cells,BDCA-3+ dendritic cells,Bladder,Central memory cytotoxic T cells,Cerebellum,Cerebral Cortex,Cytotoxic T cells,Dorsal Root Ganglion,Effector memory cytotoxic T cells,Effector memory helper T cells,Effector memory RA+ cytotoxic T…
rno-miR-140-3p	TargetScan Human	Moderate (predicted)	GNRHR	gonadotropin-releasing hormone receptor	Cancer,Dermatological Diseases and Conditions,Developmental Disorder,Endocrine System Disorders,Hereditary Disorder,Immunological Disease,Inflammatory Disease,Metabolic Disease,Neurological Disease,Ophthalmic Disease,Organismal Injury and Abnormalities,Psychological Disorders,Reproductive System Disease,Respiratory Disease	Plasma Membrane	G-protein coupled receptor	GNRH Signaling	Human,Mouse,Rat	Activated Vd2 Gamma-delta T cells,Brain,Cerebral Cortex,Granulosa cells,Hippocampus,HUVEC cells,Hypothalamus,Neurons not otherwise specified,Other Cells,Other Nervous System,Other Neurons,Other Tissues and Primary Cells,Ovary,Pituitary Gland,Testis,Tissues and Primary Cells not otherwise specified,Uterus,Breast Cancer Cell Lines not otherwise specified,DU-145,J774,MCF7,MDA-MB-231,Other Cell Line,…
rno-miR-140-3p	TargetScan Human	Moderate (predicted)	GOLGB1	golgin B1	Cancer,Endocrine System Disorders,Gastrointestinal Disease,Hepatic System Disease,Organismal Injury and Abnormalities,Reproductive System Disease	Cytoplasm	other		Human,Mouse,Rat	Activated CD56bright NK cells,Activated helper T cells,Activated Vd1 Gamma-delta T cells,Activated Vd2 Gamma-delta T cells,BDCA-1+ dendritic cells,BDCA-3+ dendritic cells,Central memory cytotoxic T cells,Central memory helper T cells,Cytotoxic T cells,Effector memory cytotoxic T cells,Effector memory helper T cells,Effector memory RA+ cytotoxic T cells,Hypothalamus,Immature monocyte-derived dendr…
rno-miR-140-3p	TargetScan Human	Moderate (predicted)	GPNMB	glycoprotein (transmembrane) nmb	Cancer,Endocrine System Disorders,Gastrointestinal Disease,Immunological Disease,Metabolic Disease,Neurological Disease,Ophthalmic Disease,Organismal Injury and Abnormalities,Renal and Urological Disease	Plasma Membrane	enzyme		Human,Mouse,Rat	Activated helper T cells,Adipose,Amygdala,B lymphocytes not otherwise specified,Bladder,Bone marrow cells not otherwise specified,Bone marrow-derived dendritic cells,Bone marrow-derived macrophages,CD56bright NK cells,Cerebellum,Cerebral Cortex,Cytotoxic T cells,Dorsal Root Ganglion,Effector memory helper T cells,Effector T cells,Epidermis,Heart,Hippocampus,Hypothalamus,Immature monocyte-derived …
rno-miR-140-3p	TargetScan Human	Moderate (predicted)	GRAMD2	GRAM domain containing 2	Cancer,Endocrine System Disorders,Gastrointestinal Disease	Other	other		Human,Mouse,Rat	Activated helper T cells,Adipose,Amygdala,B lymphocytes not otherwise specified,BDCA-3+ dendritic cells,Bladder,Cerebellum,Cerebral Cortex,Cytotoxic T cells,Dorsal Root Ganglion,Effector T cells,Epidermis,Heart,Hippocampus,Hypothalamus,Kidney,Large Intestine,Liver,Lung,Mammary Gland,Naive helper T cells,Olfactory Bulb,Ovary,Pituitary Gland,Placenta,Plasmacytoid dendritic cells,Retina,Salivary Gla…
rno-miR-140-3p	TargetScan Human	Moderate (predicted)	GRB10	growth factor receptor-bound protein 10	Cancer,Connective Tissue Disorders,Developmental Disorder,Gastrointestinal Disease,Hepatic System Disease,Immunological Disease,Inflammatory Disease,Organismal Injury and Abnormalities,Reproductive System Disease,Respiratory Disease,Skeletal and Muscular Disorders	Cytoplasm	other	IGF-1 Signaling,Insulin Receptor Signaling	Human,Mouse,Rat	Activated helper T cells,Activated Vd1 Gamma-delta T cells,Activated Vd2 Gamma-delta T cells,Adipose,Amygdala,Brain,CD56bright NK cells,Central memory helper T cells,Cytotoxic T cells,Dorsal Root Ganglion,Epidermis,Heart,Hypothalamus,Immature monocyte-derived dendritic cells,Intraepithelial T lymphocytes,Kidney,Large Intestine,Liver,Lung,Mature monocyte-derived dendritic cells,Memory B cells,Mono…
rno-miR-140-3p	TargetScan Human	High (predicted)	GXYLT1	glucoside xylosyltransferase 1	Cancer,Cardiovascular Disease,Endocrine System Disorders,Gastrointestinal Disease,Hepatic System Disease,Organismal Injury and Abnormalities,Renal and Urological Disease,Reproductive System Disease	Cytoplasm	other		Human,Mouse,Rat	Adipose,Amygdala,B lymphocytes not otherwise specified,BDCA-1+ dendritic cells,BDCA-3+ dendritic cells,Bladder,Central memory cytotoxic T cells,Cerebellum,Cerebral Cortex,Cytotoxic T cells,Dorsal Root Ganglion,Effector memory cytotoxic T cells,Effector memory RA+ cytotoxic T cells,Effector T cells,Epidermis,Heart,Hippocampus,Hypothalamus,Immature monocyte-derived dendritic cells,Kidney,Large Inte…
rno-miR-140-3p	TargetScan Human	Moderate (predicted)	HEY1	hes-related family bHLH transcription factor with YRPW motif 1	Cancer,Cardiovascular Disease,Developmental Disorder,Hematological Disease,Immunological Disease,Organismal Injury and Abnormalities	Nucleus	transcription regulator	Notch Signaling	Human,Mouse,Rat	Adipose,Adrenal Gland,Amygdala,Brain,Cerebellum,Cerebral Cortex,Dorsal Root Ganglion,Granule cells,Heart,Hippocampus,HUVEC cells,Kidney,Liver,Lung,Other Organ Systems,Other T lymphocytes,Ovary,Pituitary Gland,Retina,Skeletal Muscle,Spleen,Substantia Nigra,Thymus,786-0,CAKI-1,COLO205,H460,HCT-15,HOP-62,HOP-92,HS 578T,Jurkat,K-562,KM-12,LOX IMVI,M14,MALME-3M,MDA-MB-231,MDA-MB-435,MDA-N,NCI-ADR-RES,…
rno-miR-140-3p	TargetScan Human	Moderate (predicted)	HPS4	Hermansky-Pudlak syndrome 4	Cancer,Dermatological Diseases and Conditions,Developmental Disorder,Endocrine System Disorders,Gastrointestinal Disease,Hereditary Disorder,Metabolic Disease,Ophthalmic Disease,Organismal Injury and Abnormalities	Cytoplasm	other		Human,Mouse,Rat	Activated helper T cells,Activated Vd1 Gamma-delta T cells,Adipose,Amygdala,B lymphocytes not otherwise specified,BDCA-1+ dendritic cells,BDCA-3+ dendritic cells,Central memory cytotoxic T cells,Central memory helper T cells,Cerebellum,Cerebral Cortex,Cytotoxic T cells,Dorsal Root Ganglion,Effector memory cytotoxic T cells,Effector memory helper T cells,Effector memory RA+ cytotoxic T cells,Effec…
rno-miR-140-3p	TargetScan Human	Moderate (predicted)	HTR1F	5-hydroxytryptamine (serotonin) receptor 1F, G protein-coupled	Cancer,Endocrine System Disorders,Gastrointestinal Disease,Hepatic System Disease,Neurological Disease,Nutritional Disease,Organismal Injury and Abnormalities,Reproductive System Disease	Plasma Membrane	G-protein coupled receptor	cAMP-mediated signaling,G-Protein Coupled Receptor Signaling,Gαi Signaling	Human,Mouse,Rat	Brain,Brainstem,Cerebellum,Cerebral Cortex,Hippocampus,Hypothalamus,Other Nervous System,Other Neurons,Other Tissues and Primary Cells,Pituitary Gland,Striatum,Thalamus,Uterus
rno-miR-140-3p	TargetScan Human	Moderate (predicted)	HTR5A	5-hydroxytryptamine (serotonin) receptor 5A, G protein-coupled	Cancer,Developmental Disorder,Gastrointestinal Disease,Hereditary Disorder,Neurological Disease,Psychological Disorders,Respiratory Disease	Plasma Membrane	G-protein coupled receptor	cAMP-mediated signaling,G-Protein Coupled Receptor Signaling,Gαs Signaling,Serotonin Receptor Signaling	Human,Mouse,Rat	Adipose,Brain,Brainstem,Cerebellum,Cerebral Cortex,Cytotoxic T cells,Effector T cells,Hippocampus,Hypothalamus,Medulla Oblongata,Murine NKT cells,Other Nervous System,Other Neurons,Pituitary Gland,Striatum,Thalamus
rno-miR-140-3p	TargetScan Human	Moderate (predicted)	HYOU1	hypoxia up-regulated 1	Cancer,Cardiovascular Disease,Endocrine System Disorders,Gastrointestinal Disease,Inflammatory Response,Metabolic Disease,Neurological Disease,Organismal Injury and Abnormalities,Respiratory Disease,Tumor Morphology	Cytoplasm	other		Human,Mouse,Rat	B lymphocytes not otherwise specified,Kidney,Memory B cells,Naive B cells,Ovary,Pituitary Gland,786-0,A498,A549-ATCC,ACHN,BT-549,CAKI-1,CCRF-CEM,COLO205,DU-145,EKVX,H460,HCC-2998,HCT-116,HCT-15,HL-60,HOP-62,HOP-92,HS 578T,HT29,IGROV1,J774,K-562,KM-12,LOX IMVI,M14,MALME-3M,MCF7,MDA-MB-231,MDA-MB-435,MDA-N,MOLT-4,NCI-ADR-RES,NCI-H226,NCI-H23,NCI-H332M,NCI-H522,OVCAR-3,OVCAR-4,OVCAR-5,OVCAR-8,PC-3,R…
rno-miR-140-3p	TargetScan Human	High (predicted)	IDS	iduronate 2-sulfatase	Cancer,Connective Tissue Disorders,Dermatological Diseases and Conditions,Developmental Disorder,Hereditary Disorder,Inflammatory Disease,Inflammatory Response,Metabolic Disease,Neurological Disease,Skeletal and Muscular Disorders	Cytoplasm	enzyme	Dermatan Sulfate Degradation (Metazoa)	Human,Mouse,Rat	Activated helper T cells,Activated Vd1 Gamma-delta T cells,Activated Vd2 Gamma-delta T cells,Adipose,Amygdala,B lymphocytes not otherwise specified,BDCA-1+ dendritic cells,BDCA-3+ dendritic cells,Bladder,CD56dim NK cells,Central memory cytotoxic T cells,Central memory helper T cells,Cerebellum,Cerebral Cortex,Cytotoxic T cells,Dorsal Root Ganglion,Effector memory cytotoxic T cells,Effector memory…
rno-miR-140-3p	TargetScan Human	Moderate (predicted)	IFNAR1	interferon (alpha, beta and omega) receptor 1	Antimicrobial Response,Cancer,Cardiovascular Disease,Connective Tissue Disorders,Dermatological Diseases and Conditions,Developmental Disorder,Endocrine System Disorders,Gastrointestinal Disease,Hematological Disease,Hepatic System Disease,Hypersensitivity Response,Immunological Disease,Infectious Disease,Inflammatory Disease,Inflammatory Response,Metabolic Disease,Neurological Disease,Ophthalmic…	Plasma Membrane	transmembrane receptor	Activation of IRF by Cytosolic Pattern Recognition Receptors,Dendritic Cell Maturation,Hepatic Fibrosis / Hepatic Stellate Cell Activation,Interferon Signaling,Retinoic acid Mediated Apoptosis Signaling,Role of JAK1, JAK2 and TYK2 in Interferon Signaling,Role of Lipids/Lipid Rafts in the Pathogenesis of Influenza,Role of PI3K/AKT Signaling in the Pathogenesis of Influenza,Role of Wnt/GSK-3β Signa…	Human,Mouse,Rat	Adipose,Amygdala,B lymphocytes not otherwise specified,BDCA-1+ dendritic cells,BDCA-3+ dendritic cells,Bladder,Bone marrow-derived macrophages,Brain,Cartilage Tissue,Cerebellum,Chondrocytes,Cytotoxic T cells,Dorsal Root Ganglion,Effector T cells,Epidermis,Fibroblasts,Heart,Hematopoietic progenitor cells,Hippocampus,Hypothalamus,Immature monocyte-derived dendritic cells,Kidney,Large Intestine,Live…
rno-miR-140-3p	TargetScan Human	Moderate (predicted)	IFT57	intraflagellar transport 57	Cancer,Cardiovascular Disease,Connective Tissue Disorders,Developmental Disorder,Gastrointestinal Disease,Hepatic System Disease,Neurological Disease,Ophthalmic Disease,Organismal Injury and Abnormalities,Reproductive System Disease,Skeletal and Muscular Disorders	Cytoplasm	other	Huntington's Disease Signaling	Human,Mouse,Rat	Brain,Brainstem,Cerebellum,Cerebral Cortex,Cytotoxic T cells,Effector T cells,Heart,Kidney,Large Intestine,Liver,Lung,Medulla Oblongata,Pituitary Gland,Placenta,Putamen,Skeletal Muscle,Small Intestine,Spinal Cord,Spleen,Striatum,Testis,Thymus,786-0,A549-ATCC,ACHN,CAKI-1,COLO205,DU-145,H460,HCT-116,HCT-15,HL-60,HOP-62,HOP-92,HS 578T,J774,LOX IMVI,M14,MDA-MB-231,MDA-MB-435,MDA-N,MOLT-4,NCI-ADR-RES,…
rno-miR-140-3p	TargetScan Human	Moderate (predicted)	IGFBP1	insulin-like growth factor binding protein 1	Cancer,Connective Tissue Disorders,Dermatological Diseases and Conditions,Developmental Disorder,Endocrine System Disorders,Gastrointestinal Disease,Hematological Disease,Hepatic System Disease,Hereditary Disorder,Inflammatory Disease,Inflammatory Response,Metabolic Disease,Neurological Disease,Nutritional Disease,Organismal Injury and Abnormalities,Renal and Urological Disease,Reproductive Syste…	Extracellular Space	other	Estrogen Receptor Signaling,IGF-1 Signaling,PXR/RXR Activation,VDR/RXR Activation	Human,Mouse,Rat	Cerebellum,Dorsal Root Ganglion,Epidermis,Epithelial cells not otherwise specified,Hepatocytes,Hippocampus,Hypothalamus,Kidney,Large Intestine,Liver,Mammary Gland,Olfactory Bulb,Osteoblasts,Other Tissues and Primary Cells,Ovary,Pituitary Gland,Placenta,Prostate Gland,Retina,Salivary Gland,Skeletal Muscle,Small Intestine,Stomach,Stromal cells,Testis,Thymus,Uterus,A549-ATCC,CAKI-1,COLO205,Hep3B,Hep…
rno-miR-140-3p	TargetScan Human	Moderate (predicted)	IKBKB	inhibitor of kappa light polypeptide gene enhancer in B-cells, kinase beta	Antimicrobial Response,Cancer,Cardiovascular Disease,Connective Tissue Disorders,Dermatological Diseases and Conditions,Developmental Disorder,Endocrine System Disorders,Gastrointestinal Disease,Hematological Disease,Hepatic System Disease,Hereditary Disorder,Hypersensitivity Response,Immunological Disease,Infectious Disease,Inflammatory Disease,Inflammatory Response,Metabolic Disease,Neurologica…	Cytoplasm	kinase	4-1BB Signaling in T Lymphocytes,Activation of IRF by Cytosolic Pattern Recognition Receptors,Acute Phase Response Signaling,Angiopoietin Signaling,Antioxidant Action of Vitamin C,Apoptosis Signaling,April Mediated Signaling,B Cell Activating Factor Signaling,B Cell Receptor Signaling,CD27 Signaling in Lymphocytes,CD28 Signaling in T Helper Cells,CD40 Signaling,Chronic Myeloid Leukemia Signaling,…	Human,Mouse,Rat	Adipose,Amygdala,B lymphocytes not otherwise specified,Bladder,Brain,Cerebellum,Cerebral Cortex,Cytotoxic T cells,Dorsal Root Ganglion,Effector T cells,Epidermis,Fibroblasts,Heart,Hippocampus,Hypothalamus,Kidney,Large Intestine,Liver,Lung,Mammary Gland,Memory B cells,Murine NKT cells,Naive B cells,Olfactory Bulb,Other Tissues and Primary Cells,Ovary,Pancreas,Pituitary Gland,Placenta,Prostate Glan…
rno-miR-140-3p	TargetScan Human	Moderate (predicted)	IREB2	iron-responsive element binding protein 2	Cancer,Connective Tissue Disorders,Developmental Disorder,Endocrine System Disorders,Gastrointestinal Disease,Hematological Disease,Hepatic System Disease,Metabolic Disease,Neurological Disease,Organismal Injury and Abnormalities,Psychological Disorders,Reproductive System Disease,Skeletal and Muscular Disorders	Cytoplasm	translation regulator		Human,Mouse,Rat	Activated helper T cells,Adipose,Amygdala,B lymphocytes not otherwise specified,BDCA-1+ dendritic cells,BDCA-3+ dendritic cells,Bladder,Brain,Central memory cytotoxic T cells,Cerebellum,Cerebral Cortex,Cytotoxic T cells,Dorsal Root Ganglion,Effector memory cytotoxic T cells,Effector memory RA+ cytotoxic T cells,Effector T cells,Epidermis,Granule Cell Layer,Heart,Hippocampus,Hypothalamus,Immature …
rno-miR-140-3p	TargetScan Human	Moderate (predicted)	ISCU	iron-sulfur cluster assembly enzyme	Cancer,Endocrine System Disorders,Hereditary Disorder,Skeletal and Muscular Disorders	Cytoplasm	other		Human,Mouse,Rat	Adipose,Amygdala,B lymphocytes not otherwise specified,Bladder,Cerebellum,Cerebral Cortex,Cytotoxic T cells,Dorsal Root Ganglion,Effector T cells,Epidermis,Fibroblasts,Heart,Hematopoietic progenitor cells,Hippocampus,Hypothalamus,Kidney,Large Intestine,Liver,Lung,Mammary Gland,Memory B cells,Naive B cells,Olfactory Bulb,Other Cells,Other Organ Systems,Ovary,Pancreas,Pituitary Gland,Placenta,Prost…
rno-miR-140-3p	TargetScan Human	Moderate (predicted)	KLF5	Kruppel-like factor 5 (intestinal)	Cancer,Cardiovascular Disease,Developmental Disorder,Endocrine System Disorders,Gastrointestinal Disease,Metabolic Disease,Neurological Disease,Nutritional Disease,Organismal Injury and Abnormalities,Psychological Disorders,Renal and Urological Disease,Reproductive System Disease,Respiratory Disease,Skeletal and Muscular Disorders	Nucleus	transcription regulator	Adipogenesis pathway	Human,Mouse,Rat	Activated helper T cells,Activated Vd1 Gamma-delta T cells,Activated Vd2 Gamma-delta T cells,Adipose,Amygdala,B lymphocytes not otherwise specified,BDCA-3+ dendritic cells,Beta islet cells,Bladder,Brain,CD56bright NK cells,Central memory cytotoxic T cells,Cerebellum,Cerebral Cortex,Cytotoxic T cells,Dermis,Dorsal Root Ganglion,Effector memory helper T cells,Effector memory RA+ cytotoxic T cells,E…
rno-miR-140-3p	TargetScan Human	High (predicted)	KLHL9	kelch-like family member 9	Cancer,Endocrine System Disorders,Gastrointestinal Disease	Cytoplasm	other		Human,Mouse,Rat	Activated CD56bright NK cells,Activated CD56dim NK cells,Activated helper T cells,Activated Vd1 Gamma-delta T cells,Activated Vd2 Gamma-delta T cells,Adipose,Amygdala,B lymphocytes not otherwise specified,BDCA-1+ dendritic cells,BDCA-3+ dendritic cells,Bladder,CD56bright NK cells,CD56dim NK cells,Central memory cytotoxic T cells,Central memory helper T cells,Cerebellum,Cerebral Cortex,Cytotoxic T…
rno-miR-140-3p	TargetScan Human	High (predicted)	LAMP2	lysosomal-associated membrane protein 2	Cardiovascular Disease,Connective Tissue Disorders,Dental Disease,Developmental Disorder,Gastrointestinal Disease,Hepatic System Disease,Hereditary Disorder,Infectious Disease,Inflammatory Response,Neurological Disease,Organismal Injury and Abnormalities,Psychological Disorders,Skeletal and Muscular Disorders	Plasma Membrane	enzyme		Human,Mouse,Rat	Activated CD56bright NK cells,Activated CD56dim NK cells,Activated helper T cells,Activated Vd1 Gamma-delta T cells,Activated Vd2 Gamma-delta T cells,Adipose,Amygdala,B lymphocytes not otherwise specified,BDCA-1+ dendritic cells,BDCA-3+ dendritic cells,Bladder,Central memory cytotoxic T cells,Central memory helper T cells,Cerebellum,Cerebral Cortex,Cytotoxic T cells,Dorsal Root Ganglion,Effector …
rno-miR-140-3p	TargetScan Human	Moderate (predicted)	LDLRAD4	low density lipoprotein receptor class A domain containing 4	Cancer,Developmental Disorder,Neurological Disease,Organismal Injury and Abnormalities,Reproductive System Disease,Respiratory Disease	Cytoplasm	other		Human,Mouse,Rat	Adipose,B lymphocytes not otherwise specified,BDCA-3+ dendritic cells,Cytotoxic T cells,Dorsal Root Ganglion,Immature monocyte-derived dendritic cells,Kidney,Large Intestine,Liver,Naive helper T cells,Olfactory Bulb,Ovary,Pituitary Gland,Plasmacytoid dendritic cells,Salivary Gland,Small Intestine,Spleen,Thymus,Uterus,A549-ATCC,ACHN,CCRF-CEM,COLO205,EKVX,HCC-2998,HL-60,HOP-62,HOP-92,HS 578T,LOX IM…
rno-miR-140-3p	TargetScan Human	Moderate (predicted)	LMBR1	limb development membrane protein 1	Connective Tissue Disorders,Developmental Disorder,Hereditary Disorder,Skeletal and Muscular Disorders	Plasma Membrane	transmembrane receptor		Human,Mouse,Rat	Amygdala,Bladder,Cerebellum,Cytotoxic T cells,Dorsal Root Ganglion,Hippocampus,Hypothalamus,Immature monocyte-derived dendritic cells,Lung,Mature monocyte-derived dendritic cells,Monocyte-derived macrophage,Olfactory Bulb,Ovary,Pituitary Gland,Retina,Skeletal Muscle,Substantia Nigra,Testis,A498,ACHN,CAKI-1,DU-145,H460,HCT-116,HCT-15,HeLa,HOP-92,HS 578T,J774,K-562,KM-12,MALME-3M,MCF7,NCI-H23,NCI-H…
rno-miR-140-3p	TargetScan Human	Moderate (predicted)	MAP2K1	mitogen-activated protein kinase kinase 1	Cancer,Cardiovascular Disease,Connective Tissue Disorders,Dermatological Diseases and Conditions,Developmental Disorder,Gastrointestinal Disease,Hematological Disease,Hepatic System Disease,Hereditary Disorder,Immunological Disease,Infectious Disease,Inflammatory Response,Neurological Disease,Organismal Injury and Abnormalities,Renal and Urological Disease,Reproductive System Disease,Respiratory …	Cytoplasm	kinase	14-3-3-mediated Signaling,4-1BB Signaling in T Lymphocytes,Actin Cytoskeleton Signaling,Acute Myeloid Leukemia Signaling,Acute Phase Response Signaling,Aldosterone Signaling in Epithelial Cells,Antiproliferative Role of Somatostatin Receptor 2,Apoptosis Signaling,Axonal Guidance Signaling,B Cell Receptor Signaling,Bladder Cancer Signaling,BMP signaling pathway,Breast Cancer Regulation by Stathmin…	Human,Mouse,Rat	Activated CD56bright NK cells,Activated CD56dim NK cells,Activated helper T cells,Activated Vd1 Gamma-delta T cells,Activated Vd2 Gamma-delta T cells,Adipose,Amygdala,B lymphocytes not otherwise specified,BDCA-1+ dendritic cells,BDCA-3+ dendritic cells,Bladder,Brain,CD56bright NK cells,CD56dim NK cells,Central memory cytotoxic T cells,Central memory helper T cells,Cerebellum,Cerebral Cortex,Cytot…
rno-miR-140-3p	TargetScan Human	Moderate (predicted)	MAPK1	mitogen-activated protein kinase 1	Cancer,Cardiovascular Disease,Developmental Disorder,Hypersensitivity Response,Infectious Disease,Inflammatory Response,Neurological Disease,Organismal Injury and Abnormalities,Renal and Urological Disease,Skeletal and Muscular Disorders,Tumor Morphology	Cytoplasm	kinase	14-3-3-mediated Signaling,4-1BB Signaling in T Lymphocytes,Actin Cytoskeleton Signaling,Acute Myeloid Leukemia Signaling,Acute Phase Response Signaling,Agrin Interactions at Neuromuscular Junction,Aldosterone Signaling in Epithelial Cells,AMPK Signaling,Amyloid Processing,Androgen Signaling,Antioxidant Action of Vitamin C,Antiproliferative Role of Somatostatin Receptor 2,Antiproliferative Role of…	Human,Mouse,Rat	Activated CD56bright NK cells,Activated CD56dim NK cells,Activated helper T cells,Activated Vd1 Gamma-delta T cells,Activated Vd2 Gamma-delta T cells,Adipose,Amygdala,Astrocytes,B lymphocytes not otherwise specified,BDCA-1+ dendritic cells,BDCA-3+ dendritic cells,Bladder,Brain,Cartilage Tissue,CD56bright NK cells,CD56dim NK cells,Central memory cytotoxic T cells,Central memory helper T cells,Cere…
rno-miR-140-3p	TargetScan Human	Moderate (predicted)	MARCH6	membrane-associated ring finger (C3HC4) 6, E3 ubiquitin protein ligase	Cancer,Cardiovascular Disease,Endocrine System Disorders,Gastrointestinal Disease,Hepatic System Disease,Metabolic Disease,Organismal Injury and Abnormalities	Cytoplasm	enzyme		Human,Mouse,Rat	Activated helper T cells,Activated Vd1 Gamma-delta T cells,Activated Vd2 Gamma-delta T cells,Adipose,Amygdala,B lymphocytes not otherwise specified,Bladder,Brain,Central memory cytotoxic T cells,Central memory helper T cells,Cerebellum,Cerebral Cortex,Cerebral Ventricles,Cytotoxic T cells,Dorsal Root Ganglion,Effector memory cytotoxic T cells,Effector memory helper T cells,Effector memory RA+ cyt…
rno-miR-140-3p	TargetScan Human	Moderate (predicted)	MARK3	MAP/microtubule affinity-regulating kinase 3	Cancer,Endocrine System Disorders,Gastrointestinal Disease,Hematological Disease,Hepatic System Disease,Metabolic Disease,Nutritional Disease,Organismal Injury and Abnormalities,Reproductive System Disease	Cytoplasm	kinase		Human,Mouse,Rat	Adipose,Amygdala,B lymphocytes not otherwise specified,Bladder,Brain,Cerebellum,Cerebral Cortex,Cytotoxic T cells,Dorsal Root Ganglion,Effector T cells,Epidermis,Heart,Hippocampus,Hypothalamus,Kidney,Large Intestine,Liver,Lung,Mammary Gland,Memory B cells,Murine NKT cells,Naive B cells,Olfactory Bulb,Other Organ Systems,Ovary,Pancreas,Pituitary Gland,Placenta,Prostate Gland,Retina,Salivary Gland,…
rno-miR-140-3p	TargetScan Human	Moderate (predicted)	MAX	MYC associated factor X	Cancer,Endocrine System Disorders,Hematological Disease,Hereditary Disorder,Immunological Disease,Neurological Disease,Organismal Injury and Abnormalities,Reproductive System Disease	Nucleus	transcription regulator	Cell Cycle: G1/S Checkpoint Regulation,Molecular Mechanisms of Cancer,p38 MAPK Signaling,Polyamine Regulation in Colon Cancer,Small Cell Lung Cancer Signaling	Human,Mouse,Rat	Activated Vd1 Gamma-delta T cells,Activated Vd2 Gamma-delta T cells,Adipose,Amygdala,B lymphocytes not otherwise specified,BDCA-1+ dendritic cells,BDCA-3+ dendritic cells,Bladder,Brain,CD56dim NK cells,Central memory cytotoxic T cells,Cerebellum,Cerebral Cortex,Cytotoxic T cells,Dorsal Root Ganglion,Effector memory cytotoxic T cells,Effector memory RA+ cytotoxic T cells,Effector T cells,Endotheli…
rno-miR-140-3p	TargetScan Human	Moderate (predicted)	MCM6	minichromosome maintenance complex component 6	Cancer,Developmental Disorder,Gastrointestinal Disease,Hepatic System Disease,Hereditary Disorder,Metabolic Disease,Neurological Disease,Organismal Injury and Abnormalities,Reproductive System Disease	Nucleus	enzyme	Cell Cycle Control of Chromosomal Replication	Human,Mouse,Rat	Activated CD56bright NK cells,Activated CD56dim NK cells,Activated helper T cells,Activated Vd1 Gamma-delta T cells,Activated Vd2 Gamma-delta T cells,Adipose,Amygdala,B lymphocytes not otherwise specified,BDCA-1+ dendritic cells,BDCA-3+ dendritic cells,Bladder,Central memory cytotoxic T cells,Central memory helper T cells,Cerebellum,Cerebral Cortex,Crypt,Cytotoxic T cells,Dorsal Root Ganglion,Eff…
rno-miR-140-3p	TargetScan Human	Moderate (predicted)	MDN1	MDN1, midasin homolog (yeast)	Cancer,Endocrine System Disorders,Gastrointestinal Disease,Hepatic System Disease,Infectious Disease,Organismal Injury and Abnormalities,Reproductive System Disease	Nucleus	other		Human,Mouse,Rat	Activated CD56bright NK cells,Activated CD56dim NK cells,Activated helper T cells,Activated Vd1 Gamma-delta T cells,Activated Vd2 Gamma-delta T cells,Adipose,Amygdala,B lymphocytes not otherwise specified,BDCA-1+ dendritic cells,BDCA-3+ dendritic cells,Bladder,Central memory cytotoxic T cells,Central memory helper T cells,Cerebellum,Cerebral Cortex,Cytotoxic T cells,Dorsal Root Ganglion,Effector …
rno-miR-140-3p	TargetScan Human	Moderate (predicted)	MED13	mediator complex subunit 13	Cancer,Developmental Disorder,Gastrointestinal Disease,Hepatic System Disease,Nutritional Disease,Organismal Injury and Abnormalities,Renal and Urological Disease,Skeletal and Muscular Disorders	Nucleus	transcription regulator	Estrogen Receptor Signaling	Human,Mouse,Rat	Activated CD56bright NK cells,Activated CD56dim NK cells,Activated helper T cells,Activated Vd1 Gamma-delta T cells,Activated Vd2 Gamma-delta T cells,Adipose,Adrenal Gland,Amygdala,B lymphocytes not otherwise specified,BDCA-1+ dendritic cells,BDCA-3+ dendritic cells,Bladder,Brain,CD56bright NK cells,Central memory cytotoxic T cells,Central memory helper T cells,Cerebral Cortex,Cytotoxic T cells,D…
rno-miR-140-3p	TargetScan Human	Moderate (predicted)	METAP2	methionyl aminopeptidase 2	Cancer,Dermatological Diseases and Conditions,Developmental Disorder,Organismal Injury and Abnormalities,Reproductive System Disease	Cytoplasm	peptidase		Human,Mouse,Rat	Activated CD56dim NK cells,Activated helper T cells,Activated Vd1 Gamma-delta T cells,Activated Vd2 Gamma-delta T cells,Adipose,Amygdala,B lymphocytes not otherwise specified,BDCA-1+ dendritic cells,BDCA-3+ dendritic cells,Bladder,Cardiomyocytes,Central memory cytotoxic T cells,Cerebellum,Cerebral Cortex,Crypt,Cytotoxic T cells,Dorsal Root Ganglion,Effector memory cytotoxic T cells,Effector memor…
rno-miR-140-3p	TargetScan Human	Moderate (predicted)	METTL14	methyltransferase like 14	Cancer,Endocrine System Disorders,Gastrointestinal Disease,Organismal Injury and Abnormalities,Reproductive System Disease	Nucleus	enzyme		Human,Mouse,Rat	Activated helper T cells,Adipose,Amygdala,B lymphocytes not otherwise specified,BDCA-1+ dendritic cells,BDCA-3+ dendritic cells,Bladder,Central memory cytotoxic T cells,Cerebellum,Cerebral Cortex,Cytotoxic T cells,Dorsal Root Ganglion,Effector memory cytotoxic T cells,Effector memory RA+ cytotoxic T cells,Effector T cells,Epidermis,Heart,Hippocampus,Hypothalamus,Immature monocyte-derived dendriti…
rno-miR-140-3p	TargetScan Human	Moderate (predicted)	MLYCD	malonyl-CoA decarboxylase	Cancer,Cardiovascular Disease,Developmental Disorder,Endocrine System Disorders,Gastrointestinal Disease,Hepatic System Disease,Hereditary Disorder,Metabolic Disease,Neurological Disease,Organismal Injury and Abnormalities,Renal and Urological Disease,Skeletal and Muscular Disorders	Cytoplasm	enzyme	AMPK Signaling	Human,Mouse,Rat	Activated CD56bright NK cells,Activated CD56dim NK cells,Activated Vd1 Gamma-delta T cells,Activated Vd2 Gamma-delta T cells,Adipose,Amygdala,B lymphocytes not otherwise specified,BDCA-1+ dendritic cells,BDCA-3+ dendritic cells,Bladder,Brain,Cerebellum,Cerebral Cortex,Cytotoxic T cells,Dorsal Root Ganglion,Effector T cells,Epidermis,Heart,Hippocampus,Hypothalamus,Immature monocyte-derived dendrit…
rno-miR-140-3p	TargetScan Human	Moderate (predicted)	MMP24	matrix metallopeptidase 24 (membrane-inserted)	Cancer,Endocrine System Disorders,Gastrointestinal Disease,Hypersensitivity Response,Inflammatory Response,Neurological Disease,Organismal Injury and Abnormalities,Renal and Urological Disease,Reproductive System Disease,Respiratory Disease	Plasma Membrane	peptidase	Agranulocyte Adhesion and Diapedesis,Bladder Cancer Signaling,Colorectal Cancer Metastasis Signaling,Granulocyte Adhesion and Diapedesis,HIF1α Signaling,Inhibition of Matrix Metalloproteases,Leukocyte Extravasation Signaling	Human,Mouse,Rat	Adipose,Amygdala,B lymphocytes not otherwise specified,Bladder,Blood platelets,Brain,Cerebellum,Cerebral Cortex,Dorsal Root Ganglion,Effector T cells,Epidermis,Heart,Hematopoietic progenitor cells,Hippocampus,Hypothalamus,Kidney,Large Intestine,Liver,Lung,Mammary Gland,Megakaryocytes,Neurons not otherwise specified,Olfactory Bulb,Oocytes,Other Tissues and Primary Cells,Ovary,Pancreas,Pituitary Gl…
rno-miR-140-3p	TargetScan Human	Moderate (predicted)	MOCS2	molybdenum cofactor synthesis 2	Cancer,Developmental Disorder,Gastrointestinal Disease,Hereditary Disorder,Metabolic Disease	Cytoplasm	enzyme	Molybdenum Cofactor Biosynthesis	Human,Mouse,Rat	Adipose,Amygdala,B lymphocytes not otherwise specified,Bladder,Cerebellum,Cerebral Cortex,Cytotoxic T cells,Dorsal Root Ganglion,Effector T cells,Epidermis,Hippocampus,Hypothalamus,Kidney,Large Intestine,Liver,Lung,Mammary Gland,Murine NKT cells,Olfactory Bulb,Ovary,Pancreas,Pituitary Gland,Placenta,Prostate Gland,Retina,Salivary Gland,Skeletal Muscle,Small Intestine,Spleen,Stomach,Substantia Nig…
rno-miR-140-3p	TargetScan Human	Moderate (predicted)	MUM1L1	melanoma associated antigen (mutated) 1-like 1	Cancer,Endocrine System Disorders,Gastrointestinal Disease,Hepatic System Disease,Organismal Injury and Abnormalities,Reproductive System Disease	Cytoplasm	other		Human,Mouse,Rat	Activated helper T cells,Adipose,Amygdala,B lymphocytes not otherwise specified,Bladder,Cerebellum,Cerebral Cortex,Cytotoxic T cells,Dorsal Root Ganglion,Effector T cells,Epidermis,Heart,Hippocampus,Hypothalamus,Kidney,Large Intestine,Liver,Lung,Mammary Gland,Olfactory Bulb,Ovary,Pituitary Gland,Placenta,Prostate Gland,Retina,Salivary Gland,Skeletal Muscle,Spleen,Stomach,Substantia Nigra,Testis,T…
rno-miR-140-3p	TargetScan Human	Moderate (predicted)	MYADM	myeloid-associated differentiation marker	Cancer,Endocrine System Disorders,Gastrointestinal Disease,Hepatic System Disease	Nucleus	other		Human,Mouse,Rat	Activated helper T cells,Adipose,Amygdala,B lymphocytes not otherwise specified,BDCA-1+ dendritic cells,BDCA-3+ dendritic cells,Bladder,Central memory cytotoxic T cells,Dorsal Root Ganglion,Effector memory cytotoxic T cells,Effector memory RA+ cytotoxic T cells,Epidermis,Heart,Immature monocyte-derived dendritic cells,Large Intestine,Lung,Mature monocyte-derived dendritic cells,Monocyte-derived m…
rno-miR-140-3p	TargetScan Human	Moderate (predicted)	NEUROD4	neuronal differentiation 4	Cancer,Developmental Disorder,Neurological Disease	Nucleus	other		Human,Mouse,Rat	Activated Vd2 Gamma-delta T cells,Pituitary Gland,Retina,Vd2 Gamma-delta T cells
rno-miR-140-3p	TargetScan Human	Moderate (predicted)	NF1	neurofibromin 1	Cancer,Cardiovascular Disease,Connective Tissue Disorders,Dermatological Diseases and Conditions,Developmental Disorder,Endocrine System Disorders,Gastrointestinal Disease,Hematological Disease,Hepatic System Disease,Hereditary Disorder,Hypersensitivity Response,Immunological Disease,Inflammatory Response,Metabolic Disease,Neurological Disease,Ophthalmic Disease,Organismal Injury and Abnormalitie…	Cytoplasm	other	Glioblastoma Multiforme Signaling,Molecular Mechanisms of Cancer	Human,Mouse,Rat	Activated CD56bright NK cells,Activated CD56dim NK cells,Activated helper T cells,Activated Vd1 Gamma-delta T cells,Activated Vd2 Gamma-delta T cells,Adipose,Amygdala,B lymphocytes not otherwise specified,BDCA-1+ dendritic cells,BDCA-3+ dendritic cells,Bladder,CD56bright NK cells,Central memory cytotoxic T cells,Central memory helper T cells,Cerebellum,Cytotoxic T cells,Dermis,Dorsal Root Ganglio…
rno-miR-140-3p	TargetScan Human	Moderate (predicted)	NR2F2	nuclear receptor subfamily 2, group F, member 2	Cancer,Cardiovascular Disease,Developmental Disorder,Gastrointestinal Disease,Hepatic System Disease,Organismal Injury and Abnormalities,Renal and Urological Disease,Reproductive System Disease,Skeletal and Muscular Disorders,Tumor Morphology	Nucleus	ligand-dependent nuclear receptor	Adipogenesis pathway,RAR Activation,Role of Oct4 in Mammalian Embryonic Stem Cell Pluripotency	Human,Mouse,Rat	Activated Vd2 Gamma-delta T cells,Adipose,Adrenal Gland,Amygdala,Bladder,Brain,Cerebellum,Cerebral Cortex,Cytotoxic T cells,Dorsal Root Ganglion,Epidermis,Heart,Hippocampus,Hypothalamus,Kidney,Large Intestine,Liver,Lung,Mammary Gland,Olfactory Bulb,Other Cells,Other Nervous System,Other Neurons,Other Organ Systems,Other Tissues and Primary Cells,Ovary,Pituitary Gland,Placenta,Prostate Gland,Retin…
rno-miR-140-3p	TargetScan Human	Moderate (predicted)	NR3C1	nuclear receptor subfamily 3, group C, member 1 (glucocorticoid receptor)	Auditory Disease,Cancer,Cardiovascular Disease,Connective Tissue Disorders,Dermatological Diseases and Conditions,Developmental Disorder,Endocrine System Disorders,Gastrointestinal Disease,Hematological Disease,Hepatic System Disease,Hereditary Disorder,Immunological Disease,Infectious Disease,Inflammatory Disease,Inflammatory Response,Metabolic Disease,Neurological Disease,Nutritional Disease,Op…	Nucleus	ligand-dependent nuclear receptor	Acute Phase Response Signaling,Estrogen Receptor Signaling,Glucocorticoid Receptor Signaling,IL-4 Signaling,MIF-mediated Glucocorticoid Regulation,Prolactin Signaling,PXR/RXR Activation	Human,Mouse,Rat	Adipocytes,Adipose,Adrenal Gland,Amygdala,Astrocytes,B lymphocytes not otherwise specified,Bladder,Bone marrow-derived macrophages,Brain,Brainstem,Cartilage Tissue,Cerebellum,Cerebral Cortex,Cerebral Ventricles,Chondrocytes,Choroid Plexus,Cytotoxic T cells,Dermis,Dorsal Root Ganglion,Effector T cells,Endothelial cells not otherwise specified,Epidermis,Epithelial cells not otherwise specified,Fibr…
rno-miR-140-3p	TargetScan Human	Moderate (predicted)	NR4A3	nuclear receptor subfamily 4, group A, member 3	Cancer,Cardiovascular Disease,Connective Tissue Disorders,Developmental Disorder,Endocrine System Disorders,Gastrointestinal Disease,Hematological Disease,Hepatic System Disease,Immunological Disease,Inflammatory Disease,Inflammatory Response,Metabolic Disease,Neurological Disease,Nutritional Disease,Organismal Injury and Abnormalities,Reproductive System Disease,Skeletal and Muscular Disorders	Nucleus	ligand-dependent nuclear receptor		Human,Mouse,Rat	Activated helper T cells,Activated Vd1 Gamma-delta T cells,Activated Vd2 Gamma-delta T cells,Adipose,Adrenal Gland,Amygdala,BDCA-1+ dendritic cells,BDCA-3+ dendritic cells,Brain,CD56bright NK cells,CD56dim NK cells,Cells not otherwise specified,Central memory cytotoxic T cells,Central memory helper T cells,Cerebellum,Cerebral Cortex,Cytotoxic T cells,Effector memory cytotoxic T cells,Effector mem…
rno-miR-140-3p	TargetScan Human	Moderate (predicted)	NRIP1	nuclear receptor interacting protein 1	Cancer,Dermatological Diseases and Conditions,Endocrine System Disorders,Gastrointestinal Disease,Hepatic System Disease,Nutritional Disease,Organismal Injury and Abnormalities,Reproductive System Disease	Nucleus	transcription regulator	Aryl Hydrocarbon Receptor Signaling,Estrogen Receptor Signaling,Glucocorticoid Receptor Signaling,PPAR Signaling,RAR Activation,Xenobiotic Metabolism Signaling	Human,Mouse,Rat	Adipose,Adrenal Gland,Amygdala,B lymphocytes not otherwise specified,Bladder,Brain,Cerebellum,Cerebral Cortex,Cytotoxic T cells,Dorsal Root Ganglion,Effector T cells,Epidermis,Granulosa cells,Heart,Hippocampus,Hypothalamus,Kidney,Large Intestine,Liver,Lung,Macrophages not otherwise specified,Mammary Gland,Memory B cells,Murine NKT cells,Naive B cells,Olfactory Bulb,Other Cells,Ovary,Pancreas,Pitu…
rno-miR-140-3p	TargetScan Human	Moderate (predicted)	NSF	N-ethylmaleimide-sensitive factor	Cancer,Endocrine System Disorders,Gastrointestinal Disease,Metabolic Disease,Neurological Disease,Psychological Disorders	Cytoplasm	transporter	GABA Receptor Signaling,Huntington's Disease Signaling,Tight Junction Signaling	Human,Mouse,Rat	Activated CD56bright NK cells,Activated CD56dim NK cells,Activated helper T cells,Activated Vd1 Gamma-delta T cells,Activated Vd2 Gamma-delta T cells,Adipose,Adrenal Gland,Amygdala,Astrocytes,B lymphocytes not otherwise specified,BDCA-1+ dendritic cells,BDCA-3+ dendritic cells,Brain,Central memory helper T cells,Cerebellum,Cerebral Cortex,Cytotoxic T cells,Dorsal Root Ganglion,Effector memory cyt…
rno-miR-140-3p	TargetScan Human	Moderate (predicted)	ODF2L	outer dense fiber of sperm tails 2-like	Cancer,Endocrine System Disorders,Respiratory Disease	Cytoplasm	other		Human,Mouse,Rat	Adipose,Amygdala,B lymphocytes not otherwise specified,Bladder,Cerebellum,Cytotoxic T cells,Dorsal Root Ganglion,Effector T cells,Heart,Hippocampus,Hypothalamus,Kidney,Large Intestine,Lung,Mammary Gland,Olfactory Bulb,Ovary,Pituitary Gland,Placenta,Prostate Gland,Retina,Skeletal Muscle,Small Intestine,Stomach,Substantia Nigra,Testis,Thymus,Uterus,A498,A549-ATCC,CCRF-CEM,HOP-62,J774,LOX IMVI,M14,M…
rno-miR-140-3p	TargetScan Human	Moderate (predicted)	OLR1	oxidized low density lipoprotein (lectin-like) receptor 1	Antimicrobial Response,Cancer,Cardiovascular Disease,Developmental Disorder,Gastrointestinal Disease,Hepatic System Disease,Hereditary Disorder,Inflammatory Response,Metabolic Disease,Neurological Disease,Organismal Injury and Abnormalities,Psychological Disorders,Respiratory Disease,Skeletal and Muscular Disorders	Plasma Membrane	transmembrane receptor		Human,Mouse,Rat	Activated CD56dim NK cells,Activated helper T cells,Activated Vd2 Gamma-delta T cells,Adipose,B lymphocytes not otherwise specified,BDCA-1+ dendritic cells,Bone marrow-derived macrophages,CD56bright NK cells,CD56dim NK cells,Central memory cytotoxic T cells,Cerebral Cortex,Cytotoxic T cells,Effector memory cytotoxic T cells,Effector memory helper T cells,Effector memory RA+ cytotoxic T cells,Endo…
rno-miR-140-3p	TargetScan Human	Moderate (predicted)	OTX2	orthodenticle homeobox 2	Cancer,Connective Tissue Disorders,Dental Disease,Dermatological Diseases and Conditions,Developmental Disorder,Endocrine System Disorders,Gastrointestinal Disease,Hepatic System Disease,Hereditary Disorder,Neurological Disease,Ophthalmic Disease,Organismal Injury and Abnormalities,Reproductive System Disease,Skeletal and Muscular Disorders	Nucleus	transcription regulator		Human,Mouse,Rat	Brain,Cerebellum,Hypothalamus,Neurons not otherwise specified,Organ Systems not otherwise specified,Other Nervous System,Other Neurons,Other Stem cells,Other Tissues and Primary Cells,Pituitary Gland,Retina,Th1 cells,Thalamus,CAKI-1,LOX IMVI,Other Cell Line,OVCAR-8,P19,THP-1
rno-miR-140-3p	TargetScan Human	High (predicted)	PCDH8	protocadherin 8	Cancer,Endocrine System Disorders,Gastrointestinal Disease,Hepatic System Disease,Neurological Disease,Psychological Disorders,Respiratory Disease	Plasma Membrane	other		Human,Mouse,Rat	Activated Vd1 Gamma-delta T cells,Amygdala,Brain,Brainstem,Cerebellum,Cerebral Cortex,Epidermis,Hippocampus,Hypothalamus,Kidney,Lung,Olfactory Bulb,Other Tissues and Primary Cells,Pituitary Gland,Retina,Stomach,Striatum,Substantia Nigra,Testis,Thalamus,Thymus,THP-1
rno-miR-140-3p	TargetScan Human	Moderate (predicted)	PEX26	peroxisomal biogenesis factor 26	Cancer,Developmental Disorder,Gastrointestinal Disease,Hepatic System Disease,Hereditary Disorder,Metabolic Disease	Cytoplasm	other		Human,Mouse,Rat	Adipose,Amygdala,B lymphocytes not otherwise specified,Bladder,Brain,Cerebellum,Cerebral Cortex,Cytotoxic T cells,Dorsal Root Ganglion,Effector T cells,Epidermis,Heart,Hippocampus,Hypothalamus,Kidney,Large Intestine,Liver,Lung,Mammary Gland,Olfactory Bulb,Other Organ Systems,Other Tissues and Primary Cells,Ovary,Pancreas,Pituitary Gland,Placenta,Prostate Gland,Retina,Salivary Gland,Skeletal Muscl…
rno-miR-140-3p	TargetScan Human	Moderate (predicted)	PGR	progesterone receptor	Cancer,Cardiovascular Disease,Dermatological Diseases and Conditions,Developmental Disorder,Endocrine System Disorders,Gastrointestinal Disease,Hematological Disease,Hepatic System Disease,Immunological Disease,Infectious Disease,Inflammatory Disease,Inflammatory Response,Metabolic Disease,Neurological Disease,Nutritional Disease,Ophthalmic Disease,Organismal Injury and Abnormalities,Psychologica…	Nucleus	ligand-dependent nuclear receptor	Estrogen Receptor Signaling,Glucocorticoid Receptor Signaling	Human,Mouse,Rat	Adipose,Adrenal Gland,Amygdala,B lymphocytes not otherwise specified,Bladder,Brain,Brainstem,Caudate Nucleus,Cerebellum,Cerebral Cortex,Cerebral Ventricles,Choroid Plexus,Corpus Callosum,Cytotoxic T cells,Dermis,Dorsal Root Ganglion,Effector T cells,Endothelial cells not otherwise specified,Epidermis,Epithelial cells not otherwise specified,Fibroblasts,Gray Matter,Heart,Hippocampus,Hypothalamus,K…
rno-miR-140-3p	TargetScan Human	Moderate (predicted)	PHKB	phosphorylase kinase, beta	Cancer,Cardiovascular Disease,Developmental Disorder,Gastrointestinal Disease,Hereditary Disorder,Metabolic Disease,Organismal Injury and Abnormalities,Reproductive System Disease	Cytoplasm	kinase	Protein Kinase A Signaling,α-Adrenergic Signaling	Human,Mouse,Rat	Adipose,BDCA-1+ dendritic cells,BDCA-3+ dendritic cells,Bladder,Cytotoxic T cells,Effector T cells,Kidney,Large Intestine,Lung,Mature monocyte-derived dendritic cells,Memory B cells,Monocyte-derived macrophage,Naive B cells,Ovary,Pituitary Gland,Plasmacytoid dendritic cells,Prostate Gland,Retina,Skeletal Muscle,Substantia Nigra,786-0,A498,A549-ATCC,ACHN,CAKI-1,CCRF-CEM,COLO205,DU-145,EKVX,H460,HC…
rno-miR-140-3p	TargetScan Human	Moderate (predicted)	PLEKHB2	pleckstrin homology domain containing, family B (evectins) member 2	Cancer,Endocrine System Disorders,Gastrointestinal Disease	Other	other		Human,Mouse,Rat	Adipose,Amygdala,B lymphocytes not otherwise specified,Bladder,Brain,Cerebellum,Cerebral Cortex,Cerebral Ventricles,Choroid Plexus,Cytotoxic T cells,Dorsal Root Ganglion,Effector T cells,Epidermis,Heart,Hippocampus,Hypothalamus,Kidney,Large Intestine,Lung,Murine NKT cells,Neurons not otherwise specified,Olfactory Bulb,Other Organ Systems,Ovary,Pituitary Gland,Placenta,Prostate Gland,Retina,Skelet…
rno-miR-140-3p	TargetScan Human	Moderate (predicted)	POSTN	periostin, osteoblast specific factor	Cancer,Cardiovascular Disease,Connective Tissue Disorders,Dermatological Diseases and Conditions,Developmental Disorder,Endocrine System Disorders,Gastrointestinal Disease,Hepatic System Disease,Hereditary Disorder,Hypersensitivity Response,Inflammatory Disease,Inflammatory Response,Ophthalmic Disease,Organismal Injury and Abnormalities,Reproductive System Disease,Respiratory Disease,Skeletal and…	Extracellular Space	other		Human,Mouse,Rat	Adipocytes,Adipose,Bladder,Brain,Calvaria,Cartilage Tissue,Chondrocytes,Dermis,Dorsal Root Ganglion,Epidermis,Epithelial cells not otherwise specified,Fibroblasts,Heart,Keratinocytes,Kidney,Large Intestine,Liver,Lung,Mammary Gland,Mature monocyte-derived dendritic cells,Olfactory Bulb,Osteoblasts,Other Cells,Other Organ Systems,Other Tissues and Primary Cells,Ovary,Pituitary Gland,Placenta,Prosta…
rno-miR-140-3p	TargetScan Human	High (predicted)	PPAP2B	phosphatidic acid phosphatase type 2B	Cancer,Developmental Disorder,Endocrine System Disorders,Gastrointestinal Disease,Metabolic Disease,Organismal Injury and Abnormalities,Reproductive System Disease	Plasma Membrane	phosphatase	Germ Cell-Sertoli Cell Junction Signaling,ILK Signaling,Sertoli Cell-Sertoli Cell Junction Signaling,Triacylglycerol Biosynthesis	Human,Mouse,Rat	Activated helper T cells,Adipocytes,Adipose,Amygdala,B lymphocytes not otherwise specified,Bladder,CD56dim NK cells,Central memory helper T cells,Cerebellum,Cerebral Cortex,Cytotoxic T cells,Dorsal Root Ganglion,Effector memory helper T cells,Effector T cells,Endothelial cells not otherwise specified,Epidermis,Heart,Hippocampus,Hypothalamus,Immature monocyte-derived dendritic cells,Kidney,Large I…
rno-miR-140-3p	TargetScan Human	Moderate (predicted)	PRKAA2	protein kinase, AMP-activated, alpha 2 catalytic subunit	Cancer,Cardiovascular Disease,Connective Tissue Disorders,Developmental Disorder,Endocrine System Disorders,Gastrointestinal Disease,Hematological Disease,Hepatic System Disease,Metabolic Disease,Neurological Disease,Nutritional Disease,Organismal Injury and Abnormalities	Cytoplasm	kinase	AMPK Signaling,eNOS Signaling,Glucocorticoid Receptor Signaling,mTOR Signaling,PPARα/RXRα Activation,Pyridoxal 5'-phosphate Salvage Pathway,Salvage Pathways of Pyrimidine Ribonucleotides,Type II Diabetes Mellitus Signaling	Human,Mouse,Rat	Adipose,Amygdala,Astrocytes,B lymphocytes not otherwise specified,Bladder,Brain,Cerebellum,Cerebral Cortex,Cytotoxic T cells,Dorsal Root Ganglion,Effector T cells,Endothelial cells not otherwise specified,Epidermis,Granulosa cells,Heart,Hippocampus,Hypothalamus,Kidney,Large Intestine,Liver,Lung,Mammary Gland,Microglia,Neurons not otherwise specified,Olfactory Bulb,Oocytes,Other Cells,Other Organ …
rno-miR-140-3p	TargetScan Human	High (predicted)	PRKCI	protein kinase C, iota	Cancer,Cardiovascular Disease,Dermatological Diseases and Conditions,Developmental Disorder,Endocrine System Disorders,Gastrointestinal Disease,Hematological Disease,Immunological Disease,Infectious Disease,Inflammatory Response,Metabolic Disease,Neurological Disease,Organismal Injury and Abnormalities,Psychological Disorders,Reproductive System Disease,Respiratory Disease,Skeletal and Muscular D…	Cytoplasm	kinase	14-3-3-mediated Signaling,Aldosterone Signaling in Epithelial Cells,Androgen Signaling,Axonal Guidance Signaling,Breast Cancer Regulation by Stathmin1,Calcium-induced T Lymphocyte Apoptosis,CCR3 Signaling in Eosinophils,CCR5 Signaling in Macrophages,Cdc42 Signaling,Cholecystokinin/Gastrin-mediated Signaling,Corticotropin Releasing Hormone Signaling,CREB Signaling in Neurons,CXCR4 Signaling,Dopami…	Human,Mouse,Rat	Activated Vd1 Gamma-delta T cells,Activated Vd2 Gamma-delta T cells,Adipose,Amygdala,B lymphocytes not otherwise specified,BDCA-1+ dendritic cells,BDCA-3+ dendritic cells,Bladder,Central memory cytotoxic T cells,Central memory helper T cells,Cerebellum,Cerebral Cortex,Cytotoxic T cells,Dorsal Root Ganglion,Effector memory cytotoxic T cells,Effector memory helper T cells,Effector memory RA+ cytoto…
rno-miR-140-3p	TargetScan Human	Moderate (predicted)	PYGB	phosphorylase, glycogen; brain	Cancer,Endocrine System Disorders,Gastrointestinal Disease,Organismal Injury and Abnormalities,Renal and Urological Disease	Cytoplasm	enzyme	Glycogen Degradation II,Glycogen Degradation III,Protein Kinase A Signaling,α-Adrenergic Signaling	Human,Mouse,Rat	Adipose,Amygdala,B lymphocytes not otherwise specified,Bladder,Cerebellum,Cerebral Cortex,Cytotoxic T cells,Dorsal Root Ganglion,Effector T cells,Epidermis,Heart,Hippocampus,Hypothalamus,Kidney,Large Intestine,Liver,Lung,Mammary Gland,Memory B cells,Murine NKT cells,Naive B cells,Olfactory Bulb,Ovary,Pituitary Gland,Placenta,Prostate Gland,Retina,Salivary Gland,Skeletal Muscle,Small Intestine,Spl…
rno-miR-140-3p	TargetScan Human	Moderate (predicted)	RAB1A	RAB1A, member RAS oncogene family	Antimicrobial Response,Cancer,Cardiovascular Disease,Developmental Disorder,Inflammatory Response,Neurological Disease,Organismal Injury and Abnormalities,Reproductive System Disease,Skeletal and Muscular Disorders	Cytoplasm	enzyme		Human,Mouse,Rat	Activated CD56bright NK cells,Activated CD56dim NK cells,Activated Vd1 Gamma-delta T cells,Activated Vd2 Gamma-delta T cells,Adipose,Amygdala,B lymphocytes not otherwise specified,BDCA-1+ dendritic cells,BDCA-3+ dendritic cells,Bladder,Central memory helper T cells,Cerebellum,Cerebral Cortex,Cytotoxic T cells,Dorsal Root Ganglion,Effector memory cytotoxic T cells,Effector memory helper T cells,Ef…
rno-miR-140-3p	TargetScan Human	Moderate (predicted)	RAB2A	RAB2A, member RAS oncogene family	Cardiovascular Disease,Connective Tissue Disorders,Developmental Disorder,Immunological Disease,Infectious Disease,Inflammatory Disease,Organismal Injury and Abnormalities,Reproductive System Disease,Skeletal and Muscular Disorders	Cytoplasm	enzyme		Human,Mouse,Rat	Activated CD56bright NK cells,Activated CD56dim NK cells,Activated helper T cells,Activated Vd1 Gamma-delta T cells,Activated Vd2 Gamma-delta T cells,Adipose,Amygdala,B lymphocytes not otherwise specified,BDCA-1+ dendritic cells,BDCA-3+ dendritic cells,Bladder,CD56bright NK cells,CD56dim NK cells,Central memory cytotoxic T cells,Central memory helper T cells,Cerebellum,Cerebral Cortex,Cytotoxic T…
rno-miR-140-3p	TargetScan Human	Moderate (predicted)	RAB3GAP2	RAB3 GTPase activating protein subunit 2 (non-catalytic)	Cancer,Developmental Disorder,Endocrine System Disorders,Gastrointestinal Disease,Hepatic System Disease,Hereditary Disorder,Neurological Disease,Ophthalmic Disease,Organismal Injury and Abnormalities,Reproductive System Disease	Cytoplasm	enzyme		Human,Mouse,Rat	Activated Vd1 Gamma-delta T cells,Activated Vd2 Gamma-delta T cells,Adipose,Amygdala,B lymphocytes not otherwise specified,BDCA-1+ dendritic cells,Bladder,Central memory cytotoxic T cells,Cerebellum,Cerebral Cortex,Cytotoxic T cells,Dorsal Root Ganglion,Effector memory cytotoxic T cells,Effector memory RA+ cytotoxic T cells,Effector T cells,Epidermis,Hippocampus,Hypothalamus,Immature monocyte-der…
rno-miR-140-3p	TargetScan Human	High (predicted)	RBFOX2	RNA binding protein, fox-1 homolog (C. elegans) 2	Cancer,Endocrine System Disorders,Organismal Injury and Abnormalities,Reproductive System Disease	Nucleus	transcription regulator	Estrogen Receptor Signaling	Human,Mouse,Rat	Adipose,Amygdala,BDCA-1+ dendritic cells,CD56bright NK cells,Cerebellum,Cerebral Cortex,Dorsal Root Ganglion,Effector memory cytotoxic T cells,Effector memory helper T cells,Effector memory RA+ cytotoxic T cells,Epidermis,Heart,Immature monocyte-derived dendritic cells,Liver,Monocyte-derived macrophage,Naive helper T cells,Natural T-regulatory cells,Neutrophils,Olfactory Bulb,Other Tissues and Pr…
rno-miR-140-3p	TargetScan Human	Moderate (predicted)	RBL1	retinoblastoma-like 1	Cancer,Connective Tissue Disorders,Dental Disease,Dermatological Diseases and Conditions,Developmental Disorder,Endocrine System Disorders,Gastrointestinal Disease,Hematological Disease,Hepatic System Disease,Immunological Disease,Inflammatory Response,Ophthalmic Disease,Organismal Injury and Abnormalities,Reproductive System Disease,Respiratory Disease,Skeletal and Muscular Disorders,Tumor Morph…	Nucleus	transcription regulator	Aryl Hydrocarbon Receptor Signaling,Cell Cycle: G1/S Checkpoint Regulation,Chronic Myeloid Leukemia Signaling,Estrogen-mediated S-phase Entry,Glioma Signaling,Molecular Mechanisms of Cancer,Role of BRCA1 in DNA Damage Response	Human,Mouse,Rat	Activated CD56bright NK cells,Activated CD56dim NK cells,Activated helper T cells,Activated Vd1 Gamma-delta T cells,Activated Vd2 Gamma-delta T cells,Adipose,Amygdala,B lymphocytes not otherwise specified,BDCA-1+ dendritic cells,BDCA-3+ dendritic cells,Bladder,Brain,Central memory cytotoxic T cells,Central memory helper T cells,Cerebellum,Cerebral Cortex,Cerebral Ventricles,Cytotoxic T cells,Dors…
rno-miR-140-3p	TargetScan Human	Moderate (predicted)	RET	ret proto-oncogene	Auditory Disease,Cancer,Cardiovascular Disease,Connective Tissue Disorders,Dermatological Diseases and Conditions,Developmental Disorder,Endocrine System Disorders,Gastrointestinal Disease,Hematological Disease,Hepatic System Disease,Hereditary Disorder,Immunological Disease,Inflammatory Disease,Inflammatory Response,Neurological Disease,Organismal Injury and Abnormalities,Psychological Disorders…	Plasma Membrane	kinase	GDNF Family Ligand-Receptor Interactions,Thyroid Cancer Signaling	Human,Mouse,Rat	Adipose,Adrenal Gland,Amygdala,Astrocytes,Brain,Brainstem,Cells not otherwise specified,Cerebellum,Cerebral Cortex,Dorsal Root Ganglion,Epithelial cells not otherwise specified,Gray Matter,Heart,Hematopoietic progenitor cells,Hippocampus,Hypothalamus,Kidney,Large Intestine,Liver,Mammary Gland,Medulla Oblongata,Monocytes not otherwise specified,Neurons not otherwise specified,Neutrophils,Olfactory…
rno-miR-140-3p	TargetScan Human	Moderate (predicted)	RHOA	ras homolog family member A	Cancer,Cardiovascular Disease,Connective Tissue Disorders,Dermatological Diseases and Conditions,Developmental Disorder,Gastrointestinal Disease,Hematological Disease,Hypersensitivity Response,Immunological Disease,Infectious Disease,Inflammatory Disease,Inflammatory Response,Neurological Disease,Ophthalmic Disease,Organismal Injury and Abnormalities,Renal and Urological Disease,Reproductive Syst…	Cytoplasm	enzyme	Actin Cytoskeleton Signaling,Actin Nucleation by ARP-WASP Complex,Axonal Guidance Signaling,Breast Cancer Regulation by Stathmin1,Cardiac Hypertrophy Signaling,CCR3 Signaling in Eosinophils,Chemokine Signaling,Cholecystokinin/Gastrin-mediated Signaling,Colorectal Cancer Metastasis Signaling,CXCR4 Signaling,Ephrin A Signaling,Ephrin B Signaling,Ephrin Receptor Signaling,Epithelial Adherens Junctio…	Human,Mouse,Rat	Adipose,Amygdala,B lymphocytes not otherwise specified,BDCA-1+ dendritic cells,BDCA-3+ dendritic cells,Bladder,Brain,Cardiomyocytes,Central memory cytotoxic T cells,Cerebellum,Cerebral Cortex,Cytotoxic T cells,Dorsal Root Ganglion,Effector memory cytotoxic T cells,Effector memory RA+ cytotoxic T cells,Effector T cells,Epidermis,Granule Cell Layer,Heart,Hippocampus,HUVEC cells,Hypothalamus,Immatur…
rno-miR-140-3p	TargetScan Human	Moderate (predicted)	RINL	Ras and Rab interactor-like	Cancer,Endocrine System Disorders,Gastrointestinal Disease,Immunological Disease,Metabolic Disease	Other	other		Human,Mouse,Rat	Adipose,Amygdala,B lymphocytes not otherwise specified,Bladder,Cerebellum,Cytotoxic T cells,Dorsal Root Ganglion,Effector T cells,Epidermis,Hippocampus,Hypothalamus,Kidney,Large Intestine,Liver,Lung,Mammary Gland,Olfactory Bulb,Pituitary Gland,Placenta,Prostate Gland,Retina,Salivary Gland,Skeletal Muscle,Small Intestine,Spleen,Stomach,Substantia Nigra,Thymus,Uterus,J774
rno-miR-140-3p	TargetScan Human	Moderate (predicted)	ROBO2	roundabout, axon guidance receptor, homolog 2 (Drosophila)	Cancer,Endocrine System Disorders,Gastrointestinal Disease,Hepatic System Disease,Hereditary Disorder,Metabolic Disease,Organismal Injury and Abnormalities,Renal and Urological Disease,Reproductive System Disease	Plasma Membrane	transmembrane receptor	Axonal Guidance Signaling	Human,Mouse,Rat	Amygdala,Brain,Brainstem,Cells not otherwise specified,Cerebellum,Cerebral Cortex,Dorsal Root Ganglion,Granule Cell Layer,Granule cells,Hippocampus,Hypothalamus,Kidney,Large Intestine,Lung,Medulla Oblongata,Neurons not otherwise specified,Nucleus Accumbens,Olfactory Bulb,Other Cells,Other Nervous System,Other Neurons,Other Organ Systems,Other Tissues and Primary Cells,Ovary,Pancreas,Pituitary Gla…
rno-miR-140-3p	TargetScan Human	Moderate (predicted)	RPS6KB1	ribosomal protein S6 kinase, 70kDa, polypeptide 1	Cancer,Cardiovascular Disease,Dermatological Diseases and Conditions,Developmental Disorder,Endocrine System Disorders,Gastrointestinal Disease,Hematological Disease,Hereditary Disorder,Immunological Disease,Metabolic Disease,Neurological Disease,Nutritional Disease,Organismal Injury and Abnormalities,Psychological Disorders,Reproductive System Disease,Respiratory Disease	Cytoplasm	kinase	Acute Myeloid Leukemia Signaling,Adipogenesis pathway,AMPK Signaling,B Cell Receptor Signaling,Cardiac Hypertrophy Signaling,CNTF Signaling,EGF Signaling,ErbB Signaling,ERK5 Signaling,Erythropoietin Signaling,Fcγ Receptor-mediated Phagocytosis in Macrophages and Monocytes,FLT3 Signaling in Hematopoietic Progenitor Cells,Glioblastoma Multiforme Signaling,Growth Hormone Signaling,IGF-1 Signaling,IL…	Human,Mouse,Rat	Activated CD56dim NK cells,Activated helper T cells,Activated Vd1 Gamma-delta T cells,Activated Vd2 Gamma-delta T cells,Adipose,Amygdala,Astrocytes,B lymphocytes not otherwise specified,BDCA-1+ dendritic cells,BDCA-3+ dendritic cells,Bladder,Brain,CD56bright NK cells,CD56dim NK cells,Central memory cytotoxic T cells,Central memory helper T cells,Cerebellum,Cerebral Cortex,Cytotoxic T cells,Dorsal…
rno-miR-140-3p	TargetScan Human	Moderate (predicted)	RSAD2	radical S-adenosyl methionine domain containing 2	Antimicrobial Response,Cancer,Cardiovascular Disease,Dermatological Diseases and Conditions,Endocrine System Disorders,Gastrointestinal Disease,Infectious Disease,Inflammatory Disease,Inflammatory Response,Metabolic Disease,Neurological Disease,Organismal Injury and Abnormalities,Renal and Urological Disease,Skeletal and Muscular Disorders	Cytoplasm	enzyme	Role of Lipids/Lipid Rafts in the Pathogenesis of Influenza	Human,Mouse,Rat	Activated CD56bright NK cells,Adipose,Amygdala,B lymphocytes not otherwise specified,BDCA-1+ dendritic cells,BDCA-3+ dendritic cells,Bladder,Central memory cytotoxic T cells,Cerebellum,Cerebral Cortex,Cytotoxic T cells,Dorsal Root Ganglion,Effector memory cytotoxic T cells,Effector memory RA+ cytotoxic T cells,Effector T cells,Epidermis,Heart,Hippocampus,Hypothalamus,Immature monocyte-derived den…
rno-miR-140-3p	TargetScan Human	Moderate (predicted)	SBDS	Shwachman-Bodian-Diamond syndrome	Dermatological Diseases and Conditions,Developmental Disorder,Endocrine System Disorders,Gastrointestinal Disease,Hematological Disease,Hereditary Disorder,Immunological Disease,Inflammatory Disease,Inflammatory Response,Organismal Injury and Abnormalities	Nucleus	other		Human,Mouse,Rat	Adipose,Amygdala,B lymphocytes not otherwise specified,Bladder,Brain,Cerebellum,Cerebral Cortex,Cytotoxic T cells,Dorsal Root Ganglion,Effector T cells,Epidermis,Heart,Hematopoietic progenitor cells,Hippocampus,Hypothalamus,Kidney,Large Intestine,Liver,Lung,Mammary Gland,Murine NKT cells,Olfactory Bulb,Other Tissues and Primary Cells,Ovary,Pancreas,Pituitary Gland,Placenta,Prostate Gland,Retina,S…
rno-miR-140-3p	TargetScan Human	High (predicted)	SCP2	sterol carrier protein 2	Cancer,Cardiovascular Disease,Developmental Disorder,Gastrointestinal Disease,Hematological Disease,Hepatic System Disease,Hereditary Disorder,Inflammatory Disease,Inflammatory Response,Metabolic Disease,Neurological Disease,Nutritional Disease,Organismal Injury and Abnormalities,Psychological Disorders,Reproductive System Disease	Cytoplasm	transporter	Bile Acid Biosynthesis, Neutral Pathway	Human,Mouse,Rat	Adipose,Amygdala,B lymphocytes not otherwise specified,Bladder,Cerebellum,Cerebral Cortex,Cytotoxic T cells,Dorsal Root Ganglion,Effector T cells,Epidermis,Heart,Hippocampus,Hypothalamus,Kidney,Large Intestine,Liver,Lung,Mammary Gland,Memory B cells,Murine NKT cells,Naive B cells,Olfactory Bulb,Ovary,Pancreas,Peritoneal macrophages,Pituitary Gland,Placenta,Prostate Gland,Retina,Salivary Gland,Ske…
rno-miR-140-3p	TargetScan Human	Moderate (predicted)	SDC4	syndecan 4	Cancer,Connective Tissue Disorders,Dermatological Diseases and Conditions,Endocrine System Disorders,Gastrointestinal Disease,Hepatic System Disease,Hereditary Disorder,Immunological Disease,Inflammatory Disease,Inflammatory Response,Neurological Disease,Organismal Injury and Abnormalities,Psychological Disorders,Renal and Urological Disease,Skeletal and Muscular Disorders	Plasma Membrane	other	Agranulocyte Adhesion and Diapedesis,Granulocyte Adhesion and Diapedesis,PCP pathway	Human,Mouse,Rat	Activated CD56bright NK cells,Activated CD56dim NK cells,Activated helper T cells,Activated Vd1 Gamma-delta T cells,Activated Vd2 Gamma-delta T cells,Adipose,Amygdala,Astrocytes,B lymphocytes not otherwise specified,BDCA-1+ dendritic cells,BDCA-3+ dendritic cells,Bladder,Brain,Cartilage Tissue,Central memory cytotoxic T cells,Central memory helper T cells,Cerebellum,Cerebral Cortex,Dorsal Root Ga…
rno-miR-140-3p	TargetScan Human	High (predicted)	SGIP1	SH3-domain GRB2-like (endophilin) interacting protein 1	Cancer,Endocrine System Disorders,Gastrointestinal Disease,Hepatic System Disease,Organismal Injury and Abnormalities,Renal and Urological Disease,Reproductive System Disease	Cytoplasm	other		Human,Mouse,Rat	Adipose,Amygdala,B lymphocytes not otherwise specified,Bladder,Cerebellum,Cerebral Cortex,Cytotoxic T cells,Dorsal Root Ganglion,Effector T cells,Epidermis,Heart,Hippocampus,Hypothalamus,Kidney,Large Intestine,Liver,Lung,Mammary Gland,Monocyte-derived macrophage,Olfactory Bulb,Ovary,Pituitary Gland,Placenta,Prostate Gland,Retina,Salivary Gland,Skeletal Muscle,Small Intestine,Spleen,Stomach,Substa…
rno-miR-140-3p	TargetScan Human	Moderate (predicted)	SGSM1	small G protein signaling modulator 1	Cancer,Endocrine System Disorders,Gastrointestinal Disease,Hepatic System Disease	Nucleus	other		Human,Mouse,Rat	Adipose,Amygdala,B lymphocytes not otherwise specified,Bladder,Brain,Cerebellum,Cerebral Cortex,Cytotoxic T cells,Dorsal Root Ganglion,Effector T cells,Epidermis,Heart,Hippocampus,Hypothalamus,Kidney,Large Intestine,Lung,Mammary Gland,Olfactory Bulb,Ovary,Pancreas,Pituitary Gland,Placenta,Prostate Gland,Retina,Skeletal Muscle,Small Intestine,Spleen,Stomach,Striatum,Substantia Nigra,Thymus,Uterus
rno-miR-140-3p	TargetScan Human	Moderate (predicted)	SIRT1	sirtuin 1	Cancer,Cardiovascular Disease,Connective Tissue Disorders,Developmental Disorder,Endocrine System Disorders,Gastrointestinal Disease,Hematological Disease,Hepatic System Disease,Hereditary Disorder,Immunological Disease,Infectious Disease,Inflammatory Disease,Inflammatory Response,Metabolic Disease,Neurological Disease,Nutritional Disease,Ophthalmic Disease,Organismal Injury and Abnormalities,Psy…	Nucleus	transcription regulator	Adipogenesis pathway,p53 Signaling	Human,Mouse,Rat	Adipocytes,Adipose,Amygdala,B lymphocytes not otherwise specified,Bladder,Brain,Cardiomyocytes,Cartilage Tissue,Cerebellum,Cerebral Cortex,Cytotoxic T cells,Dendritic cells not otherwise specified,Dorsal Root Ganglion,Effector T cells,Epidermis,Heart,Hepatocytes,Hippocampus,Hypothalamus,Immune cells not otherwise specified,Kidney,Large Intestine,Liver,Lung,Mammary Gland,Olfactory Bulb,Other Cells…
rno-miR-140-3p	TargetScan Human	Moderate (predicted)	SIRT3	sirtuin 3	Cancer,Cardiovascular Disease,Developmental Disorder,Endocrine System Disorders,Gastrointestinal Disease,Hepatic System Disease,Immunological Disease,Inflammatory Disease,Inflammatory Response,Metabolic Disease,Nutritional Disease,Organismal Injury and Abnormalities,Respiratory Disease	Cytoplasm	enzyme		Human,Mouse,Rat	Activated CD56bright NK cells,Activated CD56dim NK cells,Activated helper T cells,Activated Vd1 Gamma-delta T cells,Activated Vd2 Gamma-delta T cells,Adipose,BDCA-1+ dendritic cells,BDCA-3+ dendritic cells,Brain,CD56bright NK cells,CD56dim NK cells,Central memory cytotoxic T cells,Central memory helper T cells,Cerebellum,Cerebral Cortex,Cytotoxic T cells,Dorsal Root Ganglion,Effector memory cytot…
rno-miR-140-3p	TargetScan Human	High (predicted)	SLC1A4	solute carrier family 1 (glutamate/neutral amino acid transporter), member 4	Cancer,Connective Tissue Disorders,Developmental Disorder,Gastrointestinal Disease,Hepatic System Disease,Hereditary Disorder,Inflammatory Disease,Neurological Disease,Ophthalmic Disease,Organismal Injury and Abnormalities,Psychological Disorders,Renal and Urological Disease,Reproductive System Disease,Skeletal and Muscular Disorders	Plasma Membrane	transporter	Glutamate Receptor Signaling	Human,Mouse,Rat	Activated helper T cells,Amygdala,B lymphocytes not otherwise specified,BDCA-1+ dendritic cells,BDCA-3+ dendritic cells,Bladder,Brain,Central memory cytotoxic T cells,Cerebellum,Cerebral Cortex,Dorsal Root Ganglion,Effector memory cytotoxic T cells,Effector memory RA+ cytotoxic T cells,Epidermis,Heart,Hippocampus,Hypothalamus,Kidney,Large Intestine,Lung,Mammary Gland,Mature monocyte-derived dendr…
rno-miR-140-3p	TargetScan Human	High (predicted)	SLC24A1	solute carrier family 24 (sodium/potassium/calcium exchanger), member 1	Developmental Disorder,Hereditary Disorder,Neurological Disease,Ophthalmic Disease,Organismal Injury and Abnormalities	Plasma Membrane	transporter		Human,Mouse,Rat	Activated CD56bright NK cells,Activated CD56dim NK cells,Activated Vd2 Gamma-delta T cells,Adipose,Amygdala,B lymphocytes not otherwise specified,BDCA-1+ dendritic cells,BDCA-3+ dendritic cells,Blood platelets,Cerebellum,Dorsal Root Ganglion,Epidermis,Immature monocyte-derived dendritic cells,Kidney,Large Intestine,Liver,Mammary Gland,Mature monocyte-derived dendritic cells,Monocyte-derived macro…
rno-miR-140-3p	TargetScan Human	Moderate (predicted)	SLC30A8	solute carrier family 30 (zinc transporter), member 8	Cancer,Endocrine System Disorders,Gastrointestinal Disease,Hepatic System Disease,Metabolic Disease,Nutritional Disease,Organismal Injury and Abnormalities,Reproductive System Disease,Respiratory Disease	Cytoplasm	transporter		Human,Mouse,Rat	Adipose,Amygdala,B lymphocytes not otherwise specified,Bladder,Central memory cytotoxic T cells,Cerebellum,Cerebral Cortex,Cytotoxic T cells,Dorsal Root Ganglion,Effector memory cytotoxic T cells,Effector memory RA+ cytotoxic T cells,Effector T cells,Epidermis,Heart,Hippocampus,Hypothalamus,Large Intestine,Lung,Mammary Gland,Olfactory Bulb,Ovary,Pancreas,Pituitary Gland,Placenta,Retina,Skeletal M…
rno-miR-140-3p	TargetScan Human	Moderate (predicted)	SMARCA2	SWI/SNF related, matrix associated, actin dependent regulator of chromatin, subfamily a, member 2	Cancer,Developmental Disorder,Gastrointestinal Disease,Hematological Disease,Hepatic System Disease,Hereditary Disorder,Immunological Disease,Infectious Disease,Neurological Disease,Nutritional Disease,Organismal Injury and Abnormalities,Psychological Disorders,Renal and Urological Disease,Reproductive System Disease	Nucleus	transcription regulator	AMPK Signaling,Glucocorticoid Receptor Signaling,Hereditary Breast Cancer Signaling,RAR Activation,Role of BRCA1 in DNA Damage Response	Human,Mouse,Rat	Activated Vd2 Gamma-delta T cells,Adipose,Amygdala,B lymphocytes not otherwise specified,Bladder,Brain,Central memory cytotoxic T cells,Cerebellum,Cerebral Cortex,Cytotoxic T cells,Dorsal Root Ganglion,Effector memory cytotoxic T cells,Effector memory helper T cells,Effector memory RA+ cytotoxic T cells,Effector T cells,Embryonic stem cells,Epidermis,Heart,Hippocampus,Hypothalamus,Kidney,Large In…
rno-miR-140-3p	TargetScan Human	Moderate (predicted)	SMARCC1	SWI/SNF related, matrix associated, actin dependent regulator of chromatin, subfamily c, member 1	Cancer,Connective Tissue Disorders,Developmental Disorder,Endocrine System Disorders,Gastrointestinal Disease,Neurological Disease,Organismal Injury and Abnormalities,Renal and Urological Disease,Skeletal and Muscular Disorders	Nucleus	transcription regulator		Human,Mouse,Rat	Activated CD56bright NK cells,Activated CD56dim NK cells,Activated helper T cells,Activated Vd1 Gamma-delta T cells,Activated Vd2 Gamma-delta T cells,Adipose,Amygdala,B lymphocytes not otherwise specified,BDCA-1+ dendritic cells,BDCA-3+ dendritic cells,Bladder,Brain,Central memory cytotoxic T cells,Central memory helper T cells,Cerebellum,Cerebral Cortex,Cytotoxic T cells,Dorsal Root Ganglion,Eff…
rno-miR-140-3p	TargetScan Human	Moderate (predicted)	SNX27	sorting nexin family member 27	Cancer,Developmental Disorder,Gastrointestinal Disease,Hepatic System Disease,Neurological Disease,Nutritional Disease,Organismal Injury and Abnormalities,Psychological Disorders,Reproductive System Disease	Cytoplasm	other		Human,Mouse,Rat	Activated CD56bright NK cells,Activated CD56dim NK cells,Activated helper T cells,Activated Vd1 Gamma-delta T cells,Activated Vd2 Gamma-delta T cells,Adipose,Amygdala,B lymphocytes not otherwise specified,BDCA-1+ dendritic cells,BDCA-3+ dendritic cells,Bladder,CD56dim NK cells,Central memory cytotoxic T cells,Central memory helper T cells,Cerebellum,Cerebral Cortex,Cytotoxic T cells,Dorsal Root G…
rno-miR-140-3p	TargetScan Human	High (predicted)	SOBP	sine oculis binding protein homolog (Drosophila)	Cancer,Connective Tissue Disorders,Developmental Disorder,Endocrine System Disorders,Gastrointestinal Disease,Hepatic System Disease,Hereditary Disorder,Neurological Disease,Ophthalmic Disease,Skeletal and Muscular Disorders	Nucleus	other		Human,Mouse,Rat	Activated CD56bright NK cells,Activated helper T cells,Activated Vd1 Gamma-delta T cells,Amygdala,BDCA-1+ dendritic cells,BDCA-3+ dendritic cells,Brain,CD56bright NK cells,CD56dim NK cells,Central memory cytotoxic T cells,Central memory helper T cells,Cerebellum,Cerebral Cortex,Dorsal Root Ganglion,Effector memory helper T cells,Effector memory RA+ cytotoxic T cells,Heart,Hippocampus,Hypothalamus…
rno-miR-140-3p	TargetScan Human	Moderate (predicted)	SON	SON DNA binding protein	Cancer,Endocrine System Disorders,Gastrointestinal Disease,Hepatic System Disease,Infectious Disease,Organismal Injury and Abnormalities,Reproductive System Disease,Respiratory Disease	Nucleus	other		Human,Mouse,Rat	Activated CD56bright NK cells,Activated CD56dim NK cells,Activated helper T cells,Activated Vd1 Gamma-delta T cells,Activated Vd2 Gamma-delta T cells,Adipose,Adrenal Gland,Amygdala,B lymphocytes not otherwise specified,BDCA-1+ dendritic cells,BDCA-3+ dendritic cells,Bladder,Brain,CD56bright NK cells,CD56dim NK cells,Central memory cytotoxic T cells,Central memory helper T cells,Cerebellum,Cerebra…
rno-miR-140-3p	TargetScan Human	Moderate (predicted)	SPN	sialophorin	Antimicrobial Response,Cancer,Cardiovascular Disease,Endocrine System Disorders,Gastrointestinal Disease,Hepatic System Disease,Immunological Disease,Infectious Disease,Inflammatory Disease,Inflammatory Response,Metabolic Disease,Neurological Disease,Organismal Injury and Abnormalities,Renal and Urological Disease	Plasma Membrane	transmembrane receptor	B Cell Development,Leukocyte Extravasation Signaling	Human,Mouse,Rat	Adipose,B lymphocytes not otherwise specified,Bladder,Cerebral Cortex,Cytotoxic T cells,Dorsal Root Ganglion,Effector T cells,Epidermis,Heart,Hematopoietic progenitor cells,Hippocampus,Hypothalamus,Immune cells not otherwise specified,Large Intestine,Lung,Macrophages not otherwise specified,Mammary Gland,Monocytes not otherwise specified,Olfactory Bulb,Other Cells,Other T lymphocytes,Other Tissue…
rno-miR-140-3p	TargetScan Human	High (predicted)	SPRED2	sprouty-related, EVH1 domain containing 2	Cancer,Connective Tissue Disorders,Developmental Disorder,Hereditary Disorder,Organismal Injury and Abnormalities,Reproductive System Disease	Extracellular Space	cytokine		Human,Mouse,Rat	Activated CD56bright NK cells,Activated CD56dim NK cells,Activated helper T cells,Activated Vd1 Gamma-delta T cells,Activated Vd2 Gamma-delta T cells,Adipose,Amygdala,B lymphocytes not otherwise specified,BDCA-1+ dendritic cells,BDCA-3+ dendritic cells,Bladder,CD56bright NK cells,CD56dim NK cells,Central memory cytotoxic T cells,Cerebellum,Cerebral Cortex,Cytotoxic T cells,Dorsal Root Ganglion,Ef…
rno-miR-140-3p	TargetScan Human	Moderate (predicted)	SRGAP3	SLIT-ROBO Rho GTPase activating protein 3	Cancer,Developmental Disorder,Gastrointestinal Disease,Hereditary Disorder,Neurological Disease,Organismal Injury and Abnormalities,Renal and Urological Disease	Cytoplasm	other	Axonal Guidance Signaling	Human,Mouse,Rat	Activated CD56dim NK cells,Adipose,Amygdala,B lymphocytes not otherwise specified,BDCA-1+ dendritic cells,BDCA-3+ dendritic cells,Bladder,Brain,Cerebellum,Cerebral Cortex,Cytotoxic T cells,Dorsal Root Ganglion,Effector T cells,Epidermis,Heart,Hippocampus,Hypothalamus,Kidney,Large Intestine,Liver,Lung,Mammary Gland,Neurons not otherwise specified,Olfactory Bulb,Ovary,Pituitary Gland,Placenta,Prost…
rno-miR-140-3p	TargetScan Human	High (predicted)	STAG2	stromal antigen 2	Cancer,Endocrine System Disorders,Gastrointestinal Disease,Hematological Disease,Hepatic System Disease,Immunological Disease,Organismal Injury and Abnormalities,Renal and Urological Disease,Reproductive System Disease	Nucleus	other	Mitotic Roles of Polo-Like Kinase	Human,Mouse,Rat	Activated CD56bright NK cells,Activated CD56dim NK cells,Activated helper T cells,Activated Vd1 Gamma-delta T cells,Activated Vd2 Gamma-delta T cells,Adipose,Amygdala,B lymphocytes not otherwise specified,BDCA-1+ dendritic cells,BDCA-3+ dendritic cells,Bladder,CD56bright NK cells,CD56dim NK cells,Central memory cytotoxic T cells,Central memory helper T cells,Cerebellum,Cerebral Cortex,Cytotoxic T…
rno-miR-140-3p	TargetScan Human	Moderate (predicted)	SULF2	sulfatase 2	Cancer,Connective Tissue Disorders,Developmental Disorder,Gastrointestinal Disease,Hepatic System Disease,Infectious Disease,Organismal Injury and Abnormalities,Skeletal and Muscular Disorders	Plasma Membrane	enzyme		Human,Mouse,Rat	Adipose,Amygdala,BDCA-1+ dendritic cells,BDCA-3+ dendritic cells,Bladder,Brain,Cartilage Tissue,Cerebellum,Cerebral Cortex,Chondrocytes,Dorsal Root Ganglion,Epidermis,Heart,Hippocampus,Hypothalamus,Immature monocyte-derived dendritic cells,Kidney,Large Intestine,Liver,Lung,Mammary Gland,Mature monocyte-derived dendritic cells,Monocyte-derived macrophage,Olfactory Bulb,Other Tissues and Primary Ce…
rno-miR-140-3p	TargetScan Human	Moderate (predicted)	SYN1	synapsin I	Cancer,Endocrine System Disorders,Gastrointestinal Disease,Hereditary Disorder,Neurological Disease,Organismal Injury and Abnormalities,Psychological Disorders,Reproductive System Disease,Skeletal and Muscular Disorders	Plasma Membrane	transporter		Human,Mouse,Rat	Amygdala,BDCA-3+ dendritic cells,Brain,Cerebellum,Cerebral Cortex,Cortical neurons,Dorsal Root Ganglion,Hippocampus,Hypothalamus,Lens,Liver,Neurons not otherwise specified,Olfactory Bulb,Pancreas,Pituitary Gland,Retina,Skeletal Muscle,Substantia Nigra,CCRF-CEM,HS 578T,INS-1,MALME-3M,MDA-N,Min6,NCI-H226,NCI-H23,Other Cell Line,Other Neuroblastoma Cell Lines,OVCAR-8,SF-295,SK-MEL-2,SR
rno-miR-140-3p	TargetScan Human	Moderate (predicted)	TAB1	TGF-beta activated kinase 1/MAP3K7 binding protein 1	Cardiovascular Disease,Developmental Disorder,Organismal Injury and Abnormalities,Skeletal and Muscular Disorders	Cytoplasm	enzyme	Acute Phase Response Signaling,BMP signaling pathway,Cardiac Hypertrophy Signaling,Dendritic Cell Maturation,Glucocorticoid Receptor Signaling,IL-1 Signaling,IL-10 Signaling,IL-6 Signaling,iNOS Signaling,Molecular Mechanisms of Cancer,Mouse Embryonic Stem Cell Pluripotency,NF-κB Signaling,p38 MAPK Signaling,PPAR Signaling,SAPK/JNK Signaling,TGF-β Signaling,Toll-like Receptor Signaling,Wnt/β-caten…	Human,Mouse,Rat	Activated CD56bright NK cells,Adipose,Amygdala,B lymphocytes not otherwise specified,BDCA-1+ dendritic cells,BDCA-3+ dendritic cells,Bladder,Brain,Cerebellum,Cytotoxic T cells,Effector T cells,Heart,Hippocampus,Hypothalamus,Kidney,Large Intestine,Liver,Lung,Olfactory Bulb,Other Cells,Other Tissues and Primary Cells,Ovary,Pancreas,Peripheral blood leukocytes not otherwise specified,Pituitary Gland…
rno-miR-140-3p	TargetScan Human	Moderate (predicted)	TAB2	TGF-beta activated kinase 1/MAP3K7 binding protein 2	Cancer,Cardiovascular Disease,Developmental Disorder,Gastrointestinal Disease,Hepatic System Disease,Hereditary Disorder,Inflammatory Response,Organismal Injury and Abnormalities	Cytoplasm	other	IL-1 Signaling,Molecular Mechanisms of Cancer,NF-κB Signaling,p38 MAPK Signaling,RANK Signaling in Osteoclasts,Role of Osteoblasts, Osteoclasts and Chondrocytes in Rheumatoid Arthritis,Role of PKR in Interferon Induction and Antiviral Response,Toll-like Receptor Signaling	Human,Mouse,Rat	Adipose,Amygdala,B lymphocytes not otherwise specified,Bladder,Brain,Cerebellum,Cerebral Cortex,Cytotoxic T cells,Dorsal Root Ganglion,Effector T cells,Epidermis,Heart,Hippocampus,Hypothalamus,Kidney,Large Intestine,Liver,Lung,Mammary Gland,Memory B cells,Murine NKT cells,Naive B cells,Olfactory Bulb,Other Cells,Other Organ Systems,Other Tissues and Primary Cells,Ovary,Pituitary Gland,Placenta,Pr…
rno-miR-140-3p	TargetScan Human	Moderate (predicted)	TASP1	taspase, threonine aspartase, 1	Cancer,Developmental Disorder,Gastrointestinal Disease,Hepatic System Disease,Neurological Disease,Organismal Injury and Abnormalities,Reproductive System Disease,Skeletal and Muscular Disorders	Nucleus	peptidase		Human,Mouse,Rat	Activated CD56bright NK cells,Activated CD56dim NK cells,Activated helper T cells,Activated Vd1 Gamma-delta T cells,Activated Vd2 Gamma-delta T cells,Amygdala,BDCA-1+ dendritic cells,BDCA-3+ dendritic cells,CD56bright NK cells,Central memory cytotoxic T cells,Central memory helper T cells,Cytotoxic T cells,Dorsal Root Ganglion,Effector memory cytotoxic T cells,Effector memory helper T cells,Effec…
rno-miR-140-3p	TargetScan Human	Moderate (predicted)	TBX18	T-box 18	Cancer,Endocrine System Disorders,Organismal Injury and Abnormalities,Renal and Urological Disease	Nucleus	transcription regulator		Human,Mouse,Rat	Adipose,Amygdala,Bladder,Cardiomyocytes,Cerebral Cortex,Cytotoxic T cells,Dorsal Root Ganglion,Effector T cells,Epidermis,Heart,Hippocampus,Kidney,Large Intestine,Liver,Lung,Mammary Gland,Olfactory Bulb,Other Epithelial cells,Other Tissues and Primary Cells,Ovary,Pituitary Gland,Prostate Gland,Retina,Salivary Gland,Small Intestine,Substantia Nigra,Testis,Thymus,ACHN,BT-549,EKVX,HCT-116,HL-60,K-56…
rno-miR-140-3p	TargetScan Human	Moderate (predicted)	TEX15	testis expressed 15	Cancer,Endocrine System Disorders,Gastrointestinal Disease,Hematological Disease,Hepatic System Disease,Immunological Disease,Neurological Disease,Organismal Injury and Abnormalities,Reproductive System Disease	Extracellular Space	other		Human,Mouse,Rat	Adipose,Amygdala,B lymphocytes not otherwise specified,Bladder,Cerebellum,Cerebral Cortex,Cytotoxic T cells,Dorsal Root Ganglion,Effector T cells,Epidermis,Heart,Hippocampus,Hypothalamus,Kidney,Large Intestine,Liver,Lung,Mammary Gland,Monocyte-derived macrophage,Olfactory Bulb,Other Cells,Ovary,Pancreas,Pituitary Gland,Placenta,Prostate Gland,Retina,Salivary Gland,Skeletal Muscle,Small Intestine,…
rno-miR-140-3p	TargetScan Human	Moderate (predicted)	TH	tyrosine hydroxylase	Cancer,Cardiovascular Disease,Connective Tissue Disorders,Developmental Disorder,Endocrine System Disorders,Gastrointestinal Disease,Hematological Disease,Hereditary Disorder,Immunological Disease,Inflammatory Disease,Metabolic Disease,Neurological Disease,Nutritional Disease,Organismal Injury and Abnormalities,Psychological Disorders,Respiratory Disease,Skeletal and Muscular Disorders	Cytoplasm	enzyme	Catecholamine Biosynthesis,Dopamine Receptor Signaling,Protein Kinase A Signaling	Human,Mouse,Rat	Adipose,Adrenal Gland,Amygdala,Astrocytes,B lymphocytes not otherwise specified,Beta islet cells,Bladder,Brain,Brainstem,CD4+ T-lymphocytes,Cerebellum,Cerebral Cortex,Cytotoxic T cells,Dorsal Root Ganglion,Effector T cells,Epidermis,Fibroblasts,Heart,Hippocampus,Hypothalamus,Kidney,Large Intestine,Liver,Lung,Mammary Gland,Mesenchymal stem cells,Monocyte-derived macrophage,Neurons not otherwise sp…
rno-miR-140-3p	TargetScan Human	Moderate (predicted)	TRIM33	tripartite motif containing 33	Cancer,Developmental Disorder,Endocrine System Disorders,Gastrointestinal Disease,Hepatic System Disease,Neurological Disease,Organismal Injury and Abnormalities,Renal and Urological Disease	Nucleus	transcription regulator		Human,Mouse,Rat	Activated CD56bright NK cells,Activated CD56dim NK cells,Activated helper T cells,Activated Vd1 Gamma-delta T cells,Activated Vd2 Gamma-delta T cells,Adipose,Adrenal Gland,Amygdala,B lymphocytes not otherwise specified,BDCA-1+ dendritic cells,BDCA-3+ dendritic cells,Bladder,Brain,Central memory cytotoxic T cells,Central memory helper T cells,Cerebellum,Cerebral Cortex,Cytotoxic T cells,Dorsal Roo…
rno-miR-140-3p	TargetScan Human	Moderate (predicted)	TSPAN7	tetraspanin 7	Cancer,Developmental Disorder,Gastrointestinal Disease,Hereditary Disorder,Neurological Disease	Plasma Membrane	other	Integrin Signaling	Human,Mouse,Rat	Adipose,Amygdala,Bladder,Cerebellum,Cerebral Cortex,Dorsal Root Ganglion,Epidermis,Heart,Hippocampus,Hypothalamus,Large Intestine,Lung,Olfactory Bulb,Other Nervous System,Ovary,Pituitary Gland,Retina,Skeletal Muscle,Small Intestine,Substantia Nigra,A549-ATCC,CCRF-CEM,H460,M14,MALME-3M,MOLT-4,SK-MEL-28
rno-miR-140-3p	TargetScan Human	High (predicted)	TTC21B	tetratricopeptide repeat domain 21B	Cancer,Connective Tissue Disorders,Developmental Disorder,Gastrointestinal Disease,Hepatic System Disease,Hereditary Disorder,Organismal Injury and Abnormalities,Renal and Urological Disease,Skeletal and Muscular Disorders	Extracellular Space	other		Human,Mouse,Rat	Adipose,Amygdala,B lymphocytes not otherwise specified,Bladder,Cerebellum,Cytotoxic T cells,Dorsal Root Ganglion,Effector T cells,Epidermis,Hippocampus,Hypothalamus,Kidney,Large Intestine,Liver,Olfactory Bulb,Ovary,Pituitary Gland,Plasmacytoid dendritic cells,Prostate Gland,Retina,Substantia Nigra,Testis,Thymus,Uterus,Vd2 Gamma-delta T cells,J774,M14,SF-268,SF-539,SK-MEL-5
rno-miR-140-3p	TargetScan Human	Moderate (predicted)	UBR2	ubiquitin protein ligase E3 component n-recognin 2	Cancer,Cardiovascular Disease,Developmental Disorder,Endocrine System Disorders,Gastrointestinal Disease,Hepatic System Disease,Organismal Injury and Abnormalities,Reproductive System Disease	Nucleus	enzyme	Protein Ubiquitination Pathway	Human,Mouse,Rat	Activated CD56bright NK cells,Activated CD56dim NK cells,Activated helper T cells,Activated Vd1 Gamma-delta T cells,Activated Vd2 Gamma-delta T cells,Adipose,Amygdala,B lymphocytes not otherwise specified,BDCA-1+ dendritic cells,BDCA-3+ dendritic cells,Bladder,Central memory cytotoxic T cells,Central memory helper T cells,Cerebellum,Cerebral Cortex,Cytotoxic T cells,Dorsal Root Ganglion,Effector …
rno-miR-140-3p	TargetScan Human	Moderate (predicted)	USP1	ubiquitin specific peptidase 1	Cancer,Connective Tissue Disorders,Dermatological Diseases and Conditions,Endocrine System Disorders,Gastrointestinal Disease,Hematological Disease,Hepatic System Disease,Metabolic Disease,Organismal Injury and Abnormalities,Reproductive System Disease,Skeletal and Muscular Disorders,Tumor Morphology	Cytoplasm	peptidase	Protein Ubiquitination Pathway	Human,Mouse,Rat	Adipose,Amygdala,B lymphocytes not otherwise specified,Bladder,Cerebellum,Cerebral Cortex,Cytotoxic T cells,Dorsal Root Ganglion,Effector T cells,Epidermis,Heart,Hippocampus,Hypothalamus,Kidney,Large Intestine,Liver,Lung,Mammary Gland,Memory B cells,Murine NKT cells,Naive B cells,Olfactory Bulb,Ovary,Pituitary Gland,Placenta,Prostate Gland,Retina,Salivary Gland,Skeletal Muscle,Small Intestine,Spl…
rno-miR-140-3p	TargetScan Human	Moderate (predicted)	USP14	ubiquitin specific peptidase 14 (tRNA-guanine transglycosylase)	Developmental Disorder,Neurological Disease,Skeletal and Muscular Disorders	Cytoplasm	peptidase	NRF2-mediated Oxidative Stress Response,Protein Ubiquitination Pathway	Human,Mouse,Rat	Activated helper T cells,Adipose,Amygdala,B lymphocytes not otherwise specified,BDCA-1+ dendritic cells,BDCA-3+ dendritic cells,Bladder,Brain,Central memory cytotoxic T cells,Cerebellum,Cerebral Cortex,Cytotoxic T cells,Dorsal Root Ganglion,Effector memory cytotoxic T cells,Effector memory RA+ cytotoxic T cells,Effector T cells,Epidermis,Heart,Hippocampus,Hypothalamus,Immature monocyte-derived de…
rno-miR-140-3p	TargetScan Human	High (predicted)	WIF1	WNT inhibitory factor 1	Cancer,Connective Tissue Disorders,Endocrine System Disorders,Organismal Injury and Abnormalities,Renal and Urological Disease,Reproductive System Disease,Skeletal and Muscular Disorders	Extracellular Space	other	Role of Macrophages, Fibroblasts and Endothelial Cells in Rheumatoid Arthritis,Role of Osteoblasts, Osteoclasts and Chondrocytes in Rheumatoid Arthritis,Wnt/β-catenin Signaling	Human,Mouse,Rat	Activated Vd2 Gamma-delta T cells,Cartilage Tissue,Dermis,Endothelial cells not otherwise specified,Epidermis,Fibroblasts,Hypothalamus,Keratinocytes,Large Intestine,Lung,Olfactory Bulb,Other Cells,Other Nervous System,Other Organ Systems,Pituitary Gland,Prostate Gland,Sciatic Nerve,Skin,Uterus,Other Cell Line,Other Neuroblastoma Cell Lines
rno-miR-140-3p	TargetScan Human	Moderate (predicted)	WIPF1	WAS/WASL interacting protein family, member 1	Cancer,Developmental Disorder,Gastrointestinal Disease,Hepatic System Disease,Hereditary Disorder,Hypersensitivity Response,Immunological Disease,Infectious Disease,Inflammatory Response,Organismal Injury and Abnormalities,Reproductive System Disease	Cytoplasm	other	Actin Nucleation by ARP-WASP Complex,Axonal Guidance Signaling,Cdc42 Signaling,Ephrin Receptor Signaling,Integrin Signaling,Leukocyte Extravasation Signaling,Regulation of Actin-based Motility by Rho,Signaling by Rho Family GTPases	Human,Mouse,Rat	Activated CD56bright NK cells,Activated CD56dim NK cells,Activated helper T cells,Activated Vd1 Gamma-delta T cells,Activated Vd2 Gamma-delta T cells,Adipose,Amygdala,B lymphocytes not otherwise specified,BDCA-1+ dendritic cells,BDCA-3+ dendritic cells,Bladder,Brain,CD56bright NK cells,CD56dim NK cells,Central memory cytotoxic T cells,Central memory helper T cells,Cerebellum,Cerebral Cortex,Cytot…
rno-miR-140-3p	TargetScan Human	Moderate (predicted)	XRCC5	X-ray repair complementing defective repair in Chinese hamster cells 5 (double-strand-break rejoining)	Cancer,Connective Tissue Disorders,Developmental Disorder,Gastrointestinal Disease,Hematological Disease,Hepatic System Disease,Hereditary Disorder,Immunological Disease,Inflammatory Response,Neurological Disease,Organismal Injury and Abnormalities,Reproductive System Disease,Respiratory Disease,Skeletal and Muscular Disorders,Tumor Morphology	Nucleus	enzyme	DNA Double-Strand Break Repair by Non-Homologous End Joining,Telomere Extension by Telomerase	Human,Mouse,Rat	Adipose,Amygdala,B lymphocytes not otherwise specified,BDCA-1+ dendritic cells,Bladder,Bone marrow cells not otherwise specified,Brain,Central memory cytotoxic T cells,Cerebellum,Cerebral Cortex,Cytotoxic T cells,Dorsal Root Ganglion,Effector memory cytotoxic T cells,Effector memory RA+ cytotoxic T cells,Effector T cells,Embryonic stem cells,Epidermis,Heart,Hippocampus,Hypothalamus,Kidney,Large I…
rno-miR-140-3p	TargetScan Human	Moderate (predicted)	YWHAZ	tyrosine 3-monooxygenase/tryptophan 5-monooxygenase activation protein, zeta	Cancer,Endocrine System Disorders,Gastrointestinal Disease,Hematological Disease,Hereditary Disorder,Immunological Disease,Metabolic Disease,Neurological Disease,Organismal Injury and Abnormalities,Psychological Disorders,Reproductive System Disease,Skeletal and Muscular Disorders,Tumor Morphology	Cytoplasm	enzyme	14-3-3-mediated Signaling,Cell Cycle: G2/M DNA Damage Checkpoint Regulation,ERK/MAPK Signaling,ERK5 Signaling,HIPPO signaling,IGF-1 Signaling,Myc Mediated Apoptosis Signaling,p70S6K Signaling,PI3K/AKT Signaling,Protein Kinase A Signaling	Human,Mouse,Rat	Activated CD56bright NK cells,Activated CD56dim NK cells,Activated helper T cells,Activated Vd1 Gamma-delta T cells,Activated Vd2 Gamma-delta T cells,Adipose,Amygdala,B lymphocytes not otherwise specified,BDCA-1+ dendritic cells,BDCA-3+ dendritic cells,Bladder,Brain,CD56bright NK cells,CD56dim NK cells,Central memory cytotoxic T cells,Central memory helper T cells,Cerebellum,Cerebral Cortex,Cytot…
rno-miR-140-3p	TargetScan Human	High (predicted)	ZC3H6	zinc finger CCCH-type containing 6	Cancer,Endocrine System Disorders,Gastrointestinal Disease,Hepatic System Disease	Other	other		Human,Mouse,Rat	Activated helper T cells,Adipose,Amygdala,B lymphocytes not otherwise specified,BDCA-1+ dendritic cells,Bladder,Central memory cytotoxic T cells,Cerebellum,Cerebral Cortex,Effector memory cytotoxic T cells,Effector memory RA+ cytotoxic T cells,Hippocampus,Hypothalamus,Immature monocyte-derived dendritic cells,Mature monocyte-derived dendritic cells,Monocyte-derived macrophage,Natural T-regulatory…
rno-miR-140-3p	TargetScan Human	Moderate (predicted)	ZFPM2	zinc finger protein, FOG family member 2	Cancer,Cardiovascular Disease,Dermatological Diseases and Conditions,Developmental Disorder,Endocrine System Disorders,Gastrointestinal Disease,Hepatic System Disease,Hereditary Disorder,Organismal Injury and Abnormalities,Reproductive System Disease,Respiratory Disease,Skeletal and Muscular Disorders	Nucleus	transcription regulator		Human,Mouse,Rat	Adipose,Amygdala,Bladder,Brain,Cerebellum,Cerebral Cortex,Dorsal Root Ganglion,Effector T cells,Epidermis,Heart,Hippocampus,Hypothalamus,Kidney,Large Intestine,Lung,Mammary Gland,Olfactory Bulb,Ovary,Pituitary Gland,Placenta,Retina,Skeletal Muscle,Spleen,Substantia Nigra,Testis,Uterus,HS 578T,K-562,NCI-H226,Other Cell Line,T47-D,U251
rno-miR-140-3p	TargetScan Human	Moderate (predicted)	ZNF148	zinc finger protein 148	Cancer,Developmental Disorder,Gastrointestinal Disease,Hepatic System Disease,Infectious Disease,Inflammatory Disease,Inflammatory Response,Organismal Injury and Abnormalities,Renal and Urological Disease,Reproductive System Disease	Nucleus	transcription regulator		Human,Mouse,Rat	Adipose,Amygdala,B lymphocytes not otherwise specified,Bladder,Cerebellum,Cerebral Cortex,Cytotoxic T cells,Effector T cells,Heart,Hippocampus,Hypothalamus,Kidney,Large Intestine,Liver,Lung,Memory B cells,Murine NKT cells,Naive B cells,Olfactory Bulb,Other Organ Systems,Ovary,Pituitary Gland,Placenta,Prostate Gland,Retina,Salivary Gland,Skeletal Muscle,Skin,Small Intestine,Spleen,Stomach,Substant…
rno-miR-140-3p	TargetScan Human	Moderate (predicted)	ZXDB	zinc finger, X-linked, duplicated B	Cancer,Endocrine System Disorders,Organismal Injury and Abnormalities,Reproductive System Disease	Nucleus	other		Human,Mouse,Rat	Activated CD56bright NK cells,Activated Vd1 Gamma-delta T cells,Activated Vd2 Gamma-delta T cells,Adipose,B lymphocytes not otherwise specified,BDCA-1+ dendritic cells,BDCA-3+ dendritic cells,CD56bright NK cells,CD56dim NK cells,Central memory cytotoxic T cells,Central memory helper T cells,Cytotoxic T cells,Dorsal Root Ganglion,Effector memory cytotoxic T cells,Effector memory helper T cells,Eff…
rno-miR-141-3p	TargetScan Human	Moderate (predicted)	ADAM23	ADAM metallopeptidase domain 23	Cancer,Endocrine System Disorders,Gastrointestinal Disease,Hepatic System Disease,Organismal Injury and Abnormalities,Renal and Urological Disease,Reproductive System Disease	Plasma Membrane	peptidase	Axonal Guidance Signaling	Human,Mouse,Rat	Adipose,Amygdala,B lymphocytes not otherwise specified,Bladder,Brain,CD56dim NK cells,Central memory cytotoxic T cells,Central memory helper T cells,Cerebellum,Cerebral Cortex,Cytotoxic T cells,Dorsal Root Ganglion,Effector memory helper T cells,Effector T cells,Epidermis,Heart,Hippocampus,Hypothalamus,Immature monocyte-derived dendritic cells,Kidney,Large Intestine,Liver,Lymph node,Mammary Gland…
rno-miR-141-3p	TargetScan Human	High (predicted)	AGPS	alkylglycerone phosphate synthase	Cancer,Connective Tissue Disorders,Developmental Disorder,Hereditary Disorder,Metabolic Disease,Neurological Disease,Organismal Injury and Abnormalities,Reproductive System Disease,Skeletal and Muscular Disorders	Cytoplasm	enzyme		Human,Mouse,Rat	Activated CD56bright NK cells,Activated CD56dim NK cells,Activated helper T cells,Activated Vd1 Gamma-delta T cells,Activated Vd2 Gamma-delta T cells,Adipose,Amygdala,B lymphocytes not otherwise specified,BDCA-1+ dendritic cells,BDCA-3+ dendritic cells,Bladder,CD56dim NK cells,Central memory cytotoxic T cells,Central memory helper T cells,Cerebellum,Cerebral Cortex,Cytotoxic T cells,Dorsal Root G…
rno-miR-141-3p	TargetScan Human	Moderate (predicted)	AK2	adenylate kinase 2	Cancer,Developmental Disorder,Endocrine System Disorders,Gastrointestinal Disease,Hematological Disease,Hepatic System Disease,Hereditary Disorder,Immunological Disease,Neurological Disease,Organismal Injury and Abnormalities,Psychological Disorders,Reproductive System Disease,Respiratory Disease	Cytoplasm	kinase	AMPK Signaling	Human,Mouse,Rat	Activated CD56bright NK cells,Activated CD56dim NK cells,Activated helper T cells,Activated Vd1 Gamma-delta T cells,Activated Vd2 Gamma-delta T cells,Adipose,Amygdala,B lymphocytes not otherwise specified,BDCA-1+ dendritic cells,BDCA-3+ dendritic cells,Bladder,CD56bright NK cells,CD56dim NK cells,Central memory cytotoxic T cells,Central memory helper T cells,Cerebellum,Cerebral Cortex,Cytotoxic T…
rno-miR-141-3p	TargetScan Human	High (predicted)	AKAP11	A kinase (PRKA) anchor protein 11	Cancer,Endocrine System Disorders,Gastrointestinal Disease,Neurological Disease,Organismal Injury and Abnormalities,Psychological Disorders,Reproductive System Disease	Cytoplasm	other	cAMP-mediated signaling,Cardiac β-adrenergic Signaling,Protein Kinase A Signaling	Human,Mouse,Rat	Activated CD56bright NK cells,Activated CD56dim NK cells,Activated helper T cells,Activated Vd1 Gamma-delta T cells,Activated Vd2 Gamma-delta T cells,Adipose,Amygdala,B lymphocytes not otherwise specified,BDCA-1+ dendritic cells,BDCA-3+ dendritic cells,Bladder,CD56bright NK cells,CD56dim NK cells,Central memory cytotoxic T cells,Central memory helper T cells,Cerebellum,Cerebral Cortex,Cytotoxic T…
rno-miR-141-3p	TargetScan Human	Moderate (predicted)	ALG2	ALG2, alpha-1,3/1,6-mannosyltransferase	Cancer,Developmental Disorder,Hereditary Disorder,Metabolic Disease,Neurological Disease,Psychological Disorders	Cytoplasm	enzyme		Human,Mouse,Rat	Activated helper T cells,Adipose,Amygdala,BDCA-1+ dendritic cells,BDCA-3+ dendritic cells,Bladder,Central memory cytotoxic T cells,Cerebellum,Cerebral Cortex,Dorsal Root Ganglion,Effector memory cytotoxic T cells,Effector memory RA+ cytotoxic T cells,Hippocampus,Hypothalamus,Immature monocyte-derived dendritic cells,Kidney,Mature monocyte-derived dendritic cells,Monocyte-derived macrophage,Murine…
rno-miR-141-3p	TargetScan Human	High (predicted)	AMPD2	adenosine monophosphate deaminase 2	Cancer,Developmental Disorder,Gastrointestinal Disease,Neurological Disease,Organismal Injury and Abnormalities,Renal and Urological Disease	Cytoplasm	enzyme		Human,Mouse,Rat	Activated CD56bright NK cells,Activated CD56dim NK cells,Activated helper T cells,Activated Vd1 Gamma-delta T cells,Activated Vd2 Gamma-delta T cells,BDCA-1+ dendritic cells,BDCA-3+ dendritic cells,CD56bright NK cells,CD56dim NK cells,Central memory cytotoxic T cells,Central memory helper T cells,Cerebellum,Cytotoxic T cells,Dorsal Root Ganglion,Effector memory cytotoxic T cells,Effector memory h…
rno-miR-141-3p	TargetScan Human	High (predicted)	APBB2	amyloid beta (A4) precursor protein-binding, family B, member 2	Cancer,Developmental Disorder,Hereditary Disorder,Metabolic Disease,Neurological Disease,Organismal Injury and Abnormalities,Psychological Disorders,Reproductive System Disease	Cytoplasm	other		Human,Mouse,Rat	Activated CD56dim NK cells,Activated Vd1 Gamma-delta T cells,Activated Vd2 Gamma-delta T cells,Adipose,Amygdala,BDCA-1+ dendritic cells,BDCA-3+ dendritic cells,Bladder,Brain,CD56bright NK cells,CD56dim NK cells,Cerebellum,Cerebral Cortex,Cytotoxic T cells,Dorsal Root Ganglion,Effector memory helper T cells,Effector T cells,Epidermis,Heart,Hippocampus,Hypothalamus,Kidney,Large Intestine,Liver,Lung…
rno-miR-141-3p	TargetScan Human	Moderate (predicted)	APPL1	adaptor protein, phosphotyrosine interaction, PH domain and leucine zipper containing 1	Cancer,Endocrine System Disorders,Gastrointestinal Disease,Metabolic Disease	Cytoplasm	other	Colorectal Cancer Metastasis Signaling,Wnt/β-catenin Signaling	Human,Mouse,Rat	Adipose,Amygdala,B lymphocytes not otherwise specified,Bladder,Brain,Cerebellum,Cerebral Cortex,Cytotoxic T cells,Dermis,Dorsal Root Ganglion,Effector T cells,Heart,Hepatocytes,Hippocampus,Hypothalamus,Keratinocytes,Kidney,Large Intestine,Liver,Lung,Olfactory Bulb,Other Tissues and Primary Cells,Ovary,Pancreas,Pituitary Gland,Placenta,Prostate Gland,Retina,Skeletal Muscle,Skin,Small Intestine,Spl…
rno-miR-141-3p	TargetScan Human	Moderate (predicted)	AQP11	aquaporin 11	Developmental Disorder,Organismal Injury and Abnormalities,Renal and Urological Disease	Plasma Membrane	transporter		Human,Mouse,Rat	Amygdala,Brain,Cerebral Cortex,Dorsal Root Ganglion,Heart,Hippocampus,Kidney,Large Intestine,Liver,Mammary Gland,Other Organ Systems,Pituitary Gland,Retina,Small Intestine,Substantia Nigra,Testis,Thymus,NCI-H226
rno-miR-141-3p	TargetScan Human	High (predicted)	ARFGEF2	ADP-ribosylation factor guanine nucleotide-exchange factor 2 (brefeldin A-inhibited)	Cancer,Connective Tissue Disorders,Developmental Disorder,Endocrine System Disorders,Gastrointestinal Disease,Hepatic System Disease,Hereditary Disorder,Neurological Disease,Organismal Injury and Abnormalities,Reproductive System Disease,Skeletal and Muscular Disorders	Cytoplasm	other		Human,Mouse,Rat	Activated CD56bright NK cells,Activated CD56dim NK cells,Activated helper T cells,Activated Vd1 Gamma-delta T cells,Activated Vd2 Gamma-delta T cells,Adipose,Amygdala,B lymphocytes not otherwise specified,BDCA-1+ dendritic cells,BDCA-3+ dendritic cells,Bladder,CD56bright NK cells,CD56dim NK cells,Central memory cytotoxic T cells,Central memory helper T cells,Cerebellum,Cerebral Cortex,Cytotoxic T…
rno-miR-141-3p	TargetScan Human	High (predicted)	ARHGAP23	Rho GTPase activating protein 23	Cancer,Endocrine System Disorders,Gastrointestinal Disease,Hepatic System Disease,Infectious Disease,Organismal Injury and Abnormalities,Renal and Urological Disease,Reproductive System Disease	Cytoplasm	other		Human,Mouse,Rat	Adipose,Amygdala,B lymphocytes not otherwise specified,Bladder,Cerebellum,Cerebral Cortex,Cytotoxic T cells,Dorsal Root Ganglion,Effector T cells,Epidermis,Heart,Hypothalamus,Kidney,Liver,Lung,Mammary Gland,Ovary,Pancreas,Pituitary Gland,Placenta,Retina,Small Intestine,Spleen,Stomach,Substantia Nigra,Testis,Thymus,786-0,A498,A549-ATCC,ACHN,BT-549,CAKI-1,CCRF-CEM,COLO205,DU-145,EKVX,H460,HCC-2998,…
rno-miR-141-3p	TargetScan Human	High (predicted)	ARNTL	aryl hydrocarbon receptor nuclear translocator-like	Cancer,Cardiovascular Disease,Connective Tissue Disorders,Dermatological Diseases and Conditions,Developmental Disorder,Endocrine System Disorders,Gastrointestinal Disease,Hematological Disease,Hepatic System Disease,Hereditary Disorder,Hypersensitivity Response,Infectious Disease,Inflammatory Response,Metabolic Disease,Neurological Disease,Nutritional Disease,Ophthalmic Disease,Organismal Injury…	Nucleus	transcription regulator	Adipogenesis pathway,Circadian Rhythm Signaling	Human,Mouse,Rat	Adipose,Adrenal Gland,Amygdala,B lymphocytes not otherwise specified,Beta islet cells,Brain,Cerebellum,Cerebral Cortex,Cytotoxic T cells,Effector T cells,Epidermis,Hippocampus,Hypothalamus,Large Intestine,Lung,Mammary Gland,Murine NKT cells,Olfactory Bulb,Other Epithelial cells,Other Organ Systems,Other Tissues and Primary Cells,Ovary,Pancreas,Pituitary Gland,Placenta,Prostate Gland,Retina,Skelet…
rno-miR-141-3p	TargetScan Human	Moderate (predicted)	ASPH	aspartate beta-hydroxylase	Cancer,Cardiovascular Disease,Connective Tissue Disorders,Developmental Disorder,Gastrointestinal Disease,Hepatic System Disease,Hereditary Disorder,Neurological Disease,Organismal Injury and Abnormalities,Skeletal and Muscular Disorders,Tumor Morphology	Cytoplasm	enzyme	Calcium Signaling	Human,Mouse,Rat	Activated CD56bright NK cells,Adipose,Amygdala,B lymphocytes not otherwise specified,BDCA-1+ dendritic cells,BDCA-3+ dendritic cells,Bladder,Cerebellum,Cerebral Cortex,Cytotoxic T cells,Dorsal Root Ganglion,Effector T cells,Epidermis,Heart,Hippocampus,Hypothalamus,Immature monocyte-derived dendritic cells,Kidney,Large Intestine,Liver,Lung,Mammary Gland,Mature monocyte-derived dendritic cells,Mono…
rno-miR-141-3p	TargetScan Human	High (predicted)	ATAT1	alpha tubulin acetyltransferase 1	Cancer,Connective Tissue Disorders,Endocrine System Disorders,Gastrointestinal Disease,Hepatic System Disease,Immunological Disease,Inflammatory Disease,Metabolic Disease,Organismal Injury and Abnormalities,Reproductive System Disease,Skeletal and Muscular Disorders	Other	enzyme		Human,Mouse,Rat	Adipose,Amygdala,BDCA-1+ dendritic cells,BDCA-3+ dendritic cells,Bladder,Brain,Cerebellum,Cerebral Cortex,Cytotoxic T cells,Dorsal Root Ganglion,Effector T cells,Epidermis,Heart,Hippocampus,Hypothalamus,Kidney,Large Intestine,Liver,Lung,Mammary Gland,Monocyte-derived macrophage,Olfactory Bulb,Ovary,Pituitary Gland,Placenta,Plasmacytoid dendritic cells,Prostate Gland,Retina,Skeletal Muscle,Small I…
rno-miR-141-3p	TargetScan Human	High (predicted)	ATP2A2	ATPase, Ca++ transporting, cardiac muscle, slow twitch 2	Cancer,Cardiovascular Disease,Dermatological Diseases and Conditions,Developmental Disorder,Endocrine System Disorders,Gastrointestinal Disease,Hematological Disease,Hepatic System Disease,Hereditary Disorder,Metabolic Disease,Neurological Disease,Nutritional Disease,Organismal Injury and Abnormalities,Psychological Disorders,Reproductive System Disease,Respiratory Disease,Skeletal and Muscular D…	Cytoplasm	transporter	Calcium Signaling,Calcium Transport I,Calcium-induced T Lymphocyte Apoptosis,Cardiac β-adrenergic Signaling,Dopamine-DARPP32 Feedback in cAMP Signaling,Nitric Oxide Signaling in the Cardiovascular System	Human,Mouse,Rat	Activated CD56bright NK cells,Activated CD56dim NK cells,Activated helper T cells,Activated Vd1 Gamma-delta T cells,Activated Vd2 Gamma-delta T cells,Adipose,Amygdala,BDCA-1+ dendritic cells,BDCA-3+ dendritic cells,Beta islet cells,Bladder,Blood platelets,Brain,Cardiomyocytes,CD56bright NK cells,CD56dim NK cells,Central memory cytotoxic T cells,Central memory helper T cells,Cerebellum,Cerebral Co…
rno-miR-141-3p	TargetScan Human	High (predicted)	ATP6V1A	ATPase, H+ transporting, lysosomal 70kDa, V1 subunit A	Cancer,Cardiovascular Disease,Endocrine System Disorders,Gastrointestinal Disease,Hereditary Disorder,Infectious Disease,Neurological Disease,Organismal Injury and Abnormalities,Psychological Disorders,Renal and Urological Disease,Reproductive System Disease,Skeletal and Muscular Disorders	Plasma Membrane	transporter		Human,Mouse,Rat	Activated CD56bright NK cells,Activated CD56dim NK cells,Activated helper T cells,Activated Vd1 Gamma-delta T cells,Activated Vd2 Gamma-delta T cells,Adipose,Amygdala,B lymphocytes not otherwise specified,BDCA-1+ dendritic cells,BDCA-3+ dendritic cells,Bladder,CD56bright NK cells,Central memory cytotoxic T cells,Central memory helper T cells,Cerebellum,Cerebral Cortex,Cytotoxic T cells,Dorsal Roo…
rno-miR-141-3p	TargetScan Human	High (predicted)	ATP6V1B2	ATPase, H+ transporting, lysosomal 56/58kDa, V1 subunit B2	Cancer,Endocrine System Disorders,Gastrointestinal Disease,Hematological Disease,Hereditary Disorder,Immunological Disease,Infectious Disease,Neurological Disease,Organismal Injury and Abnormalities,Psychological Disorders,Skeletal and Muscular Disorders	Cytoplasm	transporter		Human,Mouse,Rat	Activated CD56bright NK cells,Activated CD56dim NK cells,Activated helper T cells,Activated Vd1 Gamma-delta T cells,Activated Vd2 Gamma-delta T cells,Adipose,Amygdala,B lymphocytes not otherwise specified,BDCA-1+ dendritic cells,BDCA-3+ dendritic cells,Bladder,CD56bright NK cells,CD56dim NK cells,Central memory cytotoxic T cells,Central memory helper T cells,Cerebellum,Cerebral Cortex,Cytotoxic T…
rno-miR-141-3p	TargetScan Human	High (predicted)	ATP8A1	ATPase, aminophospholipid transporter (APLT), class I, type 8A, member 1	Cancer,Connective Tissue Disorders,Endocrine System Disorders,Gastrointestinal Disease,Hepatic System Disease,Immunological Disease,Inflammatory Disease,Metabolic Disease,Neurological Disease,Psychological Disorders,Skeletal and Muscular Disorders	Cytoplasm	transporter		Human,Mouse,Rat	Activated Vd1 Gamma-delta T cells,Adipose,Amygdala,B lymphocytes not otherwise specified,CD56bright NK cells,Central memory cytotoxic T cells,Cerebellum,Cerebral Cortex,Dorsal Root Ganglion,Effector memory cytotoxic T cells,Effector memory RA+ cytotoxic T cells,Effector T cells,Heart,Hippocampus,Hypothalamus,Large Intestine,Lung,Memory B cells,Natural T-regulatory cells,Olfactory Bulb,Ovary,Pitui…
rno-miR-141-3p	TargetScan Human	Moderate (predicted)	AVPR1A	arginine vasopressin receptor 1A	Cancer,Cardiovascular Disease,Endocrine System Disorders,Gastrointestinal Disease,Hematological Disease,Hereditary Disorder,Immunological Disease,Infectious Disease,Metabolic Disease,Neurological Disease,Nutritional Disease,Organismal Injury and Abnormalities,Psychological Disorders,Reproductive System Disease	Plasma Membrane	G-protein coupled receptor	G-Protein Coupled Receptor Signaling,Gαq Signaling	Human,Mouse,Rat	Adrenal Gland,Amygdala,Bladder,Brain,Brainstem,Cells not otherwise specified,Cerebral Cortex,Cerebral Ventricles,Choroid Plexus,Dorsal Root Ganglion,Granule Cell Layer,Gray Matter,Heart,Hepatocytes,Hippocampus,Hypothalamus,Kidney,Liver,Lung,Medulla Oblongata,Neurons not otherwise specified,Olfactory Bulb,Other Cells,Other Nervous System,Other Neurons,Other Tissues and Primary Cells,Pancreas,Pitui…
rno-miR-141-3p	TargetScan Human	High (predicted)	BACE1	beta-site APP-cleaving enzyme 1	Cancer,Developmental Disorder,Gastrointestinal Disease,Hepatic System Disease,Hereditary Disorder,Metabolic Disease,Neurological Disease,Nutritional Disease,Ophthalmic Disease,Organismal Injury and Abnormalities,Psychological Disorders	Cytoplasm	peptidase	Amyloid Processing,Mitochondrial Dysfunction	Human,Mouse,Rat	Adipose,Amygdala,B lymphocytes not otherwise specified,Bladder,Brain,Brainstem,Caudate Nucleus,Cerebellum,Cerebral Cortex,Corpus Callosum,Cortical neurons,Cytotoxic T cells,Dorsal Root Ganglion,Epidermis,Granule Cell Layer,Heart,Hippocampus,Hypothalamus,Immune cells not otherwise specified,Kidney,Large Intestine,Lens,Liver,Lung,Mammary Gland,Medulla Oblongata,Neurons not otherwise specified,Olfac…
rno-miR-141-3p	TargetScan Human,miRecords	Experimentally Observed,High (predicted)	BAP1	BRCA1 associated protein-1 (ubiquitin carboxy-terminal hydrolase)	Cancer,Developmental Disorder,Endocrine System Disorders,Gastrointestinal Disease,Hereditary Disorder,Neurological Disease,Organismal Injury and Abnormalities,Renal and Urological Disease,Reproductive System Disease,Respiratory Disease	Nucleus	peptidase	Protein Ubiquitination Pathway	Human,Mouse,Rat	Activated helper T cells,Activated Vd1 Gamma-delta T cells,Activated Vd2 Gamma-delta T cells,Adipose,Amygdala,B lymphocytes not otherwise specified,BDCA-1+ dendritic cells,BDCA-3+ dendritic cells,Bladder,Brain,Central memory cytotoxic T cells,Central memory helper T cells,Cerebellum,Cerebral Cortex,Cytotoxic T cells,Dorsal Root Ganglion,Effector memory cytotoxic T cells,Effector memory RA+ cytoto…
rno-miR-141-3p	TargetScan Human	Moderate (predicted)	BCL9	B-cell CLL/lymphoma 9	Cancer,Endocrine System Disorders,Gastrointestinal Disease,Infectious Disease,Reproductive System Disease	Nucleus	other	Regulation of the Epithelial-Mesenchymal Transition Pathway,Wnt/β-catenin Signaling	Human,Mouse,Rat	Activated CD56dim NK cells,Activated Vd1 Gamma-delta T cells,Activated Vd2 Gamma-delta T cells,Adipose,Amygdala,B lymphocytes not otherwise specified,Bladder,CD56bright NK cells,Cerebellum,Cerebral Cortex,Cytotoxic T cells,Dorsal Root Ganglion,Effector T cells,Epidermis,Heart,Hippocampus,Hypothalamus,Immature monocyte-derived dendritic cells,Kidney,Large Intestine,Liver,Lung,Mammary Gland,Monocyt…
rno-miR-141-3p	TargetScan Human	High (predicted)	CALCR	calcitonin receptor	Cancer,Connective Tissue Disorders,Developmental Disorder,Endocrine System Disorders,Gastrointestinal Disease,Hematological Disease,Immunological Disease,Metabolic Disease,Organismal Injury and Abnormalities,Skeletal and Muscular Disorders	Plasma Membrane	G-protein coupled receptor	G-Protein Coupled Receptor Signaling,Gαq Signaling,Role of Osteoblasts, Osteoclasts and Chondrocytes in Rheumatoid Arthritis	Human,Mouse,Rat	Adipocytes,Adipose,Brain,Calvaria,Cartilage Tissue,Caudate Nucleus,Chondrocytes,Hypothalamus,Kidney,Lung,Mesenchymal stem cells,Nervous System not otherwise specified,Oocytes,Other Cells,Other Nervous System,Other Neurons,Other Organ Systems,Ovary,Pancreas,Pituitary Gland,Skeletal Muscle,Striatum,Breast Cancer Cell Lines not otherwise specified,MCF7,Other Cell Line,Other Leukemia Cell Lines,Other…
rno-miR-141-3p	TargetScan Human	High (predicted)	CANX	calnexin	Cancer,Developmental Disorder,Gastrointestinal Disease,Hereditary Disorder,Inflammatory Disease,Metabolic Disease,Neurological Disease,Psychological Disorders,Skeletal and Muscular Disorders	Cytoplasm	other	Antigen Presentation Pathway,Lipid Antigen Presentation by CD1,Unfolded protein response	Human,Mouse,Rat	Adipose,Amygdala,B lymphocytes not otherwise specified,BDCA-1+ dendritic cells,BDCA-3+ dendritic cells,Bladder,Central memory cytotoxic T cells,Cerebellum,Cerebral Cortex,Cytotoxic T cells,Dendritic cells not otherwise specified,Dorsal Root Ganglion,Effector memory cytotoxic T cells,Effector memory RA+ cytotoxic T cells,Effector T cells,Epidermis,Heart,Hippocampus,Hypothalamus,Immature monocyte-d…
rno-miR-141-3p	TargetScan Human	High (predicted)	CCDC6	coiled-coil domain containing 6	Cancer,Endocrine System Disorders,Gastrointestinal Disease,Organismal Injury and Abnormalities,Reproductive System Disease	Cytoplasm	other		Human,Mouse,Rat	Activated CD56bright NK cells,Activated CD56dim NK cells,Activated helper T cells,Activated Vd1 Gamma-delta T cells,Activated Vd2 Gamma-delta T cells,Adipose,Amygdala,B lymphocytes not otherwise specified,BDCA-1+ dendritic cells,BDCA-3+ dendritic cells,Bladder,CD56dim NK cells,Central memory cytotoxic T cells,Central memory helper T cells,Cerebellum,Cerebral Cortex,Cytotoxic T cells,Dorsal Root G…
rno-miR-141-3p	TargetScan Human	High (predicted)	CCDC80	coiled-coil domain containing 80	Cancer,Endocrine System Disorders,Gastrointestinal Disease,Hepatic System Disease,Nutritional Disease	Nucleus	other		Human,Mouse,Rat	Adipocytes,Adipose,Amygdala,Bladder,Brain,Cerebellum,Cerebral Cortex,Dorsal Root Ganglion,Epidermis,Heart,Hypothalamus,Kidney,Large Intestine,Liver,Lung,Mammary Gland,Olfactory Bulb,Other Organ Systems,Ovary,Pancreas,Pituitary Gland,Placenta,Prostate Gland,Retina,Salivary Gland,Skeletal Muscle,Small Intestine,Spleen,Stomach,Thymus,Uterus,A498,ACHN,BT-549,CAKI-1,HeLa,HS 578T,LOX IMVI,NCI-ADR-RES,N…
rno-miR-141-3p	TargetScan Human	Moderate (predicted)	CCDC85A	coiled-coil domain containing 85A	Cancer,Cardiovascular Disease,Endocrine System Disorders,Gastrointestinal Disease,Organismal Injury and Abnormalities,Reproductive System Disease	Other	other		Human,Mouse,Rat	Adipose,Amygdala,Cerebellum,Cerebral Cortex,Dorsal Root Ganglion,Epidermis,Heart,Hippocampus,Hypothalamus,Large Intestine,Lung,Mammary Gland,Olfactory Bulb,Pancreas,Pituitary Gland,Placenta,Stomach,Substantia Nigra,Thymus,EKVX
rno-miR-141-3p	TargetScan Human	High (predicted)	CCND2	cyclin D2	Cancer,Connective Tissue Disorders,Dermatological Diseases and Conditions,Developmental Disorder,Endocrine System Disorders,Gastrointestinal Disease,Hematological Disease,Hereditary Disorder,Immunological Disease,Metabolic Disease,Neurological Disease,Ophthalmic Disease,Organismal Injury and Abnormalities,Psychological Disorders,Renal and Urological Disease,Reproductive System Disease,Skeletal an…	Nucleus	other	Aryl Hydrocarbon Receptor Signaling,Cell Cycle: G1/S Checkpoint Regulation,Cyclins and Cell Cycle Regulation,GADD45 Signaling,IL-8 Signaling,Molecular Mechanisms of Cancer,p53 Signaling	Human,Mouse,Rat	B lymphocytes not otherwise specified,Bone marrow-derived macrophages,Brain,Cerebellum,Cerebral Cortex,Dermis,Embryonic stem cells,Fibroblasts,Granule cells,Granulosa cells,Hematopoietic progenitor cells,Hippocampus,Keratinocytes,Lung,Lymphocytes not otherwise specified,Mammary Gland,Memory B cells,Murine NKT cells,Naive B cells,Neurons not otherwise specified,Other B lymphocytes,Other Cells,Othe…
rno-miR-141-3p	TargetScan Human	Moderate (predicted)	CCNG1	cyclin G1	Cancer,Endocrine System Disorders,Gastrointestinal Disease,Hepatic System Disease,Metabolic Disease,Organismal Injury and Abnormalities,Reproductive System Disease,Tumor Morphology	Nucleus	other	p53 Signaling	Human,Mouse,Rat	Adipose,Amygdala,B lymphocytes not otherwise specified,Bladder,Cerebellum,Cerebral Cortex,Cytotoxic T cells,Dorsal Root Ganglion,Effector T cells,Epidermis,Heart,Hippocampus,Hypothalamus,Kidney,Large Intestine,Liver,Lung,Mammary Gland,Murine NKT cells,Olfactory Bulb,Ovary,Pancreas,Pituitary Gland,Placenta,Prostate Gland,Retina,Salivary Gland,Skeletal Muscle,Small Intestine,Spleen,Stomach,Substant…
rno-miR-141-3p	TargetScan Human	Moderate (predicted)	CD274	CD274 molecule	Auditory Disease,Cancer,Cardiovascular Disease,Connective Tissue Disorders,Endocrine System Disorders,Gastrointestinal Disease,Hematological Disease,Hepatic System Disease,Immunological Disease,Infectious Disease,Inflammatory Disease,Inflammatory Response,Metabolic Disease,Neurological Disease,Nutritional Disease,Organismal Injury and Abnormalities,Reproductive System Disease,Respiratory Disease,…	Plasma Membrane	enzyme		Human,Mouse,Rat	Adipose,B lymphocytes not otherwise specified,Bone marrow-derived dendritic cells,Cardiomyocytes,Central memory cytotoxic T cells,Cytotoxic T cells,Dendritic cells not otherwise specified,Dermis,Dorsal Root Ganglion,Effector memory cytotoxic T cells,Effector memory RA+ cytotoxic T cells,Effector T cells,Endothelial cells not otherwise specified,Epidermis,Epithelial cells not otherwise specified,H…
rno-miR-141-3p	TargetScan Human	Moderate (predicted)	CD2AP	CD2-associated protein	Cancer,Developmental Disorder,Gastrointestinal Disease,Hematological Disease,Hepatic System Disease,Hereditary Disorder,Immunological Disease,Metabolic Disease,Neurological Disease,Organismal Injury and Abnormalities,Psychological Disorders,Renal and Urological Disease	Cytoplasm	other	Clathrin-mediated Endocytosis Signaling	Human,Mouse,Rat	Activated CD56bright NK cells,Activated CD56dim NK cells,Activated helper T cells,Activated Vd1 Gamma-delta T cells,Activated Vd2 Gamma-delta T cells,Adipose,Amygdala,B lymphocytes not otherwise specified,BDCA-1+ dendritic cells,BDCA-3+ dendritic cells,Bladder,Central memory cytotoxic T cells,Central memory helper T cells,Cerebellum,Cytotoxic T cells,Dorsal Root Ganglion,Effector memory cytotoxic…
rno-miR-141-3p	TargetScan Human	High (predicted)	CD47	CD47 molecule	Cancer,Cardiovascular Disease,Connective Tissue Disorders,Dermatological Diseases and Conditions,Developmental Disorder,Gastrointestinal Disease,Hematological Disease,Hepatic System Disease,Hereditary Disorder,Hypersensitivity Response,Immunological Disease,Infectious Disease,Inflammatory Disease,Inflammatory Response,Metabolic Disease,Neurological Disease,Organismal Injury and Abnormalities,Resp…	Plasma Membrane	transmembrane receptor	Inhibition of Angiogenesis by TSP1	Human,Mouse,Rat	Activated helper T cells,Activated Vd1 Gamma-delta T cells,Adipose,Amygdala,Astrocytes,B lymphocytes not otherwise specified,BDCA-1+ dendritic cells,BDCA-3+ dendritic cells,Bladder,Blood platelets,Central memory cytotoxic T cells,Cerebellum,Cerebral Cortex,Cytotoxic T cells,Dorsal Root Ganglion,Effector memory cytotoxic T cells,Effector memory RA+ cytotoxic T cells,Effector T cells,Epidermis,Hear…
rno-miR-141-3p	TargetScan Human	Moderate (predicted)	CD97	CD97 molecule	Cancer,Cardiovascular Disease,Connective Tissue Disorders,Dermatological Diseases and Conditions,Endocrine System Disorders,Gastrointestinal Disease,Immunological Disease,Infectious Disease,Inflammatory Disease,Inflammatory Response,Organismal Injury and Abnormalities,Reproductive System Disease,Skeletal and Muscular Disorders,Tumor Morphology	Plasma Membrane	G-protein coupled receptor		Human,Mouse,Rat	Adipose,B lymphocytes not otherwise specified,Bladder,Brain,Cerebellum,Cytotoxic T cells,Dorsal Root Ganglion,Effector T cells,Epidermis,Heart,Hypothalamus,Kidney,Large Intestine,Lung,Macrophages not otherwise specified,Memory B cells,Murine NKT cells,Naive B cells,Other Immune cells,Other Macrophages,Other Nervous System,Other Neurons,Ovary,Pituitary Gland,Prostate Gland,Retina,Skeletal Muscle,S…
rno-miR-141-3p	TargetScan Human	Moderate (predicted)	CEP57	centrosomal protein 57kDa	Cancer,Developmental Disorder,Hereditary Disorder,Organismal Injury and Abnormalities,Reproductive System Disease	Cytoplasm	other		Human,Mouse,Rat	Adipose,Amygdala,B lymphocytes not otherwise specified,Bladder,Cerebellum,Cerebral Cortex,Cytotoxic T cells,Dorsal Root Ganglion,Effector T cells,Epidermis,Heart,Hypothalamus,Kidney,Large Intestine,Lung,Mammary Gland,Memory B cells,Naive B cells,Olfactory Bulb,Ovary,Pituitary Gland,Placenta,Prostate Gland,Retina,Salivary Gland,Skeletal Muscle,Spleen,Stomach,Substantia Nigra,Testis,Thymus,Uterus,7…
rno-miR-141-3p	TargetScan Human	High (predicted)	CHKA	choline kinase alpha	Cancer,Endocrine System Disorders,Gastrointestinal Disease,Organismal Injury and Abnormalities,Reproductive System Disease	Cytoplasm	kinase	Phosphatidylcholine Biosynthesis I,Phosphatidylethanolamine Biosynthesis II	Human,Mouse,Rat	Adipose,Amygdala,B lymphocytes not otherwise specified,Bladder,Cerebellum,Cerebral Cortex,Cytotoxic T cells,Dorsal Root Ganglion,Effector T cells,Epidermis,Heart,Hippocampus,Hypothalamus,Kidney,Large Intestine,Liver,Lung,Mammary Gland,Olfactory Bulb,Ovary,Pancreas,Pituitary Gland,Placenta,Prostate Gland,Retina,Salivary Gland,Skeletal Muscle,Small Intestine,Spleen,Stomach,Substantia Nigra,Testis,T…
rno-miR-141-3p	TargetScan Human	High (predicted)	CHP1	calcineurin-like EF-hand protein 1	Endocrine System Disorders,Gastrointestinal Disease,Metabolic Disease	Cytoplasm	transporter	Axonal Guidance Signaling,Calcium Signaling,Calcium-induced T Lymphocyte Apoptosis,Cardiac Hypertrophy Signaling,CD28 Signaling in T Helper Cells,Clathrin-mediated Endocytosis Signaling,Dopamine-DARPP32 Feedback in cAMP Signaling,fMLP Signaling in Neutrophils,Glucocorticoid Receptor Signaling,Gαq Signaling,iCOS-iCOSL Signaling in T Helper Cells,IL-3 Signaling,Netrin Signaling,nNOS Signaling in Ne…	Human,Mouse,Rat	Adipose,Amygdala,B lymphocytes not otherwise specified,Bladder,Brain,Cerebellum,Cerebral Cortex,Cytotoxic T cells,Dorsal Root Ganglion,Effector T cells,Epidermis,Heart,Hippocampus,Hypothalamus,Kidney,Large Intestine,Liver,Lung,Mammary Gland,Murine NKT cells,Naive B cells,Olfactory Bulb,Ovary,Pancreas,Pituitary Gland,Placenta,Prostate Gland,Retina,Salivary Gland,Skeletal Muscle,Small Intestine,Spl…
rno-miR-141-3p	TargetScan Human	High (predicted)	CLASP2	cytoplasmic linker associated protein 2	Cancer,Endocrine System Disorders,Gastrointestinal Disease,Hepatic System Disease	Cytoplasm	other		Human,Mouse,Rat	Activated CD56bright NK cells,Activated CD56dim NK cells,Activated helper T cells,Activated Vd1 Gamma-delta T cells,Activated Vd2 Gamma-delta T cells,Adipose,Amygdala,BDCA-1+ dendritic cells,BDCA-3+ dendritic cells,CD56bright NK cells,CD56dim NK cells,Central memory cytotoxic T cells,Central memory helper T cells,Cerebellum,Cerebral Cortex,Cytotoxic T cells,Dorsal Root Ganglion,Effector memory cy…
rno-miR-141-3p	TargetScan Human	High (predicted)	CLCN5	chloride channel, voltage-sensitive 5	Cancer,Connective Tissue Disorders,Developmental Disorder,Endocrine System Disorders,Gastrointestinal Disease,Hematological Disease,Hepatic System Disease,Hereditary Disorder,Metabolic Disease,Neurological Disease,Nutritional Disease,Organismal Injury and Abnormalities,Renal and Urological Disease,Reproductive System Disease,Skeletal and Muscular Disorders	Plasma Membrane	ion channel		Human,Mouse,Rat	Activated helper T cells,Activated Vd1 Gamma-delta T cells,Adipose,Amygdala,B lymphocytes not otherwise specified,BDCA-1+ dendritic cells,BDCA-3+ dendritic cells,Bladder,Brain,CD56bright NK cells,CD56dim NK cells,Central memory cytotoxic T cells,Central memory helper T cells,Cerebellum,Cerebral Cortex,Cytotoxic T cells,Dorsal Root Ganglion,Effector memory cytotoxic T cells,Effector memory helper …
rno-miR-141-3p	TargetScan Human	High (predicted)	CLIC5	chloride intracellular channel 5	Cancer,Cardiovascular Disease,Endocrine System Disorders,Gastrointestinal Disease,Hepatic System Disease,Metabolic Disease,Organismal Injury and Abnormalities	Cytoplasm	ion channel		Human,Mouse,Rat	Activated CD56bright NK cells,Activated Vd1 Gamma-delta T cells,Activated Vd2 Gamma-delta T cells,Adipose,Amygdala,B lymphocytes not otherwise specified,Bladder,Central memory cytotoxic T cells,Central memory helper T cells,Cerebellum,Cerebral Cortex,Cytotoxic T cells,Dorsal Root Ganglion,Effector memory cytotoxic T cells,Effector memory helper T cells,Effector memory RA+ cytotoxic T cells,Effect…
rno-miR-141-3p	TargetScan Human	High (predicted)	CNBP	CCHC-type zinc finger, nucleic acid binding protein	Developmental Disorder,Hereditary Disorder,Skeletal and Muscular Disorders	Nucleus	transcription regulator		Human,Mouse,Rat	Adipose,Amygdala,B lymphocytes not otherwise specified,Bladder,Cerebellum,Cerebral Cortex,Cytotoxic T cells,Dorsal Root Ganglion,Effector T cells,Epidermis,Heart,Hippocampus,Hypothalamus,Kidney,Large Intestine,Liver,Lung,Mammary Gland,Memory B cells,Naive B cells,Olfactory Bulb,Ovary,Pancreas,Pituitary Gland,Placenta,Prostate Gland,Retina,Salivary Gland,Skeletal Muscle,Small Intestine,Spleen,Stom…
rno-miR-141-3p	TargetScan Human	High (predicted)	COQ7	coenzyme Q7 homolog, ubiquinone (yeast)	Cancer,Developmental Disorder,Neurological Disease,Psychological Disorders,Respiratory Disease	Cytoplasm	enzyme		Human,Mouse,Rat	Adipose,Amygdala,B lymphocytes not otherwise specified,Bladder,Brain,Cerebellum,Dorsal Root Ganglion,Epidermis,Heart,Hippocampus,Hypothalamus,Kidney,Large Intestine,Liver,Lung,Memory B cells,Murine NKT cells,Olfactory Bulb,Other Organ Systems,Ovary,Pituitary Gland,Plasmacytoid dendritic cells,Prostate Gland,Retina,Skeletal Muscle,Small Intestine,Stomach,Substantia Nigra,Testis,Thymus,Uterus,Vd1 G…
rno-miR-141-3p	TargetScan Human	High (predicted)	CSNK1E	casein kinase 1, epsilon	Cancer,Developmental Disorder,Gastrointestinal Disease,Hematological Disease,Hepatic System Disease,Immunological Disease,Organismal Injury and Abnormalities,Renal and Urological Disease,Reproductive System Disease	Cytoplasm	kinase	Amyloid Processing,Circadian Rhythm Signaling,Dopamine-DARPP32 Feedback in cAMP Signaling,Gap Junction Signaling,HIPPO signaling,Role of NFAT in Regulation of the Immune Response,Role of Wnt/GSK-3β Signaling in the Pathogenesis of Influenza,Wnt/β-catenin Signaling	Human,Mouse,Rat	Activated CD56bright NK cells,Activated helper T cells,Activated Vd1 Gamma-delta T cells,Activated Vd2 Gamma-delta T cells,Adipose,Amygdala,BDCA-1+ dendritic cells,BDCA-3+ dendritic cells,Bladder,Central memory cytotoxic T cells,Central memory helper T cells,Cerebellum,Cerebral Cortex,Dorsal Root Ganglion,Effector memory cytotoxic T cells,Effector memory helper T cells,Effector memory RA+ cytotox…
rno-miR-141-3p	TargetScan Human	Moderate (predicted)	CSTA	cystatin A (stefin A)	Cancer,Dermatological Diseases and Conditions,Developmental Disorder,Gastrointestinal Disease,Hereditary Disorder,Inflammatory Response,Organismal Injury and Abnormalities	Cytoplasm	other		Human,Mouse,Rat	Activated CD56bright NK cells,Amygdala,B lymphocytes not otherwise specified,BDCA-1+ dendritic cells,BDCA-3+ dendritic cells,Bladder,Cerebellum,Cytotoxic T cells,Dendritic cells not otherwise specified,Dermis,Effector T cells,Epidermis,Heart,Hippocampus,Hypothalamus,Immature monocyte-derived dendritic cells,Keratinocytes,Kidney,Large Intestine,Liver,Lung,Mature monocyte-derived dendritic cells,Mo…
rno-miR-141-3p	Ingenuity Expert Findings,TargetScan Human	Experimentally Observed,High (predicted)	CTBP2	C-terminal binding protein 2	Cancer,Endocrine System Disorders,Gastrointestinal Disease,Hematological Disease,Immunological Disease,Infectious Disease,Organismal Injury and Abnormalities,Reproductive System Disease,Tumor Morphology	Nucleus	transcription regulator	Adipogenesis pathway,Chronic Myeloid Leukemia Signaling,Estrogen Receptor Signaling	Human,Mouse,Rat	Activated CD56bright NK cells,Activated CD56dim NK cells,Activated Vd1 Gamma-delta T cells,Activated Vd2 Gamma-delta T cells,Adipose,Amygdala,BDCA-1+ dendritic cells,BDCA-3+ dendritic cells,Bladder,CD56bright NK cells,CD56dim NK cells,Central memory helper T cells,Cerebellum,Cerebral Cortex,Cytotoxic T cells,Dorsal Root Ganglion,Effector memory RA+ cytotoxic T cells,Epidermis,Heart,Hippocampus,Hy…
rno-miR-141-3p	miRecords	Experimentally Observed	CTNNB1	catenin (cadherin-associated protein), beta 1, 88kDa	Cancer,Cardiovascular Disease,Connective Tissue Disorders,Dental Disease,Dermatological Diseases and Conditions,Developmental Disorder,Endocrine System Disorders,Gastrointestinal Disease,Hematological Disease,Hepatic System Disease,Hereditary Disorder,Immunological Disease,Infectious Disease,Inflammatory Disease,Metabolic Disease,Neurological Disease,Organismal Injury and Abnormalities,Psychologi…	Nucleus	transcription regulator	Basal Cell Carcinoma Signaling,Colorectal Cancer Metastasis Signaling,Endometrial Cancer Signaling,Ephrin B Signaling,Epithelial Adherens Junction Signaling,Factors Promoting Cardiogenesis in Vertebrates,Gap Junction Signaling,Germ Cell-Sertoli Cell Junction Signaling,Glioblastoma Multiforme Signaling,Gα12/13 Signaling,Human Embryonic Stem Cell Pluripotency,ILK Signaling,Leukocyte Extravasation S…	Human,Mouse,Rat	Activated CD56dim NK cells,Activated helper T cells,Activated Vd1 Gamma-delta T cells,Activated Vd2 Gamma-delta T cells,Adipose,Amygdala,B lymphocytes not otherwise specified,BDCA-1+ dendritic cells,BDCA-3+ dendritic cells,Bladder,Brain,CD56bright NK cells,CD56dim NK cells,Cells not otherwise specified,Central memory cytotoxic T cells,Central memory helper T cells,Cerebellum,Cerebral Cortex,Cytot…
rno-miR-141-3p	TargetScan Human	High (predicted)	CXADR	coxsackie virus and adenovirus receptor	Antimicrobial Response,Cancer,Cardiovascular Disease,Endocrine System Disorders,Gastrointestinal Disease,Hematological Disease,Hepatic System Disease,Immunological Disease,Infectious Disease,Inflammatory Response,Metabolic Disease,Organismal Injury and Abnormalities,Renal and Urological Disease,Reproductive System Disease,Respiratory Disease	Plasma Membrane	transmembrane receptor	Virus Entry via Endocytic Pathways	Human,Mouse,Rat	Activated helper T cells,Activated Vd1 Gamma-delta T cells,Activated Vd2 Gamma-delta T cells,Adipose,Amygdala,Bladder,Blood platelets,Brain,Cardiomyocytes,CD56bright NK cells,CD56dim NK cells,Central memory cytotoxic T cells,Central memory helper T cells,Cerebellum,Cerebral Cortex,Cytotoxic T cells,Dorsal Root Ganglion,Effector memory cytotoxic T cells,Effector T cells,Endothelial cells not other…
rno-miR-141-3p	TargetScan Human	High (predicted)	CXCL12	chemokine (C-X-C motif) ligand 12	Antimicrobial Response,Cancer,Cardiovascular Disease,Connective Tissue Disorders,Dermatological Diseases and Conditions,Developmental Disorder,Gastrointestinal Disease,Hematological Disease,Hepatic System Disease,Hypersensitivity Response,Immunological Disease,Infectious Disease,Inflammatory Disease,Inflammatory Response,Metabolic Disease,Neurological Disease,Ophthalmic Disease,Organismal Injury …	Extracellular Space	cytokine	Agranulocyte Adhesion and Diapedesis,Atherosclerosis Signaling,Axonal Guidance Signaling,Chemokine Signaling,CXCR4 Signaling,Ephrin B Signaling,Ephrin Receptor Signaling,Granulocyte Adhesion and Diapedesis,Leukocyte Extravasation Signaling,Role of Macrophages, Fibroblasts and Endothelial Cells in Rheumatoid Arthritis	Human,Mouse,Rat	Activated helper T cells,Activated Vd1 Gamma-delta T cells,Activated Vd2 Gamma-delta T cells,Adipocytes,Adipose,Adrenal Gland,Amygdala,Astrocytes,B lymphocytes not otherwise specified,BDCA-3+ dendritic cells,Bladder,Bone marrow cells not otherwise specified,Brain,Cartilage Tissue,CD56bright NK cells,CD56dim NK cells,Central memory cytotoxic T cells,Cerebellum,Cerebral Cortex,Cerebral Ventricles,C…
rno-miR-141-3p	TargetScan Human	High (predicted)	CYCS	cytochrome c, somatic	Cancer,Cardiovascular Disease,Connective Tissue Disorders,Dermatological Diseases and Conditions,Developmental Disorder,Hematological Disease,Hereditary Disorder,Infectious Disease,Inflammatory Response,Neurological Disease,Organismal Injury and Abnormalities,Psychological Disorders,Reproductive System Disease,Respiratory Disease,Skeletal and Muscular Disorders,Tumor Morphology	Cytoplasm	transporter	Amyotrophic Lateral Sclerosis Signaling,Apoptosis Signaling,CD27 Signaling in Lymphocytes,Ceramide Signaling,Cytotoxic T Lymphocyte-mediated Apoptosis of Target Cells,Death Receptor Signaling,Docosahexaenoic Acid (DHA) Signaling,Granzyme B Signaling,Huntington's Disease Signaling,Induction of Apoptosis by HIV1,Lymphotoxin β Receptor Signaling,Mitochondrial Dysfunction,Molecular Mechanisms of Canc…	Human,Mouse,Rat	Activated CD56bright NK cells,Activated CD56dim NK cells,Activated helper T cells,Activated Vd1 Gamma-delta T cells,Activated Vd2 Gamma-delta T cells,Adipose,Amygdala,B lymphocytes not otherwise specified,BDCA-1+ dendritic cells,BDCA-3+ dendritic cells,Bladder,Blood platelets,Brain,CD56bright NK cells,CD56dim NK cells,Central memory cytotoxic T cells,Central memory helper T cells,Cerebellum,Cereb…
rno-miR-141-3p	TargetScan Human	High (predicted)	CYP26B1	cytochrome P450, family 26, subfamily B, polypeptide 1	Cancer,Cardiovascular Disease,Connective Tissue Disorders,Dental Disease,Developmental Disorder,Gastrointestinal Disease,Hereditary Disorder,Neurological Disease,Ophthalmic Disease,Psychological Disorders,Respiratory Disease,Skeletal and Muscular Disorders	Cytoplasm	enzyme		Human,Mouse,Rat	Adipose,Amygdala,Cerebellum,Cerebral Cortex,Cytotoxic T cells,Dorsal Root Ganglion,Effector T cells,Epidermis,Hippocampus,HUVEC cells,Hypothalamus,Kidney,Large Intestine,Liver,Other Cells,Other Organ Systems,Other Tissues and Primary Cells,Ovary,Pituitary Gland,Placenta,Retina,Sertoli cells,Skeletal Muscle,Smooth Muscle,Spleen,Substantia Nigra,T lymphocytes not otherwise specified,Testis,Thymus,V…
rno-miR-141-3p	TargetScan Human	High (predicted)	DAPK1	death-associated protein kinase 1	Cancer,Endocrine System Disorders,Gastrointestinal Disease,Hepatic System Disease,Organismal Injury and Abnormalities,Reproductive System Disease,Respiratory Disease,Tumor Morphology	Cytoplasm	kinase	Bladder Cancer Signaling,Pyridoxal 5'-phosphate Salvage Pathway,Salvage Pathways of Pyrimidine Ribonucleotides	Human,Mouse,Rat	Activated CD56dim NK cells,Activated helper T cells,Activated Vd1 Gamma-delta T cells,Activated Vd2 Gamma-delta T cells,Adipose,Amygdala,BDCA-1+ dendritic cells,BDCA-3+ dendritic cells,Bladder,Brain,CD56dim NK cells,Cerebellum,Cerebral Cortex,Cytotoxic T cells,Dorsal Root Ganglion,Effector T cells,Epidermis,Granule cells,Heart,Hippocampus,Hypothalamus,Immature monocyte-derived dendritic cells,Kid…
rno-miR-141-3p	TargetScan Human	High (predicted)	DCX	doublecortin	Cancer,Developmental Disorder,Gastrointestinal Disease,Hepatic System Disease,Hereditary Disorder,Metabolic Disease,Neurological Disease,Organismal Injury and Abnormalities,Psychological Disorders,Reproductive System Disease,Skeletal and Muscular Disorders	Cytoplasm	other	Reelin Signaling in Neurons	Human,Mouse,Rat	Adipose,Amygdala,Brain,Cells not otherwise specified,Cerebellum,Cerebral Cortex,Dorsal Root Ganglion,Effector T cells,Granule cells,Hippocampus,Hypothalamus,Large Intestine,Liver,Lung,Neurons not otherwise specified,Olfactory Bulb,Other Cells,Other Nervous System,Other Neurons,Other Stem cells,Other Tissues and Primary Cells,Pituitary Gland,Retina,Salivary Gland,Small Intestine,Substantia Nigra,S…
rno-miR-141-3p	TargetScan Human	Moderate (predicted)	DDOST	dolichyl-diphosphooligosaccharide--protein glycosyltransferase subunit (non-catalytic)	Developmental Disorder,Hereditary Disorder,Infectious Disease,Inflammatory Response,Metabolic Disease,Reproductive System Disease	Cytoplasm	enzyme		Human,Mouse,Rat	Heart,Kidney,Memory B cells,Murine NKT cells,Naive B cells,Pancreas,Pituitary Gland,Prostate Gland,786-0,A498,A549-ATCC,ACHN,BT-549,CAKI-1,CCRF-CEM,COLO205,DU-145,EKVX,H460,HCC-2998,HCT-116,HCT-15,HL-60,HOP-62,HOP-92,HS 578T,HT29,IGROV1,J774,K-562,KM-12,LOX IMVI,M14,MALME-3M,MCF7,MDA-MB-231,MDA-MB-435,MDA-N,MOLT-4,NCI-ADR-RES,NCI-H226,NCI-H23,NCI-H332M,NCI-H522,OVCAR-3,OVCAR-4,OVCAR-5,OVCAR-8,PC-…
rno-miR-141-3p	TargetScan Human	High (predicted)	DIP2B	DIP2 disco-interacting protein 2 homolog B (Drosophila)	Cancer,Developmental Disorder,Endocrine System Disorders,Gastrointestinal Disease,Hepatic System Disease,Hereditary Disorder,Neurological Disease	Cytoplasm	other		Human,Mouse,Rat	Activated helper T cells,Adipose,Amygdala,B lymphocytes not otherwise specified,BDCA-1+ dendritic cells,BDCA-3+ dendritic cells,Bladder,Central memory cytotoxic T cells,Cerebellum,Cerebral Cortex,Cytotoxic T cells,Dorsal Root Ganglion,Effector memory cytotoxic T cells,Effector memory RA+ cytotoxic T cells,Effector T cells,Epidermis,Heart,Hippocampus,Hypothalamus,Immature monocyte-derived dendriti…
rno-miR-141-3p	TargetScan Human	Moderate (predicted)	DLAT	dihydrolipoamide S-acetyltransferase	Cancer,Endocrine System Disorders,Gastrointestinal Disease,Hepatic System Disease,Hereditary Disorder,Metabolic Disease,Neurological Disease,Psychological Disorders	Cytoplasm	enzyme	Acetyl-CoA Biosynthesis I (Pyruvate Dehydrogenase Complex)	Human,Mouse,Rat	Activated CD56bright NK cells,Activated helper T cells,Activated Vd1 Gamma-delta T cells,Activated Vd2 Gamma-delta T cells,Adipose,Amygdala,B lymphocytes not otherwise specified,BDCA-1+ dendritic cells,BDCA-3+ dendritic cells,Bladder,Central memory cytotoxic T cells,Central memory helper T cells,Cerebellum,Cerebral Cortex,Cytotoxic T cells,Dorsal Root Ganglion,Effector memory cytotoxic T cells,Ef…
rno-miR-141-3p	TargetScan Human	High (predicted)	DLG3	discs, large homolog 3 (Drosophila)	Cancer,Developmental Disorder,Gastrointestinal Disease,Hepatic System Disease,Hereditary Disorder,Neurological Disease,Organismal Injury and Abnormalities,Psychological Disorders,Reproductive System Disease	Plasma Membrane	kinase	HIPPO signaling	Human,Mouse,Rat	Activated CD56bright NK cells,Activated CD56dim NK cells,Activated helper T cells,Activated Vd1 Gamma-delta T cells,Activated Vd2 Gamma-delta T cells,Adipose,Amygdala,B lymphocytes not otherwise specified,BDCA-3+ dendritic cells,Bladder,Brain,CD56bright NK cells,CD56dim NK cells,Cells not otherwise specified,Central memory cytotoxic T cells,Central memory helper T cells,Cerebellum,Cerebral Cortex…
rno-miR-141-3p	TargetScan Human	High (predicted)	DMWD	dystrophia myotonica, WD repeat containing	Cancer,Endocrine System Disorders,Organismal Injury and Abnormalities,Reproductive System Disease	Nucleus	other		Human,Mouse,Rat	Activated helper T cells,Activated Vd1 Gamma-delta T cells,Activated Vd2 Gamma-delta T cells,Adipose,Amygdala,B lymphocytes not otherwise specified,BDCA-1+ dendritic cells,BDCA-3+ dendritic cells,Bladder,CD56bright NK cells,CD56dim NK cells,Central memory helper T cells,Cerebellum,Cerebral Cortex,Cytotoxic T cells,Dorsal Root Ganglion,Effector memory cytotoxic T cells,Effector memory helper T cel…
rno-miR-141-3p	TargetScan Human	High (predicted)	DRD2	dopamine receptor D2	Cancer,Cardiovascular Disease,Connective Tissue Disorders,Dermatological Diseases and Conditions,Developmental Disorder,Endocrine System Disorders,Gastrointestinal Disease,Hematological Disease,Hepatic System Disease,Hereditary Disorder,Immunological Disease,Infectious Disease,Inflammatory Disease,Inflammatory Response,Metabolic Disease,Neurological Disease,Nutritional Disease,Ophthalmic Disease,…	Plasma Membrane	G-protein coupled receptor	cAMP-mediated signaling,Dopamine Receptor Signaling,Dopamine-DARPP32 Feedback in cAMP Signaling,G-Protein Coupled Receptor Signaling,Gap Junction Signaling,Gαi Signaling	Human,Mouse,Rat	Adipose,Adrenal Gland,Amygdala,Brain,Brainstem,Cells not otherwise specified,Cerebellum,Cerebral Cortex,Dorsal Root Ganglion,Epidermis,Gray Matter,Heart,Hippocampus,Hypothalamus,Kidney,Large Intestine,Medulla Oblongata,Microvascular endothelial cells,Neurons not otherwise specified,NK cells not otherwise specified,Nucleus Accumbens,Olfactory Bulb,Other Cells,Other Nervous System,Other Neurons,Oth…
rno-miR-141-3p	TargetScan Human	High (predicted)	DSTYK	dual serine/threonine and tyrosine protein kinase	Cancer,Dermatological Diseases and Conditions,Developmental Disorder,Endocrine System Disorders,Gastrointestinal Disease,Hereditary Disorder,Organismal Injury and Abnormalities,Renal and Urological Disease	Cytoplasm	kinase		Human,Mouse,Rat	Activated CD56bright NK cells,Activated helper T cells,Activated Vd1 Gamma-delta T cells,Activated Vd2 Gamma-delta T cells,Adipose,Amygdala,B lymphocytes not otherwise specified,BDCA-1+ dendritic cells,BDCA-3+ dendritic cells,Bladder,CD56dim NK cells,Central memory cytotoxic T cells,Central memory helper T cells,Cerebellum,Cerebral Cortex,Cytotoxic T cells,Dorsal Root Ganglion,Effector memory cyt…
rno-miR-141-3p	TargetScan Human	Moderate (predicted)	E2F4	E2F transcription factor 4, p107/p130-binding	Auditory Disease,Cancer,Developmental Disorder,Endocrine System Disorders,Hematological Disease,Immunological Disease,Infectious Disease,Inflammatory Disease,Organismal Injury and Abnormalities,Reproductive System Disease,Respiratory Disease	Nucleus	transcription regulator	Breast Cancer Regulation by Stathmin1,Cell Cycle Regulation by BTG Family Proteins,Cell Cycle: G1/S Checkpoint Regulation,Chronic Myeloid Leukemia Signaling,Colorectal Cancer Metastasis Signaling,Cyclins and Cell Cycle Regulation,Estrogen-mediated S-phase Entry,Glioblastoma Multiforme Signaling,Glioma Signaling,Molecular Mechanisms of Cancer,Pancreatic Adenocarcinoma Signaling,Role of BRCA1 in DN…	Human,Mouse,Rat	Activated Vd1 Gamma-delta T cells,Activated Vd2 Gamma-delta T cells,Adipose,B lymphocytes not otherwise specified,Brain,Dermis,Effector T cells,Granulosa cells,Keratinocytes,Large Intestine,Lung,Ovary,Pituitary Gland,Skeletal Muscle,Skin,Spleen,Thymus,Uterus,Vd1 Gamma-delta T cells,Vd2 Gamma-delta T cells,786-0,A498,A549-ATCC,ACHN,BT-549,CAKI-1,CCRF-CEM,COLO205,DU-145,EKVX,H460,HCC-2998,HCT-116,H…
rno-miR-141-3p	TargetScan Human	Moderate (predicted)	EGFR	epidermal growth factor receptor	Antimicrobial Response,Cancer,Cardiovascular Disease,Connective Tissue Disorders,Dermatological Diseases and Conditions,Developmental Disorder,Endocrine System Disorders,Gastrointestinal Disease,Hematological Disease,Hepatic System Disease,Hereditary Disorder,Immunological Disease,Infectious Disease,Inflammatory Disease,Inflammatory Response,Metabolic Disease,Neurological Disease,Nutritional Dise…	Plasma Membrane	kinase	Agrin Interactions at Neuromuscular Junction,Bladder Cancer Signaling,Caveolar-mediated Endocytosis Signaling,Cholecystokinin/Gastrin-mediated Signaling,Colorectal Cancer Metastasis Signaling,EGF Signaling,Epithelial Adherens Junction Signaling,ErbB Signaling,ERK5 Signaling,Estrogen-Dependent Breast Cancer Signaling,FAK Signaling,G Beta Gamma Signaling,Gap Junction Signaling,Glioblastoma Multifor…	Human,Mouse,Rat	Activated CD56dim NK cells,Activated helper T cells,Activated Vd1 Gamma-delta T cells,Activated Vd2 Gamma-delta T cells,Adipocytes,Adipose,Adrenal Gland,Astrocytes,B lymphocytes not otherwise specified,BDCA-1+ dendritic cells,Brain,Cartilage Tissue,CD56bright NK cells,CD56dim NK cells,Central memory helper T cells,Cerebellum,Chondrocytes,Cytotoxic T cells,Dermis,Effector memory helper T cells,Eff…
rno-miR-141-3p	TargetScan Human	High (predicted)	EGLN1	egl-9 family hypoxia-inducible factor 1	Cancer,Cardiovascular Disease,Connective Tissue Disorders,Developmental Disorder,Gastrointestinal Disease,Hematological Disease,Hepatic System Disease,Hereditary Disorder,Inflammatory Disease,Inflammatory Response,Neurological Disease,Organismal Injury and Abnormalities,Psychological Disorders,Reproductive System Disease,Skeletal and Muscular Disorders	Cytoplasm	enzyme	HIF1α Signaling	Human,Mouse,Rat	Activated helper T cells,BDCA-1+ dendritic cells,BDCA-3+ dendritic cells,Central memory cytotoxic T cells,Cerebellum,Dorsal Root Ganglion,Effector memory cytotoxic T cells,Effector memory RA+ cytotoxic T cells,Effector T cells,Heart,Hippocampus,Hypothalamus,Immature monocyte-derived dendritic cells,Kidney,Large Intestine,Lung,Mature monocyte-derived dendritic cells,Monocyte-derived macrophage,Mur…
rno-miR-141-3p	TargetScan Human	High (predicted)	EGR2	early growth response 2	Cancer,Cardiovascular Disease,Connective Tissue Disorders,Developmental Disorder,Endocrine System Disorders,Gastrointestinal Disease,Hematological Disease,Hereditary Disorder,Immunological Disease,Inflammatory Disease,Inflammatory Response,Neurological Disease,Organismal Injury and Abnormalities,Psychological Disorders,Reproductive System Disease,Skeletal and Muscular Disorders	Nucleus	transcription regulator	Adipogenesis pathway	Human,Mouse,Rat	Activated CD56bright NK cells,Activated CD56dim NK cells,Activated helper T cells,Activated Vd1 Gamma-delta T cells,Activated Vd2 Gamma-delta T cells,Bone marrow cells not otherwise specified,Cerebral Cortex,Cytotoxic T cells,Epidermis,Immature monocyte-derived dendritic cells,Mature monocyte-derived dendritic cells,Memory B cells,Monocyte-derived macrophage,Murine NKT cells,Naive B cells,Naive h…
rno-miR-141-3p	TargetScan Human	High (predicted)	EIF4EBP2	eukaryotic translation initiation factor 4E binding protein 2	Cancer,Endocrine System Disorders,Infectious Disease,Inflammatory Response,Metabolic Disease,Nutritional Disease	Cytoplasm	other	Regulation of eIF4 and p70S6K Signaling	Human,Mouse,Rat	Activated helper T cells,Adipose,Amygdala,B lymphocytes not otherwise specified,BDCA-1+ dendritic cells,BDCA-3+ dendritic cells,Bladder,Central memory cytotoxic T cells,Cerebellum,Cerebral Cortex,Cytotoxic T cells,Dorsal Root Ganglion,Effector memory cytotoxic T cells,Effector memory RA+ cytotoxic T cells,Effector T cells,Epidermis,Heart,Hippocampus,Hypothalamus,Immature monocyte-derived dendriti…
rno-miR-141-3p	TargetScan Human	High (predicted)	ENAH	enabled homolog (Drosophila)	Cancer,Endocrine System Disorders,Gastrointestinal Disease,Hepatic System Disease,Immunological Disease,Metabolic Disease,Organismal Injury and Abnormalities,Reproductive System Disease,Respiratory Disease,Tumor Morphology	Plasma Membrane	other	Netrin Signaling	Human,Mouse,Rat	Adipose,Amygdala,BDCA-1+ dendritic cells,BDCA-3+ dendritic cells,Bladder,Central memory cytotoxic T cells,Cerebellum,Cerebral Cortex,Dorsal Root Ganglion,Effector memory cytotoxic T cells,Epidermis,Heart,Hippocampus,Hypothalamus,Kidney,Large Intestine,Lung,Mammary Gland,Monocyte-derived macrophage,Olfactory Bulb,Ovary,Pituitary Gland,Placenta,Prostate Gland,Retina,Salivary Gland,Skeletal Muscle,S…
rno-miR-141-3p	TargetScan Human	High (predicted)	EPHA5	EPH receptor A5	Cancer,Endocrine System Disorders,Gastrointestinal Disease,Hepatic System Disease,Neurological Disease,Respiratory Disease	Plasma Membrane	kinase	Axonal Guidance Signaling,Ephrin A Signaling,Ephrin Receptor Signaling	Human,Mouse,Rat	Activated Vd1 Gamma-delta T cells,Activated Vd2 Gamma-delta T cells,Brain,CD56bright NK cells,CD56dim NK cells,Central memory helper T cells,Cerebellum,Fibroblasts,Granule cells,Nervous System not otherwise specified,Neutrophils,Olfactory Bulb,Osteoblasts,Other Organ Systems,Other Tissues and Primary Cells,Pituitary Gland,Vd2 Gamma-delta T cells,BT-549,H460,HeLa,HS 578T,NCI-H522,PC-3,RAW 264.7,SF…
rno-miR-141-3p	TargetScan Human	High (predicted)	EPHA7	EPH receptor A7	Cancer,Developmental Disorder,Gastrointestinal Disease,Hepatic System Disease,Neurological Disease,Organismal Injury and Abnormalities,Reproductive System Disease	Plasma Membrane	kinase	Axonal Guidance Signaling,Ephrin A Signaling,Ephrin Receptor Signaling	Human,Mouse,Rat	Amygdala,Brain,CD34+ cells,Cerebellum,Cerebral Cortex,Effector memory RA+ cytotoxic T cells,Epidermis,Hematopoietic progenitor cells,Hippocampus,Hypothalamus,Kidney,Large Intestine,Lung,Neurons not otherwise specified,Olfactory Bulb,Pancreas,Peripheral blood monocytes,Pituitary Gland,Retina,Salivary Gland,Skeletal Muscle,Spleen,Substantia Nigra,A498,ACHN,HeLa,LOX IMVI,Other Lymphoma Cell Lines,PC…
rno-miR-141-3p	TargetScan Human	High (predicted)	EPN1	epsin 1	Cancer,Developmental Disorder,Infectious Disease,Nutritional Disease	Plasma Membrane	other	Clathrin-mediated Endocytosis Signaling,Epithelial Adherens Junction Signaling,Germ Cell-Sertoli Cell Junction Signaling,Sertoli Cell-Sertoli Cell Junction Signaling	Human,Mouse,Rat	Adipose,Amygdala,B lymphocytes not otherwise specified,Bladder,Cerebellum,Cerebral Cortex,Cytotoxic T cells,Dorsal Root Ganglion,Effector T cells,Epidermis,Heart,Hippocampus,Hypothalamus,Kidney,Large Intestine,Liver,Lung,Murine NKT cells,Olfactory Bulb,Ovary,Pancreas,Pituitary Gland,Placenta,Prostate Gland,Retina,Salivary Gland,Skeletal Muscle,Small Intestine,Spleen,Stomach,Substantia Nigra,Testi…
rno-miR-141-3p	miRecords	Experimentally Observed	ERBB2IP	erbb2 interacting protein	Cancer,Cardiovascular Disease,Developmental Disorder,Endocrine System Disorders,Gastrointestinal Disease,Hematological Disease,Hepatic System Disease,Immunological Disease,Organismal Injury and Abnormalities,Reproductive System Disease	Plasma Membrane	other	Neuregulin Signaling	Human,Mouse,Rat	Activated helper T cells,Adipose,Amygdala,B lymphocytes not otherwise specified,Bladder,Brain,Central memory cytotoxic T cells,Cerebellum,Cerebral Cortex,Cytotoxic T cells,Dermis,Dorsal Root Ganglion,Effector memory RA+ cytotoxic T cells,Effector T cells,Epidermis,Gray Matter,Heart,Hippocampus,Hypothalamus,Keratinocytes,Kidney,Large Intestine,Liver,Lung,Mammary Gland,Mature monocyte-derived dendr…
rno-miR-141-3p	TargetScan Human	High (predicted)	FAM8A1	family with sequence similarity 8, member A1	Cancer,Endocrine System Disorders	Other	other		Human,Mouse,Rat	Activated CD56bright NK cells,Activated CD56dim NK cells,Activated Vd1 Gamma-delta T cells,Activated Vd2 Gamma-delta T cells,Adipose,Amygdala,B lymphocytes not otherwise specified,BDCA-1+ dendritic cells,BDCA-3+ dendritic cells,Bladder,Central memory cytotoxic T cells,Central memory helper T cells,Cerebellum,Cerebral Cortex,Cytotoxic T cells,Dorsal Root Ganglion,Effector memory cytotoxic T cells,…
rno-miR-141-3p	TargetScan Human	Moderate (predicted)	FKBP1A	FK506 binding protein 1A, 12kDa	Cancer,Cardiovascular Disease,Connective Tissue Disorders,Dermatological Diseases and Conditions,Developmental Disorder,Endocrine System Disorders,Gastrointestinal Disease,Hematological Disease,Hepatic System Disease,Hereditary Disorder,Immunological Disease,Infectious Disease,Inflammatory Disease,Inflammatory Response,Metabolic Disease,Neurological Disease,Ophthalmic Disease,Organismal Injury an…	Cytoplasm	enzyme	mTOR Signaling	Human,Mouse,Rat	Activated CD56bright NK cells,Activated CD56dim NK cells,Activated helper T cells,Activated Vd1 Gamma-delta T cells,Activated Vd2 Gamma-delta T cells,Adipose,Amygdala,B lymphocytes not otherwise specified,BDCA-1+ dendritic cells,BDCA-3+ dendritic cells,Bladder,Brain,Cardiomyocytes,CD56bright NK cells,CD56dim NK cells,Central memory cytotoxic T cells,Central memory helper T cells,Cerebellum,Cerebr…
rno-miR-141-3p	TargetScan Human	Moderate (predicted)	FNDC3B	fibronectin type III domain containing 3B	Cancer,Cardiovascular Disease,Endocrine System Disorders,Gastrointestinal Disease,Hepatic System Disease,Neurological Disease,Organismal Injury and Abnormalities,Psychological Disorders,Reproductive System Disease	Cytoplasm	other		Human,Mouse,Rat	Activated helper T cells,Adipose,Amygdala,BDCA-1+ dendritic cells,BDCA-3+ dendritic cells,Bladder,Central memory cytotoxic T cells,Cerebellum,Cerebral Cortex,Cytotoxic T cells,Dorsal Root Ganglion,Effector memory cytotoxic T cells,Effector memory RA+ cytotoxic T cells,Epidermis,Heart,Hippocampus,Hypothalamus,Immature monocyte-derived dendritic cells,Kidney,Large Intestine,Liver,Lung,Mammary Gland…
rno-miR-141-3p	TargetScan Human	High (predicted)	FOXJ1	forkhead box J1	Cancer,Cardiovascular Disease,Connective Tissue Disorders,Developmental Disorder,Gastrointestinal Disease,Hepatic System Disease,Immunological Disease,Inflammatory Disease,Inflammatory Response,Neurological Disease,Nutritional Disease,Organismal Injury and Abnormalities,Renal and Urological Disease,Reproductive System Disease,Respiratory Disease,Skeletal and Muscular Disorders,Tumor Morphology	Nucleus	transcription regulator		Human,Mouse,Rat	Adipose,Amygdala,B lymphocytes not otherwise specified,Bladder,Cerebellum,Cerebral Cortex,Cytotoxic T cells,Dorsal Root Ganglion,Effector T cells,Epidermis,Epithelial cells not otherwise specified,Heart,Hippocampus,Hypothalamus,Kidney,Large Intestine,Lung,Mammary Gland,Naive helper T cells,Olfactory Bulb,Other Cells,Other Nervous System,Other Organ Systems,Ovary,Pituitary Gland,Placenta,Retina,Sa…
rno-miR-141-3p	TargetScan Human	High (predicted)	FRMD6	FERM domain containing 6	Cancer,Developmental Disorder,Gastrointestinal Disease,Hepatic System Disease,Hereditary Disorder,Organismal Injury and Abnormalities,Renal and Urological Disease,Reproductive System Disease	Cytoplasm	other	HIPPO signaling	Human,Mouse,Rat	Activated helper T cells,Adipose,Amygdala,B lymphocytes not otherwise specified,Bladder,Cells not otherwise specified,Cerebellum,Cerebral Cortex,Cytotoxic T cells,Dorsal Root Ganglion,Effector memory cytotoxic T cells,Effector memory RA+ cytotoxic T cells,Effector T cells,Epidermis,Fibroblasts,Heart,Hippocampus,Hypothalamus,Immature monocyte-derived dendritic cells,Kidney,Large Intestine,Liver,Lu…
rno-miR-141-3p	TargetScan Human	Moderate (predicted)	FRS2	fibroblast growth factor receptor substrate 2	Cancer,Developmental Disorder,Endocrine System Disorders,Infectious Disease,Ophthalmic Disease,Reproductive System Disease	Plasma Membrane	other	FGF Signaling,GDNF Family Ligand-Receptor Interactions,Neurotrophin/TRK Signaling,Regulation of the Epithelial-Mesenchymal Transition Pathway	Human,Mouse,Rat	Activated Vd1 Gamma-delta T cells,Amygdala,BDCA-1+ dendritic cells,BDCA-3+ dendritic cells,Brain,Central memory cytotoxic T cells,Cerebellum,Cerebral Cortex,Cytotoxic T cells,Dorsal Root Ganglion,Effector memory cytotoxic T cells,Effector memory RA+ cytotoxic T cells,Effector T cells,Epidermis,Heart,Hippocampus,Hypothalamus,Immature monocyte-derived dendritic cells,Kidney,Liver,Lung,Mature monocy…
rno-miR-141-3p	TargetScan Human	Moderate (predicted)	GABRA5	gamma-aminobutyric acid (GABA) A receptor, alpha 5	Auditory Disease,Cancer,Cardiovascular Disease,Connective Tissue Disorders,Developmental Disorder,Endocrine System Disorders,Gastrointestinal Disease,Hepatic System Disease,Hereditary Disorder,Immunological Disease,Infectious Disease,Inflammatory Disease,Metabolic Disease,Neurological Disease,Nutritional Disease,Organismal Injury and Abnormalities,Psychological Disorders,Reproductive System Disea…	Plasma Membrane	ion channel	GABA Receptor Signaling	Human,Mouse,Rat	Adipose,Amygdala,B lymphocytes not otherwise specified,Bladder,Brain,Cerebellum,Cerebral Cortex,Cytotoxic T cells,Dorsal Root Ganglion,Effector T cells,Epidermis,Heart,Hippocampus,Hypothalamus,Kidney,Large Intestine,Liver,Mammary Gland,Neurons not otherwise specified,Olfactory Bulb,Other Nervous System,Other Neurons,Ovary,Pituitary Gland,Placenta,Prostate Gland,Retina,Skeletal Muscle,Small Intest…
rno-miR-141-3p	TargetScan Human	High (predicted)	GATA6	GATA binding protein 6	Cancer,Cardiovascular Disease,Developmental Disorder,Endocrine System Disorders,Gastrointestinal Disease,Hereditary Disorder,Metabolic Disease,Organismal Injury and Abnormalities,Reproductive System Disease,Respiratory Disease,Skeletal and Muscular Disorders	Nucleus	transcription regulator	Role of NANOG in Mammalian Embryonic Stem Cell Pluripotency,Thrombin Signaling,Transcriptional Regulatory Network in Embryonic Stem Cells	Human,Mouse,Rat	Adrenal Gland,B lymphocytes not otherwise specified,Bladder,Central memory cytotoxic T cells,Cerebellum,Cytotoxic T cells,Endothelial cells not otherwise specified,Epidermis,Granulosa cells,Heart,Hippocampus,Kidney,Large Intestine,Liver,Lung,Mammary Gland,Mature monocyte-derived dendritic cells,Microvascular endothelial cells,Other Organ Systems,Other Tissues and Primary Cells,Ovary,Pancreas,Pitu…
rno-miR-141-3p	TargetScan Human	High (predicted)	GATAD2B	GATA zinc finger domain containing 2B	Cancer,Developmental Disorder,Gastrointestinal Disease,Hepatic System Disease,Hereditary Disorder,Neurological Disease	Nucleus	transcription regulator		Human,Mouse,Rat	Adipose,Amygdala,B lymphocytes not otherwise specified,Bladder,Brain,Central memory cytotoxic T cells,Cerebellum,Cerebral Cortex,Cytotoxic T cells,Dorsal Root Ganglion,Effector memory cytotoxic T cells,Effector memory RA+ cytotoxic T cells,Effector T cells,Epidermis,Heart,Hippocampus,Hypothalamus,Kidney,Large Intestine,Liver,Lung,Mammary Gland,Monocyte-derived macrophage,Olfactory Bulb,Ovary,Panc…
rno-miR-141-3p	TargetScan Human	High (predicted)	GCNT2	glucosaminyl (N-acetyl) transferase 2, I-branching enzyme (I blood group)	Cancer,Developmental Disorder,Gastrointestinal Disease,Hematological Disease,Hereditary Disorder,Metabolic Disease,Neurological Disease,Ophthalmic Disease,Organismal Injury and Abnormalities,Psychological Disorders,Renal and Urological Disease	Cytoplasm	enzyme		Human,Mouse,Rat	Adipose,Amygdala,BDCA-1+ dendritic cells,BDCA-3+ dendritic cells,Bladder,CD34+ cells,Cerebral Cortex,Dorsal Root Ganglion,Epidermis,Heart,Hematopoietic progenitor cells,Immature monocyte-derived dendritic cells,Kidney,Large Intestine,Lung,Mammary Gland,Mature monocyte-derived dendritic cells,Monocyte-derived macrophage,Other Cells,Other Tissues and Primary Cells,Ovary,Pituitary Gland,Placenta,Pla…
rno-miR-141-3p	TargetScan Human	High (predicted)	GNA13	guanine nucleotide binding protein (G protein), alpha 13	Cancer,Developmental Disorder,Endocrine System Disorders,Gastrointestinal Disease,Hematological Disease,Hepatic System Disease,Immunological Disease,Inflammatory Response,Neurological Disease,Organismal Injury and Abnormalities,Renal and Urological Disease,Reproductive System Disease	Plasma Membrane	enzyme	Actin Cytoskeleton Signaling,Androgen Signaling,Axonal Guidance Signaling,Breast Cancer Regulation by Stathmin1,Cardiac Hypertrophy Signaling,Cholecystokinin/Gastrin-mediated Signaling,CREB Signaling in Neurons,CXCR4 Signaling,Endothelin-1 Signaling,Ephrin B Signaling,Ephrin Receptor Signaling,ERK5 Signaling,G Beta Gamma Signaling,Gα12/13 Signaling,IL-1 Signaling,IL-8 Signaling,Molecular Mechanis…	Human,Mouse,Rat	Activated helper T cells,Activated Vd1 Gamma-delta T cells,Activated Vd2 Gamma-delta T cells,Adipose,Amygdala,B lymphocytes not otherwise specified,BDCA-1+ dendritic cells,BDCA-3+ dendritic cells,CD56dim NK cells,Central memory cytotoxic T cells,Central memory helper T cells,Cerebellum,Cerebral Cortex,Cytotoxic T cells,Dorsal Root Ganglion,Effector memory cytotoxic T cells,Effector memory helper …
rno-miR-141-3p	TargetScan Human	High (predicted)	GPHN	gephyrin	Cancer,Developmental Disorder,Hereditary Disorder,Metabolic Disease,Neurological Disease,Organismal Injury and Abnormalities,Reproductive System Disease,Respiratory Disease	Plasma Membrane	enzyme	GABA Receptor Signaling,Molybdenum Cofactor Biosynthesis	Human,Mouse,Rat	Adipose,Amygdala,B lymphocytes not otherwise specified,BDCA-1+ dendritic cells,BDCA-3+ dendritic cells,Bladder,Brain,Cerebellum,Cerebral Cortex,Cytotoxic T cells,Dorsal Root Ganglion,Effector T cells,Epidermis,Heart,Hippocampus,Hypothalamus,Immature monocyte-derived dendritic cells,Kidney,Large Intestine,Liver,Lung,Mammary Gland,Monocyte-derived macrophage,Murine NKT cells,Neurons not otherwise s…
rno-miR-141-3p	TargetScan Human	High (predicted)	GPRC5C	G protein-coupled receptor, class C, group 5, member C	Cancer,Endocrine System Disorders,Gastrointestinal Disease,Hepatic System Disease,Hereditary Disorder,Neurological Disease,Organismal Injury and Abnormalities,Psychological Disorders,Reproductive System Disease,Skeletal and Muscular Disorders	Plasma Membrane	G-protein coupled receptor		Human,Mouse,Rat	Brain,Cerebellum,Dorsal Root Ganglion,Kidney,Large Intestine,Lung,Other Nervous System,Other Neurons,Ovary,Pituitary Gland,Skeletal Muscle,Thymus,Tissues and Primary Cells not otherwise specified
rno-miR-141-3p	TargetScan Human	Moderate (predicted)	GRB10	growth factor receptor-bound protein 10	Cancer,Connective Tissue Disorders,Developmental Disorder,Gastrointestinal Disease,Hepatic System Disease,Immunological Disease,Inflammatory Disease,Organismal Injury and Abnormalities,Reproductive System Disease,Respiratory Disease,Skeletal and Muscular Disorders	Cytoplasm	other	IGF-1 Signaling,Insulin Receptor Signaling	Human,Mouse,Rat	Activated helper T cells,Activated Vd1 Gamma-delta T cells,Activated Vd2 Gamma-delta T cells,Adipose,Amygdala,Brain,CD56bright NK cells,Central memory helper T cells,Cytotoxic T cells,Dorsal Root Ganglion,Epidermis,Heart,Hypothalamus,Immature monocyte-derived dendritic cells,Intraepithelial T lymphocytes,Kidney,Large Intestine,Liver,Lung,Mature monocyte-derived dendritic cells,Memory B cells,Mono…
rno-miR-141-3p	TargetScan Human	Moderate (predicted)	GRIA4	glutamate receptor, ionotropic, AMPA 4	Cancer,Cardiovascular Disease,Endocrine System Disorders,Gastrointestinal Disease,Hepatic System Disease,Metabolic Disease,Neurological Disease,Organismal Injury and Abnormalities,Psychological Disorders,Reproductive System Disease	Plasma Membrane	ion channel	Amyotrophic Lateral Sclerosis Signaling,Calcium Signaling,CREB Signaling in Neurons,Glutamate Receptor Signaling,Neuropathic Pain Signaling In Dorsal Horn Neurons,Synaptic Long Term Depression,Synaptic Long Term Potentiation	Human,Mouse,Rat	Amygdala,Brain,Cerebellum,Cerebral Cortex,Dorsal Root Ganglion,Granule Cell Layer,Hippocampus,Hypothalamus,Microglia,Neurons not otherwise specified,Olfactory Bulb,Other Nervous System,Other Neurons,Other Stem cells,Parietal Lobe,Pituitary Gland,Retina,Spinal Cord,Striatum,Substantia Nigra,HL-60,MCF7,Other Cell Line,Other CNS Cell Lines,RPMI-8266
rno-miR-141-3p	TargetScan Human	Moderate (predicted)	GTF2H5	general transcription factor IIH, polypeptide 5	Dermatological Diseases and Conditions,Developmental Disorder,Hereditary Disorder,Neurological Disease,Organismal Injury and Abnormalities,Psychological Disorders,Reproductive System Disease	Nucleus	other	Adipogenesis pathway,Androgen Signaling,Assembly of RNA Polymerase II Complex,Estrogen Receptor Signaling,Glucocorticoid Receptor Signaling,Nucleotide Excision Repair Pathway,RAR Activation	Human,Mouse,Rat	Activated CD56bright NK cells,Activated CD56dim NK cells,Activated helper T cells,Activated Vd1 Gamma-delta T cells,Activated Vd2 Gamma-delta T cells,Adipose,Amygdala,BDCA-1+ dendritic cells,BDCA-3+ dendritic cells,Bladder,Central memory cytotoxic T cells,Cerebellum,Cerebral Cortex,Cytotoxic T cells,Dorsal Root Ganglion,Effector memory cytotoxic T cells,Effector memory RA+ cytotoxic T cells,Heart…
rno-miR-141-3p	TargetScan Human	High (predicted)	HCN1	hyperpolarization activated cyclic nucleotide-gated potassium channel 1	Cancer,Dermatological Diseases and Conditions,Endocrine System Disorders,Gastrointestinal Disease,Hepatic System Disease,Metabolic Disease,Neurological Disease,Organismal Injury and Abnormalities,Reproductive System Disease,Respiratory Disease	Plasma Membrane	ion channel		Human,Mouse,Rat	Amygdala,Bladder,Brain,Brainstem,Cerebellum,Cerebral Cortex,Cytotoxic T cells,Dorsal Root Ganglion,Effector T cells,Epidermis,Heart,Hippocampus,Hypothalamus,Kidney,Liver,Lung,Mammary Gland,Medulla Oblongata,Neurons not otherwise specified,Olfactory Bulb,Other Nervous System,Other Neurons,Other Organ Systems,Ovary,Pancreas,Pituitary Gland,Placenta,Prostate Gland,Pyramidal neurons,Retina,Salivary G…
rno-miR-141-3p	TargetScan Human	Moderate (predicted)	HEATR2	HEAT repeat containing 2	Cancer,Developmental Disorder,Hereditary Disorder,Organismal Injury and Abnormalities,Reproductive System Disease,Respiratory Disease	Other	other		Human,Mouse,Rat	Activated CD56bright NK cells,Activated CD56dim NK cells,Activated helper T cells,Activated Vd1 Gamma-delta T cells,Activated Vd2 Gamma-delta T cells,Adipose,Amygdala,B lymphocytes not otherwise specified,BDCA-1+ dendritic cells,BDCA-3+ dendritic cells,Bladder,CD56dim NK cells,Central memory cytotoxic T cells,Central memory helper T cells,Cerebellum,Cerebral Cortex,Cytotoxic T cells,Dorsal Root G…
rno-miR-141-3p	TargetScan Human	High (predicted)	HECTD1	HECT domain containing E3 ubiquitin protein ligase 1	Cancer,Connective Tissue Disorders,Developmental Disorder,Endocrine System Disorders,Gastrointestinal Disease,Hepatic System Disease,Infectious Disease,Neurological Disease,Organismal Injury and Abnormalities,Reproductive System Disease,Skeletal and Muscular Disorders	Other	enzyme		Human,Mouse,Rat	Adipose,Amygdala,B lymphocytes not otherwise specified,BDCA-1+ dendritic cells,BDCA-3+ dendritic cells,Bladder,Central memory cytotoxic T cells,Cerebellum,Cerebral Cortex,Cytotoxic T cells,Dorsal Root Ganglion,Effector memory cytotoxic T cells,Effector memory RA+ cytotoxic T cells,Effector T cells,Epidermis,Heart,Hippocampus,Hypothalamus,Immature monocyte-derived dendritic cells,Kidney,Large Inte…
rno-miR-141-3p	TargetScan Human	High (predicted)	HGF	hepatocyte growth factor (hepapoietin A; scatter factor)	Auditory Disease,Cancer,Cardiovascular Disease,Dermatological Diseases and Conditions,Developmental Disorder,Endocrine System Disorders,Gastrointestinal Disease,Hematological Disease,Hepatic System Disease,Hereditary Disorder,Immunological Disease,Infectious Disease,Inflammatory Disease,Inflammatory Response,Metabolic Disease,Neurological Disease,Ophthalmic Disease,Organismal Injury and Abnormali…	Extracellular Space	growth factor	Epithelial Adherens Junction Signaling,FGF Signaling,Hepatic Fibrosis / Hepatic Stellate Cell Activation,HGF Signaling,Macropinocytosis Signaling,Regulation of the Epithelial-Mesenchymal Transition Pathway,Remodeling of Epithelial Adherens Junctions,Renal Cell Carcinoma Signaling	Human,Mouse,Rat	Activated Vd2 Gamma-delta T cells,Adipose,Amygdala,Bladder,Bone marrow cells not otherwise specified,Brain,Brainstem,Cardiomyocytes,CD56dim NK cells,Central memory helper T cells,Cerebral Ventricles,Choroid Plexus,Cytotoxic T cells,Dermis,Fibroblasts,Granulocytes not otherwise specified,Heart,Hematopoietic progenitor cells,Hepatocytes,Immature monocyte-derived dendritic cells,Kidney,Large Intesti…
rno-miR-141-3p	TargetScan Human	High (predicted)	HIPK1	homeodomain interacting protein kinase 1	Cancer,Connective Tissue Disorders,Dermatological Diseases and Conditions,Developmental Disorder,Endocrine System Disorders,Gastrointestinal Disease,Immunological Disease,Infectious Disease,Metabolic Disease,Neurological Disease,Organismal Injury and Abnormalities,Reproductive System Disease,Skeletal and Muscular Disorders,Tumor Morphology	Nucleus	kinase	Pyridoxal 5'-phosphate Salvage Pathway,Salvage Pathways of Pyrimidine Ribonucleotides	Human,Mouse,Rat	Activated CD56bright NK cells,Activated CD56dim NK cells,Activated helper T cells,Activated Vd1 Gamma-delta T cells,Activated Vd2 Gamma-delta T cells,Adipose,Amygdala,B lymphocytes not otherwise specified,BDCA-1+ dendritic cells,BDCA-3+ dendritic cells,Bladder,Brain,CD56bright NK cells,CD56dim NK cells,Central memory cytotoxic T cells,Central memory helper T cells,Cerebellum,Cerebral Cortex,Cytot…
rno-miR-141-3p	TargetScan Human	High (predicted)	HIPK2	homeodomain interacting protein kinase 2	Cancer,Connective Tissue Disorders,Developmental Disorder,Gastrointestinal Disease,Neurological Disease,Nutritional Disease,Organismal Injury and Abnormalities,Reproductive System Disease,Respiratory Disease,Skeletal and Muscular Disorders,Tumor Morphology	Nucleus	kinase	Cell Cycle: G2/M DNA Damage Checkpoint Regulation,Molecular Mechanisms of Cancer,p53 Signaling	Human,Mouse,Rat	Activated CD56bright NK cells,Activated CD56dim NK cells,Activated helper T cells,Activated Vd1 Gamma-delta T cells,Activated Vd2 Gamma-delta T cells,Adipocytes,Adipose,Amygdala,B lymphocytes not otherwise specified,BDCA-1+ dendritic cells,BDCA-3+ dendritic cells,Bladder,CD56dim NK cells,Central memory cytotoxic T cells,Central memory helper T cells,Cerebellum,Cerebral Cortex,Cytotoxic T cells,Do…
rno-miR-141-3p	TargetScan Human	Moderate (predicted)	HOPX	HOP homeobox	Cancer,Cardiovascular Disease,Developmental Disorder,Organismal Injury and Abnormalities,Reproductive System Disease	Nucleus	transcription regulator		Human,Mouse,Rat	Adipose,Amygdala,B lymphocytes not otherwise specified,Bladder,Brain,Cells not otherwise specified,Cerebellum,Cerebral Cortex,Cytotoxic T cells,Dorsal Root Ganglion,Effector T cells,Epidermis,Heart,Hippocampus,Hypothalamus,Large Intestine,Liver,Lung,Memory B cells,Murine NKT cells,Naive B cells,Olfactory Bulb,Other Tissues and Primary Cells,Ovary,Pituitary Gland,Placenta,Prostate Gland,Retina,Sal…
rno-miR-141-3p	TargetScan Human	High (predicted)	HOXA11	homeobox A11	Cancer,Developmental Disorder,Endocrine System Disorders,Hereditary Disorder,Organismal Injury and Abnormalities,Renal and Urological Disease,Reproductive System Disease,Skeletal and Muscular Disorders	Nucleus	transcription regulator		Human,Mouse,Rat	Bladder,Large Intestine,Mammary Gland,Other Cells,Other Organ Systems,Ovary,Pituitary Gland,Placenta,Prostate Gland,Salivary Gland,Uterus,A498,CAKI-1,COLO205,DU-145,EKVX,H460,HCT-116,HCT-15,HEL,HeLa,HL-60,HOP-62,HS 578T,HT29,KM-12,LOX IMVI,NB4,OVCAR-5,PC-3,RXF-393,SK-MEL-28,SW-620,THP-1,TK-10,U937,UACC-257,UO-31
rno-miR-141-3p	TargetScan Human	Moderate (predicted)	HSPA4L	heat shock 70kDa protein 4-like	Cancer,Endocrine System Disorders,Hematological Disease,Nutritional Disease,Organismal Injury and Abnormalities,Renal and Urological Disease,Reproductive System Disease	Cytoplasm	other	Aldosterone Signaling in Epithelial Cells,Protein Ubiquitination Pathway	Human,Mouse,Rat	Adipose,Amygdala,CD56bright NK cells,Cerebellum,Cerebral Cortex,Cytotoxic T cells,Dorsal Root Ganglion,Effector T cells,Epidermis,Fibroblasts,Heart,Hippocampus,Hypothalamus,Kidney,Large Intestine,Liver,Lung,Mature monocyte-derived dendritic cells,Murine NKT cells,Olfactory Bulb,Other Cells,Other Organ Systems,Ovary,Pancreas,Pituitary Gland,Placenta,Prostate Gland,Retina,Salivary Gland,Skeletal Mu…
rno-miR-141-3p	TargetScan Human	Moderate (predicted)	HTR2A	5-hydroxytryptamine (serotonin) receptor 2A, G protein-coupled	Cancer,Cardiovascular Disease,Connective Tissue Disorders,Dermatological Diseases and Conditions,Developmental Disorder,Endocrine System Disorders,Gastrointestinal Disease,Hematological Disease,Hereditary Disorder,Immunological Disease,Infectious Disease,Inflammatory Disease,Inflammatory Response,Metabolic Disease,Neurological Disease,Nutritional Disease,Ophthalmic Disease,Organismal Injury and A…	Plasma Membrane	G-protein coupled receptor	G-Protein Coupled Receptor Signaling,Gap Junction Signaling,Gαq Signaling,Serotonin Receptor Signaling	Human,Mouse,Rat	Activated helper T cells,Activated Vd1 Gamma-delta T cells,BDCA-3+ dendritic cells,Brain,Brainstem,CD56bright NK cells,CD56dim NK cells,Central memory cytotoxic T cells,Central memory helper T cells,Cerebral Cortex,Cytotoxic T cells,Dendritic cells not otherwise specified,Effector memory cytotoxic T cells,Effector memory RA+ cytotoxic T cells,Eosinophils,Heart,Hippocampus,Hypothalamus,Mature mono…
rno-miR-141-3p	TargetScan Human	High (predicted)	IDE	insulin-degrading enzyme	Cancer,Connective Tissue Disorders,Dermatological Diseases and Conditions,Endocrine System Disorders,Gastrointestinal Disease,Hepatic System Disease,Immunological Disease,Infectious Disease,Inflammatory Disease,Inflammatory Response,Metabolic Disease,Neurological Disease,Nutritional Disease,Ophthalmic Disease,Organismal Injury and Abnormalities,Psychological Disorders,Respiratory Disease,Skeletal…	Extracellular Space	peptidase	Neuroprotective Role of THOP1 in Alzheimer's Disease	Human,Mouse,Rat	Activated CD56bright NK cells,Activated CD56dim NK cells,Activated helper T cells,Activated Vd1 Gamma-delta T cells,Activated Vd2 Gamma-delta T cells,Adipose,Adrenal Gland,Amygdala,B lymphocytes not otherwise specified,BDCA-1+ dendritic cells,BDCA-3+ dendritic cells,Bladder,Brain,Central memory helper T cells,Cerebellum,Cerebral Cortex,Cytotoxic T cells,Dorsal Root Ganglion,Effector memory helper…
rno-miR-141-3p	TargetScan Human	High (predicted)	IFNAR1	interferon (alpha, beta and omega) receptor 1	Antimicrobial Response,Cancer,Cardiovascular Disease,Connective Tissue Disorders,Dermatological Diseases and Conditions,Developmental Disorder,Endocrine System Disorders,Gastrointestinal Disease,Hematological Disease,Hepatic System Disease,Hypersensitivity Response,Immunological Disease,Infectious Disease,Inflammatory Disease,Inflammatory Response,Metabolic Disease,Neurological Disease,Ophthalmic…	Plasma Membrane	transmembrane receptor	Activation of IRF by Cytosolic Pattern Recognition Receptors,Dendritic Cell Maturation,Hepatic Fibrosis / Hepatic Stellate Cell Activation,Interferon Signaling,Retinoic acid Mediated Apoptosis Signaling,Role of JAK1, JAK2 and TYK2 in Interferon Signaling,Role of Lipids/Lipid Rafts in the Pathogenesis of Influenza,Role of PI3K/AKT Signaling in the Pathogenesis of Influenza,Role of Wnt/GSK-3β Signa…	Human,Mouse,Rat	Adipose,Amygdala,B lymphocytes not otherwise specified,BDCA-1+ dendritic cells,BDCA-3+ dendritic cells,Bladder,Bone marrow-derived macrophages,Brain,Cartilage Tissue,Cerebellum,Chondrocytes,Cytotoxic T cells,Dorsal Root Ganglion,Effector T cells,Epidermis,Fibroblasts,Heart,Hematopoietic progenitor cells,Hippocampus,Hypothalamus,Immature monocyte-derived dendritic cells,Kidney,Large Intestine,Live…
rno-miR-141-3p	TargetScan Human	High (predicted)	IGDCC4	immunoglobulin superfamily, DCC subclass, member 4	Cancer,Endocrine System Disorders,Gastrointestinal Disease,Hepatic System Disease,Organismal Injury and Abnormalities,Reproductive System Disease	Plasma Membrane	other		Human,Mouse,Rat	Amygdala,Bladder,Cerebellum,Cerebral Cortex,Dorsal Root Ganglion,Epidermis,Heart,Hippocampus,Hypothalamus,Large Intestine,Olfactory Bulb,Ovary,Pituitary Gland,Prostate Gland,Retina,Skeletal Muscle,Spleen,Stomach,Substantia Nigra,Testis,Thymus,Uterus,ACHN,CAKI-1,H460,HOP-62,HOP-92,LOX IMVI,MALME-3M,MDA-MB-231,NCI-ADR-RES,NCI-H522,OVCAR-5,RXF-393,SF-268,SF-539,SNB-75,SR,SW-620,TK-10,U251,UACC-62,UO…
rno-miR-141-3p	TargetScan Human	High (predicted)	IGF1R	insulin-like growth factor 1 receptor	Cancer,Cardiovascular Disease,Connective Tissue Disorders,Dermatological Diseases and Conditions,Developmental Disorder,Endocrine System Disorders,Gastrointestinal Disease,Hematological Disease,Hepatic System Disease,Hereditary Disorder,Immunological Disease,Infectious Disease,Inflammatory Disease,Inflammatory Response,Metabolic Disease,Neurological Disease,Nutritional Disease,Organismal Injury a…	Plasma Membrane	transmembrane receptor	Cardiac Hypertrophy Signaling,Estrogen-Dependent Breast Cancer Signaling,Glioblastoma Multiforme Signaling,Glioma Signaling,Growth Hormone Signaling,Hepatic Fibrosis / Hepatic Stellate Cell Activation,Huntington's Disease Signaling,IGF-1 Signaling,Myc Mediated Apoptosis Signaling,NF-κB Signaling,PTEN Signaling,RhoA Signaling,Role of NFAT in Cardiac Hypertrophy,STAT3 Pathway,Synaptic Long Term Dep…	Human,Mouse,Rat	Activated CD56bright NK cells,Activated helper T cells,Activated Vd1 Gamma-delta T cells,Activated Vd2 Gamma-delta T cells,Adipocytes,Adipose,Adrenal Gland,Amygdala,Astrocytes,B lymphocytes not otherwise specified,BDCA-1+ dendritic cells,BDCA-3+ dendritic cells,Beta islet cells,Bladder,Bone marrow cells not otherwise specified,Brain,Cartilage Tissue,Caudate Nucleus,CD34+ cells,CD56bright NK cells…
rno-miR-141-3p	TargetScan Human	High (predicted)	IGF2	insulin-like growth factor 2	Cancer,Cardiovascular Disease,Developmental Disorder,Endocrine System Disorders,Gastrointestinal Disease,Hematological Disease,Hepatic System Disease,Hereditary Disorder,Immunological Disease,Metabolic Disease,Neurological Disease,Nutritional Disease,Ophthalmic Disease,Organismal Injury and Abnormalities,Psychological Disorders,Renal and Urological Disease,Reproductive System Disease,Respiratory …	Extracellular Space	growth factor	Glioblastoma Multiforme Signaling,Glioma Signaling,Growth Hormone Signaling,Hepatic Fibrosis / Hepatic Stellate Cell Activation	Human,Mouse,Rat	Activated Vd1 Gamma-delta T cells,Activated Vd2 Gamma-delta T cells,Adrenal Gland,Astrocytes,Bladder,Brain,Calvaria,Cartilage Tissue,Cerebellum,Cerebral Cortex,Cerebral Ventricles,Choroid Plexus,Dendritic cells not otherwise specified,Fibroblasts,Granule Cell Layer,Granule cells,Heart,Hippocampus,Kidney,Liver,Mammary Gland,Nervous System not otherwise specified,Neurons not otherwise specified,Oth…
rno-miR-141-3p	TargetScan Human	Moderate (predicted)	IL6R	interleukin 6 receptor	Cancer,Cardiovascular Disease,Connective Tissue Disorders,Dermatological Diseases and Conditions,Developmental Disorder,Endocrine System Disorders,Gastrointestinal Disease,Hepatic System Disease,Hereditary Disorder,Hypersensitivity Response,Immunological Disease,Infectious Disease,Inflammatory Disease,Inflammatory Response,Metabolic Disease,Neurological Disease,Nutritional Disease,Ophthalmic Dise…	Plasma Membrane	transmembrane receptor	Acute Phase Response Signaling,Cardiac Hypertrophy Signaling,Colorectal Cancer Metastasis Signaling,Hepatic Fibrosis / Hepatic Stellate Cell Activation,IL-6 Signaling,Role of JAK family kinases in IL-6-type Cytokine Signaling,Role of Macrophages, Fibroblasts and Endothelial Cells in Rheumatoid Arthritis,Systemic Lupus Erythematosus Signaling,T Helper Cell Differentiation	Human,Mouse,Rat	Activated CD56dim NK cells,Activated Vd1 Gamma-delta T cells,Activated Vd2 Gamma-delta T cells,Adipocytes,Adipose,Amygdala,B lymphocytes not otherwise specified,BDCA-1+ dendritic cells,BDCA-3+ dendritic cells,Bladder,Bone marrow cells not otherwise specified,Brain,Brainstem,Cardiomyocytes,CD4+ T-lymphocytes,Central memory helper T cells,Cerebral Cortex,Cytotoxic T cells,Epithelial cells not other…
rno-miR-141-3p	TargetScan Human	High (predicted)	IPO5	importin 5	Cancer,Dermatological Diseases and Conditions,Endocrine System Disorders,Gastrointestinal Disease,Hepatic System Disease,Neurological Disease,Organismal Injury and Abnormalities,Psychological Disorders,Reproductive System Disease	Nucleus	transporter	RAN Signaling	Human,Mouse,Rat	Activated CD56bright NK cells,Activated CD56dim NK cells,Activated helper T cells,Activated Vd1 Gamma-delta T cells,Activated Vd2 Gamma-delta T cells,Adipose,Amygdala,B lymphocytes not otherwise specified,BDCA-1+ dendritic cells,BDCA-3+ dendritic cells,Bladder,Central memory cytotoxic T cells,Central memory helper T cells,Cerebellum,Cerebral Cortex,Cytotoxic T cells,Dorsal Root Ganglion,Effector …
rno-miR-141-3p	TargetScan Human	Moderate (predicted)	IREB2	iron-responsive element binding protein 2	Cancer,Connective Tissue Disorders,Developmental Disorder,Endocrine System Disorders,Gastrointestinal Disease,Hematological Disease,Hepatic System Disease,Metabolic Disease,Neurological Disease,Organismal Injury and Abnormalities,Psychological Disorders,Reproductive System Disease,Skeletal and Muscular Disorders	Cytoplasm	translation regulator		Human,Mouse,Rat	Activated helper T cells,Adipose,Amygdala,B lymphocytes not otherwise specified,BDCA-1+ dendritic cells,BDCA-3+ dendritic cells,Bladder,Brain,Central memory cytotoxic T cells,Cerebellum,Cerebral Cortex,Cytotoxic T cells,Dorsal Root Ganglion,Effector memory cytotoxic T cells,Effector memory RA+ cytotoxic T cells,Effector T cells,Epidermis,Granule Cell Layer,Heart,Hippocampus,Hypothalamus,Immature …
rno-miR-141-3p	TargetScan Human	High (predicted)	IRF2BPL	interferon regulatory factor 2 binding protein-like	Cancer,Endocrine System Disorders,Gastrointestinal Disease,Respiratory Disease	Nucleus	other		Human,Mouse,Rat	Activated helper T cells,Adipose,Amygdala,B lymphocytes not otherwise specified,BDCA-1+ dendritic cells,BDCA-3+ dendritic cells,Bladder,Central memory cytotoxic T cells,Cerebellum,Cerebral Cortex,Cytotoxic T cells,Dorsal Root Ganglion,Effector memory cytotoxic T cells,Effector memory RA+ cytotoxic T cells,Effector T cells,Epidermis,Hippocampus,Hypothalamus,Immature monocyte-derived dendritic cell…
rno-miR-141-3p	TargetScan Human	Moderate (predicted)	IRF6	interferon regulatory factor 6	Cancer,Connective Tissue Disorders,Developmental Disorder,Endocrine System Disorders,Gastrointestinal Disease,Hematological Disease,Hereditary Disorder,Immunological Disease,Infectious Disease,Inflammatory Response,Organismal Injury and Abnormalities,Respiratory Disease,Skeletal and Muscular Disorders	Nucleus	transcription regulator		Human,Mouse,Rat	Adipose,B lymphocytes not otherwise specified,Bladder,Cytotoxic T cells,Dorsal Root Ganglion,Effector T cells,Epidermis,Kidney,Large Intestine,Liver,Lung,Mammary Gland,Memory B cells,Naive B cells,Other Tissues and Primary Cells,Ovary,Pancreas,Pituitary Gland,Placenta,Prostate Gland,Retina,Salivary Gland,Skeletal Muscle,Skin,Small Intestine,Spleen,Stomach,Substantia Nigra,Thymus,Uterus,786-0,A498…
rno-miR-141-3p	TargetScan Human	High (predicted)	ITGA6	integrin, alpha 6	Cancer,Connective Tissue Disorders,Dermatological Diseases and Conditions,Developmental Disorder,Endocrine System Disorders,Gastrointestinal Disease,Hepatic System Disease,Hereditary Disorder,Immunological Disease,Inflammatory Disease,Inflammatory Response,Organismal Injury and Abnormalities,Renal and Urological Disease,Reproductive System Disease,Respiratory Disease,Skeletal and Muscular Disorde…	Plasma Membrane	transmembrane receptor	Agranulocyte Adhesion and Diapedesis,Agrin Interactions at Neuromuscular Junction,Caveolar-mediated Endocytosis Signaling,CDK5 Signaling,Germ Cell-Sertoli Cell Junction Signaling,Granulocyte Adhesion and Diapedesis,Integrin Signaling,Leukocyte Extravasation Signaling,NF-κB Activation by Viruses,Paxillin Signaling,Reelin Signaling in Neurons,Role of Tissue Factor in Cancer,Virus Entry via Endocyti…	Human,Mouse,Rat	Activated helper T cells,Activated Vd1 Gamma-delta T cells,Activated Vd2 Gamma-delta T cells,Adipose,Amygdala,B lymphocytes not otherwise specified,BDCA-3+ dendritic cells,Bladder,Brain,Brainstem,CD56dim NK cells,Central memory cytotoxic T cells,Central memory helper T cells,Cerebellum,Cerebral Cortex,Cytotoxic T cells,Dermis,Dorsal Root Ganglion,Effector memory cytotoxic T cells,Effector memory …
rno-miR-141-3p	TargetScan Human	Moderate (predicted)	ITGAV	integrin, alpha V	Cancer,Cardiovascular Disease,Connective Tissue Disorders,Dermatological Diseases and Conditions,Developmental Disorder,Endocrine System Disorders,Gastrointestinal Disease,Hepatic System Disease,Infectious Disease,Inflammatory Disease,Inflammatory Response,Metabolic Disease,Neurological Disease,Organismal Injury and Abnormalities,Psychological Disorders,Reproductive System Disease,Respiratory Dis…	Plasma Membrane	ion channel	Caveolar-mediated Endocytosis Signaling,Glioma Invasiveness Signaling,IL-8 Signaling,Integrin Signaling,NF-κB Activation by Viruses,Paxillin Signaling,Role of Tissue Factor in Cancer	Human,Mouse,Rat	Activated CD56bright NK cells,Activated helper T cells,Activated Vd1 Gamma-delta T cells,Activated Vd2 Gamma-delta T cells,Adipocytes,Adipose,Adrenal Gland,Amygdala,B lymphocytes not otherwise specified,BDCA-1+ dendritic cells,BDCA-3+ dendritic cells,Bladder,Brain,Brainstem,Cartilage Tissue,Caudate Nucleus,CD34+ cells,Central memory cytotoxic T cells,Central memory helper T cells,Cerebellum,Cereb…
[truncated: 2,700 more rows]
