# Supplementary material for: Age-Related Changes in MicroRNA in the Rat Pituitary and Potential Role in GH Regulation
Source: Int J Mol Sci. 2018 Jul 15;19(7):2058. doi: 10.3390/ijms19072058 (PMC6073141; doi:10.3390/ijms19072058)
Supplement: Supplementary file 1 [file ijms-19-02058-s001.zip › supplementary files/Table S3.xlsx]

## Sheet: Table S3
Table S3. Pathway Predicted targets for the differentially expressed miRNAs （Aging-regulated miRNAs and their association with functional pathways）
Pathway	Count of miRNAs
Actin Cytoskeleton Signaling	15
Acute Phase Response Signaling	15
Adipogenesis pathway	15
AMPK Signaling	15
Angiopoietin Signaling	15
Antioxidant Action of Vitamin C	15
Apoptosis Signaling	15
Axonal Guidance Signaling	15
B Cell Receptor Signaling	15
BMP signaling pathway	15
Breast Cancer Regulation by Stathmin1	15
Calcium Signaling	15
cAMP-mediated signaling	15
Cardiac Hypertrophy Signaling	15
CCR3 Signaling in Eosinophils	15
CD28 Signaling in T Helper Cells	15
Chronic Myeloid Leukemia Signaling	15
Colorectal Cancer Metastasis Signaling	15
CXCR4 Signaling	15
Dopamine-DARPP32 Feedback in cAMP Signaling	15
EGF Signaling	15
Ephrin Receptor Signaling	15
Epithelial Adherens Junction Signaling	15
ErbB Signaling	15
ErbB2-ErbB3 Signaling	15
ERK/MAPK Signaling	15
Erythropoietin Signaling	15
Estrogen Receptor Signaling	15
Factors Promoting Cardiogenesis in Vertebrates	15
FAK Signaling	15
Fc Epsilon RI Signaling	15
Fcγ Receptor-mediated Phagocytosis in Macrophages and Monocytes	15
FGF Signaling	15
Fibroblasts and Endothelial Cells in Rheumatoid Arthritis	15
fMLP Signaling in Neutrophils	15
Gap Junction Signaling	15
GDNF Family Ligand-Receptor Interactions	15
Germ Cell-Sertoli Cell Junction Signaling	15
Glioblastoma Multiforme Signaling	15
Glioma Signaling	15
Glucocorticoid Receptor Signaling	15
GNRH Signaling	15
Growth Hormone Signaling	15
Gαq Signaling	15
Hepatic Fibrosis / Hepatic Stellate Cell Activation	15
Hereditary Breast Cancer Signaling	15
HGF Signaling	15
HMGB1 Signaling	15
Huntington's Disease Signaling	15
iCOS-iCOSL Signaling in T Helper Cells	15
IGF-1 Signaling	15
IL-22 Signaling	15
IL-3 Signaling	15
IL-4 Signaling	15
IL-8 Signaling	15
ILK Signaling	15
Insulin Receptor Signaling	15
Integrin Signaling	15
Leukocyte Extravasation Signaling	15
LPS-stimulated MAPK Signaling	15
Macropinocytosis Signaling	15
Molecular Mechanisms of Cancer	15
Mouse Embryonic Stem Cell Pluripotency	15
mTOR Signaling	15
Myc Mediated Apoptosis Signaling	15
Natural Killer Cell Signaling	15
Neuregulin Signaling	15
NF-κB Signaling	15
NGF Signaling	15
Osteoclasts and Chondrocytes in Rheumatoid Arthritis	15
Ovarian Cancer Signaling	15
p70S6K Signaling	15
PAK Signaling	15
Pancreatic Adenocarcinoma Signaling	15
Paxillin Signaling	15
PEDF Signaling	15
Phospholipase C Signaling	15
PI3K Signaling in B Lymphocytes	15
PI3K/AKT Signaling	15
PPAR Signaling	15
PPARα/RXRα Activation	15
Production of Nitric Oxide and Reactive Oxygen Species in Macrophages	15
Prolactin Signaling	15
Prostate Cancer Signaling	15
Protein Kinase A Signaling	15
PTEN Signaling	15
RANK Signaling in Osteoclasts	15
RAR Activation	15
Regulation of IL-2 Expression in Activated and Anergic T Lymphocytes	15
Regulation of the Epithelial-Mesenchymal Transition Pathway	15
Renin-Angiotensin Signaling	15
RhoGDI Signaling	15
Role of JAK family kinases in IL-6-type Cytokine Signaling	15
Role of Macrophages	15
Role of NANOG in Mammalian Embryonic Stem Cell Pluripotency	15
Role of NFAT in Cardiac Hypertrophy	15
Role of NFAT in Regulation of the Immune Response	15
Role of Osteoblasts	15
Role of Tissue Factor in Cancer	15
SAPK/JNK Signaling	15
Sertoli Cell-Sertoli Cell Junction Signaling	15
Signaling by Rho Family GTPases	15
Sphingosine-1-phosphate Signaling	15
STAT3 Pathway	15
Synaptic Long Term Depression	15
Synaptic Long Term Potentiation	15
T Cell Receptor Signaling	15
Tec Kinase Signaling	15
TGF-β Signaling	15
Thrombopoietin Signaling	15
Tight Junction Signaling	15
Type II Diabetes Mellitus Signaling	15
UVA-Induced MAPK Signaling	15
UVB-Induced MAPK Signaling	15
Virus Entry via Endocytic Pathways	15
Wnt/β-catenin Signaling	15
Xenobiotic Metabolism Signaling	15
14-3-3-mediated Signaling	14
3-phosphoinositide Degradation	14
4-1BB Signaling in T Lymphocytes	14
Acute Myeloid Leukemia Signaling	14
Agrin Interactions at Neuromuscular Junction	14
Aldosterone Signaling in Epithelial Cells	14
Amyloid Processing	14
Androgen Signaling	14
Antiproliferative Role of TOB in T Cell Signaling	14
Aryl Hydrocarbon Receptor Signaling	14
Bladder Cancer Signaling	14
CCR5 Signaling in Macrophages	14
Cdc42 Signaling	14
Cell Cycle: G1/S Checkpoint Regulation	14
Ceramide Signaling	14
Chemokine Signaling	14
Cholecystokinin/Gastrin-mediated Signaling	14
Clathrin-mediated Endocytosis Signaling	14
CNTF Signaling	14
Corticotropin Releasing Hormone Signaling	14
CREB Signaling in Neurons	14
Cyclins and Cell Cycle Regulation	14
Dendritic Cell Maturation	14
EIF2 Signaling	14
Endometrial Cancer Signaling	14
Endothelin-1 Signaling	14
eNOS Signaling	14
Ephrin A Signaling	14
Ephrin B Signaling	14
ErbB4 Signaling	14
ERK5 Signaling	14
Estrogen-Dependent Breast Cancer Signaling	14
FLT3 Signaling in Hematopoietic Progenitor Cells	14
G Beta Gamma Signaling	14
GM-CSF Signaling	14
G-Protein Coupled Receptor Signaling	14
Gustation Pathway	14
Gα12/13 Signaling	14
Gαi Signaling	14
Gαs Signaling	14
Hepatic Cholestasis	14
HER-2 Signaling in Breast Cancer	14
HIF1α Signaling	14
HIPPO signaling	14
Human Embryonic Stem Cell Pluripotency	14
Hypoxia Signaling in the Cardiovascular System	14
IL-12 Signaling and Production in Macrophages	14
IL-15 Signaling	14
IL-17 Signaling	14
IL-17A Signaling in Airway Cells	14
IL-2 Signaling	14
IL-6 Signaling	14
Induction of Apoptosis by HIV1	14
Inhibition of Angiogenesis by TSP1	14
JAK/Stat Signaling	14
Leptin Signaling in Obesity	14
LPS/IL-1 Mediated Inhibition of RXR Function	14
Lymphotoxin β Receptor Signaling	14
Melanocyte Development and Pigmentation Signaling	14
Melanoma Signaling	14
Melatonin Signaling	14
Mitochondrial Dysfunction	14
Neuropathic Pain Signaling In Dorsal Horn Neurons	14
NF-κB Activation by Viruses	14
Nitric Oxide Signaling in the Cardiovascular System	14
nNOS Signaling in Neurons	14
Non-Small Cell Lung Cancer Signaling	14
NRF2-mediated Oxidative Stress Response	14
Oncostatin M Signaling	14
P2Y Purigenic Receptor Signaling Pathway	14
p53 Signaling	14
PCP pathway	14
PDGF Signaling	14
PKCθ Signaling in T Lymphocytes	14
PXR/RXR Activation	14
Pyridoxal 5'-phosphate Salvage Pathway	14
Rac Signaling	14
Regulation of eIF4 and p70S6K Signaling	14
Relaxin Signaling	14
Renal Cell Carcinoma Signaling	14
RhoA Signaling	14
Role of IL-17A in Arthritis	14
Role of JAK1	14
Role of JAK1 and JAK3 in γc Cytokine Signaling	14
Role of MAPK Signaling in the Pathogenesis of Influenza	14
Role of Pattern Recognition Receptors in Recognition of Bacteria and Viruses	14
Role of Wnt/GSK-3β Signaling in the Pathogenesis of Influenza	14
Salvage Pathways of Pyrimidine Ribonucleotides	14
Small Cell Lung Cancer Signaling	14
Sperm Motility	14
Superpathway of Inositol Phosphate Compounds	14
Systemic Lupus Erythematosus Signaling	14
Telomerase Signaling	14
Thrombin Signaling	14
TR/RXR Activation	14
UVC-Induced MAPK Signaling	14
VDR/RXR Activation	14
VEGF Family Ligand-Receptor Interactions	14
VEGF Signaling	14
Wnt/Ca+ pathway	14
α-Adrenergic Signaling	14
3-phosphoinositide Biosynthesis	13
Actin Nucleation by ARP-WASP Complex	13
Antiproliferative Role of Somatostatin Receptor 2	13
April Mediated Signaling	13
ATM Signaling	13
B Cell Activating Factor Signaling	13
Calcium-induced T Lymphocyte Apoptosis	13
Cardiac β-adrenergic Signaling	13
CD27 Signaling in Lymphocytes	13
CD40 Signaling	13
Cellular Effects of Sildenafil (Viagra)	13
GPCR-Mediated Nutrient Sensing in Enteroendocrine Cells	13
IL-1 Signaling	13
IL-10 Signaling	13
MIF Regulation of Innate Immunity	13
Netrin Signaling	13
Neuroprotective Role of THOP1 in Alzheimer's Disease	13
Neurotrophin/TRK Signaling	13
Nur77 Signaling in T Lymphocytes	13
p38 MAPK Signaling	13
Protein Ubiquitination Pathway	13
Reelin Signaling in Neurons	13
Regulation of Cellular Mechanics by Calpain Protease	13
Role of IL-17F in Allergic Inflammatory Airway Diseases	13
Role of PI3K/AKT Signaling in the Pathogenesis of Influenza	13
Role of PKR in Interferon Induction and Antiviral Response	13
Semaphorin Signaling in Neurons	13
Thyroid Cancer Signaling	13
TREM1 Signaling	13
Type I Diabetes Mellitus Signaling	13
Activation of IRF by Cytosolic Pattern Recognition Receptors	12
Agranulocyte Adhesion and Diapedesis	12
Amyotrophic Lateral Sclerosis Signaling	12
Basal Cell Carcinoma Signaling	12
CDK5 Signaling	12
Cell Cycle Regulation by BTG Family Proteins	12
Cell Cycle: G2/M DNA Damage Checkpoint Regulation	12
D-myo-inositol (1,4,5,6)-Tetrakisphosphate Biosynthesis	12
D-myo-inositol (3,4,5,6)-tetrakisphosphate Biosynthesis	12
D-myo-inositol-5-phosphate Metabolism	12
Docosahexaenoic Acid (DHA) Signaling	12
Dopamine Receptor Signaling	12
FcγRIIB Signaling in B Lymphocytes	12
FXR/RXR Activation	12
Glioma Invasiveness Signaling	12
Granulocyte Adhesion and Diapedesis	12
IL-17A Signaling in Fibroblasts	12
IL-17A Signaling in Gastric Cells	12
LXR/RXR Activation	12
MIF-mediated Glucocorticoid Regulation	12
Role of BRCA1 in DNA Damage Response	12
Sonic Hedgehog Signaling	12
Superpathway of D-myo-inositol (1,4,5)-trisphosphate Metabolism	12
Toll-like Receptor Signaling	12
Circadian Rhythm Signaling	11
CTLA4 Signaling in Cytotoxic T Lymphocytes	11
Death Receptor Signaling	11
D-myo-inositol (1,3,4)-trisphosphate Biosynthesis	11
Estrogen-mediated S-phase Entry	11
GABA Receptor Signaling	11
GADD45 Signaling	11
GPCR-Mediated Integration of Enteroendocrine Signaling Exemplified by an L Cell	11
iNOS Signaling	11
Mechanisms of Viral Exit from Host Cells	11
Parkinson's Signaling	11
Polyamine Regulation in Colon Cancer	11
Regulation of Actin-based Motility by Rho	11
Role of CHK Proteins in Cell Cycle Checkpoint Control	11
Role of JAK2 in Hormone-like Cytokine Signaling	11
Serotonin Receptor Signaling	11
Atherosclerosis Signaling	10
Cardiomyocyte Differentiation via BMP Receptors	10
Caveolar-mediated Endocytosis Signaling	10
D-myo-inositol (1,4,5)-trisphosphate Degradation	10
IL-9 Signaling	10
Interferon Signaling	10
TNFR1 Signaling	10
Transcriptional Regulatory Network in Embryonic Stem Cells	10
TWEAK Signaling	10
Unfolded protein response	10
Cytotoxic T Lymphocyte-mediated Apoptosis of Target Cells	9
DNA Methylation and Transcriptional Repression Signaling	9
Inhibition of Matrix Metalloproteases	9
Mitotic Roles of Polo-Like Kinase	9
Notch Signaling	9
Nucleotide Excision Repair Pathway	9
OX40 Signaling Pathway	9
Remodeling of Epithelial Adherens Junctions	9
Role of Oct4 in Mammalian Embryonic Stem Cell Pluripotency	9
T Helper Cell Differentiation	9
Tumoricidal Function of Hepatic Natural Killer Cells	9
Altered T Cell and B Cell Signaling in Rheumatoid Arthritis	8
DNA damage-induced 14-3-3σ Signaling	8
Glutamate Receptor Signaling	8
JAK2 and TYK2 in Interferon Signaling	8
MSP-RON Signaling Pathway	8
Retinoic acid Mediated Apoptosis Signaling	8
Role of p14/p19ARF in Tumor Suppression	8
Role of RIG1-like Receptors in Antiviral Innate Immunity	8
TNFR2 Signaling	8
Triacylglycerol Biosynthesis	8
Dermatan Sulfate Degradation (Metazoa)	7
Endoplasmic Reticulum Stress Pathway	7
IL-15 Production	7
Oxidative Phosphorylation	7
Phototransduction Pathway	7
tRNA Splicing	7
1D-myo-inositol Hexakisphosphate Biosynthesis II (Mammalian)	6
Assembly of RNA Polymerase II Complex	6
Cell Cycle Control of Chromosomal Replication	6
Fatty Acid β-oxidation I	6
Granzyme B Signaling	6
Hematopoiesis from Pluripotent Stem Cells	6
Maturity Onset Diabetes of Young (MODY) Signaling	6
Serotonin Degradation	6
Stearate Biosynthesis I (Animals)	6
Superpathway of Cholesterol Biosynthesis	6
Tryptophan Degradation X (Mammalian, via Tryptamine)	6
Calcium Transport I	5
Chondroitin Sulfate Biosynthesis	5
Chondroitin Sulfate Biosynthesis (Late Stages)	5
Chondroitin Sulfate Degradation (Metazoa)	5
Coagulation System	5
Dermatan Sulfate Biosynthesis	5
DNA Double-Strand Break Repair by Non-Homologous End Joining	5
Dopamine Degradation	5
Eicosanoid Signaling	5
Fatty Acid Activation	5
Fatty Acid α-oxidation	5
Intrinsic Prothrombin Activation Pathway	5
Melatonin Degradation I	5
Mitochondrial L-carnitine Shuttle Pathway	5
Noradrenaline and Adrenaline Degradation	5
Primary Immunodeficiency Signaling	5
Putrescine Degradation III	5
Sphingomyelin Metabolism	5
Superpathway of Melatonin Degradation	5
TCA Cycle II (Eukaryotic)	5
Vitamin-C Transport	5
γ-linolenate Biosynthesis II (Animals)	5
Bile Acid Biosynthesis	4
CDP-diacylglycerol Biosynthesis I	4
Cholesterol Biosynthesis I	4
Cholesterol Biosynthesis II (via 24,25-dihydrolanosterol)	4
Cholesterol Biosynthesis III (via Desmosterol)	4
Crosstalk between Dendritic Cells and Natural Killer Cells	4
Glycolysis I	4
Neutral Pathway	4
nNOS Signaling in Skeletal Muscle Cells	4
Phosphatidylglycerol Biosynthesis II (Non-plastidic)	4
Retinoate Biosynthesis I	4
Role of Lipids/Lipid Rafts in the Pathogenesis of Influenza	4
Superoxide Radicals Degradation	4
Superpathway of Citrulline Metabolism	4
UDP-N-acetyl-D-glucosamine Biosynthesis II	4
Biotin-carboxyl Carrier Protein Assembly	3
Chondroitin and Dermatan Biosynthesis	3
Citrulline-Nitric Oxide Cycle	3
CMP-N-acetylneuraminate Biosynthesis I (Eukaryotes)	3
Colanic Acid Building Blocks Biosynthesis	3
Communication between Innate and Adaptive Immune Cells	3
Complement System	3
DNA Double-Strand Break Repair by Homologous Recombination	3
Embryonic Stem Cell Differentiation into Cardiac Lineages	3
Ethanol Degradation II	3
Ethanol Degradation IV	3
Extrinsic Prothrombin Activation Pathway	3
G Protein Signaling Mediated by Tubby	3
GDP-mannose Biosynthesis	3
Gluconeogenesis I	3
Glutamate Degradation III (via 4-aminobutyrate)	3
Heparan Sulfate Biosynthesis	3
Heparan Sulfate Biosynthesis (Late Stages)	3
Histamine Degradation	3
Ketogenesis	3
Lipid Antigen Presentation by CD1	3
Lysine Degradation II	3
Mevalonate Pathway I	3
Myo-inositol Biosynthesis	3
NAD Salvage Pathway II	3
Nicotine Degradation II	3
Nicotine Degradation III	3
Oxidative Ethanol Degradation III	3
Phospholipases	3
Prostanoid Biosynthesis	3
RAN Signaling	3
Role of Cytokines in Mediating Communication between Immune Cells	3
Superpathway of Geranylgeranyldiphosphate Biosynthesis I (via Mevalonate)	3
Telomere Extension by Telomerase	3
Thyroid Hormone Metabolism II (via Conjugation and/or Degradation)	3
tRNA Charging	3
UDP-N-acetyl-D-galactosamine Biosynthesis II	3
4-aminobutyrate Degradation I	2
Acetyl-CoA Biosynthesis I (Pyruvate Dehydrogenase Complex)	2
Acyl-CoA Hydrolysis	2
Antigen Presentation Pathway	2
Assembly of RNA Polymerase I Complex	2
B Cell Development	2
Branched-chain α-keto acid Dehydrogenase Complex	2
Catecholamine Biosynthesis	2
Dermatan Sulfate Biosynthesis (Late Stages)	2
Differential Regulation of Cytokine Production in Intestinal Epithelial Cells by IL-17A and IL-17F	2
Differential Regulation of Cytokine Production in Macrophages and T Helper Cells by IL-17A and IL-17F	2
Glutaryl-CoA Degradation	2
Graft-versus-Host Disease Signaling	2
Granzyme A Signaling	2
Hematopoiesis from Multipotent Stem Cells	2
Heme Biosynthesis from Uroporphyrinogen-III I	2
Heme Biosynthesis II	2
Inositol Pyrophosphates Biosynthesis	2
Isoleucine Degradation I	2
Ketolysis	2
Melatonin Degradation II	2
Molybdenum Cofactor Biosynthesis	2
NAD Phosphorylation and Dephosphorylation	2
Oleate Biosynthesis II (Animals)	2
Phenylalanine Degradation IV (Mammalian, via Side Chain)	2
Phosphatidylcholine Biosynthesis I	2
Pyrimidine Ribonucleotides De Novo Biosynthesis	2
Pyrimidine Ribonucleotides Interconversion	2
Retinol Biosynthesis	2
Role of Hypercytokinemia/hyperchemokinemia in the Pathogenesis of Influenza	2
Salvage Pathways of Pyrimidine Deoxyribonucleotides	2
Superpathway of Methionine Degradation	2
Thioredoxin Pathway	2
Thyroid Hormone Metabolism I (via Deiodination)	2
Thyronamine and Iodothyronamine Metabolism	2
Triacylglycerol Degradation	2
Tryptophan Degradation III (Eukaryotic)	2
Valine Degradation I	2
Zymosterol Biosynthesis	2
10-methenyltetrahydrofolate	1
1D-myo-inositol Hexakisphosphate Biosynthesis V (from Ins(1,3,4)P3)	1
2-ketoglutarate Dehydrogenase Complex	1
2-oxobutanoate Degradation I	1
5-aminoimidazole Ribonucleotide Biosynthesis I	1
Acetone Degradation I (to Methylglyoxal)	1
Adenosine Nucleotides Degradation II	1
Allograft Rejection Signaling	1
Androgen Biosynthesis	1
Arginine Biosynthesis IV	1
Assembly of RNA Polymerase III Complex	1
Autoimmune Thyroid Disease Signaling	1
BER pathway	1
Bupropion Degradation	1
Ceramide Biosynthesis	1
Choline Biosynthesis III	1
Cysteine Biosynthesis III (mammalia)	1
Diphthamide Biosynthesis	1
D-mannose Degradation	1
D-myo-inositol (1,4,5)-Trisphosphate Biosynthesis	1
Epoxysqualene Biosynthesis	1
Estrogen Biosynthesis	1
Fatty Acid Biosynthesis Initiation II	1
Folate Transformations I	1
Glucocorticoid Biosynthesis	1
Glutamate Biosynthesis II	1
Glutamate Degradation X	1
Glutamate Dependent Acid Resistance	1
Glutamine Biosynthesis I	1
Glutathione Redox Reactions I	1
Glycine Cleavage Complex	1
Glycogen Degradation II	1
Glycogen Degradation III	1
Guanosine Nucleotides Degradation III	1
Heme Degradation	1
Methionine Degradation I (to Homocysteine)	1
Methylglyoxal Degradation III	1
Mineralocorticoid Biosynthesis	1
Mismatch Repair in Eukaryotes	1
N-acetylglucosamine Degradation II	1
NADH Repair	1
Palmitate Biosynthesis I (Animals)	1
Pentose Phosphate Pathway	1
Pentose Phosphate Pathway (Non-oxidative Branch)	1
Phosphatidylethanolamine Biosynthesis II	1
PRPP Biosynthesis I	1
Purine Nucleotides De Novo Biosynthesis II	1
Purine Nucleotides Degradation II (Aerobic)	1
Pyrimidine Deoxyribonucleotides De Novo Biosynthesis I	1
Rapoport-Luebering Glycolytic Shunt	1
Retinoate Biosynthesis II	1
Serotonin and Melatonin Biosynthesis	1
Sucrose Degradation V (Mammalian)	1
Tetrahydrofolate Salvage from 5	1
The Visual Cycle	1
Thymine Degradation	1
Thyroid Hormone Biosynthesis	1
Ubiquinol-10 Biosynthesis (Eukaryotic)	1
UDP-D-xylose and UDP-D-glucuronate Biosynthesis	1
Uracil Degradation II (Reductive)	1
Urate Biosynthesis/Inosine 5'-phosphate Degradation	1
Urea Cycle	1
