# Supplementary material for: Age-Related Changes in MicroRNA in the Rat Pituitary and Potential Role in GH Regulation
Source: Int J Mol Sci. 2018 Jul 15;19(7):2058. doi: 10.3390/ijms19072058 (PMC6073141; doi:10.3390/ijms19072058)
Supplement: Supplementary file 1 [file ijms-19-02058-s001.zip › supplementary files/Table S4.xlsx]

## Sheet: Table S4
Table S4. Pearson's correlation coefficient analysis of each pair of miRNA and corresponding predicted target gene
		Relative miRNA level detected by qRT-PCR					Relative mRNA level detected by qRT-PCR
R	Reporter Name	D7	D40	D90	D250	Gene Symbol	D7	D40	D90	D250
-0.996011	miR-141-3p	1	1.76823	1.99603	1.80799	IGF1R	1	0.33116	0.195166	0.275938
-0.991725	miR-141-3p	1	1.76823	1.99603	1.80799	SOCS7	1	0.306437	0.232781	0.329986
-0.989315	miR-141-3p	1	1.76823	1.99603	1.80799	GNA13	1	0.50628	0.385862	0.408991
-0.985659	miR-141-3p	1	1.76823	1.99603	1.80799	MAPK1	1	0.580983	0.370759	0.43991
-0.978572	miR-141-3p	1	1.76823	1.99603	1.80799	SOX5	1	0.612764	0.434625	0.459918
-0.974056	miR-183-5p	1	0.114845	0.180277	0.135556	MAPK9	1	2.6717	2.26576	2.2554
-0.973535	miR-141-3p	1	1.76823	1.99603	1.80799	ASPH	1	0.683687	0.611114	0.756148
-0.971484	miR-29a-3p	1	5.42639	8.67076	8.2746	GNA13	1	0.50628	0.385862	0.408991
-0.947013	miR-384-3p	1	1.54315	2.5134	2.1618	MAPK1	1	0.580983	0.370759	0.43991
-0.932767	miR-29a-3p	1	5.42639	8.67076	8.2746	POU2F1	1	0.922211	0.759542	0.847858
-0.925086	miR-29a-3p	1	5.42639	8.67076	8.2746	SOCS7	1	0.306437	0.232781	0.329986
-0.922862	Q97	1	1.5269	1.4603	1.72267	PRKCA	1	0.380875	0.133541	0.127171
-0.913919	miR-106b-5p	1	0.32182	0.213927	0.192733	MAPK9	1	2.6717	2.26576	2.2554
-0.899646	miR-183-5p	1	0.114845	0.180277	0.135556	TCF4	1	11.8364	9.37684	6.71499
-0.899138	miR-7b	1	1.7725	1.48274	1.64064	SOCS7	1	0.306437	0.232781	0.329986
-0.894303	miR-384-3p	1	1.54315	2.5134	2.1618	GNA13	1	0.50628	0.385862	0.408991
-0.889582	Q97	1	1.5269	1.4603	1.72267	SOCS7	1	0.306437	0.232781	0.329986
-0.874073	miR-29a-3p	1	5.42639	8.67076	8.2746	IRS1	1	0.852833	0.67298	0.844954
-0.872848	miR-7b	1	1.7725	1.48274	1.64064	IGF1R	1	0.33116	0.195166	0.275938
-0.870907	miR-29a-3p	1	5.42639	8.67076	8.2746	ASPH	1	0.683687	0.611114	0.756148
-0.856369	miR-106b-5p	1	0.32182	0.213927	0.192733	NFAT5	1	2.70314	2.2628	2.0308
-0.849136	miR-29a-3p	1	5.42639	8.67076	8.2746	PTEN	1	0.995594	0.673589	0.771686
-0.822089	miR-106b-5p	1	0.32182	0.213927	0.192733	TCF4	1	11.8364	9.37684	6.71499
-0.816025	miR-183-5p	1	0.114845	0.180277	0.135556	FOXO1	1	3.03534	1.96138	1.94113
-0.807157	miR-216a-5p	1	16.0122	10.7663	12.4032	PRKCA	1	0.380875	0.133541	0.127171
-0.79472	miR-216a-5p	1	16.0122	10.7663	12.4032	SOX5	1	0.612764	0.434625	0.459918
-0.784558	miR-7b	1	1.7725	1.48274	1.64064	MAPK1	1	0.580983	0.370759	0.43991
-0.720888	miR-29a-3p	1	5.42639	8.67076	8.2746	CREB5	1	1.17824	0.552407	0.522482
-0.709262	miR-141-3p	1	1.76823	1.99603	1.80799	PTEN	1	0.995594	0.673589	0.771686
-0.612465	miR-183-5p	1	0.114845	0.180277	0.135556	ACVR2B	1	1.86966	1.44333	1.09475
-0.571753	miR-15b-5p	1	0.773859	0.299423	0.290466	MAPK9	1	2.6717	2.26576	2.2554
-0.536554	miR-7b	1	1.7725	1.48274	1.64064	IRS1	1	0.852833	0.67298	0.844954
-0.477576	miR-15b-5p	1	0.773859	0.299423	0.290466	NFAT5	1	2.70314	2.2628	2.0308
-0.459649	Q97	1	1.5269	1.4603	1.72267	CREB5	1	1.17824	0.552407	0.522482
-0.340572	miR-29a-3p	1	5.42639	8.67076	8.2746	NR3C1	1	1.53773	0.676118	0.93034
-0.335925	miR-204-5p	1	0.999679	0.531623	0.619321	MAPK9	1	2.6717	2.26576	2.2554
-0.322548	miR-495	1	1.37265	0.546548	0.704599	TGFB2	1	5.23048	6.46228	5.23517
-0.253635	miR-216a-5p	1	16.0122	10.7663	12.4032	PTEN	1	0.995594	0.673589	0.771686
-0.253032	miR-204-5p	1	0.999679	0.531623	0.619321	NFAT5	1	2.70314	2.2628	2.0308
-0.234197	miR-204-5p	1	0.999679	0.531623	0.619321	TCF4	1	11.8364	9.37684	6.71499
-0.21587	miR-15b-5p	1	0.773859	0.299423	0.290466	FOXO1	1	3.03534	1.96138	1.94113
-0.123617	miR-183-5p	1	0.114845	0.180277	0.135556	NR3C1	1	1.53773	0.676118	0.93034
-0.122321	miR-141-3p	1	1.76823	1.99603	1.80799	NR3C1	1	1.53773	0.676118	0.93034
0.00328518	miR-15b-5p	1	0.773859	0.299423	0.290466	ACVR2B	1	1.86966	1.44333	1.09475
0.0189633	miR-374-5p	1	1.34958	1.05446	0.736142	SOS1	1	0.590386	0.524371	0.527135
0.0248799	miR-132-3p	1	2.24981	0.854486	0.985858	SOX5	1	0.612764	0.434625	0.459918
0.0255089	miR-132-3p	1	2.24981	0.854486	0.985858	MAPK1	1	0.580983	0.370759	0.43991
0.135462	miR-132-3p	1	2.24981	0.854486	0.985858	TGFB2	1	5.23048	6.46228	5.23517
0.152378	miR-384-3p	1	1.54315	2.5134	2.1618	ACVR2B	1	1.86966	1.44333	1.09475
0.159254	miR-374-5p	1	1.34958	1.05446	0.736142	PRKCA	1	0.380875	0.133541	0.127171
0.169477	miR-495	1	1.37265	0.546548	0.704599	NFAT5	1	2.70314	2.2628	2.0308
0.176655	miR-495	1	1.37265	0.546548	0.704599	TCF4	1	11.8364	9.37684	6.71499
0.223933	miR-495	1	1.37265	0.546548	0.704599	ASPH	1	0.683687	0.611114	0.756148
0.30108	miR-495	1	1.37265	0.546548	0.704599	SOS1	1	0.590386	0.524371	0.527135
0.304178	miR-495	1	1.37265	0.546548	0.704599	IGF1R	1	0.33116	0.195166	0.275938
0.403094	miR-216a-5p	1	16.0122	10.7663	12.4032	NR3C1	1	1.53773	0.676118	0.93034
0.41628	miR-140-3p	1	1.15304	0.569828	0.596529	ACVR2B	1	1.86966	1.44333	1.09475
0.442853	miR-495	1	1.37265	0.546548	0.704599	PRKCA	1	0.380875	0.133541	0.127171
0.457366	miR-495	1	1.37265	0.546548	0.704599	FOXO1	1	3.03534	1.96138	1.94113
0.461168	miR-495	1	1.37265	0.546548	0.704599	SOX5	1	0.612764	0.434625	0.459918
0.489404	miR-374-5p	1	1.34958	1.05446	0.736142	PTEN	1	0.995594	0.673589	0.771686
0.512223	miR-106b-5p	1	0.32182	0.213927	0.192733	CREB5	1	1.17824	0.552407	0.522482
0.529033	miR-495	1	1.37265	0.546548	0.704599	ACVR2B	1	1.86966	1.44333	1.09475
0.53063	miR-374-5p	1	1.34958	1.05446	0.736142	TCF4	1	11.8364	9.37684	6.71499
0.54903	miR-495	1	1.37265	0.546548	0.704599	IRS1	1	0.852833	0.67298	0.844954
0.563792	miR-384-3p	1	1.54315	2.5134	2.1618	NFAT5	1	2.70314	2.2628	2.0308
0.586248	miR-204-5p	1	0.999679	0.531623	0.619321	ASPH	1	0.683687	0.611114	0.756148
0.592861	miR-132-3p	1	2.24981	0.854486	0.985858	NFAT5	1	2.70314	2.2628	2.0308
0.601335	miR-374-5p	1	1.34958	1.05446	0.736142	FOXO1	1	3.03534	1.96138	1.94113
0.610595	miR-204-5p	1	0.999679	0.531623	0.619321	SOCS7	1	0.306437	0.232781	0.329986
0.623547	miR-384-3p	1	1.54315	2.5134	2.1618	MAPK9	1	2.6717	2.26576	2.2554
0.643618	miR-140-3p	1	1.15304	0.569828	0.596529	MAPK1	1	0.580983	0.370759	0.43991
0.671604	miR-106b-5p	1	0.32182	0.213927	0.192733	PTEN	1	0.995594	0.673589	0.771686
0.671738	miR-374-5p	1	1.34958	1.05446	0.736142	NR3C1	1	1.53773	0.676118	0.93034
0.67505	miR-204-5p	1	0.999679	0.531623	0.619321	SOS1	1	0.590386	0.524371	0.527135
0.700508	miR-29a-3p	1	5.42639	8.67076	8.2746	NFAT5	1	2.70314	2.2628	2.0308
0.717847	miR-15b-5p	1	0.773859	0.299423	0.290466	ASPH	1	0.683687	0.611114	0.756148
0.720365	miR-495	1	1.37265	0.546548	0.704599	POU2F1	1	0.922211	0.759542	0.847858
0.74459	miR-183-5p	1	0.114845	0.180277	0.135556	IRS1	1	0.852833	0.67298	0.844954
0.770397	miR-374-5p	1	1.34958	1.05446	0.736142	CREB5	1	1.17824	0.552407	0.522482
0.7754	miR-204-5p	1	0.999679	0.531623	0.619321	NR3C1	1	1.53773	0.676118	0.93034
0.775714	miR-132-3p	1	2.24981	0.854486	0.985858	CREB5	1	1.17824	0.552407	0.522482
0.795137	miR-204-5p	1	0.999679	0.531623	0.619321	MAPK1	1	0.580983	0.370759	0.43991
0.806179	miR-132-3p	1	2.24981	0.854486	0.985858	FOXO1	1	3.03534	1.96138	1.94113
0.809569	miR-15b-5p	1	0.773859	0.299423	0.290466	IRS1	1	0.852833	0.67298	0.844954
0.822931	miR-132-3p	1	2.24981	0.854486	0.985858	ACVR2B	1	1.86966	1.44333	1.09475
0.825663	miR-106b-5p	1	0.32182	0.213927	0.192733	POU2F1	1	0.922211	0.759542	0.847858
0.83261	miR-7b	1	1.7725	1.48274	1.64064	TGFB2	1	5.23048	6.46228	5.23517
0.838098	miR-15b-5p	1	0.773859	0.299423	0.290466	IGF1R	1	0.33116	0.195166	0.275938
0.848372	miR-15b-5p	1	0.773859	0.299423	0.290466	SOS1	1	0.590386	0.524371	0.527135
0.852937	miR-374-5p	1	1.34958	1.05446	0.736142	ACVR2B	1	1.86966	1.44333	1.09475
0.855863	miR-141-3p	1	1.76823	1.99603	1.80799	TCF4	1	11.8364	9.37684	6.71499
0.864807	miR-140-3p	1	1.15304	0.569828	0.596529	NR3C1	1	1.53773	0.676118	0.93034
0.870809	miR-15b-5p	1	0.773859	0.299423	0.290466	GNA13	1	0.50628	0.385862	0.408991
0.882794	miR-15b-5p	1	0.773859	0.299423	0.290466	CREB5	1	1.17824	0.552407	0.522482
0.902403	miR-495	1	1.37265	0.546548	0.704599	PTEN	1	0.995594	0.673589	0.771686
0.904886	miR-7b	1	1.7725	1.48274	1.64064	TCF4	1	11.8364	9.37684	6.71499
0.924627	miR-15b-5p	1	0.773859	0.299423	0.290466	SOX5	1	0.612764	0.434625	0.459918
0.925636	miR-204-5p	1	0.999679	0.531623	0.619321	POU2F1	1	0.922211	0.759542	0.847858
0.93035	miR-15b-5p	1	0.773859	0.299423	0.290466	POU2F1	1	0.922211	0.759542	0.847858
0.942403	miR-183-5p	1	0.114845	0.180277	0.135556	PRKCA	1	0.380875	0.133541	0.127171
0.944583	miR-29a-3p	1	5.42639	8.67076	8.2746	TGFB2	1	5.23048	6.46228	5.23517
0.954222	miR-495	1	1.37265	0.546548	0.704599	CREB5	1	1.17824	0.552407	0.522482
0.958443	miR-204-5p	1	0.999679	0.531623	0.619321	CREB5	1	1.17824	0.552407	0.522482
0.970387	miR-99b-5p	1	0.590452	0.325157	0.396448	IGF1R	1	0.33116	0.195166	0.275938
0.97162	miR-183-5p	1	0.114845	0.180277	0.135556	GNA13	1	0.50628	0.385862	0.408991
0.980821	miR-106b-5p	1	0.32182	0.213927	0.192733	MAPK1	1	0.580983	0.370759	0.43991
0.984695	miR-106b-5p	1	0.32182	0.213927	0.192733	SOCS7	1	0.306437	0.232781	0.329986
0.999151	miR-141-3p	1	1.76823	1.99603	1.80799	TGFB2	1	5.23048	6.46228	5.23517
0.99954	miR-106b-5p	1	0.32182	0.213927	0.192733	SOS1	1	0.590386	0.524371	0.527135
