# Supplementary material for: Age-Related Changes in MicroRNA in the Rat Pituitary and Potential Role in GH Regulation
Source: Int J Mol Sci. 2018 Jul 15;19(7):2058. doi: 10.3390/ijms19072058 (PMC6073141; doi:10.3390/ijms19072058)
Supplement: Supplementary file 1 [file ijms-19-02058-s001.zip › supplementary files/Table S5.xlsx]

## Sheet: Table S5
Table S5. Primers for quantitative PCR
Accession	Reporter Name	Sequence(5'to3')	Product Length(bp)	Tm(℃)
MIMAT0000825	rno-miR-106b-5p	GCTAAAGTGCTGACAGTGCAGAT	80	58
MIMAT0000838	rno-miR-132-3p	TAACAGTCTACAGCCATGGTCG	79	58
MIMAT0000574	rno-miR-140-3p	TACCACAGGGTAGAACCACGG	78	58
MIMAT0000846	rno-miR-141-3p	GCTAACACTGTCTGGTAAAGATGG	81	58
MIMAT0000784	rno-miR-15b-5p	CTAGCAGCACATCATGGTTTACA	80	58
MIMAT0000860	rno-miR-183-5p	GCTATGGCACTGGTAGAATTCACT	81	58
MIMAT0000877	rno-miR-204-5p	TTCCCTTTGTCATCCTATGCCT	79	58
MIMAT0000886	rno-miR-216a-5p	TAATCTCAGCTGGCAACTGTGA	79	58
MIMAT0000802	rno-miR-29a-3p	TAGCACCATCTGAAATCGGTTA	79	58
MIMAT0003208	rno-miR-374-5p	TGCATATAATACAACCTGCTAAGTG	82	58
MIMAT0005310	rno-miR-384-3p	TGCATTCCTAGAAATTGTTCACAAT	82	58
MIMAT0005320	rno-miR-495	CAAACAAACATGGTGCACTTCTT	80	58
MIMAT0000780	rno-miR-7b	TGGAAGACTTGTGATTTTGTTGT	80	58
MIMAT0000821	rno-miR-99b-5p	CACCCGTAGAACCGACCTTG	79	58
MIMAT0003499	Q97	GGAGGCAGAGGCAGGAGG	76	58
K00784	U6	F: TGCTTCGGCAGCACATATAC	87	58
		R: TTCACGAATTTGCGTGTCAT
NM_031554	Acvr2b	F: GGGCTCCCTCACGGATTACC	119	58
		R: CACGACACCACGGCACATC
XM_008763567	Asph	F: ACAGTGCCAAGAAGGTTTACG	246	58
		R: TCTTGTGCCCAAGTTCATACC
NM_001134621	CREB5	F: GCCAGATCGGGCCTGTCCC	136	58
		R: GGCATCAAGACGGCAGAAGATC
NM_001191846	Foxo1	F: AGCAAATCAAGTTATGGAGGAT	184	58
		R: CTGGCATGACTGAGTTAGGG
NM_001013119	Gna13	F: GTCACAGCAAGATATTCTGCTTGC	217	58
		R: GTTGGTCAGGCGGTCCTCC
NM_052807	Igf1r	F: GTCCTTCGGGATGGTCTATGA	190	56
		R: TTGGGATACTACACCCAGCAA
NM_012969	Irs1	F: CATGGACAAACGGAGTAGGG	393	62
		R: CGCTAGACTCTGGCCTAGCC
NM_053842	Mapk1	F: GAGCAGTATTATGACCCAAGTGA	196	58
		R: GGACACCGACATCTGAACG
NM_017322	Mapk9	F: TGTTTTGGATGGAGCCTGTG	203	62
		R: TCAGCATTTGCCTACAGAGGTC
NM_001107425	Nfat5	F: GAAAAGCAGTTAACCGGTAACAC	292	58
		R: CACAATCTCGTCGTTTGACCC
NM_012576	Nr3c1	F: TGAAATGGGCAAAGGCGATAC	234	58
		R: ATTCAGAGGAGACAAACAGCATGTG
NM_001100639	Pou2f1	F: ACAGAGCCAGACAACACCAAAG	180	58
		R: GTGGTTTGGCTGAAGTCATTTC
NM_001105713	Prkca	F: TCGGACGACACGGAATGAC	106	62
		R: ACCCTCCTCTTGGTTGAGC
NM_031606	Pten	F: AGACCATAACCCACCACAGC	127	58
		R: TACACCAGTCCGTCCTTTCC
XM_006247484	Socs7	F: AGCCTCGATATTCCCGTCAC	130	56
		R: CTCATTCCTTCTAACAAGACCTCC
NM_001100716	Sos1	F: CTATGCTCGGGATGTTCTGC	103	62
		R: GAAGCCTTCACCTATGGACTGC
NM_001271267	Sox5	F: CCATTGATGATTCCCGTGTTC	387	62
		R: GTCAGAGGTCTTGGGCTTAGCT
NM_053369	Tcf4	F: CTGGAGCAGCAAGTGCGAG	243	58
		R: AGCAGTGTTTATGTGGGTTTAGG
NM_031131	Tgfb2	F: AGACCTAACATCTCCAACCCAG	423	58
		R: TTATCCTGCACATTCCTAAAGC
NM_001034848	Gh1	F: GACTCCCTGGCTCCTGACC	168	58
		R: ATGTAGGCACGCTCGAACTC
NM_012850	Ghrhr	F: CACGCAAATGGTATGGC	251	58
		R: CTGAGAAAGTCGGAGGTTG
NM_019348	Sstr2	F: AGGCATGTTTGACTTTGTGG	174	60
		R: CGGGATTTGTCCTGCTTACT
NM_031144	β-actin	F: TCGTGCGTGACATTAAAGAG	134	58
		R: ATTGCCGATAGTGATGACCT
