# Supplementary material for: Age-Related Changes in MicroRNA in the Rat Pituitary and Potential Role in GH Regulation
Source: Int J Mol Sci. 2018 Jul 15;19(7):2058. doi: 10.3390/ijms19072058 (PMC6073141; doi:10.3390/ijms19072058)
Supplement: Supplementary file 1 [file ijms-19-02058-s001.zip › supplementary files/Table S6.xlsx]

## Sheet: Table S6
Table S6. The mature miRNA sequences for all high quality probes in microarray assay
Index	Reporter Name	Target Sequence (5' to 3')	Reporter Source
1	rno-miR-7a-1-3p	ACAACAAAUCACAGUCUGCCAU	standard
2	rno-miR-22-3p	AAGCUGCCAGUUGAAGAACUGU	standard
3	rno-miR-28-5p	AAGGAGCUCACAGUCUAUUGAG	standard
4	rno-miR-34a-3p	AAUCAGCAAGUAUACUGCCCUA	standard
5	rno-miR-34b-3p	AAUCACUAACUCCACUGCCAUC	standard
6	rno-miR-34c-3p	AAUCACUAACCACACAGCCAGG	standard
7	rno-miR-99a-5p	AACCCGUAGAUCCGAUCUUGUG	standard
8	rno-miR-100-5p	AACCCGUAGAUCCGAACUUGUG	standard
9	rno-miR-122-3p	AACGCCAUCAUCACACUAA	standard
10	rno-miR-125b-2-3p	ACAAGUCAGGCUCUUGGGACCU	standard
11	rno-miR-129-1-3p	AAGCCCUUACCCCAAAAAG	standard
12	rno-miR-129-2-3p	AAGCCCUUACCCCAAAAAGCAU	standard
13	rno-miR-154-3p	AAUCAUACACGGUUGACCUAUU	standard
14	rno-miR-181a-5p	AACAUUCAACGCUGUCGGUGAGU	standard
15	rno-miR-181b-5p	AACAUUCAUUGCUGUCGGUGGGU	standard
16	rno-miR-181c-5p	AACAUUCAACCUGUCGGUGAGU	standard
17	rno-miR-181d-5p	AACAUUCAUUGUUGUCGGUGGGU	standard
18	rno-miR-190b-3p	AACUAAAUGUCAAACAUUCU	standard
19	rno-miR-193-3p	AACUGGCCUACAAAGUCCCAGU	standard
20	rno-miR-196c-3p	ACAACAACACCAAACCACCUGA	standard
21	rno-miR-208b-5p	AAGCUUUUUGCUCGCGUUAU	standard
22	rno-miR-216b-5p	AAAUCUCUGCAGGCAAAUGUGA	standard
23	rno-miR-218a-1-3p	AAACAUGGUUCCGUCAAGCAC	standard
24	rno-miR-224-3p	AAAUGGUGCCCUAGUGACUACA	standard
25	rno-miR-291a-3p	AAAGUGCUUCCACUUUGUGUGCC	standard
26	rno-miR-291b	AAAGUGCAUCCAUUUUGUUAGU	standard
27	rno-miR-292-3p	AAGUGCCGCCAGGUUUUGAGUGU	standard
28	rno-miR-295-3p	AAGUGCUACUACUUUUGGGUGU	standard
29	rno-miR-320-3p	AAAAGCUGGGUUGAGAGGGCGA	standard
30	rno-miR-322-3p	AAACAUGAAGCGCUGCAACA	standard
31	rno-miR-329-3p	AACACACCCAGCUAACCUUUUU	standard
32	rno-miR-338-5p	AACAAUAUCCUGGUGCUGAGUG	standard
33	rno-miR-362-3p	AACACACCUGUUCAAGGAUUCA	standard
34	rno-miR-362-5p	AAUCCUUGGAACCUAGGUGUGAAU	standard
35	rno-miR-363-3p	AAUUGCACGGUAUCCAUCUGU	standard
36	rno-miR-369-3p	AAUAAUACAUGGUUGAUCUUU	standard
37	rno-miR-376c-3p	AACAUAGAGGAAAUUUCACGU	standard
38	rno-miR-382-3p	AAUCAUUCACGGACAACACUU	standard
39	rno-miR-409a-3p	AAUGUUGCUCGGUGAACCCC	standard
40	rno-miR-410-3p	AAUAUAACACAGAUGGCCUGU	standard
41	rno-miR-425-5p	AAUGACACGAUCACUCCCGUUGA	standard
42	rno-miR-448-5p	AACAUCCUGCAUAGUGCUGCCA	standard
43	rno-miR-451-5p	AAACCGUUACCAUUACUGAGUU	standard
44	rno-miR-483-5p	AAGACGGGAGAAGAGAAGGGAG	standard
45	rno-miR-487b-3p	AAUCGUACAGGGUCAUCCACUU	standard
46	rno-miR-495	AAACAAACAUGGUGCACUUCUU	standard
47	rno-miR-499-3p	AACAUCACAGCAAGUCUGUGCU	standard
48	rno-miR-500-3p	AAUGCACCUGGGCAAGGGUUCA	standard
49	rno-miR-500-5p	AAUCCUUGCUAUCUGGGUGCUUAG	standard
50	rno-miR-501-3p	AAUGCACCCGGGCAAGGAUUUGG	standard
51	rno-miR-501-5p	AAUCCUUUGUCCCUGGGUGA	standard
52	rno-miR-511-3p	AAUGUGUAGCAAAAGACAGGA	standard
53	rno-miR-541-5p	AAGGGAUUCUGAUGUUGGUCACACU	standard
54	rno-miR-543-3p	AAACAUUCGCGGUGCACUUCU	standard
55	rno-miR-543-5p	AAGUUGCCCGCGUGUUUUUCG	standard
56	rno-miR-582-3p	AACCUGUUGAACAACUGAACCC	standard
57	rno-miR-652-3p	AAUGGCGCCACUAGGGUUGUG	standard
58	rno-miR-652-5p	ACAACCCUAGGAGGGGGUGCCAU	standard
59	rno-miR-672-3p	ACACACAGUCGCCAUCUUCGA	standard
60	rno-miR-708-5p	AAGGAGCUUACAAUCUAGCUGGG	standard
61	rno-miR-741-3p	AAAGAUGCCACGCUAUGUAGAU	standard
62	rno-miR-872-5p	AAGGUUACUUGUUAGUUCAGG	standard
63	rno-miR-1839-5p	AAGGUAGAUAGAACAGGUCUUG	standard
64	rno-miR-3542	AAGGCUCUUCUUUCCUUGCAG	standard
65	rno-miR-3544	AACUCCUGCAUGACGCCGUUCCC	standard
66	rno-miR-3557-3p	ACACAGGACCUGGAGUCAGGAG	standard
67	rno-miR-3576	ACACACCAAGGAUAAUUUCUCC	standard
68	rno-miR-3587	AACACUGAUUUCAAAUGGUGC	standard
69	rno-miR-3591	AACACCAUUGUCACACUCCA	standard
70	rno-miR-3592	AAGUGUUGUCCGUGAAUGAUU	standard
71	rno-miR-3596a	AACUAUACAACCUACUACCUCA	standard
72	rno-miR-3596b	AACUAUGCAACCUACUACCU	standard
73	rno-miR-6325	AAAGUCAGACAGAGACUCUGCAG	standard
74	rno-miR-6329	AAUGUGACUCAGCUAUCUGAACA	standard
75	Q1	AGGGGUGGUGUUGGGACAGCUCCGU	custom
76	Q10	CUUGGAUUUUCCUGGGCCUCAG	custom
77	Q100	GUAAGUGAGGGCAAGCCUUCUGG	custom
78	Q11	UCACUACCUGACAAUACAGU	custom
79	Q12	AUGGUACCCUGGCAUACUGAGU	custom
80	Q13	UUCUCCCACUACCAGGCUCCCA	custom
81	Q14	UUAGCGGUGGACCGCCCUGCG	custom
82	Q15	UCAGGCCAGGCACAGUGGCUCA	custom
83	Q16	ACCAAGUCUGCGUCAUCCUCUC	custom
84	Q17	GCCUCUCUCGGAGUCGCUCGGA	custom
85	Q18	UCUGCAGGGUUUGCUUUGAG	custom
86	Q19	CCCUCUCUGGCUCCUCCCCAAA	custom
87	Q2	AGUUGCCAGGGCUGCCUUUGGU	custom
88	Q20	GUGGAAAGCAUGCAUCCAGGGUGU	custom
89	Q21	UACAGAUGCAGAUUCUCUGACUUC	custom
90	Q22	CUCUCUGGCCGUCUACCUUCCA	custom
91	Q23	GUGACUGAUACCUUGGAGGCAU	custom
92	Q24	UGCUCAGGUUGCACAGCUGGGA	custom
93	Q25	AUUAGGUAGUGGCAGUGGAAC	custom
94	Q26	UCUGUAGCCUGGGAGCAAUGGGGU	custom
95	Q27	UCUCUGGAGGGAAGCACUUUCUG	custom
96	Q28	AGGCCUCUGUGACGUCACGGUGU	custom
97	Q29	CAUCAGAAUUCAUGGAGGCUAG	custom
98	Q3	UGGGGGAGUGCAGUGAUUGUGG	custom
99	Q30	CUGGGCCCGCGGCGGGCGUGGGG	custom
100	Q31	UAGGGGCAGCAGAGGACCUGGG	custom
101	Q32	UGCAGGGGUCGGGUGGGCCAGG	custom
102	Q33	UGCAGCUCUGGUGGAAAAUGGAG	custom
103	Q34	CCCCACCUCCUCUCUCCUCAG	custom
104	Q35	UUCUGGAAUUCUGUGUGAGGGA	custom
105	Q36	CCUGUGCUCCCAGGGCCUCGC	custom
106	Q37	UGAGACCAGGACUGGAUGCACC	custom
107	Q38	UAGGAUUACAAGUGUCGGCCAC	custom
108	Q39	CAGCCUCGCUGGCAGGCAGCU	custom
109	Q4	CGGGGUGGGUGAGGUCGGGC	custom
110	Q40	UGGAGACUUUCAGUGGAGUGA	custom
111	Q41	CUCCCCACCCCUGUACCAGUGA	custom
112	Q42	AUCCUUGGCCUUCCUAGGUGU	custom
113	Q43	CCACUGAGCCACUUUCCAGCCCUU	custom
114	Q44	AGGUUGCCUCAUAGUGAGCUUGCA	custom
115	Q45	AGAAAGGCAUCAUAUAGGAGCUG	custom
116	Q46	UACUGAGAAUGGGUAGCAGUCA	custom
117	Q47	GACCUCUGGAUGUUAGGGACUGA	custom
118	Q48	CAGGCAGUGACUGUUCAGACGUC	custom
119	Q49	GUUUGCACGGGUGGGCCUUGUCU	custom
120	Q5	UGAGUGCCGGUGCCUGCCCUG	custom
121	Q50	ACCUGUCUGUGGAAAGGAGCUA	custom
122	Q51	AGGGAAGGAGGCUUGGUCUUAG	custom
123	Q52	UGCCUGGGUCUCUGGCCUGCGCGU	custom
124	Q53	GCAGGACAGGCAGAAGUGGAU	custom
125	Q54	UCCUGUCUUUCCUUGUUGGAGC	custom
126	Q55	UGGAAGGGAGAAGAGCUUUAAU	custom
127	Q56	UGGCAGGGAGGCUGGGAGGGG	custom
128	Q57	CCCUUGGGUCUGAUGGGGUAG	custom
129	Q58	GGCUGGAGCGAGUGCAGUGGUG	custom
130	Q59	CAGGGCAGGAAGAAGUGGACAA	custom
131	Q6	UGGGGGAGCCAUGAGAUAAGAGCA	custom
132	Q60	GGCUUUCUAGUCUCAGCUCUCC	custom
133	Q61	CAGCAGUGCGCAGGGCUG	custom
134	Q62	GAGGGCAGCGUGGGUGUGGCGGA	custom
135	Q63	UGGGCAGGGGCUUAUUGUAGGAG	custom
136	Q64	UCUUCUCUGUUUUGGCCAUGUG	custom
137	Q65	GCGGAAGGCGGAGCGGCGGA	custom
138	Q66	CCUGUCUGUGCCUGCUGUACA	custom
139	Q67	GGCUUGCAUGGGGGACUGG	custom
140	Q68	AGGAUAGGAAGAAUGAAGUGCU	custom
141	Q69	GUUGGGGUGCAGGGGUCUGCU	custom
142	Q7	CACAGGGGAAGCUCAGUGCCAGCC	custom
143	Q70	UGAGGUGGUAGGAUGUAGA	custom
144	Q71	AUCGCUGCGGUUGCGAGCGCUGU	custom
145	Q72	CCUCAGGGCUGUAGAACAGGGCU	custom
146	Q73	UUCACAGGGAGGUGUCAU	custom
147	Q74	AGGAGGCAGCGCUCUCAGGAC	custom
148	Q75	CAGGGCCUCACUGUAUCGCCCA	custom
149	Q76	UGUCAGUGACUCCUGCCCCUUGGU	custom
150	Q77	UGGCAAACGUGGAAGCCGAGA	custom
151	Q78	AGGCAGGGGCUGGUGCUGGGCGGG	custom
152	Q79	CAAUUCUCAAAGGAGCCUCCC	custom
153	Q8	AUUGUCCUUGCUGUUUGGAGAU	custom
154	Q80	ACAGUAGAGGGAGGAAUCGCAG	custom
155	Q81	GGGGCCUGGCGGUGGGCGG	custom
156	Q82	CCAGUGACUGAGCUGGAGCCA	custom
157	Q83	GGAGUGGGCUGGUGGUU	custom
158	Q84	CUCGGCGCGGGGCGCGGGCUCC	custom
159	Q85	CUUGGGGCAUGGAGUCCCA	custom
160	Q86	AGCUUCCAUGACUCCUGAUGGA	custom
161	Q87	UGAAGCCAGCUCUGGUCUGGGC	custom
162	Q88	GACUGGACAAGCUGAGGAA	custom
163	Q89	UCUCAGGAGUAAAGACAGAGUU	custom
164	Q9	ACACAUGGGUGGCUGUGGCCU	custom
165	Q90	AGCAGAGGCAGAGAGGCUCAGG	custom
166	Q91	UGUUGGGAUUCAGCAGGACCAU	custom
167	Q92	ACAGGAGUGGGGGUGGGACAU	custom
168	Q93	CCACCAGGUCUAGCAUUGGGAU	custom
169	Q94	GGCCACUGAGUCAGCACCA	custom
170	Q95	GGGAGUCUACAGCAGGG	custom
171	Q96	CGGGCCUGACCAGUCUCAAGAC	custom
172	Q97	GGAGGCAGAGGCAGGAGGA	custom
173	Q98	AGCUGGAGCACAAAAGCCGGUG	custom
174	Q99	AGGCAGAGGCUGGCGGAUCUCU	custom
175	rno-let-7a-1-3p	CUAUACAAUCUACUGUCUUUCC	standard
176	rno-let-7a-2-3p	CUGUACAGCCUCCUAGCUUUCC	standard
177	rno-let-7a-5p	UGAGGUAGUAGGUUGUAUAGUU	standard
178	rno-let-7b-3p	CUAUACAACCUACUGCCUUCCC	standard
179	rno-let-7b-5p	UGAGGUAGUAGGUUGUGUGGUU	standard
180	rno-let-7c-1-3p	CUGUACAACCUUCUAGCUUUCC	standard
181	rno-let-7c-5p	UGAGGUAGUAGGUUGUAUGGUU	standard
182	rno-let-7d-3p	CUAUACGACCUGCUGCCUUUCU	standard
183	rno-let-7d-5p	AGAGGUAGUAGGUUGCAUAGUU	standard
184	rno-let-7e-3p	CUAUACGGCCUCCUAGCUUUCC	standard
185	rno-let-7e-5p	UGAGGUAGGAGGUUGUAUAGUU	standard
186	rno-let-7f-1-3p	CUAUACAAUCUAUUGCCUUCC	standard
187	rno-let-7f-2-3p	CUAUACAGUCUACUGUCUUUC	standard
188	rno-let-7f-5p	UGAGGUAGUAGAUUGUAUAGUU	standard
189	rno-let-7i-3p	CUGCGCAAGCUACUGCCUUGCU	standard
190	rno-let-7i-5p	UGAGGUAGUAGUUUGUGCUGUU	standard
191	rno-miR-1-3p	UGGAAUGUAAAGAAGUGUGUAU	standard
192	rno-miR-1-5p	GCACAUACUUCUUUAUGUACCC	standard
193	rno-miR-7a-2-3p	CAACAAGUCCCAGUCUGCCACA	standard
194	rno-miR-7a-5p	UGGAAGACUAGUGAUUUUGUUGU	standard
195	rno-miR-7b	UGGAAGACUUGUGAUUUUGUUGU	standard
196	rno-miR-9a-3p	AUAAAGCUAGAUAACCGAAAGU	standard
197	rno-miR-9a-5p	UCUUUGGUUAUCUAGCUGUAUGA	standard
198	rno-miR-9b-3p	AUACAGCUAGAUAACCAA	standard
199	rno-miR-9b-5p	UUCGGUUAUCUAGCUUUAU	standard
200	rno-miR-10a-3p	CAAAUUCGUAUCUAGGGGAAUA	standard
201	rno-miR-10a-5p	UACCCUGUAGAUCCGAAUUUGUG	standard
202	rno-miR-10b-3p	ACAGAUUCGAUUCUAGGGGAA	standard
203	rno-miR-10b-5p	CCCUGUAGAACCGAAUUUGUGU	standard
204	rno-miR-15b-3p	CGAAUCAUUAUUUGCUGCUCUA	standard
205	rno-miR-15b-5p	UAGCAGCACAUCAUGGUUUACA	standard
206	rno-miR-16-3p	ACCAAUAUUAUUGUGCUGCUU	standard
207	rno-miR-16-5p	UAGCAGCACGUAAAUAUUGGCG	standard
208	rno-miR-17-1-3p	ACUGCAGUGAAGGCACUUGUGG	standard
209	rno-miR-17-2-3p	ACUGCACUGCAAGCACUUCUUAC	standard
210	rno-miR-17-5p	CAAAGUGCUUACAGUGCAGGUAG	standard
211	rno-miR-18a-3p	ACUGCCCUAAGUGCUCCUUCU	standard
212	rno-miR-18a-5p	UAAGGUGCAUCUAGUGCAGAUAG	standard
213	rno-miR-19a-3p	UGUGCAAAUCUAUGCAAAACUGA	standard
214	rno-miR-19a-5p	UCGUUUUGCAUAGUUGCACU	standard
215	rno-miR-19b-1-5p	AGUUUUGCAGGUUUGCAUCCAG	standard
216	rno-miR-19b-2-5p	AGUUUUGCAGAUUUGCAGUUCAG	standard
217	rno-miR-19b-3p	UGUGCAAAUCCAUGCAAAACUGA	standard
218	rno-miR-20a-3p	ACUGCAUUACGAGCACUUACA	standard
219	rno-miR-20a-5p	UAAAGUGCUUAUAGUGCAGGUAG	standard
220	rno-miR-20b-3p	ACUGCAGUGUGAGCACUUCUGG	standard
221	rno-miR-20b-5p	CAAAGUGCUCAUAGUGCAGGUAG	standard
222	rno-miR-21-3p	CAACAGCAGUCGAUGGGCUGUC	standard
223	rno-miR-21-5p	UAGCUUAUCAGACUGAUGUUGA	standard
224	rno-miR-22-5p	AGUUCUUCAGUGGCAAGCUUUA	standard
225	rno-miR-23a-3p	AUCACAUUGCCAGGGAUUUCC	standard
226	rno-miR-23a-5p	GGGGUUCCUGGGGAUGGGAUUU	standard
227	rno-miR-23b-3p	AUCACAUUGCCAGGGAUUACC	standard
228	rno-miR-23b-5p	GGGUUCCUGGCAUGCUGAUUU	standard
229	rno-miR-24-1-5p	GUGCCUACUGAGCUGAUAUCAG	standard
230	rno-miR-24-2-5p	GUGCCUACUGAGCUGAAACAGU	standard
231	rno-miR-24-3p	UGGCUCAGUUCAGCAGGAACAG	standard
232	rno-miR-25-3p	CAUUGCACUUGUCUCGGUCUGA	standard
233	rno-miR-25-5p	AGGCGGAGACACGGGCAAUUGC	standard
234	rno-miR-26a-3p	CCUAUUCUUGGUUACUUGCAC	standard
235	rno-miR-26a-5p	UUCAAGUAAUCCAGGAUAGGCU	standard
236	rno-miR-26b-3p	CCUGUUCUCCAUUACUUGGCUC	standard
237	rno-miR-26b-5p	UUCAAGUAAUUCAGGAUAGGU	standard
238	rno-miR-27a-3p	UUCACAGUGGCUAAGUUCCGC	standard
239	rno-miR-27a-5p	AGGGCUUAGCUGCUUGUGAGCA	standard
240	rno-miR-27b-3p	UUCACAGUGGCUAAGUUCUGC	standard
241	rno-miR-27b-5p	AGAGCUUAGCUGAUUGGUGAACAG	standard
242	rno-miR-28-3p	CACUAGAUUGUGAGCUCCUGGA	standard
243	rno-miR-29a-3p	UAGCACCAUCUGAAAUCGGUUA	standard
244	rno-miR-29a-5p	ACUGAUUUCUUUUGGUGUUCAG	standard
245	rno-miR-29b-1-5p	UUUCAUAUGGUGGUUUAGAUUU	standard
246	rno-miR-29b-2-5p	CUGGUUUCACAUGGUGGCUUAG	standard
247	rno-miR-29b-3p	UAGCACCAUUUGAAAUCAGUGUU	standard
248	rno-miR-29c-3p	UAGCACCAUUUGAAAUCGGUUA	standard
249	rno-miR-29c-5p	UGACCGAUUUCUCCUGGUGUUC	standard
250	rno-miR-30a-3p	CUUUCAGUCGGAUGUUUGCAGC	standard
251	rno-miR-30a-5p	UGUAAACAUCCUCGACUGGAAG	standard
252	rno-miR-30b-3p	CUGGGAUGUGGAUGUUUACGUC	standard
253	rno-miR-30b-5p	UGUAAACAUCCUACACUCAGCU	standard
254	rno-miR-30c-1-3p	CUGGGAGAGGGUUGUUUACUCC	standard
255	rno-miR-30c-2-3p	CUGGGAGAAGGCUGUUUACUCU	standard
256	rno-miR-30c-5p	UGUAAACAUCCUACACUCUCAGC	standard
257	rno-miR-30d-3p	CUUUCAGUCAGAUGUUUGCUGC	standard
258	rno-miR-30d-5p	UGUAAACAUCCCCGACUGGAAG	standard
259	rno-miR-30e-3p	CUUUCAGUCGGAUGUUUACAGC	standard
260	rno-miR-30e-5p	UGUAAACAUCCUUGACUGGAAG	standard
261	rno-miR-31a-3p	UGCUAUGCCAACAUAUUGCCAUC	standard
262	rno-miR-31a-5p	AGGCAAGAUGCUGGCAUAGCUG	standard
263	rno-miR-31b	CUAUGCCAGCAUCUUGCCU	standard
264	rno-miR-32-3p	GCAAUUUAGUGUGUGUGAUAUU	standard
265	rno-miR-32-5p	UAUUGCACAUUACUAAGUUGCA	standard
266	rno-miR-33-3p	CAAUGUUUCCACAGUGCAUCA	standard
267	rno-miR-33-5p	GUGCAUUGUAGUUGCAUUGCA	standard
268	rno-miR-34a-5p	UGGCAGUGUCUUAGCUGGUUGU	standard
269	rno-miR-34b-5p	AGGCAGUGUAAUUAGCUGAUUGU	standard
270	rno-miR-34c-5p	AGGCAGUGUAGUUAGCUGAUUGC	standard
271	rno-miR-92a-1-5p	AGGUUGGGAUUUGUCGCAAUGCU	standard
272	rno-miR-92a-2-5p	AGGUGGGGAUUAGUGCCAUUAC	standard
273	rno-miR-92a-3p	UAUUGCACUUGUCCCGGCCUG	standard
274	rno-miR-92b-3p	UAUUGCACUCGUCCCGGCCUCC	standard
275	rno-miR-92b-5p	AGGGACGGGACGCGGUGCAGUGUU	standard
276	rno-miR-93-3p	ACUGCUGAGCUAGCACUUCCCGA	standard
277	rno-miR-93-5p	CAAAGUGCUGUUCGUGCAGGUAG	standard
278	rno-miR-96-3p	CAAUCAUGUGCAGUGCCAAUAU	standard
279	rno-miR-96-5p	UUUGGCACUAGCACAUUUUUGCU	standard
280	rno-miR-98-3p	CUAUACAACUUACUACUUUCC	standard
281	rno-miR-98-5p	UGAGGUAGUAAGUUGUAUUGUU	standard
282	rno-miR-99a-3p	CAAGCUCGUUUCUAUGGGUCUG	standard
283	rno-miR-99b-3p	CAAGCUCGUGUCUGUGGGUCCG	standard
284	rno-miR-99b-5p	CACCCGUAGAACCGACCUUGCG	standard
285	rno-miR-100-3p	CAAGCUUGUGUCUAUAGGU	standard
286	rno-miR-101a-3p	UACAGUACUGUGAUAACUGAA	standard
287	rno-miR-101a-5p	UCAGUUAUCACAGUGCUGAUGC	standard
288	rno-miR-101b-3p	UACAGUACUGUGAUAGCUGAA	standard
289	rno-miR-101b-5p	UCGGUUAUCAUGGUACCGAUGC	standard
290	rno-miR-103-1-5p	GGCUUCUUUACAGUGCUGCCUUGU	standard
291	rno-miR-103-2-5p	AGCUUCUUUACAGUGCU	standard
292	rno-miR-103-3p	AGCAGCAUUGUACAGGGCUAUGA	standard
293	rno-miR-105	CAAGUGCUCAGAUGUCUGUGGU	standard
294	rno-miR-106b-3p	CCGCACUGUGGGUACUUGCUGC	standard
295	rno-miR-106b-5p	UAAAGUGCUGACAGUGCAGAU	standard
296	rno-miR-107-3p	AGCAGCAUUGUACAGGGCUAUCA	standard
297	rno-miR-107-5p	AGCUUCUUUACAGUGUUGCCUUGU	standard
298	rno-miR-122-5p	UGGAGUGUGACAAUGGUGUUUG	standard
299	rno-miR-124-3p	UAAGGCACGCGGUGAAUGCC	standard
300	rno-miR-124-5p	CGUGUUCACAGCGGACCUUGAU	standard
301	rno-miR-125a-3p	ACAGGUGAGGUUCUUGGGAGCC	standard
302	rno-miR-125a-5p	UCCCUGAGACCCUUUAACCUGUGA	standard
303	rno-miR-125b-1-3p	ACGGGUUAGGCUCUUGGGAGCU	standard
304	rno-miR-125b-5p	UCCCUGAGACCCUAACUUGUGA	standard
305	rno-miR-126a-3p	UCGUACCGUGAGUAAUAAUGCG	standard
306	rno-miR-126a-5p	CAUUAUUACUUUUGGUACGCG	standard
307	rno-miR-126b	UACCAAAAGUAAUAAUGUGCUG	standard
308	rno-miR-127-3p	UCGGAUCCGUCUGAGCUUGGCU	standard
309	rno-miR-127-5p	CUGAAGCUCAGAGGGCUCUGAUU	standard
310	rno-miR-128-1-5p	CGGGGCCGUAGCACUGUCUGA	standard
311	rno-miR-128-2-5p	GGGGGCCGAUGCACUGUAAGA	standard
312	rno-miR-128-3p	UCACAGUGAACCGGUCUCUUU	standard
313	rno-miR-129-5p	CUUUUUGCGGUCUGGGCUUGC	standard
314	rno-miR-130a-3p	CAGUGCAAUGUUAAAAGGGCAU	standard
315	rno-miR-130a-5p	GCUCUUUUCACAUUGUGCUACU	standard
316	rno-miR-130b-3p	CAGUGCAAUGAUGAAAGGGCAU	standard
317	rno-miR-130b-5p	ACUCUUUCCCUGUUGCACUACU	standard
318	rno-miR-132-3p	UAACAGUCUACAGCCAUGGUCG	standard
319	rno-miR-132-5p	ACCGUGGCUUUCGAUUGUUACU	standard
320	rno-miR-133a-3p	UUUGGUCCCCUUCAACCAGCUG	standard
321	rno-miR-133a-5p	AGCUGGUAAAAUGGAACCAAAU	standard
322	rno-miR-133b-3p	UUUGGUCCCCUUCAACCAGCUA	standard
323	rno-miR-133b-5p	GCUGGUCAAACGGAACCAAGU	standard
324	rno-miR-133c	CAGCUGGUUGAAGGGGACCAA	standard
325	rno-miR-134-3p	CUGUGGGCCACCUAGUCACCAA	standard
326	rno-miR-134-5p	UGUGACUGGUUGACCAGAGGGG	standard
327	rno-miR-135a-3p	UGUAGGGAUGGAAGCCAUGAAA	standard
328	rno-miR-135a-5p	UAUGGCUUUUUAUUCCUAUGUGA	standard
329	rno-miR-135b-3p	AUGUAGGGCUAAAAGCCAUGGG	standard
330	rno-miR-135b-5p	UAUGGCUUUUCAUUCCUAUGUGA	standard
331	rno-miR-136-3p	CAUCAUCGUCUCAAAUGAGUCU	standard
332	rno-miR-136-5p	ACUCCAUUUGUUUUGAUGAUGGA	standard
333	rno-miR-137-3p	UUAUUGCUUAAGAAUACGCGUAG	standard
334	rno-miR-137-5p	ACGGGUAUUCUUGGGUGGAUAA	standard
335	rno-miR-138-1-3p	CGGCUACUUCACAACACCAGGG	standard
336	rno-miR-138-2-3p	GCUAUUUCACGACACCAGGGU	standard
337	rno-miR-138-5p	AGCUGGUGUUGUGAAUCAGGCCG	standard
338	rno-miR-139-3p	UGGAGACGCGGCCCUGUUGGAG	standard
339	rno-miR-139-5p	UCUACAGUGCACGUGUCUCCAG	standard
340	rno-miR-140-3p	UACCACAGGGUAGAACCACGG	standard
341	rno-miR-140-5p	CAGUGGUUUUACCCUAUGGUAG	standard
342	rno-miR-141-3p	UAACACUGUCUGGUAAAGAUGG	standard
343	rno-miR-141-5p	UCCAUCUUCCAGUGCAGUGUUG	standard
344	rno-miR-142-3p	UGUAGUGUUUCCUACUUUAUGGA	standard
345	rno-miR-142-5p	CAUAAAGUAGAAAGCACUACU	standard
346	rno-miR-143-3p	UGAGAUGAAGCACUGUAGCUCA	standard
347	rno-miR-143-5p	GGUGCAGUGCUGCAUCUCUGG	standard
348	rno-miR-144-3p	UACAGUAUAGAUGAUGUACU	standard
349	rno-miR-144-5p	GGAUAUCAUCAUAUACUGUAAGU	standard
350	rno-miR-145-3p	GGAUUCCUGGAAAUACUGUUC	standard
351	rno-miR-145-5p	GUCCAGUUUUCCCAGGAAUCCCU	standard
352	rno-miR-146a-3p	ACCUGUGAAGUUCAGUUCUUU	standard
353	rno-miR-146a-5p	UGAGAACUGAAUUCCAUGGGUU	standard
354	rno-miR-146b-3p	CCUAGGGACUCAGUUCUGGUG	standard
355	rno-miR-146b-5p	UGAGAACUGAAUUCCAUAGGCUGU	standard
356	rno-miR-147	GUGUGCGGAAAUGCUUCUGCUA	standard
357	rno-miR-148b-3p	UCAGUGCAUCACAGAACUUUGU	standard
358	rno-miR-148b-5p	GAAGUUCUGUUAUACACUCAGG	standard
359	rno-miR-150-3p	CUGGUACAGGCCUGGGGGA	standard
360	rno-miR-150-5p	UCUCCCAACCCUUGUACCAGUG	standard
361	rno-miR-151-3p	CUAGACUGAGGCUCCUUGAGG	standard
362	rno-miR-151-5p	UCGAGGAGCUCACAGUCUAGU	standard
363	rno-miR-152-3p	UCAGUGCAUGACAGAACUUGG	standard
364	rno-miR-152-5p	AGGUUCUGUGAUACACUCCGACU	standard
365	rno-miR-153-3p	UUGCAUAGUCACAAAAGUGAUC	standard
366	rno-miR-153-5p	GUCAUUUUUGUGAUGUUGCAGCU	standard
367	rno-miR-154-5p	UAGGUUAUCCGUGUUGCCUUCG	standard
368	rno-miR-155-3p	CUCCUACCUGUUAGCAUUAAC	standard
369	rno-miR-155-5p	UUAAUGCUAAUUGUGAUAGGGGU	standard
370	rno-miR-181a-1-3p	ACCAUCGACCGUUGAUUGUACC	standard
371	rno-miR-181a-2-3p	ACCACCAACCGUUGACUGU	standard
372	rno-miR-181b-1-3p	CUCACUGAACAAUGAAUGCAA	standard
373	rno-miR-181b-2-3p	CUCACUGGUCAAUGAAUGCAAA	standard
374	rno-miR-181c-3p	ACCAUCGACCGUUGAGUGGACC	standard
375	rno-miR-181d-3p	CCACCGGGGGAUGAAUGUCA	standard
376	rno-miR-182	UUUGGCAAUGGUAGAACUCACACCG	standard
377	rno-miR-183-3p	UGAAUUACCGAAGGGCCAUAA	standard
378	rno-miR-183-5p	UAUGGCACUGGUAGAAUUCACU	standard
379	rno-miR-184	UGGACGGAGAACUGAUAAGGGU	standard
380	rno-miR-185-3p	UUUCCUCUGGUCCUUCUCU	standard
381	rno-miR-185-5p	UGGAGAGAAAGGCAGUUCCUGA	standard
382	rno-miR-186-3p	GCCCAAAGGUGAAUUUUUUGG	standard
383	rno-miR-186-5p	CAAAGAAUUCUCCUUUUGGGCU	standard
384	rno-miR-187-3p	UCGUGUCUUGUGUUGCAGCCGG	standard
385	rno-miR-187-5p	AGGCUACAACACAGGACC	standard
386	rno-miR-188-3p	CUCCCACAUGCAGGGUUUGC	standard
387	rno-miR-188-5p	CAUCCCUUGCAUGGUGGAGGG	standard
388	rno-miR-190a-3p	ACUAUAUAUCAAGCAUAUUCCU	standard
389	rno-miR-190a-5p	UGAUAUGUUUGAUAUAUUAGGU	standard
390	rno-miR-190b-5p	UGAUAUGUUUGAUAUUAGGUU	standard
391	rno-miR-191a-3p	GCUGCACUUGGAUUUCGUUCCC	standard
392	rno-miR-191a-5p	CAACGGAAUCCCAAAAGCAGCUG	standard
393	rno-miR-191b	GAACGAAAUCCAAGUGCAGCU	standard
394	rno-miR-192-3p	CUGCCAGUUCCAUAGGUCACAG	standard
395	rno-miR-192-5p	CUGACCUAUGAAUUGACAGCC	standard
396	rno-miR-193-5p	UGGGUCUUUGCGGGCAAGAUGA	standard
397	rno-miR-194-3p	CCAGUGGGGCUGCUGUUAUCU	standard
398	rno-miR-194-5p	UGUAACAGCAACUCCAUGUGGA	standard
399	rno-miR-195-3p	CCAAUAUUGGCUGUGCUGCUCCA	standard
400	rno-miR-195-5p	UAGCAGCACAGAAAUAUUGGC	standard
401	rno-miR-196a-3p	UCGGCAACAAGAAACUGCCUGA	standard
402	rno-miR-196a-5p	UAGGUAGUUUCAUGUUGUUGGG	standard
403	rno-miR-196b-3p	UCGACAGCACGACACUGCCUUCA	standard
404	rno-miR-196b-5p	UAGGUAGUUUCCUGUUGUUGGG	standard
405	rno-miR-196c-5p	UAGGUAGUUUCGUGUUGUUGGG	standard
406	rno-miR-199a-3p	ACAGUAGUCUGCACAUUGGUUA	standard
407	rno-miR-199a-5p	CCCAGUGUUCAGACUACCUGUUC	standard
408	rno-miR-200a-3p	UAACACUGUCUGGUAACGAUGU	standard
409	rno-miR-200a-5p	CAUCUUACCGGACAGUGCUGG	standard
410	rno-miR-200b-3p	UAAUACUGCCUGGUAAUGAUGAC	standard
411	rno-miR-200b-5p	CAUCUUACUGGGCAGCAUUGGA	standard
412	rno-miR-200c-3p	UAAUACUGCCGGGUAAUGAUG	standard
413	rno-miR-200c-5p	CGUCUUACCCAGCAGUGUUUG	standard
414	rno-miR-201-3p	UGAACAGCGCCUUUCUGUGUAG	standard
415	rno-miR-201-5p	CACUCAGUAAGGCAUUGUUC	standard
416	rno-miR-202-3p	AGAGGUAUAGCGCAUGGGAAA	standard
417	rno-miR-202-5p	UUCCUAUGCAUAUACUUCU	standard
418	rno-miR-203a-3p	GUGAAAUGUUUAGGACCACUAG	standard
419	rno-miR-203a-5p	AGUGGUUCUUAACAGUUCAAC	standard
420	rno-miR-203b-3p	UUGAACUGUUAAGAACCACUGG	standard
421	rno-miR-203b-5p	AGUGGUCCUAAACAUUUCAC	standard
422	rno-miR-204-3p	GCUGGGAAGGCAAAGGGACGUU	standard
423	rno-miR-204-5p	UUCCCUUUGUCAUCCUAUGCCU	standard
424	rno-miR-205	UCCUUCAUUCCACCGGAGUCUGU	standard
425	rno-miR-206-3p	UGGAAUGUAAGGAAGUGUGUGG	standard
426	rno-miR-206-5p	ACAUGCUUCUUUAUAUCCUCAU	standard
427	rno-miR-207	CUUCUCCUGGCUCUCCUCCCUUU	standard
428	rno-miR-208a-3p	AUAAGACGAGCAAAAAGC	standard
429	rno-miR-208a-5p	GAGCUUUUGGCCCGGGUUAUAC	standard
430	rno-miR-208b-3p	AUAAGACGAACAAAAGGU	standard
431	rno-miR-210-3p	CUGUGCGUGUGACAGCGGCUGA	standard
432	rno-miR-210-5p	AGCCACUGCCCACAGCACACUG	standard
433	rno-miR-211-3p	GGCAAGGACAGCAAAGGGGG	standard
434	rno-miR-211-5p	UUCCCUUUGUCAUCCUUUGCCU	standard
435	rno-miR-212-3p	UAACAGUCUCCAGUCACGGCCA	standard
436	rno-miR-212-5p	ACCUUGGCUCUAGACUGCUUACUG	standard
437	rno-miR-214-3p	ACAGCAGGCACAGACAGGCAG	standard
438	rno-miR-214-5p	AGAGUUGUCAUGUGUCU	standard
439	rno-miR-215	AUGACCUAUGAUUUGACAGACA	standard
440	rno-miR-216a-3p	CACAGUGGUCUCUGGGAUUAUG	standard
441	rno-miR-216a-5p	UAAUCUCAGCUGGCAACUGUGA	standard
442	rno-miR-216b-3p	CACACUUACUUGUAGAGAUU	standard
443	rno-miR-217-3p	AUCAGUUCCUAAUGCAUUGCCU	standard
444	rno-miR-217-5p	UACUGCAUCAGGAACUGACUGG	standard
445	rno-miR-218a-2-3p	CAUGGUUCUGUCAAGCACCGCG	standard
446	rno-miR-218a-5p	UUGUGCUUGAUCUAACCAUGU	standard
447	rno-miR-218b	CAUGGUUAGAUCAAGCACAA	standard
448	rno-miR-219a-1-3p	AGAGUUGCGUCUGGACGUCCCG	standard
449	rno-miR-219a-2-3p	AGAAUUGUGGCUGGACAUCUGU	standard
450	rno-miR-219a-5p	UGAUUGUCCAAACGCAAUUCU	standard
451	rno-miR-219b	AGAUGUCCAGCCACAAUUCUCG	standard
452	rno-miR-221-3p	AGCUACAUUGUCUGCUGGGUUUC	standard
453	rno-miR-221-5p	ACCUGGCAUACAAUGUAGAUUUC	standard
454	rno-miR-222-3p	AGCUACAUCUGGCUACUGGGU	standard
455	rno-miR-222-5p	GGCUCAGUAGCCAGUGUAGAU	standard
456	rno-miR-223-3p	UGUCAGUUUGUCAAAUACCCC	standard
457	rno-miR-223-5p	CGUGUAUUUGACAAGCUGAGUUG	standard
458	rno-miR-224-5p	CAAGUCACUAGUGGUUCCGUUU	standard
459	rno-miR-290	UCUCAAACUAUGGGGGCA	standard
460	rno-miR-291a-5p	CAUCAAAGUGGAGGCCCUCUCU	standard
461	rno-miR-292-5p	ACUCAAACUGGGGGCUCUUUUG	standard
462	rno-miR-293-3p	AGUGCCGCAAAGUUUGCAGUGU	standard
463	rno-miR-293-5p	ACUCAAACUGUGUGACACUUU	standard
464	rno-miR-294	CUCAAAAUGGAGGCCCUAUCU	standard
465	rno-miR-295-5p	ACUCAAAUGUGGGGCACACUUCU	standard
466	rno-miR-296-3p	GAGGGUUGGGUGGAGGCUCUCC	standard
467	rno-miR-296-5p	AGGGCCCCCCCUCAAUCCUGU	standard
468	rno-miR-297	AUGUAUGUGUGCAUGUAUGCAUG	standard
469	rno-miR-298-3p	AGGAACUAGCCUUCUCUCUGCU	standard
470	rno-miR-298-5p	GGCAGAGGAGGGCUGUUCUUCCC	standard
471	rno-miR-299a-3p	UAUGUGGGACGGUAAACCGCU	standard
472	rno-miR-299a-5p	UGGUUUACCGUCCCACAUACAU	standard
473	rno-miR-299b-3p	UAUGUGGGACGGUAAAC	standard
474	rno-miR-299b-5p	CGGUUUACCGUCCCACAUAC	standard
475	rno-miR-300-3p	UAUGCAAGGGCAAGCUCUCUUC	standard
476	rno-miR-300-5p	UUGAAGAGAGGUUAUCCUUUGU	standard
477	rno-miR-301a-3p	CAGUGCAAUAGUAUUGUCAAAGC	standard
478	rno-miR-301a-5p	GCUCUGACUUUAUUGCACUAC	standard
479	rno-miR-301b-3p	CAGUGCAAUGGUAUUGUCAAAGC	standard
480	rno-miR-301b-5p	GCUCUGACUAGGUUGCACUACU	standard
481	rno-miR-320-5p	GCCUUCUCUUCCCGGUUCUUCC	standard
482	rno-miR-322-5p	CAGCAGCAAUUCAUGUUUUGGA	standard
483	rno-miR-323-3p	CACAUUACACGGUCGACCUCU	standard
484	rno-miR-323-5p	AGGUGGUCCGUGGCGCGUUCGC	standard
485	rno-miR-324-3p	CCACUGCCCCAGGUGCUGCUGG	standard
486	rno-miR-324-5p	CGCAUCCCCUAGGGCAUUGGUGU	standard
487	rno-miR-325-3p	UUUAUUGAGCACCUCCUAUCAA	standard
488	rno-miR-325-5p	CCUAGUAGGUGCUCAGUAAGUGU	standard
489	rno-miR-326-3p	CCUCUGGGCCCUUCCUCCAGU	standard
490	rno-miR-326-5p	GGGGGCAGGGCCUUUGUGAA	standard
491	rno-miR-327	CCUUGAGGGGCAUGAGGGU	standard
492	rno-miR-328a-3p	CUGGCCCUCUCUGCCCUUCCGU	standard
493	rno-miR-328a-5p	GGGGGGCAGGAGGGGCUCA	standard
494	rno-miR-328b-3p	CUGGCCCUCUCUGCCCUA	standard
495	rno-miR-329-5p	AGAGGUUUUCUGGGUCUCUGUUUC	standard
496	rno-miR-330-3p	GCAAAGCACAGGGCCUGCAGAGA	standard
497	rno-miR-330-5p	UCUCUGGGCCUGUGUCUUAGGC	standard
498	rno-miR-331-3p	GCCCCUGGGCCUAUCCUAGAA	standard
499	rno-miR-331-5p	GGUCUUGUUUGGGUUUGUU	standard
500	rno-miR-335	UCAAGAGCAAUAACGAAAAAUGU	standard
501	rno-miR-336-3p	ACUGGAUUCCAUGAAGGGAUGUGA	standard
502	rno-miR-336-5p	UCACCCUUCCAUAUCUAGUCU	standard
503	rno-miR-337-3p	UUCAGCUCCUAUAUGAUGCCUUU	standard
504	rno-miR-337-5p	CGGCGUCAUGCAGGAGUUGAU	standard
505	rno-miR-338-3p	UCCAGCAUCAGUGAUUUUGUUGA	standard
506	rno-miR-339-3p	UGAGCGCCUCGACGACAGAGCCA	standard
507	rno-miR-339-5p	UCCCUGUCCUCCAGGAGCUCACG	standard
508	rno-miR-340-3p	UCCGUCUCAGUUACUUUAUAGCC	standard
509	rno-miR-340-5p	UUAUAAAGCAAUGAGACUGAUU	standard
510	rno-miR-341	UCGGUCGAUCGGUCGGUCGGU	standard
511	rno-miR-342-3p	UCUCACACAGAAAUCGCACCCGU	standard
512	rno-miR-342-5p	AGGGGUGCUAUCUGUGAUUGAG	standard
513	rno-miR-343	UCUCCCUCCGUGUGCCCAGA	standard
514	rno-miR-344a	UCAGGCUCCUGGCUAGAUU	standard
515	rno-miR-344a-3p	UGAUCUAGCCAAAGCCUGACCGU	standard
516	rno-miR-344a-5p	UCAGGCUCCUGGCUAGAUUCCAGG	standard
517	rno-miR-344b-1-3p	GAUAUAACCAAAGCCCGACUGU	standard
518	rno-miR-344b-2-3p	GGUAUAACCAAAGCCCGACUGU	standard
519	rno-miR-344b-5p	AGUCAGGCUGCUGGUUAUAUUC	standard
520	rno-miR-344g	AGUCAGGCUCCUGGCAGGAGUC	standard
521	rno-miR-344i	CUCUAGCCAGGGCUUGACUGCA	standard
522	rno-miR-345-3p	CCCUGAACUAGGGGUCUGGAGA	standard
523	rno-miR-345-5p	UGCUGACCCCUAGUCCAGUGC	standard
524	rno-miR-346	UGUCUGCCUGAGUGCCUGCCUCU	standard
525	rno-miR-347	UGUCCCUCUGGGUCGCCCA	standard
526	rno-miR-349	CAGCCCUGCUGUCUUAACCUCU	standard
527	rno-miR-350	UUCACAAAGCCCAUACACUUUCAC	standard
528	rno-miR-351-3p	GGUCAAGAGGCGCCUGGGAAC	standard
529	rno-miR-351-5p	UCCCUGAGGAGCCCUUUGAGCCUGA	standard
530	rno-miR-352	AGAGUAGUAGGUUGCAUAGUA	standard
531	rno-miR-361-3p	CCCCCAGGUGUGAUUCUGAUUCGU	standard
532	rno-miR-361-5p	UUAUCAGAAUCUCCAGGGGUAC	standard
533	rno-miR-363-5p	CGGGUGGAUCACGAUGCAAUUU	standard
534	rno-miR-365-3p	UAAUGCCCCUAAAAAUCCUUAU	standard
535	rno-miR-365-5p	GAGGGACUUUCAGGGGC	standard
536	rno-miR-369-5p	AGAUCGACCGUGUUAUAUUCGC	standard
537	rno-miR-370-3p	GCCUGCUGGGGUGGAACCUGGU	standard
538	rno-miR-370-5p	CAGGUCACGUCUCUGCAGUUACAC	standard
539	rno-miR-374-3p	CUUAGCACGUUGUAUUAUUAUU	standard
540	rno-miR-374-5p	AUAUAAUACAACCUGCUAAGUG	standard
541	rno-miR-375-3p	UUUGUUCGUUCGGCUCGCGUGA	standard
542	rno-miR-375-5p	GCGACGAGCCCCUCGCACAAACC	standard
543	rno-miR-376a-3p	AUCGUAGAGGAAAAUCCACGU	standard
544	rno-miR-376a-5p	GGUAGAUUCUCCUUCUAUGAG	standard
545	rno-miR-376b-3p	AUCAUAGAGGAACAUCCACUU	standard
546	rno-miR-376b-5p	GUGGAUAUUCCUUCUAUGGUUA	standard
547	rno-miR-376c-5p	GUGGAUAUUCCUUCUAUGUUU	standard
548	rno-miR-377-3p	UGAAUCACACAAAGGCAACUUUU	standard
549	rno-miR-377-5p	AGAGGUUGCCCUUGGUGAAUUC	standard
550	rno-miR-378a-3p	ACUGGACUUGGAGUCAGAAGG	standard
551	rno-miR-378a-5p	CUCCUGACUCCAGGUCCUGUGU	standard
552	rno-miR-378b	AGUGGACUUGGAGUCAGAAGG	standard
553	rno-miR-379-3p	CUAUGUAACAUGGUCCACUAAC	standard
554	rno-miR-379-5p	UGGUAGACUAUGGAACGUAGG	standard
555	rno-miR-380-3p	UAUGUAGUAUGGUCCACAUCU	standard
556	rno-miR-380-5p	AUGGUUGACCAUAGAACAUGCG	standard
557	rno-miR-381-3p	UAUACAAGGGCAAGCUCU	standard
558	rno-miR-381-5p	AGCGAGGUUGCCCUUUGUAUAU	standard
559	rno-miR-382-5p	GAAGUUGUUCGUGGUGGAUUCG	standard
560	rno-miR-383-3p	CCACAGCACUGCCUGGUCAGA	standard
561	rno-miR-383-5p	CAGAUCAGAAGGUGACUGUGG	standard
562	rno-miR-384-3p	AUUCCUAGAAAUUGUUCACAAU	standard
563	rno-miR-384-5p	UGUAAACAAUUCCUAGGCAAUGU	standard
564	rno-miR-409a-5p	AGGUUACCCGAGCAACUUUGCAU	standard
565	rno-miR-409b	AGGGGUUCACCGAGCAACAUUCG	standard
566	rno-miR-410-5p	AGGUUGUCUGUGAUGAGUUCG	standard
567	rno-miR-411-3p	UAUGUAACACGGUCCACUAA	standard
568	rno-miR-411-5p	UAGUAGACCGUAUAGCGUACG	standard
569	rno-miR-412-3p	CUUCACCUGGUCCACUAGCCGU	standard
570	rno-miR-412-5p	UGGUCGACCAGCUGGAAAGU	standard
571	rno-miR-421-3p	AUCAACAGACAUUAAUUGGG	standard
572	rno-miR-421-5p	GGCCUCAUUAAAUGUUUGUUG	standard
573	rno-miR-423-3p	AGCUCGGUCUGAGGCCCCUCAGU	standard
574	rno-miR-423-5p	UGAGGGGCAGAGAGCGAGACUUUU	standard
575	rno-miR-425-3p	AUCGGGAAUAUCGUGUCCGCC	standard
576	rno-miR-429	UAAUACUGUCUGGUAAUGCCGU	standard
577	rno-miR-431	UGUCUUGCAGGCCGUCAUGCA	standard
578	rno-miR-433-3p	AUCAUGAUGGGCUCCUCGGUGU	standard
579	rno-miR-433-5p	UACGGUGAGCCUGUCAUUAUUC	standard
580	rno-miR-434-3p	UUUGAACCAUCACUCGACUCCU	standard
581	rno-miR-434-5p	AGCUCGACUCAUGGUUUGAACCA	standard
582	rno-miR-448-3p	UUGCAUAUGUAGGAUGUCCCA	standard
583	rno-miR-449a-3p	CAGCUAACAUGCAACUGCUCUC	standard
584	rno-miR-449a-5p	UGGCAGUGUAUUGUUAGCUGGU	standard
585	rno-miR-449c-3p	UAGAACUUCGUCCCAAC	standard
586	rno-miR-449c-5p	AGGCAGUGCAUUGCUAGCUGG	standard
587	rno-miR-450a-3p	UAUUGGGAACAUUUUGCAUAA	standard
588	rno-miR-450a-5p	UUUUGCGAUGUGUUCCUAAUGU	standard
589	rno-miR-451-3p	AUGGUAAUGGUUCUCUUGCUGCU	standard
590	rno-miR-455-3p	GCAGUCCACGGGCAUAUACACU	standard
591	rno-miR-455-5p	UAUGUGCCUUUGGACUACAUCG	standard
592	rno-miR-463-3p	UGAUAGACGCCAAUUUGGGUAG	standard
593	rno-miR-463-5p	UACCUAAUUUGUUGUCCAUCA	standard
594	rno-miR-465-3p	UGAUCAGUGCCUUUCUGAGUAG	standard
595	rno-miR-465-5p	UAUUUAGAACGGUGCUGGUGUG	standard
596	rno-miR-466b-1-3p	AUACAUACACACACACAUACAC	standard
597	rno-miR-466b-2-3p	AUAUACAUACACACAUACACA	standard
598	rno-miR-466b-5p	UAUGUGUGUGUGUAUGUCCAUG	standard
599	rno-miR-466c-3p	UAUACAUGCACACAUACACAC	standard
600	rno-miR-466c-5p	UGUGAUGUGUGCAUGUACAUG	standard
601	rno-miR-466d	AUGUGUGUGUAUGUUCUUUUGU	standard
602	rno-miR-471-3p	UGAAAGGUGCCAUACUAUGU	standard
603	rno-miR-471-5p	UACGUAGUAUAGUGCUUUUCAC	standard
604	rno-miR-483-3p	CACUCCUCCCCUCCCGUCUUGU	standard
605	rno-miR-484	UCAGGCUCAGUCCCCUCCCGAU	standard
606	rno-miR-485-3p	CAUACACGGCUCUCCUCUCUUC	standard
607	rno-miR-485-5p	AGAGGCUGGCCGUGAUGAAUUC	standard
608	rno-miR-487b-5p	AGUGGUUAUCCCUGUCCUCUUCG	standard
609	rno-miR-488-3p	UUGAAAGGCUGUUUCUUGGUC	standard
610	rno-miR-488-5p	CCCAGAUAAUGGCACUCUCAA	standard
611	rno-miR-489-3p	AUGACAUCACAUAUAUGGCAGC	standard
612	rno-miR-489-5p	UGUCGUAUGCGUGAUGACACGUUC	standard
613	rno-miR-490-3p	CAACCUGGAGGACUCCAUGCUG	standard
614	rno-miR-490-5p	CCAUGGAUCUCCAGGUGGGU	standard
615	rno-miR-493-3p	UGAAGGUCUACUGUGUGCCAG	standard
616	rno-miR-493-5p	UUGUACAUGGUAGGCUUUCAUU	standard
617	rno-miR-494-3p	UGAAACAUACACGGGAAACCUCU	standard
618	rno-miR-494-5p	AGGUUGUCCGUGUUGUCUUCUC	standard
619	rno-miR-496-3p	AGUAUUACAUGGCCAAUCUCC	standard
620	rno-miR-496-5p	AGGUUGUCCAUGGUGUGUUC	standard
621	rno-miR-497-3p	CCAAACCACACUGUGGUGUUAGA	standard
622	rno-miR-497-5p	CAGCAGCACACUGUGGUUUGUA	standard
623	rno-miR-499-5p	UUAAGACUUGCAGUGAUGUUU	standard
624	rno-miR-503-3p	GGAGUAUUGUUUCCGCUGCCUGG	standard
625	rno-miR-503-5p	UAGCAGCGGGAACAGUACUGCAG	standard
626	rno-miR-504	AGACCCUGGUCUGCACUCUGUC	standard
627	rno-miR-505-3p	GUCAACACUUGCUGGUUUCC	standard
628	rno-miR-505-5p	GGGAGCCAGGAAGUAUUGAUGUU	standard
629	rno-miR-509-3p	UGAUUGACAUGUCUGCAGUGGA	standard
630	rno-miR-509-5p	UACUCCAGAAUAUGGCAAUCAUG	standard
631	rno-miR-511-5p	CAUGCCUUUUGCUCUGCACUC	standard
632	rno-miR-532-3p	CCUCCCACACCCAAGGCUUGCA	standard
633	rno-miR-532-5p	CAUGCCUUGAGUGUAGGACUGU	standard
634	rno-miR-539-3p	CAUACAAGGGUAAUUUCUUUUC	standard
635	rno-miR-539-5p	GGAGAAAUUAUCCUUGGUGUGU	standard
636	rno-miR-540-3p	AGGUCAGAGGUCGAUCCUGGGC	standard
637	rno-miR-540-5p	CAAGGGUCACCCUCUGACUCUGU	standard
638	rno-miR-541-3p	AGUGGCGAACACAGAAUCCAUAC	standard
639	rno-miR-542-3p	UGUGACAGAUUGAUAACUGAAA	standard
640	rno-miR-542-5p	CUCGGGGAUCAUCAUGUCACGA	standard
641	rno-miR-544-3p	AUUCUGCAUUUUUAGCAAGCU	standard
642	rno-miR-544-5p	CUUGUUAAAAAGCAGAUUCU	standard
643	rno-miR-547-3p	AUUGGUACUUCUUUAAGUGAGA	standard
644	rno-miR-547-5p	UCACUUCAGGAUGUACCACCCA	standard
645	rno-miR-551b-3p	GGCGACCCAUACUUGGUUUCAGU	standard
646	rno-miR-551b-5p	GAAAUCAAGCUUGGGUGAGACCU	standard
647	rno-miR-568	AUGUAUAAAUGUAUACACAC	standard
648	rno-miR-582-5p	UACAGUUGUUCAACCAGUUACU	standard
649	rno-miR-592	AUUGUGUCAAUAUGCGAUGAUGU	standard
650	rno-miR-598-3p	UACGUCAUCGUCGUCAUCGUUA	standard
651	rno-miR-598-5p	GCGGUGAUGCCGAUGGUGCGAG	standard
652	rno-miR-615	GGGGGUCCCCGGUGCUCGGAUC	standard
653	rno-miR-628	AUGCUGACAUAUUUACGAGAGG	standard
654	rno-miR-632	GUGUCUGUUUCCUGCCGGA	standard
655	rno-miR-653-3p	UUCACUGGGGUUUGUUUCACUA	standard
656	rno-miR-653-5p	UUGAAACAUUCUCUACUGAAC	standard
657	rno-miR-664-1-5p	CUGGCUGGGGAAAAAGAUUGG	standard
658	rno-miR-664-2-5p	CUGGCUGGGGAAAAUGAUUGG	standard
659	rno-miR-664-3p	UAUUCAUUUACUCCCCAGCCUA	standard
660	rno-miR-665	ACCAGGAGGCUGAGGUCCCUUA	standard
661	rno-miR-666-3p	GGCUGCAGCGUGAUCGCCUGCUC	standard
662	rno-miR-666-5p	AGCGGGCACGGCUGUGAGAG	standard
663	rno-miR-667-3p	UGACACCUGCCACCCAGCCCAA	standard
664	rno-miR-667-5p	CGGUGCUGGUGGAGCAGUGAGCAC	standard
665	rno-miR-668	UGUCACUCGGCUCGGCCCACUACC	standard
666	rno-miR-671	UCCGGUUCUCAGGGCUCCACC	standard
667	rno-miR-672-5p	UGAGGUUGGUGUACUGUGUGUGA	standard
668	rno-miR-673-3p	UCCGGGACUGAGUUCUGUGCAC	standard
669	rno-miR-673-5p	CUCACAGCUCCGGUCCUUGGAG	standard
670	rno-miR-674-3p	CACAGCUCCCAUCUCAGAACAA	standard
671	rno-miR-674-5p	GCACUGAGAUGGGAGUGGUGUA	standard
672	rno-miR-675-3p	UGUAUGCCCUAACCGCUCAGU	standard
673	rno-miR-675-5p	UGGUGCGGAAAGGGCCCACAGU	standard
674	rno-miR-678	GUCUCGGGGCAAGGACUGGAGG	standard
675	rno-miR-679	CAAGGUCUUCCUCACAGUAGC	standard
676	rno-miR-702-3p	UGCCCACCCUUUACCCCACUCCA	standard
677	rno-miR-702-5p	GUGAGUGGGGUGGUUGGCAUG	standard
678	rno-miR-708-3p	CAACUAGACUGUGAGCUUCUAG	standard
679	rno-miR-711	GGGACCCUGGGAGAGAUGUAAG	standard
680	rno-miR-741-5p	UACAUAGAUUGGUACCUAUCA	standard
681	rno-miR-742-3p	GAAAGCCACCAUGUUGGGUAAA	standard
682	rno-miR-742-5p	UACUCACAUGGUUGCUAAUCA	standard
683	rno-miR-743a-3p	GAAAGACGCCAAACUGGGUAGA	standard
684	rno-miR-743a-5p	UAUUCAGAUUGGUGCCUGUCAU	standard
685	rno-miR-743b-3p	GAAAGACACCAUACUGAAUAGA	standard
686	rno-miR-743b-5p	UGUUCAGACUGGUGUCCAUCAU	standard
687	rno-miR-758-3p	UUUGUGACCUGGUCCACUAACC	standard
688	rno-miR-758-5p	UGGUUGACCAGAGAGCACACG	standard
689	rno-miR-759	GCAGAGUGCAAACAAUUUUGAC	standard
690	rno-miR-760-3p	CGGCUCUGGGUCUGUGGGGA	standard
691	rno-miR-760-5p	CCCCUCAGGCCACCAGAGCCCG	standard
692	rno-miR-761	GCAGCAGGGUGAAACUGACACA	standard
693	rno-miR-764-3p	GAGGAGGCCAUAGUGGCAACUGU	standard
694	rno-miR-764-5p	GGUGCUCACAUGUCCUCCUCCA	standard
695	rno-miR-770-3p	GUGGGCCUGACGUGGAG	standard
696	rno-miR-770-5p	AGCACCACGUGUCUGGGCCACG	standard
697	rno-miR-802-3p	ACGGAGAGUCUUUGUCACUCAGU	standard
698	rno-miR-802-5p	UCAGUAACAAAGAUUCAUCCU	standard
699	rno-miR-871-3p	UGACUGGCACCAUACUGGAUAA	standard
700	rno-miR-871-5p	UAUUCAGAUUGGUGCCGGUCACAU	standard
701	rno-miR-872-3p	UGAACUAUUGCAGUAGCCUCCU	standard
702	rno-miR-873-3p	GAGACUGACAAGUUCCCGGGA	standard
703	rno-miR-873-5p	GCAGGAACUUGUGAGUCUCCU	standard
704	rno-miR-874-3p	CUGCCCUGGCCCGAGGGACCGA	standard
705	rno-miR-874-5p	CGGCCCCACGCACCAGGGUAA	standard
706	rno-miR-875	UAUACCUCAGUUUUAUCAGGUG	standard
707	rno-miR-876	UGGAUUUCUCUGUGAAUCACCA	standard
708	rno-miR-877	GUAGAGGAGAUGGCGCAGGG	standard
709	rno-miR-878	GCAUGACACCAUACUGGGUAGA	standard
710	rno-miR-879-3p	CUUAUGGCUUCAAGCUUUCGG	standard
711	rno-miR-879-5p	AGAGGCUUAUAGCUCUAAGCC	standard
712	rno-miR-880-3p	UACUCCAUUCAUUCUGAGUAGA	standard
713	rno-miR-880-5p	UACUCAGAUUGGUAUGAGUCA	standard
714	rno-miR-881-3p	UAACUGUGGCAUUUCUGAAUAG	standard
715	rno-miR-881-5p	UAUUCAGAGUGGUAGCAGU	standard
716	rno-miR-883-3p	UAACUGCAACAUCUCUCAGUAU	standard
717	rno-miR-883-5p	UGCUGAGAGAAGUAGCAGUUACU	standard
718	rno-miR-935	CCAGUUACCGCUUCCGCUACCGC	standard
719	rno-miR-1188-3p	CGAGGCUCCCCACCACA	standard
720	rno-miR-1188-5p	UGGUGUGAGGUUGGGCCAGGA	standard
721	rno-miR-1193-3p	UAGGUCACCCGUUUUACUAUCC	standard
722	rno-miR-1193-5p	AUGGUAAACCGGUGACGUGC	standard
723	rno-miR-1199-3p	UGCGGCCGGUGCUCAGCCGGC	standard
724	rno-miR-1199-5p	UCUGAGUCCGGGUCGCGCGG	standard
725	rno-miR-1224	GUGAGGACUGGGGAGGUGGAG	standard
726	rno-miR-1249	ACGCCCUUCCCCCCCUUCUUCA	standard
727	rno-miR-1298	UUCAUUCGGCUGUCCAGAUGUA	standard
728	rno-miR-1306-3p	GACGUUGGCUCUGGUGGUGAUG	standard
729	rno-miR-1306-5p	CCACCUCCCCUGCAAACGUCCA	standard
730	rno-miR-1839-3p	AGACCUACUUAUCUACCAACAG	standard
731	rno-miR-1843-3p	UCUGAUCGUUCACCUCCAUACA	standard
732	rno-miR-1843-5p	UAUGGAGGUCUCUGUCUGACU	standard
733	rno-miR-1912-3p	CACAGAACAUGCAGUGAGA	standard
734	rno-miR-1912-5p	UGCUCAUUGCAUGGGCUAUGU	standard
735	rno-miR-1949	UAUACCAGGAUGUCAGCAUAGUU	standard
736	rno-miR-2985	UGUUAUAGUAUCCCACCUACCC	standard
737	rno-miR-3065-3p	UCAGCACCAGGAUAUUGUUGGGGA	standard
738	rno-miR-3065-5p	UCAACAAAAUCACUGAUGCU	standard
739	rno-miR-3068-3p	GGUGAAUUGCAGUACUCCAACA	standard
740	rno-miR-3068-5p	UUGGAGUUCAUGCAAGUUCUAACCA	standard
741	rno-miR-3072	UGCCCCCUCCAGGAAGCCUUCUU	standard
742	rno-miR-3074	GAUAUCAGCUCAGUAGGCACCG	standard
743	rno-miR-3075	UGUCUGGGAGCAGCCAAGGACAAG	standard
744	rno-miR-3085	UCUGGCUGCUAUGGCCCCCUC	standard
745	rno-miR-3099	UAGGCUAGAAAGAGGUUGGGGA	standard
746	rno-miR-3102	CUCUACUCCCUGCCCCAGCCA	standard
747	rno-miR-3120	CACAGCAAGUGUAGACAGGCA	standard
748	rno-miR-3473	UCUAGGGCUGGAGAGAUGGCUA	standard
749	rno-miR-3541	UCCCUCCCCCUCACUGCA	standard
750	rno-miR-3543	CAGGAGUCGAGUGAUGGUUCAAA	standard
751	rno-miR-3546	AUAACCCGGGCCAAAAGCUCAC	standard
752	rno-miR-3547	UGAGCACCACCCCUCUCUCAGAU	standard
753	rno-miR-3548	CAGCACUGUCCGGUAAGAUGCC	standard
754	rno-miR-3549	AUCUUGCCCGCAAAGACCC	standard
755	rno-miR-3550	CCGAGCCCAUCCCUGCCCUAG	standard
756	rno-miR-3551-3p	UGAAAUUCACCAUGGUGGGUAAA	standard
757	rno-miR-3551-5p	UCUUCACCAUGGUGUUUUUGACAU	standard
758	rno-miR-3552	AGGCUGCAGGCCCACUUCCCU	standard
759	rno-miR-3553	CAGUGAAUUCUACCAGUGCCAUA	standard
760	rno-miR-3556a	CGAUUUCAGAUGGUGCUA	standard
761	rno-miR-3556b	ACCGAUUUCAAAUGGUGCUA	standard
762	rno-miR-3557-5p	GCCUUCUGACUCCAAGUCCAGU	standard
763	rno-miR-3558-3p	ACUGUGGAGGGUUUCUAUGU	standard
764	rno-miR-3558-5p	CCAUAGAAGUCAUCCCACAGUGCC	standard
765	rno-miR-3559-3p	AUGUAGUACUGAGUCUGUCGUG	standard
766	rno-miR-3559-5p	UGACAGACUUAGUACUACAUGA	standard
767	rno-miR-3560	CAAAUCCUUGCCCGGGUGCAUU	standard
768	rno-miR-3561-3p	UAUCCAGGGUAGACACUCAGA	standard
769	rno-miR-3561-5p	ACUGUGUCAAUCCAGGGUAGA	standard
770	rno-miR-3562	UUGGGGCAGUGGCUGGAUGGGA	standard
771	rno-miR-3564	UGGGAAAUGCAAAGAGGGAAG	standard
772	rno-miR-3566	CUGCCUAACAAUGAACUACC	standard
773	rno-miR-3568	UGUUCUUCCCGUGCAGAAGCAG	standard
774	rno-miR-3569	GGAGGACAGCAGACUCAGGUC	standard
775	rno-miR-3570	GGUACAAUCAACGGUCGAUGGU	standard
776	rno-miR-3571	UACACACUUCUUUACAUUCCAUA	standard
777	rno-miR-3572	UUACACUUGCCCUUUUUUCCCCAG	standard
778	rno-miR-3573-3p	UUCCUAACUCUGCCCCCUCCCAU	standard
779	rno-miR-3573-5p	UGAGGGGCAGUGAUAGAAAGGA	standard
780	rno-miR-3574	UCAGCCGCUGUCACACGCACAG	standard
781	rno-miR-3575	ACUGCUGGGUAAGACGAG	standard
782	rno-miR-3577	UCUGUCCCUCUUGGCCCUUAG	standard
783	rno-miR-3578	GCGAAUAUAACACGGUCGAUCU	standard
784	rno-miR-3579	GCGCAUGUUCUAUGGUCAACCA	standard
785	rno-miR-3580-3p	UGACUAGGGUAGUAUGAGUAGA	standard
786	rno-miR-3580-5p	UGCUUGUACUUAUUCUGGUGAC	standard
787	rno-miR-3583-3p	CCUGACUUCUCUCUUCAUGCAG	standard
788	rno-miR-3583-5p	AGCAUGAAGAGUUCAGAUCACGUU	standard
789	rno-miR-3584-3p	GCCCGCAUCUCUGGAUCCC	standard
790	rno-miR-3584-5p	GGGAGGAGUCCAGGAGGC	standard
791	rno-miR-3585-3p	UGAACGGCCCUUGUUGUGA	standard
792	rno-miR-3585-5p	UUCACAAGAAGGUGUCUUUCAU	standard
793	rno-miR-3586-3p	AUACUAGACUGUGAGCUCCUCGA	standard
794	rno-miR-3586-5p	UCCCUGUCCUCAAGGAG	standard
795	rno-miR-3588	UCACAAGUUAGGGUCUCAGGGA	standard
796	rno-miR-3589	GAGGAAACCAGCAAGUGUUGAC	standard
797	rno-miR-3590-3p	UAGCACAAUGUGAAAAGAGCUC	standard
798	rno-miR-3590-5p	UGCCCUUUUAACAUUGCACUG	standard
799	rno-miR-3593-3p	CUUCAACCUUAAGGGGGCCUCA	standard
800	rno-miR-3593-5p	UGGCCUCCGCAGGGUUGAAGCU	standard
801	rno-miR-3594-3p	CACACCGCCUCUGCCCGCUAGU	standard
802	rno-miR-3594-5p	CCCAGGGCAGAGCAGUGUGAA	standard
803	rno-miR-3595	GUGGAUUUUCCUCUACGAU	standard
804	rno-miR-3596c	ACUAUACAACCUCCUACCUCA	standard
805	rno-miR-3596d	CUAUACAAUCUACUACCUCA	standard
806	rno-miR-6215	UUUAGGGUUGCAGAGCCAGG	standard
807	rno-miR-6216	GAUACACAGAGGCAGGAGGAGAA	standard
808	rno-miR-6314	AGGCACUGACAGAUCUGAUGGU	standard
809	rno-miR-6315	UCUGGACAGGACAGGCCCUGAGC	standard
810	rno-miR-6316	CAUGUCUGUCUCUGUGGCACACA	standard
811	rno-miR-6317	GUGAACCUGAGAGAAAGGCUC	standard
812	rno-miR-6318	CUGCCUGGCGCAGGGCCUGUAG	standard
813	rno-miR-6319	UCAUUCUCGCUGCUCUGGAGU	standard
814	rno-miR-6320	UGAACAUGCUUGUAAUCUCAGCA	standard
815	rno-miR-6321	UACUGCAGUGAGUUCUAUGAAGC	standard
816	rno-miR-6322	UGUCUGUACCACAUGGCACGGU	standard
817	rno-miR-6323	UGGAACUCCAUCUCUGGUCUGUGCA	standard
818	rno-miR-6324	UCAGUAGGCCAGACAGCAAGCAC	standard
819	rno-miR-6326	CUGGUCUGUAAAGGGACACAGCA	standard
820	rno-miR-6327	CGGACUGUAGAUCCAUCUC	standard
821	rno-miR-6328	AGGCCUGCUCUGAGCCCCCGC	standard
822	rno-miR-6330	UAUAAUGACCAGAUCUGGGUCA	standard
823	rno-miR-6331	CUUUGGUGGCUUAGUUCUUUGUGC	standard
824	rno-miR-6332	CGCAGGGACUGCAAGGAGCCGCA	standard
825	rno-miR-6333	UAGGCUGGACUUGAACAGCCCGC	standard
826	rno-miR-6334	CCAGGCUCUCCCAGCUGCCGGC	standard
827	rno-miR-7578	CGUGGCUCGUCUUCUGCCUCAGA	standard
